# Supplementary material for: CRISPR screens reveal neuropeptide signaling orchestrates T helper cell differentiation
Source: Research Square preprint supplement (doi:10.21203/rs.3.rs-1953978/v1), 2022-08-16
Supplement: Supplementary file 1 [file 1a9a0b0c97a7c955140fb9b2.pdf]

## **MATERIALS AND METHODS**

### **Data and code availability**

Bulk and single-cell RNA-seq, and ATAC-seq data have been deposited at GEO under accession number GSE192728 and are publicly available as of the date of publication.

### **Mice**

All mouse experiments were approved by the Institutional Animal Care and Use Committee (IACUC) at Brigham and Women's Hospital. Constitutive-Cas9-GFP mice (028555) were purchased from Jackson Laboratory and further crossed with SMARTA (Jackson Laboratory 030450) for *in vivo* screening. *Calca*<sup>-/-</sup> mice<sup>1</sup> were provided by Hiroki Kurihara (The University of Tokyo, Tokyo) and distributed by RIKEN BioResource Research Center. *Ramp1*<sup>-/-</sup> mice<sup>2</sup> were provided by Wade Kingery (Veterans Affairs Palo Alto Health Care System) with permission by Kazutake Tsujikawa (Osaka University, Osaka). *Ramp3*<sup>-/-</sup> mice<sup>3</sup> were provided by Kathleen Caron lab (the University of North Carolina at Chapel Hill). *Stat1*<sup>fl<sup>ox</sup>/fl<sup>ox</sup></sup> mice were provided by John O'Shea lab (NIH, U.S.) and further crossed with CD4<sup>Cre</sup> (Jackson Laboratory 022071).

### **LCMV infection and plaque assay**

1 x 10<sup>6</sup> plaque-forming units (PFU) of Armstrong were injected intraperitoneally (I.P.) for acute LCMV infection. At day 8 of Armstrong infection, splenocytes were isolated and restimulated with LCMV peptide (GP<sub>61-80</sub> or GP<sub>33-41</sub>) or PMA/ionomycin in the presence of GolgiPlug, Golgi-Stop for intracellular cytokine analyses. IAb-GP<sub>66-77</sub> and H-2D<sup>b</sup>-GP<sub>33-41</sub> tetramers (provided by NIH tetramer Core Facility) were used for antigen-specific analyses. Vero cells were cultured on 6-well plates for 24 hours before doing viral load assay. Viral load was detected by incubating cultured Vero cells with diluted homogenized tissue samples for 1 hour followed by agarose overlay. After four days of culture, Vero cells were stained with neutral red, and plaques were quantified 14 hour later.

### **T cell isolation and *in vitro* differentiation**

Naïve CD4<sup>+</sup> T cells were isolated from the spleen and peripheral lymph nodes (pLN) of WT or Cas9-GFP mice followed by flow cytometry sorting for CD4<sup>+</sup> CD25<sup>-</sup> CD44<sup>-</sup> CD62L<sup>+</sup> cells. Sorted

naïve CD4<sup>+</sup> T cells were activated with plate-bound anti-CD3 (1µg/ml, clone 145-2C11, Bio X Cell) and anti-CD28 (1µg/ml, clone PV-1, Bio X Cell) and further polarized with cytokines for Th1 (IL-12, 20ng/mL, R&D Systems) or Th2 (IL-4, 20ng/mL, R&D Systems). For Th1/Th2 dichotomous culture, medium was supplemented with both IL-12 (0.2ng/mL) and IL-4 (0.2ng/mL).

### **Bulk RNA-Seq time course**

*In vitro* cultured T cells were collected at each time point into RLT-plus buffer, and RNA was extracted with RNeasy Plus Mini Kit (Qiagen). Extracted RNA was further used for cDNA amplification with the SMARTA-Seq2 protocol <sup>4</sup> for 12 cycles. cDNA was further sonicated, and sequencing libraries were prepared using a NEBNext Ultra II RNA Library Prep Kit for Illumina (NEB) and sequenced by HiSeq X with 2 x 150 paired-end reads.

### **Bulk RNA-seq data analyses**

Sequenced reads were trimmed for adaptor sequences and amplification primers, and masked for low-complexity or low-quality sequence with Trimmomatic V0.30 <sup>5</sup>. Clean sequencing reads were mapped to the mouse genome version mm10 using bowtie2 v2.3.4.3 <sup>6</sup>. Fragments Per Kilobase of transcript per Million mapped reads (FPKM) were calculated using cufflinks V2.0.2 <sup>7</sup>. Differentially expressed genes (DEGs) were defined with DESeq2 <sup>8</sup> unless otherwise noted, and false discovery rates (FDRs) were computed using the Benjamini-Hochberg Procedure for multiple hypotheses testing correction. Gene sets were tested for enrichment in Gene Ontology terms using Enrichr <sup>9-11</sup>. Gene set enrichment scores and p-values were computed with GSEA <sup>12,13</sup>.

### **T cell isolation after LCMV infection for scRNA-seq**

At day 8 of Armstrong infection, splenocytes were isolated and sorted for activated CD4<sup>+</sup> T cells (CD4<sup>+</sup>, CD44<sup>+</sup>) and naïve CD4<sup>+</sup> T cells (CD4<sup>+</sup>, CD44<sup>-</sup>, CD62L<sup>high</sup>) separately. Activated CD4<sup>+</sup> T cells and naïve CD4<sup>+</sup> T cells were mixed with 10:1 ratio before doing single cell RNA-seq (10x Genomics).

### **Single cell RNA-seq**

*In vitro* cultured T cells or *in vivo* isolated T cell populations were sorted and incubated with hashtag antibodies (BioLegend). 8 samples labeled with distinct hashtag antibodies were mixed

with equal cell numbers for each channel (10x Genomics). Libraries for *in vitro* samples were prepared using the Chromium Single Cell 5' Library & Gel Bead Kit (10x Genomics), and for *in vivo* samples using the Chromium Single Cell 3' Library & Gel Bead Kit (10x Genomics). All libraries were sequenced on a HiSeq X (Illumina) with paired-end reads of 28 cycles for read 1 and 91 cycles for read 2.

### **Single cell RNA-seq data preprocessing**

Single cell RNA-seq reads were demultiplexed and aligned to the mm10 mouse reference genome using 10x Genomics Cell Ranger V2.2.0<sup>14</sup> (10x Genomics). 5,774 single cells were detected for LCMV infection CD4<sup>+</sup> T cell dataset, and 4,403 high quality cells were retained after quality control (at least 1200 and no more than 3000 genes were detected in a cell (UMI count > 0). LCMV Armstrong infection data were normalized using log normalization (log1p counts per 10,000), and top 2000 highly variable genes were identified using the FindVariableFeatures function in Seurat V4.0.2<sup>15</sup>. The RunPCA function was applied to the z-normalized expression of the highly variable genes, and the top 20 PCs were used for downstream analyses.

### **Single cell RNA-seq clustering and differential expression analysis**

Cell clusters were identified using the FindNeighbors and the FindClusters (resolution = 0.5) functions in Seurat, which constructed a *k*-nearest neighbor (*k*-NN; *k*=30) graph for cells in the PC space and then optimized the modularity function to identify clusters with the smart local moving (SLM) community detection algorithm<sup>16</sup>. A Uniform Manifold Approximation and Projection (UMAP) embedding was computed using the RunUMAP function with the top 20 PCs. Specifically, min.dist and n.neighbors were set to 0.5 and 50 respectively to better preserve the global structure. Differentially expressed genes for each cluster were identified using the FindAllMarkers function in Seurat, using Wilcox rank-sum test comparing cells in each cluster to cells in all other clusters, and false discovery rates (FDRs) were computed using the Benjamini-Hochberg Procedure for multiple hypotheses testing correction (**Table S2**). Default parameters were used in the analyses above unless otherwise noted.

### **Pseudotime and trajectory analysis**

Trajectory and pseudotime for cells of interest (clusters 0-4) were inferred by Slingshot<sup>17</sup> with the top 2 UMAP dimensions (results were very similar to using top 20 PCs; data not shown). Slingshot identifies global cell fate structure by constructing a minimum spanning tree on cluster centers, and then fitting simultaneous principal curves to obtain smooth trajectory curves and inferring pseudotime.

### **Signature scores in single cell profiles**

Signature scores were computed using the AddModuleScore function in Seurat and cell-cycle scoring was performed using the CellCycleScoring function in Seurat. Cell-cycle genes provided by Seurat in the cc.genes object were used.

### **sgRNA library construction**

3 sgRNAs targeting each selected candidate gene were designed using the online design tool (<https://portals.broadinstitute.org/gpp/public/analysis-tools/sgrna-design>). sgRNA library for pooled screening were generated and cloned into lentiviral vector at the Brie library from the Genetic Perturbation Platform at the Broad Institute. As a quality control, a deep sequencing analysis was performed showing a good representation of all sgRNAs in the pooled plasmids (data not shown). For lentivirus production, HEK293T cells were transfected with sgRNA library together with pMD2.G (Addgene 12259#) and psPAX2 (Addgene 12260#) using PolyJet (SigmaGen Laboratories). At 48-hour post-transfection, cell culture supernatant was collected and frozen down at -80°C for following transduction.

### ***In vitro* screening**

On day 0, naïve T cells were isolated from Cas9 mice and activated with plate-bound anti-CD3 (1µg/ml, Bio X Cell) and anti-CD28 (1µg/ml, Bio X Cell) in the absence of polarization cytokines for 24 hours. On day1, spin transduction was conducted at 1,000g for 1 hour at 37°C with lentivirus-sgRNA library. After transduction, cells were rested with IL-2 (10ng/ml, Miltenyi Biotec) for 2days before restimulation with cytokines for another 2 days to get Th1 (IL-12<sup>+</sup>) or Th2 (IL-4<sup>+</sup>) cells. On day5, intracellular cytokine staining (IFNγ, clone XMG1.2, Biolegend; IL-13, clone eBio13A, eBioscience) was performed using the BD Fixation/Permeabilization Solution Kit (BD Biosciences) after stimulating cells for 4 hours with the PMA/Ionomycin (Sigma-Aldrich)

plus protein transport inhibitors (BD Biosciences). According to the expression of IFN $\gamma$  or IL-13, four distinct cell populations (negative, low, intermediate (IM), or high) were sorted from the transduced cells (Vex<sup>+</sup>) for sgRNA abundance sequencing. As a control sample without phenotypic selection, all Vex<sup>+</sup> cells were sorted for comparison.

### ***Ex vivo and in vivo screens***

LSK cells from Cas9-SMARTA mice were isolated, transduced with sgRNA library lentivirus and then transferred to irradiated recipient mice as previously described<sup>18</sup>. After 8 weeks of immune reconstitution, Naïve CD4<sup>+</sup> T cells expressing both Cas9 and the sgRNA Vex reporter (Vex<sup>+</sup>) were isolated from chimeric mice for *ex vivo* and *in vivo* cell differentiation. For *ex vivo* screens, sorted naïve CD4<sup>+</sup> T cells were differentiated *in vitro* for 3 days with plate-bound anti-CD3 / anti-CD28 in the presence of IL-12 (20ng/mL, R&D Systems) for Th1 or IL-4 (20ng/mL, Miltenyi Biotec) for Th2. Intracellular cytokine (IFN $\gamma$  or IL-4) staining was performed on day3 with well differentiated Th1 / Th2 cells for sorting distinct populations (negative, low, intermediate (IM), or high). For *in vivo* screens, sorted Naïve CD4<sup>+</sup> T cells were transferred to WT recipient mice on day-1 followed by LCMV Armstrong infection at day0. Activated transferred T cells (CD4<sup>+</sup>, CD44<sup>+</sup>, Cas9<sup>+</sup> and Vex<sup>+</sup>) were isolated from the spleen and sorted for distinct cell populations (negative, low, intermediate (IM), or high) of Th1 (IFN $\gamma$ <sup>+</sup>) and Tfh (PD-1<sup>+</sup> & CXCR5<sup>+</sup>) cells at day8 post infection.

### **sgRNA cassette sequencing and data analysis**

To evaluate the sgRNA abundance in each sorted cell population, the genomic DNA was extracted from each sample with QIAamp DNA FFPE kit (QIAGEN). The sgRNA cassette was amplified and sequenced with help from the Genetic Perturbation Platform at the Broad Institute. Sequencing reads were analyzed with PoolQ (Version 3.3.2) to quantify read counts for each sgRNA from the pooled library in a sorted cell population. Raw read counts were further normalized by the number of total sequencing reads in each sample, as follows:  $\log_2(\text{Counts\_for\_each\_sgRNA} / \text{Total\_counts\_in\_PCR\_well} * 10^6 + 1)$ . To evaluate the sgRNA depletion / enrichment, normalized sequencing depth for each sgRNA was further compared with the control sample (all Vex<sup>+</sup> cells) to calculate a Log<sub>2</sub> fold change (LFC) score. To compare the sgRNA abundance across distinct

sorted cell populations (IFN $\gamma$ <sup>high</sup>, IFN $\gamma$ <sup>IM</sup>, IFN $\gamma$ <sup>low</sup>, IFN $\gamma$ <sup>neg</sup>), a delta LFC value (LFC<sup>high</sup> + LFC<sup>IM</sup> - LFC<sup>low</sup> - LFC<sup>neg</sup>) was further calculated for each guide RNA.

## ATAC-seq

ATAC-seq was performed following the Omni-ATAC protocol <sup>19</sup>. 10,000 cells were sorted for each ATAC-seq sample preparation. Sequencing libraries were barcoded using Ad1 and Ad2 primers and were sequenced on HiSeq X (Illumina) with 150bp paired-end reads.

Ad1: AATGATACGGCGACCACCGAGATCTACACTCGTCGGCAGCGTCAGATGTG

Ad2: CAAGCAGAAGACGGCATACGAGATxxxxxxxGTCTCGTGGGCTCGGAGATGT

Sequenced reads were trimmed for adaptor sequence and low-quality sequence with Trimmomatic V0.30 <sup>5</sup>, and mapped to reference mouse genome (version mm10) using bowtie2 v2.3.4.3 <sup>6</sup>. Samtools <sup>20</sup> were used to remove PCR duplicates, sort and index the bam files.. Peak calling was performed with MACS2 <sup>21</sup> and peaks were visualized using Integrative Genomics Viewer (IGV) <sup>22</sup>.

## Integrative analysis of ATAC- and RNA-seq data

Paired bulk ATAC- and RNA-seq for 4-hour *in vitro* cell differentiation (Th1 or Th2 condition) with or without CGRP treatment were analyzed together. Differential chromatin accessibility was determined using the csaw package <sup>23</sup>, generating 50-bp sliding windows along the whole genome, and counting the number of reads overlapping the windows using the windowCounts function. The windows were then filtered using the local enrichment method: for each window, reads were counted in its 1,000bp surrounding neighborhood (+/-500bp from the window center) using the regionCounts function, the increase in read abundance in the 50bp window vs. the 1,000 bp neighborhood was calculated using the filterWindowsLocal function, and windows were excluded from downstream analysis if the increase is less than 3-fold. Specifically, read counts (both windowCounts and regionCounts function) were computed using paired-end reads with read-pair fragment length not exceeding 650bp, discarding alignments in the ENCODE Blacklist regions <sup>24</sup> or with mapping quality scores lower than 10. Count data were then normalized across samples using the offset normalization method, and tested for differential accessibility using edgeR (glmQLFit and glmQLFTest) <sup>25</sup>. Window level differential accessibility results for consecutive windows were combined using the mergeResults function. Merged regions were annotated with

ChIPseeker<sup>26</sup> using the TxDb.Mmusculus.UCSC.mm10.knownGene<sup>27</sup> and org.Mm.eg.db<sup>28</sup> databases. Differentially accessible regions (**Figure 6H**) were clustered using hierarchical clustering (Euclidean distance on row-scaled normalized accessibility, Ward ("ward.D" in the hclust function in the R stats v4.1.2 package) agglomeration method). Samples were clustered in the same way. Default parameters were used unless otherwise specified.

Differential expression analysis was performed using edgeR (glmQLFit and glmQLFTest). Only genes detected ( $\geq 10$  reads) in all samples of at least one group (Th1/Th2 and Vehicle/CGRP combination) were used. Default parameters were used unless otherwise specified.

### **Quantification and statistical analysis**

Statistical analysis of non-sequencing data was performed with the GraphPad Prism software (GraphPad, version 9.2.0). Unless otherwise specified, data are presented as the mean with  $\pm$  S.D. and statistical significance was determined using unpaired two-tailed t test. P values  $< 0.05$  are considered significant (ns, not significant; \*,  $p < 0.05$ ; \*\*,  $p < 0.01$ ; \*\*\*,  $p < 0.001$ ).

## Reference

- 1 Oh-hashii, Y. *et al.* Elevated sympathetic nervous activity in mice deficient in alphaCGRP. *Circ Res* **89**, 983-990 (2001). <https://doi.org:10.1161/hh2301.100812>
- 2 Tsujikawa, K. *et al.* Hypertension and dysregulated proinflammatory cytokine production in receptor activity-modifying protein 1-deficient mice. *Proc Natl Acad Sci U S A* **104**, 16702-16707 (2007). <https://doi.org:10.1073/pnas.0705974104>
- 3 Dackor, R., Fritz-Six, K., Smithies, O. & Caron, K. Receptor activity-modifying proteins 2 and 3 have distinct physiological functions from embryogenesis to old age. *J Biol Chem* **282**, 18094-18099 (2007). <https://doi.org:10.1074/jbc.M703544200>
- 4 Picelli, S. *et al.* Full-length RNA-seq from single cells using Smart-seq2. *Nat Protoc* **9**, 171-181 (2014). <https://doi.org:10.1038/nprot.2014.006>
- 5 Bolger, A. M., Lohse, M. & Usadel, B. Trimmomatic: a flexible trimmer for Illumina sequence data. *Bioinformatics* **30**, 2114-2120 (2014). <https://doi.org:10.1093/bioinformatics/btu170>
- 6 Langmead, B. & Salzberg, S. L. Fast gapped-read alignment with Bowtie 2. *Nat Methods* **9**, 357-359 (2012). <https://doi.org:10.1038/nmeth.1923>
- 7 Trapnell, C. *et al.* Transcript assembly and quantification by RNA-Seq reveals unannotated transcripts and isoform switching during cell differentiation. *Nat Biotechnol* **28**, 511-515 (2010). <https://doi.org:10.1038/nbt.1621>
- 8 Love, M. I., Huber, W. & Anders, S. Moderated estimation of fold change and dispersion for RNA-seq data with DESeq2. *Genome Biol* **15**, 550 (2014). <https://doi.org:10.1186/s13059-014-0550-8>
- 9 Chen, E. Y. *et al.* Enrichr: interactive and collaborative HTML5 gene list enrichment analysis tool. *BMC Bioinformatics* **14**, 128 (2013). <https://doi.org:10.1186/1471-2105-14-128>
- 10 Kuleshov, M. V. *et al.* Enrichr: a comprehensive gene set enrichment analysis web server 2016 update. *Nucleic Acids Res* **44**, W90-97 (2016). <https://doi.org:10.1093/nar/gkw377>
- 11 Xie, Z. *et al.* Gene Set Knowledge Discovery with Enrichr. *Curr Protoc* **1**, e90 (2021). <https://doi.org:10.1002/cpz1.90>
- 12 Mootha, V. K. *et al.* PGC-1alpha-responsive genes involved in oxidative phosphorylation are coordinately downregulated in human diabetes. *Nat Genet* **34**, 267-273 (2003). <https://doi.org:10.1038/ng1180>
- 13 Subramanian, A. *et al.* Gene set enrichment analysis: a knowledge-based approach for interpreting genome-wide expression profiles. *Proc Natl Acad Sci U S A* **102**, 15545-15550 (2005). <https://doi.org:10.1073/pnas.0506580102>
- 14 Zheng, G. X. *et al.* Massively parallel digital transcriptional profiling of single cells. *Nat Commun* **8**, 14049 (2017). <https://doi.org:10.1038/ncomms14049>
- 15 Hao, Y. *et al.* Integrated analysis of multimodal single-cell data. *Cell* **184**, 3573-3587.e3529 (2021). <https://doi.org:10.1016/j.cell.2021.04.048>
- 16 Waltman, L. & van Eck, N. J. A smart local moving algorithm for large-scale modularity-based community detection. *The European Physical Journal B* **86**, 471 (2013). <https://doi.org:https://doi.org/10.1140/epjb/e2013-40829-0>



- 17 Street, K. *et al.* Slingshot: cell lineage and pseudotime inference for single-cell transcriptomics. *BMC Genomics* **19**, 477 (2018). <https://doi.org/10.1186/s12864-018-4772-0>
- 18 LaFleur, M. W. *et al.* A CRISPR-Cas9 delivery system for in vivo screening of genes in the immune system. *Nat Commun* **10**, 1668 (2019). <https://doi.org/10.1038/s41467-019-09656-2>
- 19 Corces, M. R. *et al.* An improved ATAC-seq protocol reduces background and enables interrogation of frozen tissues. *Nat Methods* **14**, 959-962 (2017). <https://doi.org/10.1038/nmeth.4396>
- 20 Li, H. *et al.* The Sequence Alignment/Map format and SAMtools. *Bioinformatics* **25**, 2078-2079 (2009). <https://doi.org/10.1093/bioinformatics/btp352>
- 21 Zhang, Y. *et al.* Model-based analysis of ChIP-Seq (MACS). *Genome Biol* **9**, R137 (2008). <https://doi.org/10.1186/gb-2008-9-9-r137>
- 22 Robinson, J. T. *et al.* Integrative genomics viewer. *Nat Biotechnol* **29**, 24-26 (2011). <https://doi.org/10.1038/nbt.1754>
- 23 Lun, A. T. & Smyth, G. K. csaw: a Bioconductor package for differential binding analysis of ChIP-seq data using sliding windows. *Nucleic Acids Res* **44**, e45 (2016). <https://doi.org/10.1093/nar/gkv1191>
- 24 Amemiya, H. M., Kundaje, A. & Boyle, A. P. The ENCODE Blacklist: Identification of Problematic Regions of the Genome. *Sci Rep* **9**, 9354 (2019). <https://doi.org/10.1038/s41598-019-45839-z>
- 25 Chen, Y., Lun, A. & Smyth, G. From reads to genes to pathways: differential expression analysis of RNA-Seq experiments using Rsubread and the edgeR quasi-likelihood pipeline. *F1000Research* **5**, 1438 (2016). <https://doi.org/10.12688/f1000research.8987.2>
- 26 Yu, G., Wang, L.-G. & He, Q.-Y. ChIPseeker: an R/Bioconductor package for ChIP peak annotation, comparison and visualization. *Bioinformatics* **31**, 2382-2383 (2015). <https://doi.org/10.1093/bioinformatics/btv145>
- 27 Team BC & Maintainer BP. TxDb.Mmusculus.UCSC.mm10.knownGene: Annotation package for TxDb object(s). *R package version 3.4.7* (2019).
- 28 Carlson, M. org.Mm.eg.db: Genome wide annotation for Mouse. *R package version 3.8.2* (2019).
