# Supplementary material for: CRISPR screens reveal neuropeptide signaling orchestrates T helper cell differentiation
Source: Research Square preprint supplement (doi:10.21203/rs.3.rs-1953978/v1), 2022-08-16
Supplement: Supplementary file 3 [file 47894d9cb58fae4562da3f17.xlsx]

## Sheet: CGRP
seqnames

## Sheet: Vehicle
seqnames

## Sheet: Figure6H_peak_info
seqnames
