# Supplementary material for: CRISPR screens reveal neuropeptide signaling orchestrates T helper cell differentiation
Source: Research Square preprint supplement (doi:10.21203/rs.3.rs-1953978/v1), 2022-08-16
Supplement: Supplementary file 4 [file 79ea2e6ab3df4aa9333ed2fb.xlsx]

## Sheet: Th1
Gene names	Kmeans_cluster
Gm9705	1
Itgb7	1
Lrrn4cl	1
Tlr9	1
Gpr111	1
Slc15a1	1
Gata1	1
Wls	1
Gm1647	1
Zfp362	1
Mdm4	1
Ptpru	1
Sytl1	1
5730488B01Rik	1
Fcgr4	1
Rfx3	1
Tmprss13	1
Cd46	1
Gpr3	1
4921530L18Rik	1
0610038L08Rik	1
Ccno	1
Slc25a25	1
Oas1b	1
Capn3	1
Tmem86a	1
Gm20257	1
Map4k2	1
Arhgdib	1
Cd200r1	1
R3hdm4	1
Slc23a1	1
Opn1sw	1
Acaa1b	1
Man1c1	1
Zscan2	1
Ifi44	1
Gm15417	1
Cd244	1
Smarca2	1
Isoc2b	1
Gm10560	1
Treml4	1
Naif1	1
Shf	1
Epb4.1l3	1
Ccl21a	1
5730480H06Rik	1
Cpe	1
Lrrc10	1
Pira6	1
Ly6g6c	1
Sp6	1
Gm5086	1
Sema3d	1
Plvap	1
Pisd-ps3	1
Hck	1
Phlda2	1
Zfp616	1
Lrp12	1
Mrvi1	1
Tiam2	1
Gm19589	1
Clp1	1
Art2a-ps	1
Prdm8	1
Rdh5	1
Tfap2e	1
Epg5	1
Lrrc27	1
Hint2	1
Gsta3	1
Rassf2	1
Sh3kbp1	1
Iqcd	1
Jund	1
Haus2	1
Vpreb3	1
Wbscr27	1
Klf9	1
Amn	1
Airn	1
Stk10	1
Slc7a2	1
2510009E07Rik	1
Idua	1
Tubb1	1
Ptger1	1
Emc9	1
Gstk1	1
Ccdc171	1
Ptgs2	1
Aurkc	1
Gna14	1
Icosl	1
Gapt	1
Arhgef4	1
Mfge8	1
Ppp4r1l-ps	1
Serpinb10	1
Clec1a	1
Synj2	1
St7l	1
Lilra5	1
H2-M3	1
Gm4498	1
Mapk10	1
Six3	1
Golga4	1
Plcl2	1
Lair1	1
Psap	1
Klhl17	1
Tnfaip3	1
Kifc2	1
Ccs	1
Igsf6	1
Mpo	1
9330151L19Rik	1
Rab11fip2	1
Trf	1
1300002K09Rik	1
Gm4220	1
Prkcq	1
1600014C10Rik	1
Cacnb1	1
Gm4956	1
Gm14378	1
Cldn13	1
Herpud1	1
Dpcr1	1
Hc	1
Acot2	1
Chrm3	1
Ncor1	1
Scube1	1
Dtx3	1
Slc18a1	1
Ifitm10	1
Arsb	1
Frat2	1
Klhl35	1
Topors	1
Hspa1b	1
Pdgfrl	1
4930538K18Rik	1
Efcab9	1
Ccdc170	1
Slc25a45	1
Tob2	1
Acp5	1
2810408A11Rik	1
Spata2	1
Gm16998	1
Nup50	1
Hist1h4m	1
Gm3435	1
Pdxk-ps	1
Ppp1r12b	1
Sync	1
Cdon	1
Ldhb	1
Tmem63a	1
Zfp579	1
Adamts17	1
Letm2	1
B930059L03Rik	1
Slc16a5	1
Ciita	1
Mlycd	1
Sardh	1
Pcp4	1
Ttyh2	1
H2-T22	1
Ccdc162	1
Sash1	1
Il5ra	1
Smim5	1
Trim34b	1
Gm16982	1
Phc3	1
Gpatch2	1
Mmp9	1
S100a16	1
Aven	1
Cdh5	1
Dnajb1	1
Glt8d2	1
Lrrc8c	1
Sirpb1a	1
Cfb	1
Antxr2	1
C1qb	1
Cxcr4	1
Tmem176b	1
Arid3b	1
Nxnl1	1
Gfra2	1
Myo6	1
Dntt	1
Armc3	1
Plcb2	1
Csf1r	1
Gm16796	1
Gm711	1
Clec10a	1
Gm10791	1
Adam11	1
F5	1
Ccdc158	1
Mn1	1
Gpx2-ps1	1
5031425F14Rik	1
Gm13276	1
Rnd3	1
Cd300lf	1
Rgcc	1
Srms	1
Mettl7a1	1
Scimp	1
Hoxa1	1
Ldb1	1
Eya1	1
Olfr99	1
Tchp	1
Smcr7	1
Slfn5	1
Epm2aip1	1
Dapl1	1
Tor1aip2	1
Sox18	1
Gm7977	1
Hexim1	1
Robo1	1
Csf3r	1
Gpr15	1
Tspan32	1
Twf2	1
Loxl3	1
Rasgrp4	1
Bcl11b	1
E230016M11Rik	1
Arhgef33	1
Rcbtb2	1
Laptm5	1
Bin2	1
Irs2	1
Afp	1
Scfd2	1
Ano8	1
Acap1	1
AW011738	1
A530099J19Rik	1
2900076A07Rik	1
Tmem26	1
Nudt16	1
Llgl2	1
Mtss1l	1
Pla2g2d	1
Ap3d1	1
Gcc1	1
Dgkd	1
Itpr3	1
Fam69c	1
Gm11648	1
Cd200r4	1
Wdr91	1
A730020E08Rik	1
Akap8l	1
Mamld1	1
Htra3	1
Rab38	1
2010310C07Rik	1
2310042E22Rik	1
Fgfbp3	1
Def6	1
Clec4a1	1
LOC100038947	1
Cxcl1	1
Stk11ip	1
Ear3	1
Fzd5	1
Setdb2	1
Olfr1129	1
Ovgp1	1
Hist2h2be	1
Kcnc1	1
P2ry13	1
Angptl1	1
Pira7	1
Trim67	1
Tex22	1
Xylt2	1
Arrb2	1
Zfp521	1
Igfbp4	1
I830077J02Rik	1
Rapgefl1	1
Tnk2	1
Klk1	1
Trim72	1
Afmid	1
Rnf43	1
Phyh	1
Bphl	1
Smg8	1
Syk	1
Cdc42ep3	1
Hoxa4	1
Fam193b	1
Acsm1	1
Msr1	1
Il17rb	1
Plat	1
Vamp5	1
Try4	1
Rere	1
Cald1	1
Ihh	1
Gm973	1
Clip1	1
Mtag2	1
Chst13	1
Gas7	1
Olfr543	1
H2-Oa	1
Cyp4f16	1
Cd209b	1
Rtn4rl1	1
Nox1	1
Adam1a	1
Mrgpra3	1
Rtn1	1
Rgl2	1
Itgam	1
Hist1h4j	1
Hmg20a	1
Sp5	1
Oas1a	1
Mafb	1
Ppp1r27	1
Pik3cg	1
Tbc1d10c	1
Ccl21b	1
Rasl10a	1
Acvrl1	1
Phf11a	1
Chn2	1
Adra2a	1
Hba-a2	1
Alox5	1
Gm13304	1
Arpp21	1
Bcas3	1
Tha1	1
Bcr	1
Myo5c	1
Kif21b	1
Amy2a5	1
1700001J11Rik	1
Prtn3	1
Tcta	1
4930404I05Rik	1
Zfp622	1
Fcna	1
Serpina9	1
Enpp5	1
Prr5l	1
Pglyrp2	1
Gm15471	1
Amica1	1
Ampd1	1
Efcab4b	1
Tmc6	1
Parp10	1
Ap3m2	1
Tuba3b	1
Dtx2	1
Adam6b	1
Baiap3	1
Pcolce	1
Ptch1	1
Btc	1
Hspa1a	1
Slc22a5	1
Ctsg	1
Dguok	1
Tktl1	1
Sirt7	1
Zfp777	1
Gpr114	1
Sgms1	1
9430023L20Rik	1
Lbx2	1
Nlrc3	1
9230116N13Rik	1
Ikbkb	1
B3gnt6	1
Spaca1	1
Chgb	1
0610031J06Rik	1
Tctex1d4	1
Lilra6	1
Sh2d3c	1
Zkscan4	1
E130215H24Rik	1
Ttf1	1
Tbc1d22b	1
Lman1l	1
Sh2d4b	1
Ficd	1
Rmnd5b	1
Spdya	1
Tmem104	1
Gm8909	1
Lypd3	1
Gtf2b	1
Mdp1	1
C130021I20Rik	1
Lrrc48	1
Med26	1
Mef2b	1
Vps18	1
Rasal3	1
Ubald1	1
Bank1	1
Gpd1	1
1810062G17Rik	1
Ctsa	1
Hspb2	1
Foxq1	1
Amer2	1
H2-DMb1	1
4931406P16Rik	1
Gltscr1l	1
Fgd2	1
9030404E10Rik	1
Msantd1	1
Zbtb7a	1
Als2cl	1
4933417D19Rik	1
Dnahc8	1
Maff	1
Phf11d	1
Klra22	1
Klre1	1
Gp5	1
Ing2	1
Cnr2	1
Art2b	1
Aldh1a1	1
Ctso	1
AI316807	1
Arg2	1
Klf11	1
Rgs2	1
Trim34a	1
Elf4	1
Gpr183	1
Hk3	1
Cd72	1
Tgfbi	1
Lefty1	1
Gal3st1	1
Mast1	1
Gm5129	1
Sapcd1	1
Cdk14	1
Daf2	1
Zfr2	1
Pla2g4b	1
Cd300a	1
Klra8	1
Sirpb1b	1
Slc40a1	1
Dync1h1	1
St6galnac1	1
Ctsd	1
Ace	1
Zfp12	1
Rap1gap2	1
Serpinh1	1
Pycard	1
Oas2	1
Ranbp3l	1
Itgb3	1
Actrt3	1
Apol10b	1
Gucd1	1
Padi2	1
Adrbk1	1
D4Wsu53e	1
Gm6537	1
Flt3	1
Sptan1	1
Hmga2-ps1	1
Mphosph9	1
Cpeb2	1
Hid1	1
Itgae	1
Igflr1	1
Scaper	1
Rasgrf2	1
Triobp	1
Actn2	1
B3gnt7	1
Oplah	1
1600010M07Rik	1
BC051142	1
Parg	1
Zfp687	1
Emr1	1
Baiap2l2	1
Ifnz	1
Mta3	1
Cd209f	1
Crisp3	1
C1qc	1
Adcy6	1
Tspan9	1
Cecr5	1
BC051537	1
Ggt5	1
Tspo	1
Adamts14	1
Galnt10	1
Sbspon	1
4933427G17Rik	1
Pik3r3	1
Gm13279	1
Lgi4	1
3830408C21Rik	1
Bhlhe41	1
Gpr85	1
Ppp1r14a	1
Pde9a	1
Herc2	1
Ttc38	1
2310047M10Rik	1
Abcg3	1
Abhd15	1
Art3	1
Dand5	1
Armc5	1
Agmo	1
Comp	1
Snai1	1
Prr12	1
4930562F07Rik	1
Cd5l	1
Pkd1	1
Sik1	1
Tatdn2	1
Camkk1	1
Kcnh3	1
BC147527	1
Glis1	1
Ttc7	1
Acpl2	1
Cstad	1
Map7	1
Foxo3	1
Pnma1	1
Ebag9	1
Kcnj13	1
0610009L18Rik	1
Ccdc92	1
Pygm	1
Hist3h2ba	1
Ppp1r3f	1
Pik3cd	1
Arrdc1	1
1810034E14Rik	1
Cdh24	1
Cbr1	1
Zcchc14	1
Cotl1	1
Chad	1
Obscn	1
Bmf	1
Igf2as	1
Ccdc164	1
Sorl1	1
Cd209c	1
A430088P11Rik	1
Lrrc29	1
Hs3st1	1
Rusc1	1
Cd33	1
Sidt1	1
Cbll1	1
Tecpr1	1
Prickle3	1
Fam222a	1
Mx2	1
Dok3	1
Rbm15	1
Hist1h2an	1
Fam35a	1
Zbtb10	1
Arhgef1	1
Tpcn1	1
Anks3	1
Tnfrsf17	1
A530072M11Rik	1
1810046K07Rik	1
1700001J03Rik	1
Shisa6	1
Atl1	1
Gm8693	1
Gp1bb	1
1810062O18Rik	1
Morc1	1
Sumf1	1
Sh3pxd2a	1
Mxra8	1
Cd200r3	1
Gpr157	1
1810033B17Rik	1
Hist2h2ab	1
Klhl36	1
Htra4	1
Lancl1	1
Ntng2	1
Slc45a4	1
Dlg5	1
Nsun3	1
Dnajb4	1
Sgca	1
Slc28a2	1
Stim1	1
Fam186b	1
Slc14a1	1
Trem1	1
2021-09-06	1
Crtc2	1
H2-T24	1
Fam209	1
Arhgef37	1
Degs2	1
Slamf8	1
Cyp27a1	1
Cnnm2	1
Btbd11	1
Flt3l	1
Igbp1	1
Car3	1
Rab11fip1	1
Trim26	1
Asphd2	1
Gm16157	1
Gm1987	1
Pltp	1
Olfml3	1
Gabrr2	1
Igfbp6	1
Gdf15	1
Flnb	1
Dbp	1
Lonp2	1
Ylpm1	1
Rnf180	1
Pcdhga1	1
Hsh2d	1
Il17re	1
Unc80	1
Rcsd1	1
Thra	1
5830418P13Rik	1
Lasp1	1
Stx1a	1
Rasl11b	1
Tmem241	1
Fmnl2	1
Cd1d2	1
Paqr7	1
Cnn2	1
Itprip	1
Il27ra	1
Epb4.1l1	1
Cacna1e	1
Nyx	1
Ms4a3	1
Cr2	1
Fam46b	1
Rab3d	1
Cd177	1
Gramd1c	1
Itgb2l	1
Zfp142	1
Dgkq	1
Gm8221	1
Klhl15	1
Hes5	1
Prkacb	1
Aoah	1
Fhdc1	1
Fam21	1
Klhl4	1
Rreb1	1
2900079G21Rik	1
Sema5a	1
Lpl	1
Gpt	1
Ntn5	1
Angptl7	1
Rac2	1
Hoxa5	1
BC031361	1
Ddx17	1
Traf3ip2	1
Otud1	1
Pid1	1
Rnf32	1
Tox3	1
Nav1	1
Nrarp	1
Cldn1	1
Adamts10	1
Fbxl8	1
Ccl7	1
Ankrd9	1
Pcbd1	1
Msl2	1
Pabpc1l	1
Shcbp1l	1
Rgs17	1
Iqsec1	1
Plce1	1
Cldn23	1
Mppe1	1
Carns1	1
Gal3st2	1
Ggt1	1
Hrh2	1
Efnb3	1
Hey1	1
Lcn2	1
Fcrl5	1
Ikzf1	1
9430083A17Rik	1
3230401D17Rik	1
Asprv1	1
Cd300ld	1
Cyth4	1
Lrg1	1
Ano6	1
Mogat1	1
Dzip1	1
Gm19710	1
Dennd1c	1
Ubqln2	1
Dcaf8	1
Plk1s1	1
Ampd3	1
Ubc	1
Gzmc	1
Loh12cr1	1
Esr1	1
Prkdc	1
Odf3b	1
Thap3	1
Cldn15	1
Apol8	1
Gm2022	1
G630090E17Rik	1
Ptgs1	1
Mid1	1
Slc22a13b-ps	1
Dtx1	1
E030018B13Rik	1
Aldh3b1	1
Fbxw4	1
Nudt14	1
Gm129	1
Cxx1b	1
Slc4a1	1
Fgf18	1
E130102H24Rik	1
Mocs1	1
Nxpe3	1
Abr	1
Dock2	1
Nfam1	1
Klrg1	1
Scand1	1
5830416P10Rik	1
Ephb3	1
Adck2	1
Fam161a	1
S100a4	1
Polr3gl	1
Hs3st3a1	1
Apol9b	1
Hmgcs2	1
Arid1a	1
Hspa12a	1
Atp2a3	1
Uba7	1
Gltscr1	1
Mgst2	1
Coro1a	1
Klf10	1
Ppap2b	1
Pi16	1
Hist3h2a	1
D8Ertd82e	1
Acoxl	1
Ascc1	1
9330020H09Rik	1
Gm13363	1
Agphd1	1
Mafk	1
Ramp1	1
Zfp574	1
Adam1b	1
Dock8	1
Gm19522	1
Dido1	1
Bmx	1
6330416G13Rik	1
1700017B05Rik	1
Csrnp1	1
Prss30	1
Slc35d2	1
H2-Ke6	1
Col11a2	1
4933432I09Rik	1
Arhgap44	1
Trp53i13	1
Ica1l	1
Fzd4	1
Pnck	1
Gon4l	1
Lypd6b	1
5430435G22Rik	1
Gtf2i	1
Hpgd	1
Wscd2	1
4931414P19Rik	1
Tlr4	1
Gm4179	1
Slc36a1	1
Tada2b	1
Mmrn2	1
Cited2	1
Zc3h3	1
Hgfac	1
Trappc12	1
Ssh1	1
Abca7	1
Cdo1	1
Jun	1
Psd3	1
Dppa2	1
Usf2	1
Zfp952	1
Foxo1	1
Gm10046	1
Ccsap	1
Mefv	1
Ptch2	1
Vmn2r70	1
5830416I19Rik	1
Mboat4	1
Tlr8	1
Mpp1	1
Bbs9	1
Lrig2	1
Blvrb	1
Spty2d1	1
Slc41a3	1
Dctn6	1
2310042D19Rik	1
Fam212a	1
Ptcd1	1
Pcdhgb6	1
Zkscan7	1
Capn11	1
Gm10409	1
1810012K16Rik	1
Whamm	1
Etohd2	1
She	1
Smc6	1
Klrb1c	1
Fem1c	1
Zfp819	1
Fcgrt	1
Tmem191c	1
Zfp467	1
Psmb10	1
Gsdmd	1
Osbpl7	1
Klhdc1	1
Gm9047	1
Gm11837	1
Pkp3	1
Dbx1	1
Fibcd1	1
Slc3a1	1
Abhd8	1
4930428O21Rik	1
Cybrd1	1
Grk4	1
Zfp651	1
Aldh1b1	1
Tigd5	1
Bai2	1
Zbtb21	1
Rfx2	1
Tbxas1	1
Cd180	1
Grina	1
Atxn2l	1
Gucy1b2	1
Gm10591	1
Ephb2	1
Mlxipl	1
Dusp8	1
C5ar1	1
Thsd1	1
Pld4	1
Acad10	1
Atp1a3	1
Elmo3	1
E530011L22Rik	1
Pax5	1
Slc6a20a	1
Tbx6	1
Zscan10	1
Map2k6	1
Crb2	1
Cacna1i	1
Abl1	1
Bex6	1
Zmat1	1
Camk2b	1
Hspa1l	1
Gm14685	1
Atp8b2	1
Gm21541	1
Eepd1	1
5430425J12Rik	1
Mmp25	1
1700019B03Rik	1
Cpm	1
Igfals	1
Dennd1a	1
Ppp1r9b	1
B3galt2	1
Olfr1300-ps1	1
Omd	1
Klhl5	1
Raly	1
Ccl21c	1
9430091E24Rik	1
2021-09-01	1
1110028F11Rik	1
Pcsk7	1
Zmynd11	1
Cmpk2	1
Mpeg1	1
Gm19897	1
0610040J01Rik	1
Fosb	1
Uvrag	1
Fchsd2	1
Sfn	1
Izumo4	1
1700122O11Rik	1
Cbx8	1
Eva1c	1
Serpinb6c	1
Rasgrp1	1
Pear1	1
Atp6v0a2	1
Izumo1	1
Nod1	1
2700086A05Rik	1
Tspyl1	1
Mex3c	1
Golga5	1
Hexa	1
Chrne	1
Oas1c	1
H2afy3	1
Clec1b	1
Eya2	1
Fhod1	1
BC021785	1
Flt1	1
Dnmbp	1
Klf15	1
E130317F20Rik	1
Syne2	1
Col7a1	1
Elane	1
C6	1
Il22ra2	1
Cideb	1
Lrch4	1
Msmp	1
Rhob	1
Dcn	1
C1qa	1
Rab37	1
Kcnj14	1
Itpk1	1
Ganc	1
Arc	1
Zfp182	1
Pik3r5	1
Rasd1	1
H2-Q8	1
Cyp1a2	1
Fos	1
Matk	1
Mertk	1
Nxnl2	1
Mob3b	1
Ccdc117	1
Sorcs2	1
Myo1f	1
Sox8	1
Slc2a9	1
Tinagl1	1
Sirpa	1
Ehd3	1
Klra15	1
Myadml2	1
Rcn3	1
Tln1	1
Tsc22d4	1
Gm13277	1
Col23a1	1
Tas1r1	1
Timm8a2	1
Fam110a	1
Gmip	1
Slc1a3	1
Emilin1	1
Fmnl1	1
Gm20605	1
Ephb6	1
Lrrc25	1
Cntn1	1
Disc1	1
Bambi	1
Zfand2a	1
Mag	1
Zfp457	1
Grm6	1
Rnf113a2	1
Klf4	1
Nedd9	1
C2	1
Myh9	1
Tbx2	1
Errfi1	1
Tmem52	1
Acyp1	1
Catsperd	1
Nap1l5	1
Ppp6r1	1
Junb	1
Flna	1
Amy1	1
Pddc1	1
Bag3	1
Mtss1	1
Cat	1
AA414768	1
Arhgef18	1
Rapgef4	1
Alox15	1
Cbx4	1
Gm10731	1
Cyp39a1	1
Gm6568	1
Mmp8	1
Scn11a	1
Abhd14b	1
Klk7	1
Stap2	1
Scg5	1
Podnl1	1
Hal	1
Arl4d	1
Lysmd1	1
Dact1	1
Ubac2	1
Dnajc14	1
Abcd2	1
Myo9b	1
Sbk2	1
Dtnb	1
Cabin1	1
Trpv4	1
Limk2	1
Dok2	1
D6Ertd527e	1
L1cam	1
4930426L09Rik	1
Cnp	1
Slc26a11	1
Numa1	1
Ddrgk1	1
Arhgap4	1
Exd2	1
Msl1	1
Rgs14	1
Vmn1r118	1
Tmem220	1
Ctrb1	1
Lbp	1
4933431E20Rik	1
Sntb2	1
Tet1	1
Kcnk18	1
Myl9	1
Ciz1	1
Cacna2d4	1
Cd300e	1
Retnlg	1
Zfp831	1
Slc9a3r1	1
Tagap1	1
Atm	1
Atg12	1
Camta2	1
Gas5	1
Kcnrg	1
Zfhx2	1
Ptprn	1
Scrt1	1
Aes	1
Gm10125	1
Emid1	1
Cfp	1
Tnfsf13	1
Tnrc18	1
Tox4	1
Cyp4f18	1
Rnf39	1
Cdh13	1
Gm5124	1
Cep164	1
Zbtb24	1
Lilrb3	1
Fyco1	1
Szt2	1
Itgb1bp2	1
Rhd	1
Dhx9	2
Rnf115	2
Plekhn1	2
Rgl1	2
AF251705	2
Rhag	2
Cyp3a57	2
Gm1821	2
Gtpbp1	2
Zfp386	2
AW549877	2
Rad54l2	2
Zyg11b	2
Man1a2	2
Ddx26b	2
Ube2d2a	2
Rell1	2
Gm6583	2
Smg5	2
Jmy	2
Fcnb	2
Pdcd10	2
B630019K06Rik	2
Ear2	2
F10	2
Igfbp5	2
Zfp943	2
Cd209a	2
Kif1b	2
Terf1	2
Fbxo34	2
Iws1	2
Gm13826	2
Reck	2
Dscaml1	2
4921525B02Rik	2
N4bp2l2	2
Crbn	2
Klk1b27	2
Ulk1	2
Foxd2	2
Mrgpra2a	2
Sap30l	2
Hmgn5	2
4930528A17Rik	2
Hpgds	2
Spata13	2
Gm166	2
4933427E11Rik	2
Rab3il1	2
Ccdc142	2
Zdhhc7	2
Gpr155	2
Atxn3	2
Gmpr	2
Arhgap32	2
Zbed6	2
Alox8	2
Rnf149	2
Aqp5	2
Fam167a	2
Csf2rb2	2
Sec62	2
Tmem8b	2
Rab35	2
Tmem25	2
Apc	2
Cd101	2
Ikzf2	2
Mob1a	2
Btd	2
Usp6nl	2
Tsc1	2
P2ry10	2
Nfe2	2
Vaultrc5	2
Phf8	2
Mgat4a	2
Fam134c	2
Tmem50b	2
Nlrp3	2
I730030J21Rik	2
2810454H06Rik	2
Cdk12	2
Klra17	2
Syt13	2
Pik3c2a	2
Arih1	2
Klhl2	2
Tlr2	2
Diap2	2
Ube2e3	2
Rhobtb2	2
Epb4.2	2
Sh3tc1	2
Pp2d1	2
Nav2	2
Cir1	2
Cep97	2
Pik3ca	2
Phf2	2
Nxpe5	2
Abi1	2
Nedd4l	2
Auts2	2
Sostdc1	2
2510039O18Rik	2
Areg	2
Il8	2
Kctd12	2
Acpp	2
Rab18	2
Vcpip1	2
Scn4a	2
Nrp2	2
Ndufa6	2
Azi2	2
Gpr141	2
D930016D06Rik	2
Ubn1	2
Trpm7	2
Dstyk	2
Dhx8	2
Bod1l	2
BC016423	2
Zfp51	2
Abcb1a	2
Tshz1	2
Ctnnd2	2
Abca5	2
Khdrbs1	2
AI607873	2
Trappc10	2
Lyn	2
Gm590	2
Trcg1	2
Hnrpdl	2
Spag6	2
Rnf145	2
Mageb18	2
Rchy1	2
Tmem87a	2
Prss53	2
Rundc3b	2
Tnks	2
Art4	2
Cdc40	2
Frs2	2
Mapk9	2
Zranb1	2
Usp25	2
Pgap1	2
Klra33	2
Spred2	2
A430071A18Rik	2
Boll	2
Zfp382	2
Epcam	2
Cpa3	2
Tlk1	2
Terc	2
Gclc	2
Pnpla8	2
Btg3	2
G3bp2	2
Pgr	2
Cpne5	2
Lpin2	2
Epas1	2
Cpb1	2
Tmsb15b1	2
Polg2	2
Igsf3	2
Pmepa1	2
Rin2	2
Pcdh1	2
Zfp58	2
Spon1	2
Cnot4	2
Cerk	2
Adam23	2
4930515G01Rik	2
Ppp1r37	2
Zbtb16	2
Atp6ap2	2
Fgd6	2
Gm19557	2
Ces2c	2
Lphn2	2
Clec4a4	2
Atrn	2
Znrf3	2
Nr2c2	2
Camk2n1	2
Ube2g1	2
Usp9x	2
Nup153	2
Olig3	2
4921511I17Rik	2
Bri3	2
Ppbp	2
Tdh	2
P2ry6	2
Pgm2l1	2
Pfkfb2	2
Cep57	2
Golph3	2
Atxn7	2
Slc26a2	2
Gm11545	2
Trim36	2
Wasf2	2
Ip6k1	2
Ppp2r2d	2
Stx19	2
Slfn14-ps	2
Gpr22	2
Erp27	2
Fcho2	2
4732471J01Rik	2
Tnrc6a	2
Pard6g	2
Pdpk1	2
Tlr6	2
Smpd5	2
Mbd2	2
Rarb	2
1810026B05Rik	2
Tmsb15l	2
Mip	2
Bmpr2	2
Plekha6	2
Jam2	2
Vasn	2
Reps1	2
Rnft2	2
Wdr37	2
Trim25	2
Kctd6	2
Csnk1d	2
Nipal3	2
Rcan3	2
Pdzd2	2
Mmp15	2
Klhdc8b	2
Npff	2
Fam160b1	2
H3f3a	2
Map2k4	2
Slc23a2	2
Pcmt1	2
Nup98	2
Zfp366	2
Lsm14a	2
Neat1	2
Plekhh3	2
Dnajc12	2
Plin1	2
Fam131a	2
Cd164	2
Akap14	2
Tceal1	2
Slc22a17	2
Proca1	2
Kif13b	2
Spo11	2
Slc6a19	2
Sh3bgrl2	2
Cep135	2
Chd1	2
Gxylt1	2
Kpna1	2
Nfe2l3	2
Slc30a1	2
Mtmr12	2
Qser1	2
Pdzd9	2
Gm4832	2
Rbm33	2
Gpbp1	2
4933421O10Rik	2
Ahdc1	2
Grm8	2
Gm5547	2
Dync1li2	2
Mknk2	2
Rsf1	2
Ppp3ca	2
Itgax	2
Gprasp1	2
Raver2	2
Sec1	2
Ssh2	2
4930486L24Rik	2
Syn2	2
Gm17066	2
Car1	2
Camsap2	2
C1galt1	2
Lactbl1	2
Trappc8	2
Zfp39	2
Insl3	2
Qk	2
Rasa1	2
Smcr8	2
Tm2d2	2
Kctd10	2
Ralgps2	2
Usp7	2
Prrc2c	2
Igf2r	2
Sema6c	2
Adnp	2
Zfp644	2
Naip2	2
Zfp383	2
Mmp11	2
Tmem248	2
Stau1	2
Sos2	2
Hook1	2
Zfp874b	2
Fbxo11	2
Pten	2
Kat5	2
Elovl5	2
Pstpip2	2
Shb	2
Casc4	2
Fan1	2
Wipi1	2
Smc3	2
Fbxw10	2
Bex2	2
Arid1b	2
2810407C02Rik	2
Phlpp1	2
Cnot6	2
Ythdf3	2
Fam131b	2
Zfp68	2
Prpf18	2
Itk	2
Foxj3	2
5031434O11Rik	2
Cmtm6	2
Clta	2
Dnaja4	2
Ube2j2	2
Akirin1	2
Rap1b	2
Lrrc23	2
Slc7a14	2
Ddi2	2
Tmem57	2
Tmem198	2
Xist	2
4930413G21Rik	2
Rassf4	2
A730098P11Rik	2
Cyth3	2
Iqgap2	2
Klrb1f	2
2700081O15Rik	2
Fbxl17	2
Carf	2
Nfatc2ip	2
Col10a1	2
Gm5134	2
Grk5	2
Coch	2
Khdrbs3	2
Zfp677	2
Ddx42	2
Btbd7	2
Zcchc18	2
Bicd2	2
Zhx1	2
Heca	2
Tbc1d4	2
Prss57	2
Camta1	2
Fam3c	2
P2ry12	2
Smarcd3	2
Morf4l1	2
Fmo1	2
Tnks2	2
Rnf103	2
Aktip	2
Klra4	2
Tmem123	2
Clec4a3	2
Plekhg3	2
Camk2a	2
Fgfr1	2
Art5	2
Ccl2	2
Crnkl1	2
Sema4g	2
Cnot1	2
Sesn3	2
H60b	2
5430402O13Rik	2
Fam69a	2
Zfp874a	2
Sec11a	2
Smurf2	2
Cdh1	2
Sfmbt1	2
Vmn2r48	2
Ifitm6	2
Prkaa1	2
Baiap2	2
Pik3c3	2
Prss34	2
Chic2	2
Rbbp8	2
Apc2	2
Frmd4a	2
Ar	2
Rps6ka2	2
Il17rc	2
Fam126b	2
C920006O11Rik	2
Lrit2	2
Avl9	2
Ppp2r5e	2
Pias2	2
Rnf2	2
Ptn	2
Gan	2
Slc2a5	2
Wdfy2	2
Pira1	2
Tmem55b	2
Ptp4a1	2
Phf3	2
Fgf17	2
Mospd1	2
Rab44	2
Megf9	2
Zfp871	2
Smg7	2
N4bp1	2
Nsg1	2
Ppm1l	2
Yaf2	2
2021-03-07	2
Mpzl1	2
Gm2518	2
Napb	2
Phip	2
Tsga10	2
Lrba	2
Erbb2	2
8430403D17Rik	2
Vps13c	2
A630007B06Rik	2
Tbcel	2
Rassf3	2
Fam102b	2
Hist4h4	2
Tcp11	2
Nck1	2
Lrch3	2
Kdm5a	2
Klhl18	2
Tiprl	2
Rc3h1	2
Grap2	2
Nanos1	2
A430035B10Rik	2
Kras	2
Eif4ebp2	2
Tnfrsf23	2
Rhoj	2
Rsc1a1	2
Rab7l1	2
Arl15	2
Map3k7	2
Pcf11	2
Caml	2
Zfp78	2
Brd4	2
Ythdc2	2
Lifr	2
Zcchc11	2
Phf12	2
Pip4k2c	2
Wdfy4	2
Casc3	2
Tppp3	2
Vps26a	2
Als2	2
Gm3258	2
Lats1	2
Zfp273	2
Gm14634	2
Slc23a3	2
Krt8	2
Nrip1	2
Ube2b	2
Tbc1d15	2
Tspan14	2
Suox	2
5830411N06Rik	2
4833420G17Rik	2
Commd6	2
Krt19	2
Zfp53	2
Cfh	2
Lpar2	2
Oas1g	2
9930021J03Rik	2
Epc2	2
Pnoc	2
Cxadr	2
Kdm3b	2
Hadhb	2
Tgfbr3	2
Atp1b2	2
Rock1	2
Ces2d-ps	2
Wnt4	2
Usp38	2
Brpf1	2
Ankrd50	2
Tm4sf1	2
Oxr1	2
Zbtb5	2
Uqcrh	2
Shprh	2
Rab2a	2
Clec5a	2
Arhgap5	2
Rab4a	2
Mtmr10	2
Ppp4r2	2
C030046E11Rik	2
Tceal3	2
Spag9	2
Sh3d19	2
Serpinb8	2
Nexn	2
Ddx3x	2
2210018M11Rik	2
Lemd3	2
BC051226	2
Smad4	2
Scgb3a1	2
Bmp2k	2
Pifo	2
Cdkn2b	2
Nfyc	2
Usp12	2
Sos1	2
Dtx4	2
Vezf1	2
Phactr4	2
Arl11	2
Armcx5	2
Vmn2r51	2
Ddx43	2
Cgn	2
Kctd12b	2
Slc35e2	2
Rsrc2	2
Esyt2	2
Abhd13	2
Dgke	2
Zfp319	2
Dicer1	2
Zc3h13	2
Pot1b	2
Nrip3	2
Usp42	2
Setd7	2
Vapa	2
H2-M2	2
Sumo1	2
Ube2j1	2
Jmjd1c	2
Dip2b	2
Tmem86b	2
Clock	2
Akap17b	2
Gabpa	2
Rprd2	2
Pde3b	2
Crkl	2
Ptafr	2
Agap1	2
Riok1	2
Actr10	2
Sap25	2
Rassf8	2
Gatad2b	2
Ccdc146	2
Egfl8	2
Sfmbt2	2
Aldh1a3	2
Crk	2
Olfr1373	2
Slc25a21	2
Tmcc3	2
Zfp655	2
Zfp607	2
Cpsf7	2
Htatsf1	2
Sag	2
Olfm4	2
Klhl29	2
Nnat	2
Zfx	2
AA543186	2
Ugcg	2
Sub1	2
Tex38	2
Dapk1	2
Kmo	2
Bcl2l11	2
Kel	2
Hist1h4h	2
Scaf8	2
Prkag1	2
Ifrd1	2
Dmxl1	2
1700034P13Rik	2
Acin1	2
Aftph	2
D3Bwg0562e	2
Ahctf1	2
Rev3l	2
Pitx2	2
Hmbox1	2
Clint1	2
Gse1	2
Siglece	2
Serpini1	2
Plcl1	2
Tmem194b	2
Esco1	2
Sacs	2
Klra18	2
Bfsp2	2
Gm16897	2
Glipr1	2
Rmnd5a	2
Ppm1d	2
Tmod4	2
Ypel2	2
3300002I08Rik	2
Trim10	2
Slc9a1	2
2610528A11Rik	2
Clec4a2	2
Pi4kb	2
Tram2	2
Gm15401	2
Pygo2	2
Samd14	2
Loxl4	2
Serpind1	2
Zfp809	2
Med13	2
Uhmk1	2
Zeb1	2
Erbb2ip	2
Setmar	2
Rbm18	2
Ppil4	2
Ctr9	2
Grb2	2
Pik3cb	2
Zbtb11	2
1110032A03Rik	2
Ell	2
Wapal	2
Tmem59	2
Csrp1	2
Skil	2
Rbpms	2
E230008N13Rik	2
Gcc2	2
Plekhm1	2
Zhx3	2
Tbl1xr1	2
Tlr13	2
Tmx4	2
Top3a	2
Capza2	2
Zfp146	2
Ip6k2	2
Tspan15	2
Safb	2
Rnf139	2
Smad6	2
Rabep1	2
Ncoa6	2
5430421N21Rik	2
Gm16853	2
Plag1	2
Marco	2
Aff4	2
A530088E08Rik	2
Xiap	2
Plscr4	2
2610206C17Rik	2
Fbxo33	2
Aff1	2
1110020A21Rik	2
Cul3	2
Gm10814	2
Unc5b	2
Notch4	2
Zfp758	2
1700105P06Rik	2
2410089E03Rik	2
Endou	2
Taf4b	2
Smim1	2
Map3k10	2
Taf15	2
Wdr82	2
Slc16a4	2
Ttyh1	2
Gls	2
Il18	2
Tbk1	2
Hist3h2bb-ps	2
Brsk2	2
Cramp1l	2
Wac	2
Tmem64	2
Pilra	2
Cldn4	2
Mob4	2
Srp9	2
Rtn4r	2
Dhx40	2
Rbm27	2
Pfn2	2
Spsb1	2
Cebpa	2
Trak2	2
5730508B09Rik	2
Inpp1	2
Itga2	2
Tlk2	2
Cnot6l	2
Mast4	2
Bsdc1	2
Ern1	2
Lrrn3	2
Nkap	2
2010111I01Rik	2
4930455C13Rik	2
Cd22	3
Sgk1	3
Atp6v1e1	3
Chi3l3	3
Gm8994	3
Rbbp6	3
Fam117b	3
Malat1	3
Zbtb22	3
2900060B14Rik	3
Eva1b	3
Trim24	3
Ppm1h	3
Rbm25	3
Fam89b	3
Gm5148	3
Zfp688	3
Atp7a	3
Phxr4	3
Sgk3	3
Arl6ip5	3
Rab2b	3
Pld3	3
Ccnl2	3
Clec4d	3
Pqbp1	3
Cux1	3
Zfp236	3
Chd2	3
Xaf1	3
Ly6c2	3
Irak3	3
Tbc1d30	3
Apbb1ip	3
Tsix	3
Pyhin1	3
Zfp668	3
Nacc2	3
Sbk1	3
Zcchc12	3
Ensa	3
Enthd2	3
Zfp281	3
C030034I22Rik	3
2410066E13Rik	3
Usp3	3
Mat2b	3
Cdk19	3
Wdyhv1	3
Znrf1	3
Pcif1	3
Rnf167	3
Zfp276	3
Helz2	3
Adar	3
Zmynd15	3
Fth1	3
Abracl	3
Rnf44	3
Evi2b	3
Fam193a	3
Sipa1l2	3
Samd8	3
Zc3h11a	3
Ralbp1	3
Zfp91	3
Ppp1r13b	3
Ptpn18	3
Ncoa2	3
Ier5	3
Arhgap20	3
Ccdc125	3
Cd79a	3
Tspyl2	3
Tagap	3
Acvr1b	3
N6amt1	3
Svil	3
Cd84	3
Tacc1	3
Ikbke	3
Cyth1	3
2021-09-04	3
Galnt9	3
Ifi27l1	3
[truncated: 12,500 more rows]

## Sheet: Th2
Gene names	Kmeans_cluster
Fignl2	1
A930016O22Rik	1
Wls	1
Ankmy1	1
Gprc5b	1
1700001G17Rik	1
4732491K20Rik	1
Gbas	1
Rfx3	1
Phf11b	1
Itgb2	1
Ccno	1
Slc25a25	1
Oas1b	1
Capn3	1
Arhgdib	1
Lix1	1
Nacc2	1
Tshz3	1
Ifi44	1
Golm1	1
B230216N24Rik	1
Gm10560	1
Gm14137	1
Ear2	1
Zfp276	1
Sema3d	1
Gm4925	1
Tgfb1i1	1
Glis3	1
Cd209a	1
BC024582	1
Ncrna00085	1
Hist1h2ap	1
Tulp4	1
Cspp1	1
Prdm8	1
Ccdc125	1
Acvr1b	1
Epg5	1
Lrrc27	1
Rassf2	1
Sh3kbp1	1
Iqcd	1
Hdac9	1
Jund	1
Ina	1
Wbscr27	1
C030013G03Rik	1
Zfp526	1
Rnf122	1
Stk10	1
2510009E07Rik	1
Idua	1
Sirt1	1
Fam163b	1
Ptger1	1
Scp2	1
BC065397	1
Ryr3	1
Rab3il1	1
Ccr3	1
Lrrc3b	1
Gapt	1
Sh3bgrl3	1
Serpinb10	1
Alox8	1
Plcl2	1
Actr3	1
Ccs	1
Dgkh	1
Igsf6	1
Spice1	1
Tsc22d1	1
Reps2	1
Rab11fip2	1
Akap9	1
Kdm4d	1
Trf	1
Ugt1a5	1
Susd2	1
Ikzf2	1
Gm20300	1
Peg13	1
Gm4814	1
1810026J23Rik	1
Rasgef1b	1
Acot2	1
Dtx3	1
Apol11b	1
Nlrp3	1
Arsb	1
Topors	1
Hspa1b	1
Ccr10	1
Gm11201	1
Slc25a45	1
Acp5	1
4931406H21Rik	1
Ppp1r12b	1
Spsb2	1
Tmem63a	1
Kcnh5	1
Rhobtb2	1
Slc16a5	1
Fam105a	1
Stx2	1
Gm15880	1
Commd8	1
Adrbk2	1
Smim5	1
3110021N24Rik	1
Trim34b	1
Rnf38	1
Rab3ip	1
Themis2	1
Cebpb	1
Mmp9	1
Rpl37a	1
Sox13	1
BC029722	1
Cmah	1
Aven	1
BC037032	1
Cdh5	1
Cradd	1
Lrrc8c	1
C1qb	1
Pdcd4	1
Cxcr4	1
Lrrc66	1
Glyctk	1
Nrap	1
Plcb2	1
Ank1	1
Gm711	1
Pilrb1	1
F5	1
Mn1	1
Rhpn2	1
Gm13276	1
Gm14405	1
Tbr1	1
Fam46c	1
Ugt1a9	1
C1ra	1
Mcmdc2	1
Mkl2	1
Slfn5	1
Tor1aip2	1
Nynrin	1
Tmem35	1
Hexim1	1
Gpr15	1
Tspan32	1
Ankrd7	1
Abcc5	1
Thbs1	1
Lsp1	1
Wnt5b	1
Arhgef33	1
Rcbtb2	1
Bin2	1
Irs2	1
2610027K06Rik	1
Usp25	1
AW011738	1
Vps9d1	1
Palm3	1
Pip4k2a	1
Timd4	1
Gm8979	1
Itpr3	1
Mblac2	1
A930006K02Rik	1
Palld	1
Gramd4	1
Gucy1a3	1
Rab25	1
Ubl5	1
Pcolce2	1
LOC100038947	1
Ear3	1
Ralgapb	1
Setdb2	1
Hist2h2be	1
P2ry13	1
Jag1	1
Gm4980	1
Treml1	1
Xylt2	1
Arrb2	1
I830077J02Rik	1
Afmid	1
Olfr157	1
Olfr1371	1
Syk	1
Olig3	1
Fbxl21	1
Hlf	1
Slc9a7	1
Samd3	1
Msr1	1
Plat	1
Rere	1
Clip1	1
Olfr543	1
Cd209b	1
Trim36	1
Rtn4rl1	1
5430405H02Rik	1
Rtn1	1
Rgl2	1
Tbc1d16	1
4930594C11Rik	1
Hmg20a	1
Mroh2a	1
Lrrc69	1
Pcdhgb4	1
Acvrl1	1
Phf11a	1
Trem3	1
Smpd5	1
Csprs	1
Gm6623	1
Kif21b	1
Mxra7	1
Cacna1d	1
Gm16938	1
Zfp622	1
Enpp5	1
Pglyrp2	1
Ampd1	1
Hdac11	1
Adh1	1
Fam211b	1
3110001I22Rik	1
Prr22	1
Fam134a	1
Mmp15	1
Btc	1
Hspa1a	1
N4bp2	1
Zfp317	1
Usp28	1
Sirt7	1
Nlrc3	1
B3gnt6	1
Ncam1	1
Spaca1	1
4921517D22Rik	1
Celsr1	1
Tceal1	1
Gm3230	1
Tsga14	1
Gcnt7	1
Spo11	1
Ddhd1	1
LOC100503280	1
Tmem8	1
1600023N17Rik	1
B430212C06Rik	1
Ercc4	1
Gtf2b	1
Mynn	1
Cant1	1
Rasal3	1
Ubald1	1
Trim41	1
Pln	1
Ugt1a1	1
Gprasp1	1
Ppdpf	1
Sec1	1
Nacad	1
Gltscr1l	1
2610035D17Rik	1
Ugt1a2	1
Was	1
C1galt1	1
6430548M08Rik	1
Maff	1
Cers1	1
Cnr2	1
Alpk3	1
Art2b	1
Klf11	1
Rgs2	1
Elf4	1
Gm6213	1
Hk3	1
Trim30b	1
4831440E17Rik	1
Kitl	1
Cd300a	1
Sirpb1b	1
Slc40a1	1
Ralgps2	1
Taz	1
Ace	1
Pyroxd2	1
Snhg9	1
Oas2	1
Apol10b	1
Adrbk1	1
Dact3	1
Naip2	1
Cdk2ap2	1
Cpeb2	1
Hid1	1
Igflr1	1
Ssbp2	1
Rasgrf2	1
2021-03-02	1
Axin2	1
B3gnt7	1
Oplah	1
Kcnj16	1
Chrnb2	1
Sesn1	1
Aatk	1
Cecr5	1
Rasgrp3	1
Ggt5	1
Snx29	1
Galnt10	1
Tas1r3	1
Pik3r3	1
Gm13279	1
Fbxw10	1
Sox6	1
Sptssa	1
Fgf13	1
Herc2	1
Myoz3	1
Ttc38	1
Abcg3	1
Dand5	1
Slc6a13	1
Armc5	1
Snai1	1
Prr12	1
2010109I03Rik	1
4921511C10Rik	1
1700058G18Rik	1
Kcnh3	1
Serf2	1
Clec7a	1
BC147527	1
Fst	1
Lrrc23	1
Ttc7	1
Acpl2	1
Foxo3	1
Gm10767	1
Ifit2	1
0610009L18Rik	1
Pygm	1
Uggt2	1
Iqgap2	1
Gm10432	1
Pik3cd	1
Rfxank	1
Vmac	1
Pcdhgb1	1
Gm5134	1
Mex3b	1
Olfr544	1
Arhgap29	1
B430306N03Rik	1
Lrrc29	1
Tecpr1	1
Hbb-b1	1
Zfp36l2	1
Sptbn2	1
Fam222a	1
Prokr2	1
Agrn	1
Gm14548	1
Gm6904	1
Card9	1
Tlr5	1
Emp3	1
Zbtb10	1
Lrrc2	1
Clec12a	1
Taf9b	1
Zfp791	1
Ccr9	1
Hic2	1
Sumf1	1
Clec4a3	1
Cd200r3	1
Ccl2	1
Dcaf11	1
Klhl36	1
Pbxip1	1
Rab33b	1
Zc2hc1c	1
Ppfia4	1
Dnajb4	1
Slc10a1	1
Slc28a2	1
1600016N20Rik	1
Srpk3	1
5430402O13Rik	1
Slc25a27	1
H2-T24	1
Dse	1
Prox2	1
Slamf8	1
BC037034	1
I830012O16Rik	1
Stx16	1
Setx	1
Gabrr2	1
Pex26	1
Utp14b	1
Zfp316	1
Lonp2	1
Grk6	1
F13a1	1
Asic1	1
Pam	1
Cd28	1
Ly9	1
Zscan25	1
Glrp1	1
Bambi-ps1	1
Brdt	1
Thra	1
Zfp619	1
Rasl11b	1
Cd1d2	1
Cnn2	1
Il27ra	1
Prx	1
Epb4.1l1	1
Cacna1e	1
Plcb4	1
Tspan7	1
Celf4	1
Fn3k	1
Itgb2l	1
Trim39	1
Dgkz	1
Zfp142	1
Prkacb	1
Glt28d2	1
Pced1b	1
Eif4a2	1
Ntn5	1
1600029O15Rik	1
Ddx17	1
Dnahc11	1
Lrrc8a	1
Cecr2	1
Arsk	1
A330035P11Rik	1
Pid1	1
Enc1	1
Nrarp	1
Adamts10	1
Trim56	1
2210404O09Rik	1
Cbfa2t3	1
Gm2518	1
Shcbp1l	1
Iqsec1	1
Clcn7	1
Lrba	1
Erbb2	1
Carns1	1
Gal3st2	1
8430403D17Rik	1
Hey1	1
Tbcel	1
Pcdhb22	1
Slc5a11	1
Atp8a2	1
Lcn2	1
Snta1	1
Ikzf1	1
3230401D17Rik	1
Asprv1	1
BC033916	1
Vamp1	1
Fndc9	1
Dennd1c	1
Tob1	1
Vpreb1	1
Dcaf8	1
Cwc25	1
Zfp354c	1
Tcp11	1
Tecta	1
Gzmc	1
Ddb2	1
Gnal	1
Prkdc	1
Top2b	1
Tnn	1
Akna	1
Thap3	1
Apol8	1
A430035B10Rik	1
C230024C17Rik	1
Irf2	1
Dtx1	1
E030018B13Rik	1
Fbxw4	1
Cdk3-ps	1
Prkd2	1
Abr	1
Tifab	1
Nfam1	1
Klrg1	1
Tesc	1
Il1b	1
Zfp710	1
4931431C16Rik	1
Arid1a	1
Ccdc126	1
Med12	1
Hist1h2bn	1
Gltscr1	1
Coro1a	1
Gm14634	1
Sipa1l1	1
Nbeal1	1
AW046200	1
Hist3h2a	1
Zxdb	1
Ksr2	1
Cldn5	1
4932415G12Rik	1
Lef1	1
Acoxl	1
Paqr3	1
Zfp865	1
Gm13363	1
Dync2h1	1
Zfp574	1
Dock8	1
Gm19522	1
Gpr35	1
Rgsl1	1
Cfh	1
Oas1g	1
Ngly1	1
Susd4	1
Mcts2	1
Hoxa3	1
1110006O24Rik	1
Lhx9	1
Fzd4	1
A730017L22Rik	1
5430435G22Rik	1
Gtf2i	1
Hpgd	1
Wscd2	1
Lmo4	1
Tlr4	1
Zfp14	1
Syde1	1
Noxred1	1
Cited2	1
Arhgef26	1
Itga2b	1
Trappc12	1
Rps29	1
Cdo1	1
Cyp4f17	1
Jun	1
Tlr12	1
1700096K18Rik	1
Prrg1	1
Ccsap	1
Csrnp2	1
Herc3	1
Mllt10	1
2310042D19Rik	1
Napsa	1
Dock11	1
Fam212a	1
Ptcd1	1
Jakmip1	1
She	1
Krtcap3	1
Klrk1	1
9930012K11Rik	1
Klrb1c	1
Fem1c	1
Fcgrt	1
Cacnb4	1
Pik3r1	1
Prrt2	1
Mettl23	1
Zfp651	1
Gm16119	1
A730085K08Rik	1
Bin1	1
Rap2b	1
2010002M12Rik	1
Apof	1
Klra7	1
Chmp1a	1
C5ar1	1
Thsd1	1
Ms4a4d	1
Ager	1
Acad10	1
Fam151b	1
Ndrg3	1
Zscan10	1
Mx1	1
Gm13845	1
Zmat1	1
Ssbp3	1
Nlk	1
Lnx1	1
D830046C22Rik	1
1300017J02Rik	1
Agap1	1
Ncor2	1
Itih5	1
Xrn1	1
Rnase4	1
Grcc10	1
Ppp1r9b	1
Slain1	1
Rgs18	1
Sgip1	1
2021-09-01	1
Fam189b	1
Tmcc3	1
Gm19897	1
Traf3ip3	1
Fosb	1
Uvrag	1
Klhl29	1
Ptpra	1
Izumo4	1
Cbx8	1
L3mbtl3	1
Gm10640	1
BC094916	1
Nod1	1
Arhgap26	1
Prkcb	1
Smagp	1
Oas1c	1
Clec1b	1
Eya2	1
Gm13298	1
Ttc39a	1
Dnmbp	1
Sbsn	1
Fbxo9	1
Pde6a	1
Rab37	1
Pitx2	1
Hmbox1	1
Zfp182	1
Mustn1	1
Fos	1
Dlx2	1
Nxnl2	1
Mob3b	1
Sox8	1
1700016K19Rik	1
Tln1	1
Tsc22d4	1
Cdnf	1
Gm9958	1
Elfn1	1
Jpx	1
Gmip	1
Sv2b	1
Gm20605	1
Ephb6	1
Clec4a2	1
Lrrc25	1
Tnfaip2	1
Bambi	1
Zfand2a	1
Rnf113a2	1
Klf4	1
1810011O10Rik	1
Gpr133	1
Aldh3a2	1
Sp110	1
Akap12	1
Tifa	1
Pdzd3	1
Mtss1	1
Osbpl6	1
Dgka	1
AA414768	1
Arhgef18	1
Rapgef4	1
Cbx4	1
Pdlim4	1
Cyp39a1	1
Gm6568	1
Tyrobp	1
1700088E04Rik	1
Tlr13	1
Arl4d	1
Klrd1	1
Lacc1	1
Dnajc14	1
Plcb1	1
Dtnb	1
Pcdhga8	1
Cabin1	1
Gm16386	1
Mical2	1
4732416N19Rik	1
Plscr4	1
Zbtb42	1
2610206C17Rik	1
Spats2l	1
BC018507	1
1110020A21Rik	1
Slc26a11	1
Numa1	1
Crebl2	1
4921531C22Rik	1
Ldlrap1	1
Zfp758	1
Exoc6b	1
Gm6034	1
Sparc	1
Spink13	1
Srpx	1
Dusp28	1
A830009L08Rik	1
Slc16a7	1
Slc16a4	1
Slc13a2	1
Mylpf	1
Lbp	1
Stpg1	1
Gm4285	1
Brsk2	1
Zfp287	1
Ciz1	1
Cacna2d4	1
Zfp831	1
Slc9a3r1	1
Atm	1
Gda	1
Ankrd24	1
Zfhx2	1
Cebpa	1
Gm19705	1
Itga2	1
Emid1	1
Cfp	1
Cyp4f18	1
Dcaf5	1
C1qtnf6	1
Fyco1	1
Itgb1bp2	1
Rhd	1
Chst12	2
Nup210	2
Tcea2	2
Gbf1	2
Zfp703	2
Lta4h	2
Zfp362	2
Ndufb3	2
Mdm4	2
Sytl1	2
Fam173b	2
Tfeb	2
Tbc1d14	2
Wdr47	2
Ctdnep1	2
Coro1b	2
4921530L18Rik	2
Tsen34	2
Taf12	2
R3hdm4	2
Psmd10	2
Esyt1	2
Nadsyn1	2
Acaa1b	2
Pts	2
Map7d1	2
Gm15417	2
1500032L24Rik	2
Gm13212	2
H6pd	2
Vps26b	2
Fkbp8	2
Isoc2b	2
Gstp2	2
2900008C10Rik	2
Gjd3	2
Thap6	2
9130011E15Rik	2
Nosip	2
B630005N14Rik	2
Rabep2	2
Atg10	2
Tanc1	2
Ebpl	2
Hint2	2
Hint3	2
Pitpnm1	2
Otud3	2
Fars2	2
Dhx34	2
Agfg2	2
St7l	2
Lrrc61	2
Exoc7	2
Fut8	2
Klhl17	2
3110052M02Rik	2
Ikbkg	2
Gltp	2
Vkorc1	2
Uckl1	2
Kptn	2
Zfp707	2
Pcca	2
Atg4a	2
Cacnb1	2
Vrk2	2
Gatad2a	2
Wbp1	2
1200014J11Rik	2
Mast3	2
Cdkn2c	2
Wwox	2
Pih1d1	2
Jak3	2
Commd4	2
Tmco4	2
Ing4	2
Vps41	2
Polr2i	2
Pigv	2
Ldhb	2
Hist1h4d	2
Klc3	2
Tbc1d17	2
Fbln1	2
Mlycd	2
Idh2	2
Vamp8	2
Ppt2	2
Uggt1	2
Arhgap9	2
Dhrs7	2
Fbxo8	2
Snx30	2
Zc3h4	2
Inpp5b	2
Tmem219	2
Cutc	2
Surf1	2
Mmgt2	2
Npc1	2
Bre	2
Zmiz1	2
Trim8	2
Ndufa6	2
Tmem176b	2
Cwf19l2	2
Trim59	2
Zdhhc24	2
Celf2	2
C2cd5	2
Ube3b	2
Gmppa	2
Vav1	2
Rrm2b	2
Eif3f	2
Zmym6	2
Kdm4c	2
BC017158	2
Rin3	2
Mllt3	2
1810043G02Rik	2
Zmym1	2
Ilk	2
Sugt1	2
Ldb1	2
Tchp	2
Abcg2	2
Dapl1	2
Aaed1	2
Rbm5	2
Smpd1	2
Fam3a	2
Twf2	2
Ccdc71l	2
Actb	2
Eno1	2
Rsu1	2
Senp7	2
Cd151	2
Gmcl1	2
Zfp937	2
Ncf4	2
Hdac5	2
Sirt5	2
Ccdc69	2
Ano10	2
Tusc1	2
Spryd3	2
Ddx11	2
Ift88	2
Itfg1	2
Srpk1	2
Ehbp1	2
Acaa2	2
Nfkbil1	2
Smc4	2
Adck4	2
Pdlim7	2
Camk2g	2
Tmsb15b1	2
Klhl25	2
Rab8a	2
Stk11ip	2
Dag1	2
C2cd2	2
Cmas	2
Trpc4ap	2
Msrb2	2
Rb1	2
Tnk2	2
Gpx4	2
Bphl	2
Agtrap	2
Dnajb14	2
Efha1	2
Lrrc28	2
B9d1	2
Nudt22	2
Fam173a	2
Ttll5	2
Gm13546	2
Srgap2	2
Iqce	2
1110037F02Rik	2
Mlh3	2
Rps27	2
Spop	2
Mbtps1	2
Tbc1d10c	2
Chn2	2
Sgsh	2
Anapc11	2
Fanci	2
Depdc5	2
Ehmt2	2
Tmsb15l	2
Tmem62	2
Tha1	2
Calm1	2
Cd48	2
Acaa1a	2
Tpra1	2
Thnsl2	2
Mvb12b	2
2610002J02Rik	2
Myo18a	2
Tmc6	2
Dnajc28	2
Arhgef6	2
Churc1	2
DXBay18	2
Pdlim1	2
Ipp	2
Gdap2	2
Mum1	2
Dennd4b	2
Fam126a	2
Btbd10	2
Cyth2	2
Map2k4	2
Rbm44	2
Osgep	2
Klhdc10	2
Prmt2	2
Dguok	2
Mpnd	2
Pex11b	2
Pdk1	2
Rnf123	2
Hcls1	2
Sh2d3c	2
Ttf1	2
Actr8	2
Ttc3	2
Ficd	2
Rmnd5b	2
Abcd4	2
Kxd1	2
Zmat5	2
Sigirr	2
Pdlim2	2
Arvcf	2
Tasp1	2
Pkn1	2
Parp3	2
Eif3j1	2
Sipa1	2
Snurf	2
Rpp25l	2
Tpk1	2
Tmem179b	2
Agbl5	2
Tmem173	2
Spsb3	2
1700012D01Rik	2
Lipa	2
Sh3bp1	2
Zfat	2
Ing2	2
Cdan1	2
Rogdi	2
Slain2	2
Cmc1	2
Aamdc	2
Lbr	2
A730008H23Rik	2
Snx13	2
Zfp418	2
Mccc2	2
Fto	2
Ctsd	2
Bcat2	2
Pycard	2
Acot13	2
Rpl4	2
D4Wsu53e	2
Tmem120b	2
Tram1	2
Srpk2	2
Smyd4	2
Gpr19	2
Snapc5	2
Mfsd11	2
Mta3	2
Fance	2
Atxn7l1	2
Pmaip1	2
Tmem254c	2
Wbp5	2
Rwdd3	2
D2hgdh	2
Rfx1	2
Rps21	2
Ublcp1	2
Evl	2
Pard6b	2
Abhd15	2
Trappc11	2
Ttll1	2
Dnaja4	2
Lamtor2	2
Gga1	2
Lace1	2
Trex1	2
Lyrm2	2
Prdm10	2
N4bp3	2
Sdccag8	2
Rbl1	2
Psmb9	2
Stk39	2
Tm6sf1	2
Ccdc92	2
Ccbl1	2
Lactb	2
Arrdc1	2
Cbr1	2
Cotl1	2
2021-09-09	2
Gpn3	2
Cybasc3	2
Tango2	2
Pcbd2	2
Mzt2	2
Pon2	2
Zfp28	2
Lsm10	2
Zfp64	2
Txndc15	2
Snap47	2
Fam35a	2
Galnt7	2
Shpk	2
Nrm	2
Htatip2	2
Srcrb4d	2
Nt5c	2
Frmd8	2
Mrpl33	2
Dnajb13	2
Crot	2
Rnf214	2
Tmem154	2
Helb	2
Khnyn	2
Acox3	2
Alg12	2
Zfp414	2
Capn1	2
Pstk	2
Stim1	2
Hcfc1r1	2
Atox1	2
Trrap	2
Fundc1	2
Camkmt	2
Dolk	2
Fam160a2	2
Ptk2	2
Rpgrip1l	2
Cnnm2	2
Igbp1	2
Micu1	2
Cdc14a	2
Pik3c3	2
2610301G19Rik	2
Ict1	2
Zbtb7b	2
Ap1g2	2
R3hdm2	2
Hps5	2
9030624J02Rik	2
Kcnab2	2
Rcsd1	2
Tada3	2
Rpl36a	2
Tmem241	2
Paqr7	2
Kdelr1	2
Unc13d	2
Gtf2ird1	2
Uimc1	2
Phka2	2
Dpp7	2
AI413582	2
Aldh4a1	2
Gm10012	2
Fbxl20	2
Hnrnpul1	2
Cyba	2
Rac2	2
Azi1	2
Fuk	2
Gstp1	2
Ankrd54	2
Cdk5	2
Snrpn	2
Casp2	2
Mppe1	2
Tmc8	2
Apeh	2
Dpm1	2
Chpf2	2
Vps13c	2
Itgb1bp1	2
Acadsb	2
Lrp4	2
Bpgm	2
Cetn2	2
Psmb8	2
Drap1	2
Acap3	2
Plk1s1	2
Pccb	2
Plekho1	2
Hace1	2
Loh12cr1	2
Obfc1	2
Tbc1d8	2
Rmnd1	2
Csad	2
Kcnb1	2
Pcgf1	2
Nanos1	2
BC023829	2
Rab7l1	2
Pstpip1	2
Ndufaf3	2
Ift46	2
Dym	2
Arxes2	2
Higd2a	2
Scand1	2
Adck2	2
Pigk	2
Polr3gl	2
Gba2	2
Atp2a3	2
Cep19	2
Gm3258	2
Gpr108	2
2810006K23Rik	2
0610010K14Rik	2
Pik3r4	2
AU040320	2
Vars2	2
Coprs	2
Ascc1	2
Ap3b1	2
Ndufa13	2
Mgmt	2
St14	2
Fuz	2
Gng2	2
Man2c1	2
Trp53i13	2
Rnf14	2
1110001J03Rik	2
Btbd2	2
Cdc42ep4	2
Usf1	2
Fam98c	2
Fbxl4	2
Faf1	2
Tbc1d5	2
Msrb1	2
Oxr1	2
Mtmr4	2
Sh2b1	2
Fam86	2
Pigo	2
Pex6	2
Pex13	2
Ick	2
Habp4	2
Tssk6	2
Serpinc1	2
Tgfbrap1	2
Bex1	2
2510002D24Rik	2
Rab4a	2
Bscl2	2
Zfp772	2
Myeov2	2
Immp2l	2
Ctdspl	2
2510003E04Rik	2
Fam49b	2
Prmt10	2
Pfkfb4	2
Mdm1	2
Nbr1	2
Fam221a	2
Galnt12	2
Smc6	2
Nfatc2	2
Pygb	2
Ift80	2
Klhdc1	2
Itgb3bp	2
Abhd8	2
Dnajc4	2
4930453N24Rik	2
Dvl2	2
Pja2	2
Ankmy2	2
Tnfaip8l2	2
Ift140	2
Bbs2	2
Josd2	2
Pias3	2
Slc25a35	2
Dck	2
Zmynd8	2
Ext2	2
Tpgs1	2
2210013O21Rik	2
1110007C09Rik	2
Tmem134	2
Nme4	2
5830454E08Rik	2
Gm14420	2
Dnase1l1	2
Nsmce1	2
Gba	2
Map2k6	2
Akap17b	2
Dis3l2	2
Cnpy4	2
Cep128	2
Prkar2b	2
Trim68	2
Atp8b2	2
Acbd4	2
Itpr1	2
Gabarapl2	2
Araf	2
Cpm	2
Zbtb14	2
Taldo1	2
Cdk5rap2	2
Dpcd	2
Tbck	2
Hist1h2ab	2
Hltf	2
4933412E12Rik	2
1700047I17Rik2	2
Klhl5	2
Vwa8	2
Trappc9	2
Arxes1	2
Tmem175	2
Akr7a5	2
Rp9	2
Vps16	2
Cwc15	2
Map3k4	2
Wash	2
Supt3	2
Ccdc53	2
Hdac8	2
Vav3	2
Anapc16	2
Timp2	2
Ubr2	2
Park7	2
Rpa1	2
D10Jhu81e	2
2021-03-02	2
Larp1b	2
Siae	2
Ankzf1	2
1700066B19Rik	2
Paqr8	2
Ift20	2
Fam120b	2
Lrch4	2
AW554918	2
Urod	2
Rpl13a	2
Clec16a	2
Cd4	2
Tmem194b	2
Cdr2l	2
Adcy7	2
Ccdc117	2
Dusp23	2
Cdc25b	2
Gdi1	2
Tpp1	2
Zkscan3	2
Fam63a	2
Mcoln1	2
Lin37	2
1300018J18Rik	2
Hsdl2	2
Fmnl1	2
Zbtb8a	2
Ntan1	2
Mettl8	2
Rbck1	2
Pygo2	2
Bckdhb	2
Acyp1	2
Pddc1	2
Plk2	2
Zfp775	2
Leprot	2
Smad1	2
Cat	2
Klhl9	2
Fam213b	2
Spn	2
D230025D16Rik	2
Mpv17	2
Hadh	2
Ighmbp2	2
Dscr3	2
Rnpepl1	2
Amn1	2
Lysmd1	2
Xlr3b	2
Ten1	2
Emc2	2
Dpm3	2
6720456H20Rik	2
Ift52	2
Metap1d	2
Tmlhe	2
Zfyve1	2
Msl1	2
Rgs14	2
Fahd2a	2
Mospd3	2
2010315B03Rik	2
Atg14	2
Fam149b	2
Ppm1m	2
Chfr	2
Dhrsx	2
Gnb2	2
Fam78a	2
Dhrs1	2
Hspb11	2
Sntb2	2
Bcorl1	2
Mark3	2
Fam114a2	2
Cuta	2
Hps1	2
Adi1	2
Camta2	2
Sike1	2
Znf41-ps	2
Uap1l1	2
Rpl3	2
Supt20	2
Fbxo18	2
Fis1	2
Rcbtb1	2
Aes	2
Ispd	2
Slc50a1	2
Scrn3	2
Nkap	2
Ctsb	2
Itgb7	3
4930465K10Rik	3
Cd22	3
Il17ra	3
Sgk1	3
Chi3l3	3
Malat1	3
Zbtb22	3
2900060B14Rik	3
Trim24	3
AF251705	3
Ppm1h	3
Rhag	3
Gm5148	3
Cd97	3
Pld3	3
Gm1821	3
Zyg11b	3
Pde4d	3
Chd2	3
Ube2d2a	3
Xaf1	3
Ly6c2	3
Rell1	3
Irak3	3
Pyhin1	3
Serpinb1a	3
Hps3	3
Sbk1	3
Cd244	3
Ensa	3
Jmy	3
Smarca2	3
Fcnb	3
Zfp281	3
2410066E13Rik	3
Cdk19	3
Gbp6	3
Treml4	3
Znrf1	3
Pcif1	3
Naif1	3
Gm6251	3
Gm17757	3
Irgm1	3
Rnf167	3
Helz2	3
Adar	3
Hck	3
Ifi35	3
Fth1	3
Sipa1l2	3
Samd8	3
Kif1b	3
Ppp1r13b	3
2010003O02Rik	3
Ier5	3
Clp1	3
Arhgap20	3
Cd79a	3
Daxx	3
N4bp2l2	3
Cyth1	3
Galnt9	3
Gm12709	3
Dnahc17	3
Klf9	3
Hba-a1	3
Katna1	3
Lpar6	3
Mcl1	3
Rnf185	3
4930528A17Rik	3
Fbxl22	3
Spata13	3
Foxk1	3
Peli1	3
Icosl	3
Birc2	3
Arhgef11	3
St8sia6	3
Rsad2	3
St8sia4	3
Zfyve28	3
Spib	3
Zfp292	3
Lair1	3
Prg3	3
Tnfaip3	3
Gm14446	3
Cxcl10	3
Kifc2	3
Aip	3
Atn1	3
Cd7	3
Cep120	3
Ifngr1	3
Gimap3	3
P2ry10	3
Dusp11	3
Zc3hav1	3
Chrm3	3
Zbtb4	3
Tprgl	3
Emr4	3
Ncor1	3
Fry	3
Il6ra	3
Fam134c	3
Tcp11l2	3
Wdr44	3
Frat2	3
Klhl35	3
2810454H06Rik	3
Slu7	3
Nfkbiz	3
Gm16998	3
Exph5	3
Cd8a	3
Fam117a	3
Gm11346	3
Maf	3
Tlr2	3
Chd6	3
Map1lc3b	3
Chd3	3
Rgs1	3
Ust	3
Trp53bp2	3
Tmem127	3
Ciita	3
Foxj2	3
Mark2	3
Fyb	3
Map3k3	3
H2-T22	3
Ctss	3
Pou6f1	3
Nfia	3
Plbd1	3
Cdkn1c	3
Map3k9	3
Ctse	3
Cep97	3
Gpr132	3
Phc3	3
Abi1	3
Card11	3
2510039O18Rik	3
Wbp1l	3
Kctd12	3
Slc37a1	3
Dnajb1	3
Cfb	3
Tgtp2	3
Sqstm1	3
Antxr2	3
Acpp	3
Vcpip1	3
Cox7a2l	3
Gpr141	3
Hoxa7	3
Arid3b	3
Ubn1	3
Mkrn1	3
Myo6	3
Dntt	3
Zzef1	3
Csf1r	3
Gm4070	3
Tshz1	3
Cd55	3
Mfap1b	3
2810013P06Rik	3
Dnase1l2	3
Arhgap17	3
Gpx2-ps1	3
Fbxl12	3
Lyn	3
Mgat5	3
Zswim6	3
Gpr137b-ps	3
Bloc1s1	3
Dcaf15	3
Aff3	3
Dlg1	3
Gm16973	3
Gimap6	3
2610019F03Rik	3
Map3k2	3
Epm2aip1	3
Ly6c1	3
Bcl2	3
Shisa5	3
Mll3	3
Bcl11b	3
Supt5	3
1700056E22Rik	3
Tle4	3
Slc9a9	3
Pja1	3
Ifit3	3
Arid4a	3
Faim3	3
A630072M18Rik	3
App	3
Akap13	3
Ranbp10	3
Zc3h12a	3
Casc1	3
Thada	3
Acsbg1	3
Smad7	3
Slc25a2	3
Etnk1	3
2610008E11Rik	3
Akap2	3
Arl4c	3
Spred2	3
Rhoh	3
Shc1	3
Slpi	3
Inpp5k	3
Acss1	3
Oasl2	3
Glcci1	3
Vcam1	3
Gcc1	3
Cd200r4	3
Brd2	3
B330016D10Rik	3
H2-T10	3
Usp53	3
Gm10785	3
Crlf3	3
Dpp4	3
Pan3	3
Plekhg2	3
Sptlc2	3
Lmbr1l	3
Spon1	3
Fzd5	3
Gbp7	3
Rbm22	3
Kcnc1	3
Vgll4	3
Pira7	3
Tnfrsf26	3
Atp6ap2	3
Ep300	3
Vipr1	3
Lphn2	3
Ero1lb	3
Igfbp4	3
Nr2c2	3
Gak	3
Pag1	3
Chrna2	3
Slc15a2	3
Gng11	3
Mtmr3	3
Clec4n	3
Fam19a3	3
Atp10d	3
9930111J21Rik1	3
Brap	3
Fryl	3
Ppbp	3
Pgm2l1	3
Runx1	3
Glul	3
Mecp2	3
Neurl3	3
Wasf2	3
Fam26f	3
Itgam	3
Arntl	3
Erp27	3
Oas1a	3
Zfp36	3
Gm16515	3
Gimap1	3
Ablim1	3
Mbd2	3
4430402I18Rik	3
Lrpap1	3
Hs3st3b1	3
1810026B05Rik	3
Il16	3
Spic	3
Lyz2	3
Arl4a	3
Madd	3
Cep350	3
Zfc3h1	3
Pacs1	3
Inpp5a	3
Ddx58	3
Med13l	3
Tapbp	3
Ttc17	3
Synrg	3
Vrk3	3
Fcna	3
Hist2h2aa1	3
Dusp10	3
Klf2	3
Xpr1	3
Snca	3
Fut11	3
Herc1	3
Rnf144a	3
Apol7b	3
Parp10	3
Rhov	3
Sh3bp5	3
D930028M14Rik	3
Pdzd2	3
Myb	3
Hist1h4n	3
Lysmd3	3
Baz2a	3
Sfxn3	3
Nmnat2	3
Ly86	3
Bcl10	3
Fam101a	3
Ncoa1	3
Ppp1r12a	3
Znfx1	3
Arhgap25	3
A430078G23Rik	3
Sgms1	3
Ubb	3
Btbd6	3
9230116N13Rik	3
F8a	3
Fam65b	3
Pnrc1	3
Sptbn1	3
Tmem71	3
Rasa3	3
E130215H24Rik	3
Ngp	3
Dnajc6	3
Med16	3
Ccdc28a	3
Prr14	3
Kat2b	3
Lat	3
Mtmr12	3
Dirc2	3
Nmb	3
Rbm33	3
Eef1a1	3
Rnase6	3
4933421O10Rik	3
Med26	3
Prdm1	3
Ahdc1	3
Bank1	3
Dusp1	3
Mylip	3
Ccser2	3
Gm5547	3
Tmem66	3
A930005H10Rik	3
Mknk2	3
Ppp3ca	3
Calcoco1	3
Atg2a	3
Gbp2	3
Ssh2	3
4930486L24Rik	3
Nipbl	3
Iigp1	3
Als2cl	3
2810474O19Rik	3
Mepce	3
Actn1	3
Dnahc8	3
Tap1	3
Phf1	3
Kidins220	3
Mob2	3
Rest	3
Apol9a	3
Qsox1	3
Efnb2	3
Skap1	3
Lats2	3
Gmfg	3
Cd72	3
Rpl18a	3
Tgfbi	3
Plekhf2	3
Lefty1	3
Ets1	3
Gm5129	3
Hsd11b1	3
A530032D15Rik	3
Cdk14	3
Igsf23	3
Rab5a	3
Ttc28	3
Unkl	3
Lgals8	3
Dync1h1	3
Cd3g	3
Igf2r	3
Zfp654	3
Cdkn2aip	3
Notch1	3
Gm9846	3
Tmub2	3
Zfp180	3
Mmp11	3
Sos2	3
Trim12a	3
Scaper	3
Atp1b3	3
Mapk8ip3	3
Zfp687	3
Gimap9	3
Itga4	3
BC051537	3
Tmem167b	3
Gvin1	3
P2ry14	3
Hvcn1	3
Pde4b	3
Ifi203	3
Arid1b	3
Prf1	3
Xkrx	3
Zfp963	3
Tnik	3
Adrb2	3
F2rl1	3
Baz2b	3
Zfp68	3
Vps13b	3
Vps37b	3
Atp5sl	3
Man1a	3
Psenen	3
Pkd1	3
Gltscr2	3
Cic	3
Dnase1l3	3
Tlr1	3
Sik1	3
Gm12185	3
Ppp1r18	3
Elmsan1	3
Gramd3	3
Sepw1	3
Hipk1	3
Usp18	3
Mau2	3
Rassf4	3
Cyth3	3
Blk	3
Ppp1r3f	3
H2-Q7	3
Ccdc164	3
Gm20199	3
Spata2l	3
Sorl1	3
Armcx2	3
Ly6e	3
Btbd7	3
Rasgrp2	3
Tk2	3
Rbm48	3
Sidt1	3
Card6	3
Rgmb	3
Klf7	3
Heca	3
Ltf	3
Niacr1	3
Dok3	3
Cd3e	3
H2-Ob	3
Sp4	3
Fam3c	3
Ostm1	3
Dyrk1b	3
Arhgef1	3
Pydc3	3
Numb	3
Kdr	3
Rtp4	3
4932438A13Rik	3
Dazap2	3
Kbtbd11	3
Hspa5	3
Slc12a6	3
Rnf103	3
Tollip	3
Scai	3
Rexo1	3
Tmem123	3
Pramef8	3
Sh3pxd2a	3
Ankrd12	3
Sys1	3
Brd1	3
Zc3h6	3
Arap2	3
Ntng2	3
Fam49a	3
Gm10584	3
Msn	3
Sesn3	3
Tex264	3
Fam169b	3
2021-09-06	3
Smurf2	3
Klhl11	3
Cdh1	3
Lmtk2	3
Ifitm6	3
Abcg1	3
Inpp4a	3
Trim26	3
Filip1l	3
Add3	3
Zbtb20	3
Rcn2	3
Kctd18	3
Bach1	3
Ctdsp1	3
Dbp	3
Sfrp2	3
Cilp2	3
Smchd1	3
Bahd1	3
H2-D1	3
Pcnt	3
Irf1	3
Ski	3
Cers4	3
Zfp764	3
Sntb1	3
Gab3	3
Rrad	3
Itprip	3
Zfp212	3
1810006J02Rik	3
Cd177	3
Cnnm4	3
Dtx3l	3
Gm15800	3
Tab2	3
Pglyrp1	3
H2-T9	3
Arhgap15	3
Gm12250	3
Hbp1	3
Atp11b	3
Mll1	3
Arhgap1	3
Pcmtd1	3
[truncated: 11,946 more rows]
