# Supplementary material for: CRISPR screens reveal neuropeptide signaling orchestrates T helper cell differentiation
Source: Research Square preprint supplement (doi:10.21203/rs.3.rs-1953978/v1), 2022-08-16
Supplement: Supplementary file 5 [file 839762be6bd8eb4b38cca298.xlsx]

## Sheet: qPCR primers
	Gene (Mouse)	Forward primer	Reverse primer
	Stat1	CTGTCCTTCATCCCGAGGGC	GCAAGGCAGGCACTGAACATA
	Stat4	CGAACGGGGAGACAAGGGTT	AGGAGATTGTGGCTCCGTGG
	Tbx21	GACCCAGAGGGACTTCATGGC	GACTGGACAGGGGAAGAGAGC
	Ifng	GTCCAGCGCCAAGCATTCAA	CCGCTTCCTGAGGCTGGATT
	Il12rb2	CCACATGAGGCTGACCCAAC	CCGAAGATGAGTGGGCGGAG
	Il18r1	ACAGGGGCACCCTAGCTCAT	GACTCCAGGCTGGGAACGAG
	Il4ra	AGCCCTGGCTCCATTACCAC	CAGGGCAGGGAATCCCAAGT
	Il5	ATGCTGGGCCTTACTTCTCCG	TGGAGTAAACTGGGGGAGGCT
	Il13	GGTCCACACAGGGCAACTGA	TCCCCACCGGGATACTGACA
	Gata3	GCTGTGAGCCTGTGCAAAAGA	TCACACACCCATTGCCCAGAT
	Ramp1	AGGGTTGAGCTATGGCAGCG	ACCTCAACACCCCAAAGTGCT
	Ramp2	CATCCCACTGAGGACAGCCT	CAGGTCGCTGTAATGCCTGC
	Ramp3	GAGAGGGCAGGCAAGGTCAT	CGTGGCTCCTAATGACCCCA
	Calca	GCTGGAGCAGGAGGAAGAGC	GCCCAGCATGCAGGTACTCA
	Adm	AGGCTGATACTCTCCGGGCA	AAGCATTGCACGTTCCTCGC
	Crem	TGCAGGGCTCTAGGAGCAGA	TCCCCTGGACCCCATTCCAT

## Sheet: sgRNAs for individual validatio
	Gene (Mouse)	sgRNA sequence
	Hif1a	TGAACATCAAGTCAGCAACG
	Aldoa	CCACGAGACACTGTACCAGA
	Hspa5	TGTGTTCAAGAACGGCCGCG
	P2rx7	ACCGGCGTTGTAAAAAGGGG
