# Supplementary material for: CRISPR screens reveal neuropeptide signaling orchestrates T helper cell differentiation
Source: Research Square preprint supplement (doi:10.21203/rs.3.rs-1953978/v1), 2022-08-16
Supplement: Supplementary file 6 [file 882bcf2c1631bb468c0440de.xlsx]

## Sheet: sgRNA library
Target Gene Symbol	sg #	sgRNA Sequence		Target Gene Symbol	sg #	sgRNA Sequence
Irf1	sgRNA-1	GCTGTGTGGAGATGTTAGCC		NO_SITE	sgRNA-1	AAACGATTTACGCGCGCTAT
Irf1	sgRNA-2	TTAATTCCAACCAAATCCCA		NO_SITE	sgRNA-2	AACCGCTTCGCGACGTAATA
Irf1	sgRNA-3	TGGAAGCACGCTGCTAAGCA		NO_SITE	sgRNA-3	ACCTGATACGTCGTCGCGTA
Rela	sgRNA-1	GATTCCGCTATAAATGCGAG		NO_SITE	sgRNA-4	AGTCCTACGCGCCGTAACGT
Rela	sgRNA-2	TCACCAAGGATCCACCTCAC		NO_SITE	sgRNA-5	ATACGCGATGTTACGCCGAT
Rela	sgRNA-3	ACAATAACCCCTTTCACGGT		NO_SITE	sgRNA-6	ATGTCGCGAACCGTGCGTAA
Bach2	sgRNA-1	ACGTGACGCTGATCGTGGAG		NO_SITE	sgRNA-7	CAACGTTACGCGTCCGGTAA
Bach2	sgRNA-2	CCAGAAGTATTCACTGCATG		NO_SITE	sgRNA-8	CAGCGTACGAATACCGCGGG
Bach2	sgRNA-3	GTTCGGTATAACGAAAGGTG		NO_SITE	sgRNA-9	CCGAACGGCCGTCGTACGTC
Sox9	sgRNA-1	GTACCCGCATCTGCACAACG		NO_SITE	sgRNA-10	CGCTTACCGACGGTTCGCGA
Sox9	sgRNA-2	GCTGGTACTTGTAATCGGGG		NO_SITE	sgRNA-11	GAAACGACCGATTACGCGCG
Sox9	sgRNA-3	ACCAGCCGAGTCCTCCGACA		NO_SITE	sgRNA-12	GAAACGACGCGCGCCAATAT
Aire	sgRNA-1	AACAAGTTCGAAGACCCCAG		NO_SITE	sgRNA-13	GAATGTACCGCGTATCGCGA
Aire	sgRNA-2	CTGGATAAGGATCCCTTCCA		NO_SITE	sgRNA-14	GACTCGTCAATCGACGCGCG
Aire	sgRNA-3	GTTGCCATCTGGCTTCTTAG		NO_SITE	sgRNA-15	GATTCGATCGGTCGTATACG
Etv4	sgRNA-1	GAAGCGCTGATGGTCCCGCA		NO_SITE	sgRNA-16	GGGCGTAATACGCTCGCGTC
Etv4	sgRNA-2	TGTGCTCACCAAGGTACCCG		NO_SITE	sgRNA-17	GGGGCGTTTCGTACCGGCGT
Etv4	sgRNA-3	CCCCTATCAACACCAACTGT		NO_SITE	sgRNA-18	GGTACGACGCCCGTATGGCG
Prdm1	sgRNA-1	TTGGAACTAATGCCGTACGG		NO_SITE	sgRNA-19	GGTACGCGAACCGTACGTTA
Prdm1	sgRNA-2	GGATAGGATAAACCACCCGA		NO_SITE	sgRNA-20	GGTGTCGTACGACCGATGTA
Prdm1	sgRNA-3	GTGTAGACTTCACCGATGAG		ONE_NON-GENE_SITE	sgRNA-1	ATCCGTCCGTATAATTGGCG
Scrt1	sgRNA-1	TCGCCATCGTAGACCGACGC		ONE_NON-GENE_SITE	sgRNA-2	GAGTACCCGAGTCGACGCTC
Scrt1	sgRNA-2	CGGCTACATCAACGGCGACG		ONE_NON-GENE_SITE	sgRNA-3	CTCGCCTACTAGATTCGTAG
Scrt1	sgRNA-3	GTTGCTCAAAGGGCCATCCC		ONE_NON-GENE_SITE	sgRNA-4	TGCCTTAGGATCGACGGAAG
Sox5	sgRNA-1	GAAAACTCACATGTAAGGGA		ONE_NON-GENE_SITE	sgRNA-5	TGACTTAGTCGCAACTACCG
Sox5	sgRNA-2	CTGTTTCTCCACAGATCGCG		ONE_NON-GENE_SITE	sgRNA-6	CTAGAATTATATCGCCTACG
Sox5	sgRNA-3	GGGACTCCCGAGCGGCGCAA		ONE_NON-GENE_SITE	sgRNA-7	ATGGCTCTATTGATCCGTTG
Rorc	sgRNA-1	GTCATCTGGGATCCACTACG		ONE_NON-GENE_SITE	sgRNA-8	AGTTGTCAGTCGTTCGATCA
Rorc	sgRNA-2	TGTCCCCACAGATCTTGCAA		ONE_NON-GENE_SITE	sgRNA-9	CCCCGACAATGCCCCGACAA
Rorc	sgRNA-3	AGAGGCATATGGTACCTCTG		ONE_NON-GENE_SITE	sgRNA-10	TCATCTTGGAGCATTACGCC
Gata3	sgRNA-1	AGGTATCCTCCGACCCACCA		ONE_NON-GENE_SITE	sgRNA-11	CCTCCCTGTTTAATCGACTT
Gata3	sgRNA-2	GGAAGCTCAGTATCCGCTGA		ONE_NON-GENE_SITE	sgRNA-12	CATATCGATACGATACGGAG
Gata3	sgRNA-3	GCCGGAGGGTAAACGGACAG		ONE_NON-GENE_SITE	sgRNA-13	ATAGGTCACCTACGACCCGT
Gfi1	sgRNA-1	CCCCGACTCTCAGCTTACCG		ONE_NON-GENE_SITE	sgRNA-14	AAGAGGAGCGAATACCGATA
Gfi1	sgRNA-2	CTACGGCGACTTCGCGCCTG		ONE_NON-GENE_SITE	sgRNA-15	ATCTGTCTAACATTACGACC
Gfi1	sgRNA-3	CCTCCAAAAGTCCTCGAACT		ONE_NON-GENE_SITE	sgRNA-16	GAATCGATGGCACCCAATTG
Pparg	sgRNA-1	AATGCTGGAGAAATCAACTG		ONE_NON-GENE_SITE	sgRNA-17	CTCTGCGCCCGTGTTAAACG
Pparg	sgRNA-2	AGAACCTTCTAACTCCCTCA		ONE_NON-GENE_SITE	sgRNA-18	CTGCTAACATGCATCCGTCA
Pparg	sgRNA-3	CTGCCTATGAGCACTTCACA		ONE_NON-GENE_SITE	sgRNA-19	TGAGTACCCGAGTCGACGCT
Ikzf3	sgRNA-1	ACCTCATGAGATAGAAAACG		ONE_NON-GENE_SITE	sgRNA-20	ATGCTCACGATGACCGTAAG
Ikzf3	sgRNA-2	AAGATGAACTGCGACGTGTG
Ikzf3	sgRNA-3	ATTATGAAGCCGGAGCCCAT
Stat1	sgRNA-1	TGCAAAACCTCTCAGAACAG
Stat1	sgRNA-2	TGTGATGTTAGATAAACAGA
Stat1	sgRNA-3	TTAATGACGAGCTCGTGGAG
Stat6	sgRNA-1	AGAAAGCATCTGAACCGACC
Stat6	sgRNA-2	AGGAGATGCCGTAGGCGTTG
Stat6	sgRNA-3	TTCTATAGAGCATCTATCAG
Twist	sgRNA-1	CGCGGCAAGAAATCTGCGGG
Twist	sgRNA-2	GCTGTTGCTCAGGCTGTCGT
Twist	sgRNA-3	GACCGGCAGCAGCCGGCGAG
Foxo3	sgRNA-1	GCAGCATGGCCGAATCCTCG
Foxo3	sgRNA-2	AACAAGTACACCAAGAGCCG
Foxo3	sgRNA-3	CAAGGAAATGCTCCTCGCGG
Eomes	sgRNA-1	GCTGTCCATGGAGTAGCGCG
Eomes	sgRNA-2	GCCATACGCCGGAACCTCAG
Eomes	sgRNA-3	GGGTACTGGAAGAGCGAGCA
Csf2	sgRNA-1	GGATGACATGCCTGTCACGT
Csf2	sgRNA-2	CTGCTCGAATATCTTCAGGC
Csf2	sgRNA-3	CCGGCCTTGGAAGCATGTAG
Hesx1	sgRNA-1	CAGCATACCTGAGTCACCGC
Hesx1	sgRNA-2	TTTCAAAGAGCGTGTTTCGG
Hesx1	sgRNA-3	CAAGGAAATGAAGTCTCACT
Foxj1	sgRNA-1	GGCCGACAGAGTGATCTTGG
Foxj1	sgRNA-2	CATCTCGAAGCGCGCCCCCG
Foxj1	sgRNA-3	CAGGCAGGGTCTGCCGCCAG
Fah	sgRNA-1	CCGATGGCTACACCAATCCG
Fah	sgRNA-2	ACATCAACATGTCTTCGATG
Fah	sgRNA-3	TACCGCTCCAGTCGTTCATG
Pml	sgRNA-1	TCACTAGCAAGCCATACAGG
Pml	sgRNA-2	CCAGTGGTACCTCAAGCATG
Pml	sgRNA-3	AGCGCGCATGTGCAACACAG
Fhl2	sgRNA-1	GTATTCATTGGAATAGCAGT
Fhl2	sgRNA-2	GGAGGAGAACCCACACTGTG
Fhl2	sgRNA-3	TGCTTCCATTGCTCCCGGTG
Etv5	sgRNA-1	AGAGGGAGGCTTCCTATCGT
Etv5	sgRNA-2	GTGGCTACAGGACGACAACT
Etv5	sgRNA-3	CAGGAGGCTTGGTTAGCTGA
Hif1a	sgRNA-1	TGAACATCAAGTCAGCAACG
Hif1a	sgRNA-2	CAAGATGTGAGCTCACATTG
Hif1a	sgRNA-3	ATAACGTGAACAAATACATG
Runx3	sgRNA-1	GGACGTGCTGGCCGACCACG
Runx3	sgRNA-2	CACTGCGGCCCACGAATCGA
Runx3	sgRNA-3	TCCATCCGGCACATCCCCCA
Stat4	sgRNA-1	GCATGCCAACGCACCCTCAG
Stat4	sgRNA-2	AAATCCAATGCATGTAGCTG
Stat4	sgRNA-3	GATTGAGACTCAAGACTGGT
Tbx21	sgRNA-1	CCCAGACACCTCCAACCCCG
Tbx21	sgRNA-2	TGATCATCACTAAGCAAGGA
Tbx21	sgRNA-3	AAGGATCCAAGGAAGCGACC
Irf8	sgRNA-1	AGTTTACCGAATTGTCCCCG
Irf8	sgRNA-2	TCGACAGCAGCATGTACCCG
Irf8	sgRNA-3	ACAAAGCTGAACCAGCCACG
Bhlhe40	sgRNA-1	TGGAGCACGGAGACCTGTCA
Bhlhe40	sgRNA-2	CAAGTGTACAAGTCCAGGCG
Bhlhe40	sgRNA-3	TTTGTCGGGAAGAAATCTCG
Zbp1	sgRNA-1	TGAGCTATGACGGACAGACG
Zbp1	sgRNA-2	CAGGTGTTGAGCGATGACGG
Zbp1	sgRNA-3	GGAAGCCAATGGGCCTCACA
Zbtb32	sgRNA-1	CAATCAGAAGACTTCATGAG
Zbtb32	sgRNA-2	GATACCCTGATCACAGTAGG
Zbtb32	sgRNA-3	AGCATAAAGCACCCGGAGAG
Gzmb	sgRNA-1	GATCGAAAGTAAGGCCATGT
Gzmb	sgRNA-2	GTATAATAAATGTCACTTTG
Gzmb	sgRNA-3	GCAGCCTGAGGCGATATGTG
Ifng	sgRNA-1	GAACTCAAGTGGCATAGATG
Ifng	sgRNA-2	TATCTGGAGGAACTGGCAAA
Ifng	sgRNA-3	GTTTCTGGCTGTTACTGCCA
Lta	sgRNA-1	GAGGCAGAAGTTTACCAACA
Lta	sgRNA-2	GTGCTTCTGAGGGAGTGGAT
Lta	sgRNA-3	GATCGTGCCTTTCTCCGACA
Gzmc	sgRNA-1	GGGAAGAAGATGTTCTGCGG
Gzmc	sgRNA-2	ACTGGGGGCTCACAACATCA
Gzmc	sgRNA-3	CTTTCAGAGGAGATAATCGG
Tnfrsf18	sgRNA-1	GCCAAACACAATATCCCCTG
Tnfrsf18	sgRNA-2	CAACTACACTCGGCTGACCT
Tnfrsf18	sgRNA-3	TTATTCTTGTCCAGGCAAGG
Tnfrsf9	sgRNA-1	TTGCTCCTCTACCCACAACG
Tnfrsf9	sgRNA-2	ACTCTGCAGATGTTACAGTT
Tnfrsf9	sgRNA-3	ACCAGGCTGACAGTTATCAC
Gpr171	sgRNA-1	TTTCTGTATAAAAGCCCACG
Gpr171	sgRNA-2	AGTACATATTGATGTAGATG
Gpr171	sgRNA-3	GTAAAAATCATTGTTGACTT
Gpr18	sgRNA-1	GCAGACTGAGTATAAATACG
Gpr18	sgRNA-2	GCTTGGGTAAAACACCACCA
Gpr18	sgRNA-3	TTCTAATGGCTCACACCCAG
P2rx7	sgRNA-1	ACCGGCGTTGTAAAAAGGGG
P2rx7	sgRNA-2	ACGCCCCGCTTACCTAATGT
P2rx7	sgRNA-3	ACAAACTATGTCAAGTCAGA
Ramp3	sgRNA-1	CTGGAAGTGGTGCAACCTGT
Ramp3	sgRNA-2	TATGCGGCTGCAACGAGACA
Ramp3	sgRNA-3	TGGAGAGGCTGCCTCGCTGT
Il10ra	sgRNA-1	TCTGGCTTCAAACCACACAT
Il10ra	sgRNA-2	TGGCCCGGTAGCCATAGCTT
Il10ra	sgRNA-3	GCCCACGATAACCCCTGCAG
Il12rb2	sgRNA-1	ACTGAGAACACGAACACCAG
Il12rb2	sgRNA-2	CTATCAGGTGACGTTACAAG
Il12rb2	sgRNA-3	TTGATTCTGATGTCCCACGG
Il18r1	sgRNA-1	TCACCGATCACAAATTCATG
Il18r1	sgRNA-2	GCCTTTGAACCATCTCATGG
Il18r1	sgRNA-3	GAACGTACATTTCTCAAGTC
Il2ra	sgRNA-1	GTGTCTGTATGACCCACCCG
Il2ra	sgRNA-2	GAGAGGTTTCCGAAGACTAA
Il2ra	sgRNA-3	CTCTTACCTGCCCGACAACT
Il2rb	sgRNA-1	ACACCACATTTATGTCAAGG
Il2rb	sgRNA-2	CCTGTGAGCTAACTCTTGTG
Il2rb	sgRNA-3	GAGCCAATGTCTCTTGCATG
Ccr5	sgRNA-1	AATCAATGTGAAACAAATTG
Ccr5	sgRNA-2	AGTACCTATCAATTGTCAGG
Ccr5	sgRNA-3	TGATATCTACCTGCTCAACC
Cxcr6	sgRNA-1	AATGTATATAATCAGAACCA
Cxcr6	sgRNA-2	GCAGAGTACAGACAAACACC
Cxcr6	sgRNA-3	TGTGCCAAAGACCCACTCAT
Tnfsf10	sgRNA-1	AGTACTCCTCCCTTGCCCAG
Tnfsf10	sgRNA-2	GTTCAAGATCTCTCCATCAG
Tnfsf10	sgRNA-3	ACTGTATCAGCTCATTGAAG
Ccl3	sgRNA-1	AACTTACATGACACCTGGCT
Ccl3	sgRNA-2	TAGTCAACGATGAATTGGCG
Ccl3	sgRNA-3	GACTTGGTTGCAGAGTGTCA
Ccl4	sgRNA-1	GCTTCACAGAAGCTTTGTGA
Ccl4	sgRNA-2	TGAGAACCCTGGAGCACAGA
Ccl4	sgRNA-3	AGAAACAGCAGGAAGTGGGA
Ccl5	sgRNA-1	GTGGGCACGAGGCAGCGCGA
Ccl5	sgRNA-2	AACCCTCGACTTACATGGTG
Ccl5	sgRNA-3	AAGATTGGAGCACTTGCTGC
Hopx	sgRNA-1	AGCCGAGGCGGGTCTCACGG
Hopx	sgRNA-2	CCTGGAGTACAACTTCAACA
Hopx	sgRNA-3	ATGTCGGCGCAGACCGCGAG
Gadd45g	sgRNA-1	CGCAAAAGGTCACATTGTCA
Gadd45g	sgRNA-2	ACTGCACGAACTTCTGCTGT
Gadd45g	sgRNA-3	TTCCGGAAAGCACAGCCAGG
Bsg	sgRNA-1	CCACCTTACTCGGCCACCCA
Bsg	sgRNA-2	GGCTGCATGCTGACGGTAGG
Bsg	sgRNA-3	CAAACCACCACTGGATCTCG
Crabp2	sgRNA-1	CTCCACCACTGTGCGAACCA
Crabp2	sgRNA-2	CAACTGGAAGATCATCCGAT
Crabp2	sgRNA-3	GATGATGAGGAAGATCGCTG
Furin	sgRNA-1	ACAATGCCCGAATTGGAGGT
Furin	sgRNA-2	GGACGTGTATCAGGAGCCCA
Furin	sgRNA-3	TCATTCATCTGTGTGTACCG
Nkg7	sgRNA-1	GCCATGACAGTTGAGACCAG
Nkg7	sgRNA-2	GGCCACTATCCAGAAATCAG
Nkg7	sgRNA-3	TGTCACATGGATATAACCTA
Rgs1	sgRNA-1	AATACTTACTCTGGTTGGCA
Rgs1	sgRNA-2	TACATACATGTCTTTGGACT
Rgs1	sgRNA-3	GATGTGGGATCATCGATCTC
S100a10	sgRNA-1	CGACAAAGACCACTTGACAA
S100a10	sgRNA-2	CACTTACTTCCAAAAACCCA
S100a10	sgRNA-3	CCTGTGAAACGTAAGCATCA
Pak6	sgRNA-1	CCTCCACAGACAGTGGTACG
Pak6	sgRNA-2	TTGTGGGTCTGCCCCCACAA
Pak6	sgRNA-3	CCTCTACCTCAGCTGCAATG
Gbp7	sgRNA-1	CATTGTAGGACTATACCGTA
Gbp7	sgRNA-2	CTTAGTTTCAGACCTAACTG
Gbp7	sgRNA-3	AGAAGCACGAGTGTGAACTT
Mt3	sgRNA-1	CACACTTCTCACATCCGGCA
Mt3	sgRNA-2	GGGGCTCACCAGTAGGACAG
Mt3	sgRNA-3	TCGGACAAATGCAAGTGCAA
Dusp5	sgRNA-1	CCTTTAAGGAAGTAGACCCG
Dusp5	sgRNA-2	CTACAGACCAGCCTATGACC
Dusp5	sgRNA-3	GCTCAACGTCAACCTCAACT
Ermn	sgRNA-1	AACAGCCTAGCAGTCAAACC
Ermn	sgRNA-2	AAAGAAATACTTTACCATTG
Ermn	sgRNA-3	TGAGACCCAGGCATACTACA
Cycs	sgRNA-1	TCTTCCGCCCGAACAGACCG
Cycs	sgRNA-2	TTCTGTTTAGGCATCACCTG
Cycs	sgRNA-3	GTTCGGGCGGAAGACAGGCC
Fam162a	sgRNA-1	GTGGTCAGGCCGCTTCAAGA
Fam162a	sgRNA-2	TGGATTCTGCACCAAGCCAC
Fam162a	sgRNA-3	AAATCTGTGGGCTTGTGCAG
Ostf1	sgRNA-1	GGCAGAGTGATACCAGCTGG
Ostf1	sgRNA-2	CATTATCTACATCACTGACA
Ostf1	sgRNA-3	GGAGTGCTTGGACAACCGGG
Ms4a4b	sgRNA-1	ATGTTAATGGTCCCAATTTG
Ms4a4b	sgRNA-2	CTGTTATGACATCACAAATG
Ms4a4b	sgRNA-3	GAGTTAGACTGGCAACGATC
Sdf4	sgRNA-1	GATGGATGGACACCTCAACA
Sdf4	sgRNA-2	TAGACGTGAACACTGACCGG
Sdf4	sgRNA-3	CTCATCTACTCGGGAAAGAG
Vimp	sgRNA-1	TGTTGTTGTTAAGCGGCAAG
Vimp	sgRNA-2	TCTGGATGACAATGTAGAGT
Vimp	sgRNA-3	GGTCTCCAGCGCCGGCCTCG
Pcgf5	sgRNA-1	CTGCAGGCTGGATAACACGT
Pcgf5	sgRNA-2	TTATACAGATGATATTTCGA
Pcgf5	sgRNA-3	AGAAATACGTACATGTATGG
Sub1	sgRNA-1	CCCGTGAAGAAGCAGAAGCC
Sub1	sgRNA-2	CAGAGATGACAACATGTTCC
Sub1	sgRNA-3	GGACAGCGAAGTTGAAAAAA
Igtp	sgRNA-1	CAGTCATAGATTTAGACCAC
Igtp	sgRNA-2	CCTTAGGTTCATTGGACATG
Igtp	sgRNA-3	ATTGGTAAGGCGGTGACAGA
Aldoa	sgRNA-1	CCACGAGACACTGTACCAGA
Aldoa	sgRNA-2	CCTTGCCCGGAGCCACAATG
Aldoa	sgRNA-3	TGCAGATGAGTCCACCGGTG
Arap2	sgRNA-1	GGACTGTGGATATCGCCGTG
Arap2	sgRNA-2	AGCTTACCTGAAACTCCGGT
Arap2	sgRNA-3	GGAACACTCTATGCCGGTGT
Atp2b4	sgRNA-1	GAGTACCACAATGATCACCG
Atp2b4	sgRNA-2	GTCTACCCTAGCAAAGACCC
Atp2b4	sgRNA-3	GTGGTGCAAGCTTACATCGG
Bcl2	sgRNA-1	ACATCTCTGCGAAGTCACGA
Bcl2	sgRNA-2	TACATTATAAGCTGTCACAG
Bcl2	sgRNA-3	GGCCCAGCGGTGGCAACGAG
Bcl2a1b	sgRNA-1	CTGAAGATAGTGCTCAGCCA
Bcl2a1b	sgRNA-2	TTTGTAAGCACCTACATCCA
Bcl2a1b	sgRNA-3	AGCACTCTGCATGCTTTGCT
Cblb	sgRNA-1	AGAAGTCGAAGCGAGCGATC
Cblb	sgRNA-2	CGTATGATGAAGTTAAAGCT
Cblb	sgRNA-3	ATCAAGGCGATCTTTCCCAA
Cdkn1a	sgRNA-1	GTGGAACTTTGACTTCGTCA
Cdkn1a	sgRNA-2	TGCTCCTGTGCGGAACAGGT
Cdkn1a	sgRNA-3	CCACGGGACCGAAGAGACAA
Ckb	sgRNA-1	CCACAGTCATGATGTACGGG
Ckb	sgRNA-2	ATTATTGAGGAGCGGCACGG
Ckb	sgRNA-3	GAGCTCGGCGTACAGCTCCG
Cysltr2	sgRNA-1	GTGACATGGAACATCCGGAA
Cysltr2	sgRNA-2	GAAATAATAGTCAGCCCTGA
Cysltr2	sgRNA-3	TATGGAAAAGCCATTTCCCA
Dap	sgRNA-1	TGCAAACCAGTCAGTACCGG
Dap	sgRNA-2	ACGCCAGAGATGAACACTGT
Dap	sgRNA-3	AACACCCACATACCGGAGAT
Dclk1	sgRNA-1	TCTTTCCCCAGAATGTCGAG
Dclk1	sgRNA-2	GGAGTCCAGCTTGATAGCGT
Dclk1	sgRNA-3	ATAATGTGAATTTGCCCCAG
Dgat1	sgRNA-1	AGTGGTTTCAGCAATTATCG
Dgat1	sgRNA-2	GCTCACCAATAATCACGCAT
Dgat1	sgRNA-3	ATACCCGGGACAAAGACGGG
Dock10	sgRNA-1	CAAGTCACGCAGTTATCCAG
Dock10	sgRNA-2	GTAGTTTACCACGTACCACT
Dock10	sgRNA-3	TCCCACTCATCATCCAAGGG
Gbp10	sgRNA-1	ACTGTGCAGTCTCAAACCAA
Gbp10	sgRNA-2	TAGTCGTGGCTATTGTTGGA
Gbp10	sgRNA-3	CTATTTGATGAACTGTCTGG
Gbp5	sgRNA-1	CTCAAACATTCAATCTACCG
Gbp5	sgRNA-2	GCAATAGGTCGATAGCCCCC
Gbp5	sgRNA-3	ACTGTACAGTCTCACACCAA
Gem	sgRNA-1	GTAGTGCTTATAGGGGAGCA
Gem	sgRNA-2	CTGCTCCGGAAGAGCACTGC
Gem	sgRNA-3	GGAGTATCCCTGCTGATGCC
Gimap7	sgRNA-1	GCAACTGAACCGCTTCACGG
Gimap7	sgRNA-2	ACTGTCAGAGTGACTCCCGC
Gimap7	sgRNA-3	CCACAGCAAACACCATCCTG
Gpnmb	sgRNA-1	AGAGAGCACAACCAATTACG
Gpnmb	sgRNA-2	AGTATTTCCAAAAACTGGGT
Gpnmb	sgRNA-3	TGTCTACAACTGGACTGCAG
Higd1a	sgRNA-1	CATCAGCCAACTTACCAATG
Higd1a	sgRNA-2	CTTCAGCTTGTACAACCCAT
Higd1a	sgRNA-3	CTTCATACGATGAAGGTCAG
Hspa5	sgRNA-1	TGTGTTCAAGAACGGCCGCG
Hspa5	sgRNA-2	GGAGCGTCTGATTGGCGATG
Hspa5	sgRNA-3	CATTCCAAGTGCGTCCGATG
Ifitm3	sgRNA-1	CTGACAGAAGCCGATCCGTG
Ifitm3	sgRNA-2	TTGATTCTTTCGTAGTTTGG
Ifitm3	sgRNA-3	GGTGTCGGTGCCTGACCATG
Klrk1	sgRNA-1	AAGGGTGAATCGAATTGCCA
Klrk1	sgRNA-2	TATCCACTAGGTATCATAAG
Klrk1	sgRNA-3	CGACCTCAAGCCAGCAAAGT
Ly6a	sgRNA-1	GAGTAACACAGACTCCATCA
Ly6a	sgRNA-2	TTCTTGCAGATTCTCAAACA
Ly6a	sgRNA-3	CAAATGGGACTCCATAGCAC
Pdia6	sgRNA-1	TCAGGATGTTGTTAAAGTCG
Pdia6	sgRNA-2	TAGTTCAAGTAAGAAAGACG
Pdia6	sgRNA-3	TTATTCAGAGTGACGGCCTG
Plac8	sgRNA-1	GGTTGAGTCACGATAACTGT
Plac8	sgRNA-2	TTGTCTGTGTGGAACAACGG
Plac8	sgRNA-3	ACACAGGCTGGTCTGCCAGT
Plscr1	sgRNA-1	CCAGCATATAATCATCCAGG
Plscr1	sgRNA-2	CTCCACTGAACTGTCCACCG
Plscr1	sgRNA-3	AAGCTGCTGGTGGATACGGA
Prelid2	sgRNA-1	GAGGGACTGATACCTTTCGG
Prelid2	sgRNA-2	CAGGACTCATCTATAGAAAG
Prelid2	sgRNA-3	TGTCATCTCTGTAAAAACTG
Rnf157	sgRNA-1	GACCGTGCACTACAAGCGAG
Rnf157	sgRNA-2	CCACAGCGTGCACTACCAGA
Rnf157	sgRNA-3	GAGTCTACCCTTACCGCCAC
Rnh1	sgRNA-1	ACTGTGGCCTCACTGAAGTG
Rnh1	sgRNA-2	GCTTCTCAAGACGGCACTGG
Rnh1	sgRNA-3	CAGCTTCTGGATCTTACAAG
Selp	sgRNA-1	ATGTACCGTCACACTTCGGG
Selp	sgRNA-2	GGGAACAAATAAGACACTCA
Selp	sgRNA-3	ACAGCACAAAGGCATACTCA
Serp1	sgRNA-1	CCCGAAGAAAAGGCGTCGGT
Serp1	sgRNA-2	AGCAAGAACATAACTCAGCG
Serp1	sgRNA-3	CGAAAATGGTCGCCAAGCAG
Sh2d2a	sgRNA-1	CAGCCAATGAACCTGACCCA
Sh2d2a	sgRNA-2	GGTCCTAGGGAATGCCGATA
Sh2d2a	sgRNA-3	GGTTTCTACTCACCACCGTG
Slamf1	sgRNA-1	ATCTGATGTTCATTCGTCAG
Slamf1	sgRNA-2	GAGCTATCCAGATCACCTGG
Slamf1	sgRNA-3	GTAGCTCAACTCAAAAGCCA
Slamf7	sgRNA-1	ACTGTAAATCTCTGCACGGT
Slamf7	sgRNA-2	CTTTCACAGAGCATTTGTCA
Slamf7	sgRNA-3	TGAATGTCACAGATCCATCA
Sytl3	sgRNA-1	TTGCAGGAGCTTTGCCCCAG
Sytl3	sgRNA-2	TGCAGTCAACGTGACTTCCA
Sytl3	sgRNA-3	GGCACTCGGAACACACGCGG
Tagln2	sgRNA-1	GATCACCACTCAGTGCCGTG
Tagln2	sgRNA-2	GATTGAGAAGCAGTACGACG
Tagln2	sgRNA-3	TTCCTACGGCCTGAGCCGAG
Tnip3	sgRNA-1	CAGAAGCAAAGTGTGACAGA
Tnip3	sgRNA-2	CTTGGAAAAACAGAGACAAG
Tnip3	sgRNA-3	GGAGCTGAAAACTAAACTGG
Tpi1	sgRNA-1	TGAAGGTCAGTACAAACGCA
Tpi1	sgRNA-2	CGGTGCACAAACCACCTCTG
Tpi1	sgRNA-3	CCAACGAAGAACTTCCTGGT
Trpm4	sgRNA-1	GCAGAATAGTTATAGTCCAG
Trpm4	sgRNA-2	ACACAGTGGCCGGATCCGTG
Trpm4	sgRNA-3	AGGGGCCTGGATCGTCACTG
Wisp1	sgRNA-1	CCTCTACTGCGATTACAGTG
Wisp1	sgRNA-2	GATGGCGTACGCTACACCAA
Wisp1	sgRNA-3	GTGATTAGGCTGACGCCCAG
