# Supplementary material for: CRISPR screens reveal neuropeptide signaling orchestrates T helper cell differentiation
Source: Research Square preprint supplement (doi:10.21203/rs.3.rs-1953978/v1), 2022-08-16
Supplement: Supplementary file 7 [file bdb1f407ea58a1aac02ce009.xlsx]

## Sheet: In vitro screening
Construct_IDs	others	Th1_Vex_pos	Th1_Ifng_neg	Th1_Ifng_low	Th1_Ifng_IM	Th1_Ifng_high	Th2_Vex.	Th2_IL13_neg	Th2_IL13_low	Th2_IL13_IM	Th2_IL13_High	CD8_Vex_pos	CD8_Ifng_neg	CD8_Ifng_low	CD8_Ifng_IM	CD8_Ifng_high	Th1_2nd_Vex_pos	Th1_2nd_Ifng_neg	Th1_2nd_Ifng_High	Th2_2nd_Vex_pos	pDNA_1	pDNA_2	pDNA_3	pDNA_4
AAACGATTTACGCGCGCTAT	435	14782	20632	15860	12586	8878	6116	8244	6623	9	16211	16339	24741	16037	17954	20385	10620	15885	16312	17293	46050	47408	46883	48313
AAAGAAATACTTTACCATTG	537	24842	24128	16591	18350	11108	11672	8297	20715	15657	16240	25855	29967	32160	30046	34010	30919	30732	31092	19373	63406	64312	63410	66526
AAATCCAATGCATGTAGCTG	597	12721	37154	32400	4895	22	9094	14860	11364	6744	21098	28012	29312	29263	22426	24199	29869	47290	9802	11954	55173	56652	55375	58408
AAATCTGTGGGCTTGTGCAG	392	11863	8841	4217	3903	10891	10892	9582	6967	5	16744	19342	17571	17962	10805	17839	14938	17568	20007	7429	35770	36783	36069	38576
AACAAGTACACCAAGAGCCG	423	14732	10111	5757	29231	6437	12290	3022	11620	23292	10590	25756	20089	17337	21264	22573	11471	17705	18156	13112	38464	39419	38778	41059
AACAAGTTCGAAGACCCCAG	354	14956	12781	4889	8247	29002	7391	7330	9163	7	7861	15484	17628	23730	17698	24852	16818	28373	13811	11907	37876	39030	38725	40053
AACACCCACATACCGGAGAT	425	3239	7193	10841	11947	3014	93	19239	8368	9161	12916	29502	20061	17527	16739	17392	18842	16583	13681	12646	40904	41943	40904	42704
AACAGCCTAGCAGTCAAACC	531	13572	28843	4720	8388	3250	14	2921	5187	19825	14489	24002	27905	32399	25416	28752	22505	26076	26691	11798	50824	51762	50477	53619
AACCCTCGACTTACATGGTG	299	12476	171	11695	9561	15865	13902	11030	8956	8506	14	13305	15530	9740	13237	13162	10945	8663	12853	4789	28906	29899	28903	30317
AACCGCTTCGCGACGTAATA	364	11827	17309	577	11738	3302	17069	4453	988	6	3526	11965	10242	19226	11253	16536	15801	16325	10897	11864	30682	31256	30713	32939
AACTTACATGACACCTGGCT	583	25077	27669	15172	12980	21094	3975	13247	12682	10579	13535	24427	18438	20451	23341	38826	23146	26183	27488	17698	51892	53740	52466	54280
AAGAGGAGCGAATACCGATA	386	25231	9503	14552	16678	12069	11488	15345	14	13908	13924	18791	19325	18239	16013	23752	15706	19279	16591	9735	38491	39426	38630	40691
AAGATGAACTGCGACGTGTG	376	6769	19165	2379	1682	23027	8258	11242	8649	13195	13323	21245	12631	19846	16206	26884	13119	11824	14458	14390	35862	37254	35296	38245
AAGATTGGAGCACTTGCTGC	417	23125	13746	3694	13167	13709	13198	3160	1037	6322	6742	22007	17697	14972	18060	18730	16041	16333	21602	13310	38695	39446	38979	40030
AAGCTGCTGGTGGATACGGA	326	6974	20369	6159	9118	9138	4	1774	2187	12018	16721	11856	18279	18524	11781	20804	9659	11185	12993	6380	26212	26725	26858	28376
AAGGATCCAAGGAAGCGACC	493	21826	30170	15146	10744	5749	3621	19102	13086	5031	14202	18171	28695	22092	13785	16034	16749	45595	15892	18114	40329	41512	41436	44128
AAGGGTGAATCGAATTGCCA	372	29355	16771	13097	11383	12994	5611	6513	4979	4488	8552	8521	13406	17964	12089	14770	15109	22556	14836	2983	31139	31547	30882	32049
AATACTTACTCTGGTTGGCA	481	31227	12963	5475	7551	10859	4207	4562	14583	2720	8208	27989	25502	28474	19134	20554	20576	21729	20715	11659	45081	46782	46378	48437
AATCAATGTGAAACAAATTG	535	19570	18566	13727	31370	2277	16372	11710	3944	17622	11118	23530	26717	37129	29338	34260	25935	31259	24646	13172	56900	57317	57314	59947
AATGCTGGAGAAATCAACTG	471	30725	15510	13578	14741	13287	2259	7950	12624	18927	13505	18531	19831	21551	21539	20517	22378	25856	18536	14037	48215	48689	48496	51158
AATGTATATAATCAGAACCA	604	14183	25860	13161	6355	11163	18327	17472	6785	17028	25317	28121	21050	34091	30901	30159	24010	32247	26450	13714	60632	62293	61044	64802
ACAAACTATGTCAAGTCAGA	602	15221	25200	12643	26827	12763	13860	17108	13534	27741	32497	27521	28645	34090	27954	25303	27798	23246	24369	13738	53351	54161	54027	55945
ACAAAGCTGAACCAGCCACG	402	12056	24261	9695	10514	21182	9951	7631	2688	2822	4182	12523	19585	15833	18441	20408	14053	19361	18190	11368	36749	36524	36413	38471
ACAATAACCCCTTTCACGGT	608	28144	39153	6305	28688	12402	10896	12416	7372	4071	15933	32271	31693	20422	27832	35042	21244	22917	19862	13167	48331	48397	49014	50500
ACAATGCCCGAATTGGAGGT	256	5154	436	2	5684	5472	2318	3201	1951	13021	4920	14176	11963	14268	12786	13240	12333	11893	15149	6133	28859	28903	28375	29782
ACACAGGCTGGTCTGCCAGT	270	13153	8118	1228	6375	5535	10059	2423	2908	5381	4427	9696	13259	12607	8097	18573	14780	15708	15020	5366	27137	27579	27386	28472
ACACAGTGGCCGGATCCGTG	325	5141	10376	10121	5	11362	10930	6582	3888	1675	7888	14521	8864	20419	9775	13441	13775	13398	12990	5417	30575	31744	30564	33208
ACACCACATTTATGTCAAGG	383	8600	12031	9639	3583	7118	7718	12903	814	4279	2113	7679	23379	15775	7081	3478	13003	23858	8852	11356	38209	39402	38742	40135
ACAGCACAAAGGCATACTCA	691	13029	14534	7802	13968	10060	8570	21737	6580	13346	9033	24328	29467	27550	29937	30019	24937	35944	28117	14267	52594	53562	51868	56198
ACATCAACATGTCTTCGATG	668	22952	19550	14664	6592	23961	12582	17583	12478	18893	3908	24835	30709	31529	25448	29140	26299	20578	22184	18383	51473	52650	52545	54847
ACATCTCTGCGAAGTCACGA	579	15393	17110	1417	21628	6791	10585	17453	7666	8698	19548	29697	18050	26150	21091	23482	14644	22673	16101	10652	42954	43990	43190	44736
ACCAGCCGAGTCCTCCGACA	317	7442	5176	10660	10178	16	11402	7100	7717	5452	3905	16899	8370	11925	13697	10646	13144	18037	12019	5313	26124	26229	26076	27627
ACCAGGCTGACAGTTATCAC	394	5989	22505	12722	22064	11194	3685	10042	6425	11092	3411	16016	15025	21643	19695	20793	13240	17523	17809	13514	38775	38720	38635	41209
ACCGGCGTTGTAAAAAGGGG	341	11040	4403	3578	13096	4594	1816	21117	7866	12264	5283	10297	11678	12926	14512	18288	16546	12542	11542	5262	27118	27632	27402	29205
ACCTCATGAGATAGAAAACG	545	9822	9934	3824	8442	15054	7808	6410	2661	7722	7044	23209	17986	17132	19079	28256	21109	24000	19519	12570	40278	41679	41214	42593
ACCTGATACGTCGTCGCGTA	388	16201	7643	10541	3423	10283	4767	4484	4402	11021	4775	9221	9098	13216	14510	14702	14015	16987	13937	8065	32112	33329	33687	34862
ACGCCAGAGATGAACACTGT	417	10962	9225	1274	12993	7097	13086	14788	5946	15134	7489	17278	12481	17411	14761	18857	12071	20463	15810	7433	32315	32682	32568	33726
ACGCCCCGCTTACCTAATGT	460	17765	8567	8548	3978	13339	19658	10101	6377	6090	955	15374	22272	25265	12616	20543	14683	11583	17472	7990	35241	36604	35722	37101
ACGTGACGCTGATCGTGGAG	370	14	4137	17	11447	11654	3915	11	7725	12963	10287	9388	10575	9665	16193	16544	13088	10500	13017	10508	23281	24534	23461	25276
ACTCTGCAGATGTTACAGTT	441	5313	14940	9087	18850	22821	6265	4111	4407	11550	17379	20665	24610	23373	23078	21414	19566	17788	13673	7066	40505	41820	39992	43046
ACTGAGAACACGAACACCAG	418	13433	45432	7697	14512	4308	4221	19189	9718	2916	13033	19160	18274	22442	15605	19544	20191	56428	7103	15234	40149	40875	40670	42621
ACTGCACGAACTTCTGCTGT	516	14477	22548	20176	19699	14479	6487	19585	4265	17198	12946	18742	22512	19716	14798	19441	24564	26506	18150	12099	42710	44215	42771	45131
ACTGGGGGCTCACAACATCA	270	5796	6862	1635	7669	12961	6839	1179	1531	6768	11	14140	15732	17368	11649	14370	9053	7977	10908	5727	29308	29842	30124	31135
ACTGTAAATCTCTGCACGGT	738	11594	24970	7262	18773	7454	22539	19472	6949	11920	9923	33926	24086	27765	34383	44333	27578	31673	32836	17147	51808	52238	52432	54357
ACTGTACAGTCTCACACCAA	691	14512	18350	3934	28163	12403	9655	4601	8232	12601	14460	21083	25159	27618	25055	27117	16942	21381	20706	16138	46176	47040	46761	48263
ACTGTATCAGCTCATTGAAG	659	9538	16745	8124	11123	19604	4321	8481	6974	13646	10426	24110	23409	17765	28051	35436	16713	26545	24163	19574	49481	50435	49955	51897
ACTGTCAGAGTGACTCCCGC	294	4864	18217	12318	5421	19845	1188	8450	1962	12377	10174	11801	16261	16910	7351	17112	10987	11834	11530	6048	26305	26660	26656	27765
ACTGTGCAGTCTCAAACCAA	353	6045	17557	6289	7554	5460	4455	4252	1663	6136	2282	11643	13950	9071	11174	15340	15409	10611	10954	4800	32964	34325	33445	35571
ACTGTGGCCTCACTGAAGTG	407	15955	14224	8894	16910	7047	2798	7045	6955	7368	20925	11903	16177	15605	8354	21549	13621	11347	15602	10149	28370	29219	28990	29928
AGAAACAGCAGGAAGTGGGA	265	8435	1185	773	7578	6	2713	7716	2822	7640	15	9928	15790	13120	15955	13546	9672	11260	11066	9209	25997	25693	25569	27757
AGAAAGCATCTGAACCGACC	479	11969	18082	12099	30538	19785	14939	9131	8058	2713	22	20221	20019	28874	25093	28415	16259	27628	22304	13322	45839	47144	46793	48054
AGAAATACGTACATGTATGG	638	16374	18121	12450	19206	23430	10763	8816	13706	13347	42863	31412	17177	26112	34090	40655	26580	23977	29188	17013	49070	50552	49942	52709
AGAACCTTCTAACTCCCTCA	539	5363	36724	16151	5420	22810	7797	15609	10469	12003	8238	26155	22309	25248	25716	35851	15248	25910	24479	18439	57521	59677	58148	61627
AGAAGCACGAGTGTGAACTT	350	16327	43233	1767	8670	10202	7458	6806	3390	13984	11447	8955	16559	12098	13362	20522	15659	13257	16989	8399	30479	31370	30833	32377
AGAAGTCGAAGCGAGCGATC	382	13284	11148	13672	18590	6787	11084	6875	2362	6151	19584	11960	17533	15541	18844	24696	17360	14941	10774	7605	35202	35376	34869	37836
AGAGAGCACAACCAATTACG	352	16812	7381	7	9837	8269	6852	9884	8397	15259	9333	20902	27061	15872	20294	23057	14165	19240	16616	14532	43060	42640	42346	45250
AGAGGCATATGGTACCTCTG	355	307	19004	13116	9760	8318	13968	19472	1870	18693	3746	14468	19050	15747	16404	14602	15984	13634	17161	8201	36477	37800	37195	39482
AGAGGGAGGCTTCCTATCGT	376	23564	19339	11313	14796	11799	13237	2084	1396	3710	4649	19600	18227	21003	16940	24414	20958	15769	15427	12732	37221	38604	37480	38810
AGCAAGAACATAACTCAGCG	510	28544	25342	3859	2416	17716	5893	8855	12572	21845	20456	24393	27493	16828	21193	24755	24495	30397	27183	12549	50769	51645	51315	52663
AGCACTCTGCATGCTTTGCT	575	23484	27878	11967	19330	12330	834	15728	7607	16756	5514	27109	30992	26276	28936	33113	24943	29168	27034	16521	52360	52572	52465	54143
AGCATAAAGCACCCGGAGAG	239	3189	6972	6732	13572	2987	5	8330	3227	8443	3244	17046	6693	10621	11012	11580	11680	8958	9652	6864	21752	22299	22359	23017
AGCCGAGGCGGGTCTCACGG	252	6268	4551	8506	18625	11818	2901	9957	6212	9513	9609	9306	11345	12712	7240	9144	11959	10192	7370	6965	20895	22029	21348	22750
AGCGCGCATGTGCAACACAG	346	11953	7825	19449	9210	10244	5146	12598	7633	11084	5814	15713	13869	17574	16712	11167	13682	17181	19279	8465	28539	28983	28715	30242
AGCTTACCTGAAACTCCGGT	350	15	24957	5491	1321	10573	10714	8247	13	17482	12019	13561	11557	13021	10018	15275	12029	20202	14854	7200	26344	26997	26798	27928
AGGAGATGCCGTAGGCGTTG	243	12897	19862	13352	4460	9	4	8350	6305	4213	14	11682	13538	7363	12368	13863	12468	19081	10227	5876	25157	25532	25693	26504
AGGGGCCTGGATCGTCACTG	489	14125	12423	16904	11416	6221	5846	16714	11234	6963	14308	14442	19006	10015	13643	21936	16763	16392	11968	8491	34752	34768	34191	35575
AGGTATCCTCCGACCCACCA	314	11278	11507	2529	14327	9709	2044	4669	10	2727	6253	12573	12319	18435	13043	20126	15029	16413	14342	12278	32868	33148	33442	34961
AGTACATATTGATGTAGATG	407	16190	8407	5190	9804	13898	6121	12530	7619	9014	10651	18469	24331	21983	17961	34546	15125	13195	24758	10934	42840	42983	42477	44543
AGTACCTATCAATTGTCAGG	455	6804	13939	4134	21357	22457	6180	23309	9109	5014	12154	23481	20518	32118	20507	23166	23031	17587	19193	10226	41068	41656	41360	43400
AGTACTCCTCCCTTGCCCAG	464	32501	17745	10437	28537	5695	6866	17935	2978	653	4884	16179	22342	17903	20942	20746	20152	17119	15497	10239	40433	40671	40241	42260
AGTATTTCCAAAAACTGGGT	344	7808	12845	7204	19036	21593	3461	13514	3079	10416	3469	14689	19641	21040	17363	20741	17547	20793	11074	12514	37626	38403	39045	40561
AGTCCTACGCGCCGTAACGT	416	8734	11478	13307	6276	16	5264	10045	199	7627	11409	18603	21332	12060	11649	13886	9969	10024	15898	12387	38658	40053	39991	41673
AGTGGTTTCAGCAATTATCG	273	1345	10675	988	9052	6342	3210	14381	1140	1516	4992	15380	8020	13639	12280	17651	12057	16305	16357	12675	28427	28513	28540	29919
AGTTGTCAGTCGTTCGATCA	410	8090	17072	7341	6736	5936	10678	18040	3308	12340	16665	17980	20447	19651	13451	13828	13598	20768	13689	5269	40713	40733	39670	43633
AGTTTACCGAATTGTCCCCG	565	13687	32785	7546	15720	18428	12411	5867	9243	18640	5969	21710	26637	20770	27628	21792	22088	27904	25648	10912	48080	49507	48959	51376
ATAACGTGAACAAATACATG	550	18022	19013	5596	14444	17149	12675	4534	16270	546	6404	14314	31682	27722	15803	11715	23421	29750	21807	11543	58879	60640	59959	62615
ATAATGTGAATTTGCCCCAG	438	6978	14164	1986	10212	10450	4713	10706	5401	1238	2510	25005	18867	22698	19305	27471	24334	15112	21911	9257	45284	46302	46206	47709
ATACCCGGGACAAAGACGGG	261	3357	11538	6985	12102	3364	9772	694	7394	3065	1638	12138	9855	12057	10464	9296	11384	6818	7986	3945	22018	22492	22335	23268
ATACGCGATGTTACGCCGAT	458	16922	7657	8642	12890	11851	8709	11223	5851	11267	5949	18522	19102	13923	19041	25623	15426	19055	21069	11745	42629	43356	42710	44690
ATAGGTCACCTACGACCCGT	276	10472	9369	4	4672	12426	6838	1861	9076	9112	5	14341	15927	15153	12929	11151	13641	11397	11377	7192	30162	30673	30511	32210
ATCAAGGCGATCTTTCCCAA	410	7562	17651	13718	17922	18296	12890	5794	7088	11037	16086	16704	17435	20550	13481	20148	15025	22935	11035	6603	36523	36150	36127	37917
ATCCGTCCGTATAATTGGCG	330	20964	9555	7672	6756	9537	2718	6038	8195	2078	19197	18286	22344	19776	12035	14509	11206	19385	15715	10115	31900	32717	32645	34587
ATCTGATGTTCATTCGTCAG	381	18910	25510	15432	5934	16	1907	8107	1952	3282	18546	15180	8812	21161	17629	21793	13850	18917	15655	7302	37651	38290	37495	40216
ATCTGTCTAACATTACGACC	541	12140	21464	13598	4383	22812	6822	16842	4337	14324	14606	25314	26954	27381	24998	30079	23145	21658	23357	12930	51126	51604	52045	53800
ATGCTCACGATGACCGTAAG	295	7707	6566	11	5	5065	7	6754	997	6506	3277	14679	15262	13190	14907	12679	10474	10775	16003	7163	29587	29709	29325	31398
ATGGCTCTATTGATCCGTTG	499	5958	14160	8856	14964	9545	4038	12699	12941	25236	5509	21709	18580	18457	16686	20037	19451	17147	17878	10349	43716	44754	44129	47015
ATGTACCGTCACACTTCGGG	403	5631	19020	8253	6450	2336	11689	9947	1472	9707	4420	15178	11278	13219	11392	22209	15121	14828	21398	6185	36506	37362	37019	38110
ATGTCGCGAACCGTGCGTAA	359	17013	7059	2432	1537	10	8243	12450	2904	15928	5152	7163	8981	15310	15726	14905	11538	19821	13904	7309	25701	26708	26265	27500
ATGTCGGCGCAGACCGCGAG	268	4014	11763	6551	5379	12	5244	8320	4408	3697	13681	6373	12040	11954	9452	13103	9179	10670	10557	4982	19648	19749	19116	20362
ATGTTAATGGTCCCAATTTG	494	21486	12906	821	17352	30446	3228	9949	2093	3847	1871	16957	21545	27949	18208	30480	18629	28000	15496	10353	43414	44726	43177	45377
ATTATGAAGCCGGAGCCCAT	470	6342	20500	10660	10309	13174	2370	20092	4159	1211	9425	18216	18864	17711	18753	28311	15025	18556	26329	8096	42739	42707	41976	45151
ATTATTGAGGAGCGGCACGG	195	13553	2415	3693	3528	5394	3828	8646	14	6	2160	11150	10546	11648	10902	17672	13514	11218	9222	6133	23260	23273	23290	24396
ATTGGTAAGGCGGTGACAGA	313	10655	10318	6213	8695	10	14574	4464	5156	3330	7846	13432	22209	18554	19302	22733	16030	23865	11162	10344	30312	30939	29889	32182
CAAACCACCACTGGATCTCG	385	14411	13951	4740	9560	9763	9227	9847	9881	7116	11344	15298	15523	16993	14548	20979	21468	13135	12642	9042	36589	37518	38307	40342
CAAATGGGACTCCATAGCAC	256	10451	6476	16560	4062	5480	3853	7591	8665	7005	15213	11314	16314	19554	8029	18144	12625	15673	8840	5742	30741	31658	30420	32517
CAACGTTACGCGTCCGGTAA	353	15945	15251	5887	7923	9932	5380	10070	4454	7263	10554	23168	25003	18037	18427	19548	21234	26813	17737	10520	28947	29651	29525	31481
CAACTACACTCGGCTGACCT	409	7501	26234	10326	10189	14079	11117	7670	12951	2201	25153	24426	23740	13076	13691	22322	15467	15724	17365	12539	42674	45037	44252	46086
CAACTGGAAGATCATCCGAT	442	32617	33227	1842	19126	10319	4247	16928	9562	5319	16500	14198	18741	24790	22766	23663	14226	22629	15210	8716	39474	40285	39668	42042
CAAGATGTGAGCTCACATTG	324	11062	30048	2343	22069	21064	13407	1893	5003	11243	2425	12209	11626	11796	12475	11165	16114	17134	22038	9646	35461	36457	35872	37750
CAAGGAAATGAAGTCTCACT	492	14940	26110	5620	16588	17670	5252	7372	12596	18485	6749	24502	28228	21609	21035	28836	20903	21830	22629	17637	50124	51945	50324	53486
CAAGGAAATGCTCCTCGCGG	175	16190	26	7	4178	12027	4022	3944	3395	4962	12	7958	10126	11496	9850	7397	10443	8475	12270	5045	20098	20129	20197	21039
CAAGTCACGCAGTTATCCAG	347	5675	20209	21416	8377	4842	1844	14975	575	11407	18431	19345	23367	17792	13184	21222	15173	15436	15431	10671	33330	33139	33128	34364
CAAGTGTACAAGTCCAGGCG	220	7287	8069	8104	6499	5338	2428	6305	650	4509	3709	11969	12888	10522	8417	8830	5476	11335	7657	5853	25531	25952	25718	26817
CAATCAGAAGACTTCATGAG	421	8325	14639	3210	15923	17434	3684	11657	19	1979	2607	17877	24769	22729	19839	20902	15763	18847	15483	14011	40510	41121	40955	42901
CACACTTCTCACATCCGGCA	393	10083	11437	11225	26681	4322	14622	6255	4906	7869	8084	15496	17119	20425	23435	21916	22706	22970	8974	8256	38014	38690	37468	40889
CACTGCGGCCCACGAATCGA	211	3973	15720	7504	6040	9127	5834	6842	6	3234	16	10807	26360	11244	3998	2710	7715	18953	6994	6542	21478	22123	21491	22463
CACTTACTTCCAAAAACCCA	661	22064	26666	13389	8833	32234	17113	15682	9932	28088	21062	26778	26985	27351	24350	33017	21590	25276	31165	13390	52881	54047	52718	55513
CAGAAGCAAAGTGTGACAGA	283	5409	8367	5120	8642	2062	2876	3421	3662	2380	21570	12331	15704	21357	18976	23072	14469	15159	17227	10140	28961	32875	32152	33970
CAGAGATGACAACATGTTCC	428	14306	36731	18225	25480	14384	4519	3230	13818	9	13361	18185	22575	27800	24060	28794	18245	17489	21995	14633	45145	45757	45688	47596
CAGCATACCTGAGTCACCGC	269	10723	19749	11510	8841	8242	4	3116	7388	12382	4360	13886	10372	14709	18622	14663	10711	13130	13076	7725	28103	28573	27756	29235
CAGCCAATGAACCTGACCCA	614	16430	21369	5380	21337	18559	9942	20134	10260	10564	12163	22428	17988	28708	22371	19433	21953	23322	24191	13057	48066	48670	48446	50208
CAGCGTACGAATACCGCGGG	246	8184	6750	2391	3258	9921	5247	6822	3173	2695	3875	11809	17136	10998	13249	17007	10067	14920	7813	5484	23893	24023	23621	24319
CAGCTTCTGGATCTTACAAG	373	16047	15293	3242	8229	14774	7667	19615	7004	11702	9366	22803	18133	8706	19673	17935	16785	19796	14659	11466	33057	33770	33397	34352
CAGGACTCATCTATAGAAAG	292	5710	17727	3988	9610	9877	7136	6773	6896	4017	3533	16598	17398	16528	20294	7429	14459	18274	15398	9419	29230	30266	29329	31315
CAGGAGGCTTGGTTAGCTGA	279	7846	18453	15	7124	2707	2838	1736	2185	1873	3344	8235	12135	15960	11804	15008	12293	18151	18521	9290	28177	29109	28361	30227
CAGGCAGGGTCTGCCGCCAG	210	3311	5261	3211	5697	7964	2925	5077	1924	3182	7912	6946	14616	5943	7282	10714	8720	11405	9088	5243	19429	19688	19070	20306
CAGGTGTTGAGCGATGACGG	286	3720	18910	8267	16926	15673	4220	4096	2853	10616	6	16224	18994	16729	18083	19257	15931	18049	18084	6772	34139	34084	34417	35738
CAGTCATAGATTTAGACCAC	663	28237	21321	11839	30324	17538	9504	11763	11227	9680	8860	30573	20088	27374	23495	33422	20526	29867	22039	13242	49153	50899	50011	51460
CATATCGATACGATACGGAG	305	1370	22092	6887	10465	10156	6894	5847	12032	3	12557	20670	17499	12619	13313	22872	14050	16397	12293	11502	35154	35166	34939	36850
CATCAGCCAACTTACCAATG	444	26630	6332	12949	18711	5435	6304	9501	5035	9448	9229	18079	26291	16338	23032	22539	21728	20323	22332	6240	44903	45123	45216	46370
CATCTCGAAGCGCGCCCCCG	201	7069	6972	5597	6940	2484	2041	3145	2279	5	7737	7090	9305	5546	8945	6582	6456	8778	6750	5115	18416	18161	18468	19391
CATTATCTACATCACTGACA	626	18861	22175	2443	22281	11945	13264	18880	15909	18211	26449	28284	34707	33752	33006	39618	34505	42887	30863	20288	63193	63728	62405	66409
CATTCCAAGTGCGTCCGATG	236	8238	18952	175	2228	7863	1861	6448	531	2	14	6038	9214	12201	3573	8478	12283	19651	3570	15105	25505	25828	26321	27417
CATTGTAGGACTATACCGTA	381	7411	13156	6912	9772	11261	15049	11783	8274	2370	7392	19300	20362	21338	15635	27090	16569	19731	24586	12107	38871	40309	39374	41654
CCAACGAAGAACTTCCTGGT	424	15625	27411	16472	16923	19075	5032	2276	7862	7526	5804	19241	36017	23395	14569	17208	19752	24060	17671	10154	39188	38924	38798	41206
CCACAGCAAACACCATCCTG	400	7356	2244	15675	8248	14842	1549	5516	2022	5341	4584	21607	22137	22592	16107	22975	18320	19167	16608	10391	42954	43194	42658	45824
CCACAGCGTGCACTACCAGA	230	5212	4889	9887	18509	4032	9270	8	9	10466	8846	8621	17470	11375	13448	12164	11047	11247	14311	4565	23546	24281	23890	25185
CCACAGTCATGATGTACGGG	214	4720	8098	4	12823	7	3019	5	1007	5	4479	7194	7044	8664	12886	12428	10347	7539	7405	4611	23414	23557	23698	24045
CCACCTTACTCGGCCACCCA	363	21836	1750	1277	14166	4042	1489	9473	3075	15322	10973	12850	11025	18317	12162	14840	9234	14949	13535	7379	30632	31086	30824	32249
CCACGAGACACTGTACCAGA	306	5964	42257	5725	3935	19	4	13665	11060	5	10	9311	48104	11825	4384	2478	10442	25847	6807	6563	27311	27033	26511	28139
CCACGGGACCGAAGAGACAA	283	7790	14084	3554	6134	7562	2851	5586	2232	547	19084	12083	31399	14270	9463	11167	14901	9374	13147	6609	21825	22404	22197	23425
CCAGAAGTATTCACTGCATG	352	7764	7585	8677	11266	3258	6215	5033	7210	16999	28671	15355	15223	10029	19364	24847	19059	18444	18765	11920	35426	36601	36376	37602
CCAGCATATAATCATCCAGG	516	17696	15798	8082	27037	2324	2588	5054	10962	8481	4504	22813	23111	31220	20189	22259	20328	28876	18877	13335	42579	43913	43773	45426
CCAGTGGTACCTCAAGCATG	290	11545	2430	8946	7198	4397	10584	4524	2445	3949	1698	16622	12778	14817	16630	14674	14253	13351	11931	6925	29550	30420	29952	31333
CCCAGACACCTCCAACCCCG	325	5765	29512	11975	5	4219	497	7502	4024	1299	4360	14995	16908	16908	10189	9834	13913	35058	9715	9089	29297	29270	28873	30439
CCCCGACAATGCCCCGACAA	266	17938	5318	5686	4625	6	4245	5096	2697	3865	27	10600	11034	12511	14567	6792	8083	13135	11382	8733	22221	22865	22217	23655
CCCCGACTCTCAGCTTACCG	250	5325	16018	5358	5611	9	2823	3575	5	2049	12903	13300	11230	12954	15265	10594	6056	10769	8463	5116	24038	24450	23278	24567
CCCCTATCAACACCAACTGT	548	10756	15939	11601	9749	10085	12100	16590	9569	12202	7772	20276	28129	25700	19855	29950	20536	19389	19466	10328	48913	49746	48696	50963
CCCGAAGAAAAGGCGTCGGT	224	10329	10940	4411	12941	5911	2714	20817	8	3040	6841	8973	8199	7570	8970	9632	10573	15047	10740	4958	20993	21083	21006	21479
CCCGTGAAGAAGCAGAAGCC	354	9778	16939	3382	8185	13482	3138	4745	2884	14167	3439	15218	20662	17023	14405	21557	15950	16587	14842	7402	30115	30499	31320	32982
CCGAACGGCCGTCGTACGTC	189	8892	1882	4328	7157	13524	1667	3813	4	3775	4603	9488	13544	11820	11546	13535	5816	10974	6596	7012	20133	20221	20514	21245
CCGATGGCTACACCAATCCG	247	5234	8320	14022	9126	6762	2414	11301	1135	6877	3969	10484	15517	14528	8711	12921	9274	13624	11254	5405	19987	20143	20378	21022
CCGGCCTTGGAAGCATGTAG	351	1940	12733	1900	5197	10193	7	2560	4471	9524	4953	14196	13311	18212	12361	11989	10856	16651	13507	8763	28040	29152	27972	30337
CCTCCAAAAGTCCTCGAACT	331	8730	2272	5616	8676	2431	8103	12380	8341	4605	12338	13536	14907	12580	11943	19899	17032	10995	14050	6994	29310	29407	29581	31496
CCTCCACAGACAGTGGTACG	272	6902	8555	325	22493	9	960	5077	6417	409	11783	10694	12269	9513	9622	11122	11960	12172	10045	4728	22072	22327	21839	22861
CCTCCCTGTTTAATCGACTT	466	30015	10828	3043	7448	14022	4199	15325	2192	6116	5851	16393	15536	19238	13187	21675	20371	21080	22321	8794	43002	44013	43327	45851
CCTCTACCTCAGCTGCAATG	479	4897	14316	16846	7992	10916	12243	22299	5447	10356	12136	18800	19428	14590	10610	18480	14875	18338	18641	9165	36950	38560	37529	39494
CCTCTACTGCGATTACAGTG	452	15451	28855	2727	9672	1366	8856	4186	19981	6899	3209	19444	12606	15592	20273	26091	18924	19834	19919	10977	39539	40090	38758	40403
CCTGGAGTACAACTTCAACA	363	10483	16835	8834	9658	8484	6	3642	1201	11814	10757	19419	19572	24045	18018	16770	11028	15588	12037	10476	37408	37848	37407	40588
CCTGTGAAACGTAAGCATCA	300	10809	3595	1644	24599	15247	3988	2890	3997	4217	3882	15303	12445	10513	15364	15348	10049	12879	12038	6924	28620	28837	28761	29548
CCTGTGAGCTAACTCTTGTG	348	5638	4764	1851	4425	4405	4931	9	5687	4	15	13823	23412	11321	6621	3549	15304	22104	6059	8855	43672	46179	44703	47028
CCTTAGGTTCATTGGACATG	377	19670	11632	8783	11439	9	11991	9608	5651	12490	11869	11348	11784	15409	14981	21312	14131	21325	12038	12076	36049	36232	35669	38186
CCTTGCCCGGAGCCACAATG	292	5022	19880	6964	9	21	4108	7949	2838	1318	7	9316	48279	11183	5368	553	8425	23341	1835	3424	24083	24634	24259	25643
CCTTTAAGGAAGTAGACCCG	379	7605	17154	12295	6726	11	3270	7132	8209	9763	4693	12626	13082	16558	12029	18579	12154	14067	15554	2535	26706	26689	27000	27770
CGAAAATGGTCGCCAAGCAG	209	6608	9204	2929	2710	35	3576	6026	6216	7618	7168	12949	14302	13030	11716	12366	10921	13528	5898	6891	25925	25729	26491	27870
CGACAAAGACCACTTGACAA	383	6488	15630	7938	13776	6626	11828	3492	8221	11838	13434	20670	22326	20018	24696	16381	17379	22952	15953	10921	39954	42018	41058	42997
CGACCTCAAGCCAGCAAAGT	345	20418	20702	11934	11290	6573	10187	3602	6149	11789	8624	11964	11517	14244	9737	11319	13737	18410	14060	5852	30803	30974	31698	32827
CGCAAAAGGTCACATTGTCA	325	19607	25443	7452	6658	1094	5043	718	189	8208	8591	20454	27178	19162	19939	24852	11289	23502	20849	9360	39028	39707	39590	41512
CGCGGCAAGAAATCTGCGGG	170	2439	2155	7668	3222	5644	6080	3148	5	909	2227	8885	8545	6519	9736	8196	5729	7843	7229	4281	17588	17546	17803	18852
CGCTTACCGACGGTTCGCGA	325	11261	2990	2172	20410	7384	6	6112	5729	10353	15335	11489	11337	11441	12724	13090	9466	16754	14339	4525	27499	27996	28306	29540
CGGCTACATCAACGGCGACG	445	25635	16681	11160	5150	8691	6247	4593	1060	2460	2824	14484	18637	17214	15223	27399	15276	26857	15518	8673	37533	38769	37786	39754
CGGTGCACAAACCACCTCTG	315	7926	15769	22073	10084	14	10902	12021	2738	2436	15	10807	21755	16853	10344	14202	16973	13036	8711	6712	27901	28697	28910	29614
CGTATGATGAAGTTAAAGCT	430	17146	28698	10163	13119	16233	7387	17790	4538	14097	7859	24996	15810	19948	22016	31462	20418	33504	16776	16026	44095	45627	44377	47568
CTACAGACCAGCCTATGACC	314	28714	27480	14546	7991	5863	4234	5584	2497	11053	5488	22332	16989	14744	17625	19273	18236	19648	21776	6293	35751	35684	35624	37414
CTACGGCGACTTCGCGCCTG	235	827	7448	4992	2989	7231	3	5074	6111	12820	4882	19752	10998	14995	11829	11027	11831	13179	14534	6098	27052	27818	28290	28826
CTAGAATTATATCGCCTACG	407	9372	26412	8297	23551	10490	15324	16917	16656	2391	18825	20985	20298	16380	23021	25708	17633	18768	26644	15502	45207	46165	45766	48557
CTATCAGGTGACGTTACAAG	251	4920	15198	6588	8	1996	9261	4917	1796	9328	4505	17538	11869	12208	13212	17179	14408	27034	4840	10728	27593	28220	27684	29071
CTATTTGATGAACTGTCTGG	442	18474	24548	2544	14306	4879	9034	4018	4124	6437	16704	28233	10610	17101	20406	18822	12373	13714	19718	13657	39872	40875	40050	41515
CTCAAACATTCAATCTACCG	484	27884	15509	11083	16196	27595	2995	15779	11495	7941	12177	20618	30769	28446	30055	32107	21718	28673	21058	19950	50635	50735	50869	53491
CTCATCTACTCGGGAAAGAG	299	6046	13461	6081	6655	10823	18899	16398	6093	7969	5118	13444	15302	8443	15405	10086	8194	12850	9968	1732	25223	25771	25338	27066
CTCCACCACTGTGCGAACCA	177	7	5516	472	15	11161	3589	1870	12	4	2506	12687	6957	12190	10458	9971	11475	10199	12800	6858	24955	25752	25775	26786
CTCCACTGAACTGTCCACCG	212	11515	13588	6318	7076	5237	4	1733	1951	10893	2369	12977	11306	16148	11644	11342	14215	9424	10692	7307	28629	28687	28504	30188
CTCGCCTACTAGATTCGTAG	375	13326	4722	8982	16322	5313	3312	5539	3677	3640	15990	15305	19414	17874	14602	24437	15818	18245	15494	7815	33788	34236	33946	35951
CTCTGCGCCCGTGTTAAACG	256	9516	8967	6344	5630	5847	7004	13	10	1942	15059	11104	14807	17350	11024	12402	9700	13996	8008	3768	22262	22728	21687	23406
CTCTTACCTGCCCGACAACT	251	4	14039	2024	13729	3020	1384	5142	1398	1664	5450	9390	15804	6020	6608	6450	8466	11332	3680	8168	26497	26932	27089	28830
CTGAAGATAGTGCTCAGCCA	267	1736	12318	1057	11794	4130	5	5262	2514	2587	5495	13830	11484	13644	11618	13020	8005	16998	12583	7765	32198	32530	32797	34492
CTGACAGAAGCCGATCCGTG	281	3803	16517	5204	6929	6393	2965	19305	1724	1962	4302	12930	15128	13676	13072	11816	15869	14525	11411	9317	26536	27235	27364	28008
CTGCAGGCTGGATAACACGT	215	8745	10769	3819	8046	11669	4	10	9452	2402	7292	15316	7129	7634	16293	18041	8300	10077	13286	5960	22660	23211	23103	24439
CTGCCTATGAGCACTTCACA	392	11143	13347	3940	12813	18744	20107	6666	4906	12818	6913	15494	14851	13223	15443	19551	16457	18540	12946	8267	33085	33370	32930	34499
CTGCTAACATGCATCCGTCA	537	28853	22912	26119	13621	29832	9659	17495	3553	4853	15217	21608	22186	19835	18428	20658	18574	20600	23907	7380	44862	45581	44220	46699
CTGCTCCGGAAGAGCACTGC	262	18201	6771	3249	8869	9848	1	5541	8788	7374	20	9072	11099	16125	11441	11539	10906	11908	11470	2686	23477	23894	23982	24779
CTGCTCGAATATCTTCAGGC	406	13741	19397	3820	15052	17226	4605	14498	3866	3291	1812	17684	12649	20390	15265	16624	17187	17306	19258	12936	38156	38409	38981	40270
CTGGAAGTGGTGCAACCTGT	239	2664	5457	884	7892	5	7744	3575	3553	4845	2	13904	13137	14590	9587	21101	9637	14227	14407	5265	30650	30951	30631	32144
CTGGATAAGGATCCCTTCCA	307	19685	13441	2977	7982	17791	4374	3578	2601	8217	9991	13316	12959	18976	19410	30509	15763	19104	15384	8820	33226	34151	33399	34537
CTGTTATGACATCACAAATG	638	18896	24641	21786	31800	7477	12988	14107	7868	22247	8097	27149	23637	22701	31786	34037	24233	29774	23310	15130	51775	52624	51884	53804
CTGTTTCTCCACAGATCGCG	265	3036	8905	3038	3739	7815	2	11300	4408	2854	4416	8666	12181	12630	14984	8693	8289	12213	14240	9278	23262	23604	23718	24341
CTTAGTTTCAGACCTAACTG	338	23	18020	5111	15807	18919	3684	5342	7932	15082	1909	15935	12348	13127	23855	20375	17730	19936	18689	10936	36524	37010	36913	38667
CTTCAGCTTGTACAACCCAT	319	11590	9103	7492	16507	10	4745	5011	3100	2927	13826	17000	18293	20791	8444	17634	13075	11402	13991	6646	37761	38482	38061	39549
CTTCATACGATGAAGGTCAG	257	9053	10072	10980	2970	6570	4481	3891	3769	2207	9014	9373	10927	18614	18722	21073	9148	16068	14612	7913	31229	31496	31350	32163
CTTGGAAAAACAGAGACAAG	411	5023	19036	13996	26463	7486	9165	10245	12	8417	2670	16898	26834	22752	21170	18986	14448	21447	18352	11614	39842	40487	40223	41321
CTTTCACAGAGCATTTGTCA	509	23418	35221	4922	28446	15431	3015	21739	11233	15702	7214	20969	18377	20974	15687	19855	17669	22363	21495	11899	37782	38580	37168	39967
CTTTCAGAGGAGATAATCGG	424	9327	11649	8645	13058	3237	4903	11835	10087	9987	14029	17837	17562	16344	15368	15512	14144	21197	14902	2954	31742	32966	32729	33750
GAAAACTCACATGTAAGGGA	250	16073	18446	1400	19517	9023	9941	5179	5273	13618	3941	13944	15050	17090	15710	16196	14988	19877	13843	9246	34875	35114	35356	36840
GAAACGACCGATTACGCGCG	206	12414	11031	2104	6735	8	4580	2230	7	7710	1796	6637	9904	6482	12077	14911	7335	10513	10700	4348	18289	18761	18567	19379
GAAACGACGCGCGCCAATAT	260	2064	16362	4632	11226	8719	4211	5913	1623	388	9145	10026	16240	15091	15116	16366	12477	14029	9858	14179	32114	32948	32791	34322
GAAATAATAGTCAGCCCTGA	394	22985	20767	8026	32973	8949	9641	7246	5628	8246	16516	22030	22088	23870	22193	27354	16735	22882	15145	9300	43107	44417	43896	45947
GAACGTACATTTCTCAAGTC	498	16365	19768	8851	7353	31530	10325	4612	7809	5790	22629	27355	27988	23570	24439	23382	21420	31164	24835	13869	52784	52457	52895	54804
GAACTCAAGTGGCATAGATG	242	4623	10923	5045	8	12	7	6570	5558	5	6	8816	48692	13779	1140	1009	13051	21350	3105	5669	29290	30400	29442	30845
GAAGCGCTGATGGTCCCGCA	251	8383	19817	1726	1427	4762	2562	9775	1819	8240	17	15256	15409	11132	11627	16569	11861	18530	9273	5646	29290	29489	29137	29784
GAATCGATGGCACCCAATTG	361	18401	21472	532	5056	5171	7816	21413	13131	10597	6306	15807	21826	12225	17248	18514	13839	16439	12627	16098	32614	34411	34311	35093
GAATGTACCGCGTATCGCGA	253	3913	10779	2924	12610	9690	11427	5645	5137	19281	6082	10447	11833	12308	12773	14535	16325	14940	11290	6684	27919	28712	27554	29364
GACCGGCAGCAGCCGGCGAG	106	7140	8527	2343	883	7277	2	4618	4	4277	12	6790	7496	6175	5398	6468	6494	4370	7792	5612	13447	13458	13657	14384
GACCGTGCACTACAAGCGAG	207	11	8090	10107	13861	6877	10772	1308	1372	5009	12268	10592	10047	10882	12350	9665	10020	9321	9402	5302	18804	19251	18934	19616
GACTCGTCAATCGACGCGCG	267	12197	8642	3131	12475	15309	3	14406	6213	8	7492	11477	12046	11414	13942	20661	14798	13601	11918	9325	25944	25750	25932	27383
GACTTGGTTGCAGAGTGTCA	287	13956	21149	3906	4392	6186	4382	3531	3628	7879	8907	14560	12174	17091	15305	12321	15447	12089	9894	6174	31303	32253	31684	32558
GAGAGGTTTCCGAAGACTAA	219	11843	10284	8753	8542	9	5	3394	3443	2	5189	6134	18720	6158	5471	4003	8804	16881	12187	3603	26139	26511	25859	27119
GAGCCAATGTCTCTTGCATG	364	2846	11345	4284	3728	1366	3569	8908	5999	3651	4473	13409	26429	12027	7500	5862	14315	23844	9895	5050	36700	37820	38200	38794
GAGCTATCCAGATCACCTGG	290	8425	6785	6684	11540	13305	1513	5113	7	5	2481	14635	9637	16125	12075	11829	7438	11136	12618	8617	27376	27617	27375	28483
GAGCTCGGCGTACAGCTCCG	160	6667	11275	6	2603	5444	1717	7825	117	3367	2661	5382	13881	10167	5416	8583	5759	11578	9082	6705	19557	19582	19903	20575
GAGGCAGAAGTTTACCAACA	357	20087	28873	5591	15	8905	8676	10710	3002	26263	32	13115	19374	20758	14444	23823	14497	19322	18741	6118	34555	35587	35410	37182
GAGGGACTGATACCTTTCGG	386	13457	6421	13802	27090	2698	3074	2841	1781	9227	11490	13580	20459	13612	12957	20708	14125	19395	13789	10588	35536	36070	35964	37152
GAGTAACACAGACTCCATCA	386	14135	12103	9656	5794	16627	6	15	8309	8916	6616	22481	15045	22893	17109	25362	20455	23062	16275	10793	49098	49171	49153	50876
GAGTACCACAATGATCACCG	289	10065	18787	8336	7277	17979	7044	4909	7924	10246	3822	19795	14322	12246	13761	13656	11964	13550	12771	5500	31518	31222	31585	33112
GAGTACCCGAGTCGACGCTC	243	8620	5242	9770	13682	2973	4353	2888	5245	3849	4470	12602	9209	12008	13627	20881	10984	12735	10873	8228	25957	27022	26206	27805
GAGTCTACCCTTACCGCCAC	464	13688	15663	13818	21759	15802	13653	14467	8338	11397	5614	27128	18540	26038	11715	25532	20866	19209	16942	11122	43776	44202	44106	45497
GAGTTAGACTGGCAACGATC	336	10695	12870	16698	2253	489	3	1357	6565	15370	3786	16191	10751	14215	19070	23022	13672	15394	16734	10938	34640	35253	34318	36996
GATACCCTGATCACAGTAGG	207	9704	12170	1146	2988	8787	6626	11548	8025	3	691	11412	13587	11015	11256	9143	7797	10168	12904	8713	25382	25369	25308	26339
GATCACCACTCAGTGCCGTG	275	13856	14859	8628	7	7601	1479	11306	451	5520	11612	15657	14754	14039	16131	21587	12412	18104	13345	9063	33777	34959	34353	35931
GATCGAAAGTAAGGCCATGT	293	11344	23878	11916	9648	11588	783	8270	4884	6246	12486	18295	12427	14490	21299	22351	12136	17321	19182	8953	36447	36963	36348	38434
GATCGTGCCTTTCTCCGACA	312	21612	6354	5224	12258	7605	11455	7973	9756	1558	4243	16297	12056	16384	14232	16132	16146	12990	12840	9500	38989	40033	38636	42326
GATGATGAGGAAGATCGCTG	274	12092	10263	7649	6057	24319	8033	12353	4893	3508	14	19662	15696	15339	10147	21714	16447	24391	16090	16623	34822	34722	35499	36420
GATGGATGGACACCTCAACA	318	18674	16085	5544	18143	9267	1621	6050	8912	3778	7384	22207	17744	16508	11971	20451	15468	17050	14926	6433	34843	35241	34388	36328
GATGGCGTACGCTACACCAA	307	7876	12545	3708	10606	7808	6514	10841	5994	25707	19406	14056	12939	15308	17466	22684	14318	17739	18853	11359	30851	31383	30841	32175
GATGTGGGATCATCGATCTC	341	18509	12938	8425	10628	9141	17458	9193	6171	10512	9237	18559	16286	20402	14775	18193	12798	19852	17548	12413	40253	41339	40291	42076
GATTCCGCTATAAATGCGAG	442	22957	26214	11920	18939	13499	7319	10314	15755	14243	13045	20693	18198	19363	14594	16631	20548	20197	17413	10874	32450	33321	33337	34909
GATTCGATCGGTCGTATACG	275	4535	15167	4048	154	5063	3213	21494	3635	4167	13	13400	13553	15001	13105	15409	9983	11006	15042	11076	29770	31119	31242	31913
GATTGAGAAGCAGTACGACG	346	17600	32606	6911	14317	12367	1786	5293	9366	7099	4452	16327	15029	17276	14126	13009	22902	14801	14169	6302	35897	35130	37259	38136
GATTGAGACTCAAGACTGGT	305	23085	47270	14917	6088	9	5335	10047	3239	2499	6738	12510	15176	15001	11874	15509	11497	37443	3729	11862	33262	33685	33699	35782
GCAACTGAACCGCTTCACGG	277	9290	3209	3290	9954	5347	1610	10361	3036	5033	7342	12542	11020	11952	10323	18876	11414	10339	11300	8441	27121	27436	27040	28201
GCAATAGGTCGATAGCCCCC	373	13618	10059	5688	12152	7276	8804	4046	1316	8619	2553	15551	20531	21788	11692	14865	14965	24512	17422	9443	36124	36552	36032	39176
GCAGAATAGTTATAGTCCAG	370	13885	8094	5453	15145	9094	5564	7317	2065	13720	23	19165	21193	20526	17099	19230	23173	22935	23770	8685	41306	40833	40329	42379
GCAGACTGAGTATAAATACG	274	8071	17293	3184	3546	8583	7866	13113	11498	8962	6965	15914	17091	10918	5520	14065	15743	13228	10666	7536	30090	30407	30189	31849
GCAGAGTACAGACAAACACC	453	27299	21921	11589	19132	29580	5412	9177	4641	11532	10523	22602	33589	25326	19677	34642	22285	23396	18391	17625	49496	49914	48385	52792
GCAGCATGGCCGAATCCTCG	295	6427	11681	4516	3410	809	388	5902	6147	4739	6749	16116	18596	9788	11439	13682	13370	13903	15530	9977	25684	26111	25772	27782
GCAGCCTGAGGCGATATGTG	282	12680	6193	2976	5531	1856	5461	4202	5729	6225	13	14896	6961	11596	11930	14265	9644	9678	14219	5897	25832	26902	26440	28079
GCATGCCAACGCACCCTCAG	271	6805	23813	9135	5579	10	6932	4564	2496	2025	8	9795	13985	10518	10597	17482	7694	26837	3080	6219	22573	23421	23293	23426
GCCAAACACAATATCCCCTG	517	25069	22652	14298	13127	16475	9612	6166	5372	6413	12383	29916	23146	25232	24482	29392	22338	25912	23220	14530	50913	52829	52103	54988
GCCATACGCCGGAACCTCAG	188	8701	11285	4	6994	3589	7331	4690	3	8175	2676	10960	12540	12177	8951	8044	10149	16365	13611	4267	22014	22198	22024	23107
GCCATGACAGTTGAGACCAG	274	5258	9371	1161	5508	9700	3132	3622	856	5521	4479	7563	13067	18502	12829	15269	14858	13997	19535	7988	29153	29480	28374	30807
GCCCACGATAACCCCTGCAG	243	11137	484	2625	7965	8551	3	7539	5	9387	4712	13921	8602	7906	9049	6888	16193	12480	10041	2884	20682	20871	21023	21762
GCCGGAGGGTAAACGGACAG	210	12499	9175	5383	1813	1659	1134	5344	3231	3	2434	13681	13488	12957	9357	11645	7904	14361	9889	7498	23469	23844	22924	24922
GCCTTTGAACCATCTCATGG	487	12734	12662	13112	15092	2055	1659	13109	12049	15753	1881	18346	22296	24347	20992	22802	15726	20221	11745	9503	42580	43469	42655	44634
GCTCAACGTCAACCTCAACT	397	10904	15476	13417	8885	14091	6108	15372	14261	10673	15961	21327	23509	20106	14393	29219	17051	22181	16514	9152	38066	38485	37999	38877
GCTCACCAATAATCACGCAT	474	24696	17246	4630	13630	11659	9175	8510	9326	11223	11926	20386	19946	21643	28092	36279	22039	34983	21723	12533	51333	53001	51126	54534
GCTGGTACTTGTAATCGGGG	378	16022	4817	13988	9937	5289	8359	6502	7776	8113	1617	20546	17480	15771	20138	15879	15509	21724	17009	12724	34160	34983	34508	36106
GCTGTCCATGGAGTAGCGCG	212	16413	6607	3500	7	5027	3537	5843	3127	1197	18	10510	9467	4481	7425	5744	8716	12002	8063	2660	22131	21482	21305	22343
GCTGTGTGGAGATGTTAGCC	530	17059	24342	9602	16260	22178	3673	14854	8977	5174	8353	18734	19235	21980	24159	22823	23724	16852	21508	13592	44335	45108	44052	48116
GCTGTTGCTCAGGCTGTCGT	349	9229	14427	4584	5473	5090	1477	13231	6076	8852	3713	14926	18212	15969	17085	16178	12479	14163	14833	9470	33750	34037	33091	34800
GCTTCACAGAAGCTTTGTGA	377	1582	5610	2050	22105	6946	5338	13014	14	6740	11148	12797	7100	12097	12959	11510	10090	15131	17159	8339	31749	32188	32390	32766
GCTTCTCAAGACGGCACTGG	357	13714	14897	9324	9014	17495	2	9040	7054	5196	7522	8508	10632	10939	12922	17578	15839	10555	14496	8866	27653	27628	27944	29776
GCTTGGGTAAAACACCACCA	407	16954	13178	10151	11501	14502	6533	15276	20	12784	6514	27630	18971	17352	12329	16584	11041	19341	20684	8303	35406	36585	36268	37886
GGAACACTCTATGCCGGTGT	283	4495	14245	5076	14066	9253	7112	3884	6775	3337	2166	15810	16615	12576	10329	18701	13305	19830	13650	12097	29351	29168	29213	29826
GGAAGCCAATGGGCCTCACA	286	8567	4860	2252	10334	8003	4418	7279	5211	20514	5416	16345	12459	14972	16753	19937	10896	13915	9242	8682	30795	31244	30871	31570
GGAAGCTCAGTATCCGCTGA	171	10133	13415	2008	11	3777	6776	6373	2087	1476	13	11350	5849	9515	9605	6350	9478	16835	5468	10482	22097	22464	22056	23842
GGACAGCGAAGTTGAAAAAA	271	4890	25591	13619	10034	9795	2624	4579	7296	3953	1917	14862	9550	13270	10797	14709	14720	19413	10831	12283	27670	27457	27500	29430
GGACGTGCTGGCCGACCACG	199	11950	10186	9332	2891	2679	1738	2851	7683	1204	14	6697	21801	12271	4654	3491	11802	11610	6146	3756	24481	23567	23529	24497
GGACGTGTATCAGGAGCCCA	304	2008	13098	12911	3371	12843	5	8577	14031	12700	1409	18020	20382	14973	14261	13854	16213	16506	12963	6869	37829	39020	37495	40199
GGACTGTGGATATCGCCGTG	280	19589	8820	10170	13156	16186	3885	8	6705	3830	6371	10966	12488	8979	13319	12933	10451	10954	11625	4886	25078	25417	24654	26456
GGAGCGTCTGATTGGCGATG	240	7383	29427	6263	3215	6	167	7313	5867	2596	4	9535	10468	7619	6811	4295	13450	31307	5862	8519	25012	25823	25212	27220
GGAGCTGAAAACTAAACTGG	308	5715	7312	7503	9471	570	6711	2385	1624	5417	11604	16934	14671	12998	11613	20111	13718	18389	13954	10785	32728	33473	33062	34813
GGAGGAGAACCCACACTGTG	261	4855	15180	1963	13752	14102	3659	11052	6069	7804	5881	9801	11224	15492	10942	15637	8108	10190	16482	9625	26936	27494	26903	28419
GGAGTATCCCTGCTGATGCC	385	24019	22634	9725	7288	8951	19756	17074	1380	3452	12033	15412	12940	28797	20538	23526	15361	29865	14427	13194	41728	42544	42172	44159
GGAGTCCAGCTTGATAGCGT	312	9091	21314	3381	5061	14472	8571	8764	1151	8437	7926	19271	15721	19802	14486	19910	19022	20220	14443	15656	35144	36583	36310	37752
GGAGTGCTTGGACAACCGGG	242	14327	6726	8281	7722	18921	3	10664	4505	10025	2564	9634	9047	11150	13809	12940	9396	10499	14231	10338	22224	22592	21529	23335
GGATAGGATAAACCACCCGA	289	16774	17397	12317	13054	31981	12810	11276	1451	14862	1791	15496	14112	15565	15529	18514	14866	13478	9097	6628	31532	31407	31199	32897
GGATGACATGCCTGTCACGT	343	14931	23461	7667	13027	14308	4234	16680	2165	7004	8340	10344	15767	15933	18291	16658	15044	15457	16258	7106	36244	36411	36284	38291
GGCACTCGGAACACACGCGG	222	6056	10347	7	3219	1531	6340	13705	7	2912	5757	6744	13773	15328	11647	7466	8735	10086	5048	4333	24766	25043	24118	25853
GGCAGAGTGATACCAGCTGG	296	11455	7039	1480	8945	10454	10401	8049	10375	3760	5807	11631	14026	16882	14711	22015	12978	15519	12892	8147	31394	30469	30938	31982
GGCCACTATCCAGAAATCAG	358	12250	12292	10644	21970	6589	8045	1824	13722	700	15392	16676	8068	18660	7430	19500	14360	19424	22448	7128	30174	30728	30495	32167
GGCCCAGCGGTGGCAACGAG	153	4784	5236	6123	9717	4619	2	1953	10	2	3990	7706	7207	4271	8600	12054	9219	6578	5876	4870	18649	18944	18162	19707
GGCCGACAGAGTGATCTTGG	340	6386	12080	2577	8626	3234	5191	8315	8687	5	6061	8454	12985	20239	14039	14572	14831	18305	11338	6957	33599	34770	33328	35632
GGCTGCATGCTGACGGTAGG	353	8689	7351	3833	2948	2549	15225	1697	9	14592	8663	19570	13600	12820	15279	18670	12088	15982	8665	14165	28273	28805	28175	29782
GGGAACAAATAAGACACTCA	469	13501	20351	20387	11154	20517	4914	28026	3923	9133	17026	19666	24183	28579	24832	26780	31669	26133	18603	22143	48126	48702	47899	50774
GGGAAGAAGATGTTCTGCGG	238	9967	16122	2624	1474	2255	4144	16359	7	6471	8854	13229	16017	13799	18194	18176	10036	13767	11583	4089	25151	26117	25132	27296
GGGACTCCCGAGCGGCGCAA	189	1838	12634	1048	8580	7241	3267	2220	1674	10718	1946	10487	10194	5586	8361	11430	7926	9670	9544	7737	19785	19098	19328	20058
GGGCGTAATACGCTCGCGTC	255	10868	14973	3978	2847	8012	4423	7574	14	2518	11555	14262	13206	15437	11721	13847	11306	10808	15066	3962	26695	27176	26917	28343
GGGGCGTTTCGTACCGGCGT	339	5493	18275	1669	12226	9430	6809	2492	5343	2951	15865	9022	17762	16641	12366	17404	10515	14705	18267	3216	31522	31419	32150	33397
GGGGCTCACCAGTAGGACAG	324	8168	1763	7894	12254	3740	2042	11058	847	6230	17858	13316	18419	15749	11262	13994	9322	13102	12105	7596	27596	28108	27342	28676
GGGTACTGGAAGAGCGAGCA	324	10769	12503	9166	11489	14888	7813	12472	6910	12249	3333	12153	12665	12173	9695	11460	13060	17790	15474	9034	26930	26637	26243	28066
GGTACGACGCCCGTATGGCG	196	20446	14352	5453	6392	11994	1894	1201	7	2	2791	7833	12302	9838	6861	10321	9383	10782	6020	4041	20357	20324	20179	21310
GGTACGCGAACCGTACGTTA	371	12942	10196	12312	20702	3569	11517	10782	7462	10252	12193	13764	20510	20661	18584	19793	15366	14223	15630	8209	31914	32167	31802	32675
GGTCCTAGGGAATGCCGATA	346	9229	15017	2475	11752	4534	15730	11210	17840	0	9732	11618	23632	15570	17625	18158	13028	17177	11286	7884	30412	30711	30694	31556
GGTCTCCAGCGCCGGCCTCG	205	5067	3967	843	5785	16493	3465	9	10	1714	3144	6150	11102	11194	7298	9194	7885	9502	5450	4677	20750	20893	20896	21336
GGTGTCGGTGCCTGACCATG	232	16638	11475	3927	13317	3076	6691	923	5840	5372	3559	8992	9091	12889	10528	18990	7047	10119	4434	4760	31935	31848	31455	32765
GGTGTCGTACGACCGATGTA	260	7069	10500	12913	4398	17241	605	10007	2743	2829	9438	11954	12448	15288	9569	16069	9784	15704	12841	4962	25879	26390	26120	27855
GGTTGAGTCACGATAACTGT	359	27690	8712	18402	14249	11862	169	6923	8501	10286	6311	14432	23659	17349	13357	21075	15029	19912	18092	10512	36156	36637	36418	38249
GGTTTCTACTCACCACCGTG	279	8232	1046	1307	7608	10378	3911	2028	1276	7978	10923	13373	11017	12015	10464	13556	12070	16708	8610	6092	27386	28199	28013	29144
GTAAAAATCATTGTTGACTT	522	7782	27358	17002	33189	11260	21601	10357	6467	3143	24112	22878	32019	39942	28418	29210	28665	29574	27079	13223	61718	63771	63287	65922
GTACCCGCATCTGCACAACG	271	10	10654	416	10310	12114	640	3680	4275	2407	11934	14335	15258	14834	8713	12460	7767	14297	12658	4119	23299	24093	24085	24854
GTAGCTCAACTCAAAAGCCA	342	21291	11209	5691	9913	6922	2376	2776	3151	5727	18	20702	13694	19321	10429	26838	19175	18773	13732	9893	38491	38638	38439	40264
GTAGTGCTTATAGGGGAGCA	500	3507	13419	10823	5245	15591	14680	142	4940	16368	9704	18652	19940	23407	18154	21493	21162	25936	20653	14269	41315	42302	41404	43218
GTAGTTTACCACGTACCACT	427	11023	34346	6396	18757	11772	6995	27738	13193	5387	10522	25681	27282	27015	15912	17990	18703	25507	17665	11756	37749	37927	37917	39296
GTATAATAAATGTCACTTTG	742	36877	45805	15673	20560	28922	16311	17289	12759	22773	20795	28554	33861	35279	35360	45425	27778	38988	30510	17798	72230	74366	73352	75502
GTATTCATTGGAATAGCAGT	465	10781	15281	4707	9358	6488	8571	2437	13317	8579	8700	20168	24109	20740	17275	30423	13992	25891	29670	14752	42211	42660	42899	44416
GTCATCTGGGATCCACTACG	325	4666	5337	6	11003	2476	10717	4819	6379	6498	18301	15669	10312	19447	17043	13737	12035	20472	20808	11647	33748	34116	32851	34900
GTCTACCCTAGCAAAGACCC	256	9864	5571	5	6850	8196	2302	3260	2635	11108	18238	13026	10290	19607	14604	13937	12457	10876	11040	6742	30375	30885	30360	31766
GTGACATGGAACATCCGGAA	344	12902	14493	4770	10879	9030	5636	11974	4657	6369	11425	15640	15368	15260	14300	15685	20034	21699	18799	8183	31848	32849	32517	33685
GTGATTAGGCTGACGCCCAG	306	6996	13409	11732	8146	3822	1982	6214	1404	3802	12269	14909	13001	14556	12536	16035	12590	18342	13664	9691	34530	34858	34260	36221
GTGCTTCTGAGGGAGTGGAT	469	20059	15551	16394	10740	26311	9436	7958	13804	12800	7901	16435	21410	18082	19457	26102	16831	18983	19351	13204	45971	46608	46161	48923
GTGGAACTTTGACTTCGTCA	498	20406	22329	6894	14494	19008	4696	15482	11774	3390	15133	26689	25805	26791	22972	21336	22515	30973	19211	14342	45673	45786	46615	47881
GTGGCTACAGGACGACAACT	404	13795	31826	637	16593	9908	472	18533	1810	6199	12998	18094	7181	19731	18914	16575	13104	17233	13643	11565	32909	33769	32903	34130
GTGGGCACGAGGCAGCGCGA	201	7826	3042	9050	4803	4	8	2434	3401	2	6	8681	18989	10321	9282	12325	10694	9571	3853	2679	19941	19883	19657	21137
GTGGTCAGGCCGCTTCAAGA	254	13383	20783	8061	14679	7448	2676	2072	4394	7688	11353	12963	12402	10127	10629	12206	7393	8899	11823	6717	23831	24188	23639	25792
GTGGTGCAAGCTTACATCGG	326	15105	10608	1616	10991	2261	7	19574	10205	5393	7398	18330	14060	11159	11546	17943	10687	15782	12486	6976	32488	34018	32654	34207
GTGTAGACTTCACCGATGAG	380	8927	11495	9791	10326	7595	17169	20	8312	8845	3830	19725	16911	11380	11221	20762	8438	15716	11485	12559	30410	31271	30028	32006
GTGTCTGTATGACCCACCCG	384	4978	13484	8	16516	16573	3805	6266	2638	8	7537	15479	27092	14552	8288	10765	12849	20418	11108	11503	36418	36381	35523	37247
GTTCAAGATCTCTCCATCAG	323	12340	22448	6203	19958	10502	9889	17482	4806	11897	2924	20632	21199	16381	12617	22633	15027	16828	14595	13264	36717	38111	36972	38619
GTTCGGGCGGAAGACAGGCC	297	15149	8852	8760	5272	17731	11177	3449	2780	3486	5286	12770	9286	14366	15096	12365	9969	13440	14764	7028	30827	31753	30184	32437
GTTCGGTATAACGAAAGGTG	265	11690	15298	9130	11074	18524	5199	1207	2634	9652	18978	10511	10776	13197	15261	14774	10922	11176	18866	11008	27334	27684	27195	28568
GTTGCCATCTGGCTTCTTAG	436	6939	19717	9235	8841	19470	9	13	7969	10874	6700	16009	18363	17574	20205	20344	22019	19743	17459	9884	40153	42204	40702	42731
GTTGCTCAAAGGGCCATCCC	336	10921	13881	7598	7983	16535	1359	12793	7193	3363	4943	18386	13375	20094	17642	18488	11126	14293	15475	9462	34117	33991	33798	35869
GTTTCTGGCTGTTACTGCCA	561	5221	35966	14094	15	9345	11470	7177	11496	4653	13052	20330	78390	26895	4343	6208	16732	48665	5668	7329	44871	45831	44770	47707
TACATACATGTCTTTGGACT	528	31520	26706	18526	14755	18610	9451	17705	7761	13166	3570	22393	19370	28326	28695	31787	17698	32185	24144	13040	55127	56767	56183	59485
TACATTATAAGCTGTCACAG	534	36521	20521	8537	19258	7577	10346	16833	8931	17023	11999	21136	19249	27571	17160	33030	23307	20609	20433	17013	50743	52195	50644	54972
TACCGCTCCAGTCGTTCATG	301	6112	7512	10040	11162	5924	7237	12229	17	7057	5573	16430	17052	11471	15304	16127	9846	12754	15071	6143	31543	31955	31662	33434
TAGACGTGAACACTGACCGG	235	8756	10077	2968	2460	10029	3	2985	1335	4	5604	10539	12487	11438	9803	14868	10504	9094	13583	3887	26325	26137	25820	27450
TAGTCAACGATGAATTGGCG	400	8248	10681	9846	15185	20499	9758	1932	2798	12597	13	21082	19904	19525	17067	24546	11666	15287	12482	7305	37262	38200	36667	39212
TAGTCGTGGCTATTGTTGGA	404	17312	19915	14291	6319	9874	8261	1334	13894	6926	1198	20647	21971	20705	19236	25496	21361	20759	18807	10767	44379	45397	45650	48001
TAGTTCAAGTAAGAAAGACG	437	22010	26427	5556	10194	9911	10948	20094	4124	3046	7475	13916	11815	27512	21964	19473	17327	25096	18202	10791	43000	43057	44073	46077
TATCCACTAGGTATCATAAG	389	23743	15338	2319	15594	16533	1735	5201	1978	10873	10671	16833	21820	13976	17421	17796	20185	18887	18729	6971	38855	39283	39415	41384
TATCTGGAGGAACTGGCAAA	272	3939	31833	9103	2774	18	4	2246	2942	2450	2548	12801	62240	20083	4121	2237	10558	27586	276	6972	28038	28324	27688	29602
TATGCGGCTGCAACGAGACA	339	12530	24207	11453	7927	13364	5920	4397	2910	1201	7274	17039	14866	19470	18459	19162	12599	14189	15050	9178	34833	35154	34288	36423
TATGGAAAAGCCATTTCCCA	458	7143	23648	5803	14573	19881	11214	18101	1781	11144	17816	22158	21911	25390	28404	33530	25408	24732	27729	11837	45358	45389	45050	46069
TCACCAAGGATCCACCTCAC	487	31725	22143	8852	21948	4750	4986	6696	3203	10004	17201	16444	13476	17688	17762	21207	18937	23835	21730	12304	38518	39063	38521	40172
TCACCGATCACAAATTCATG	536	16824	16823	15632	5071	7188	2801	12417	8848	2604	6672	21542	21466	20797	24275	26356	17493	27090	18371	14236	55216	56997	56884	59394
TCACTAGCAAGCCATACAGG	458	11968	23004	12457	12830	20316	10440	6815	12070	6685	9427	16272	18257	8466	22545	29903	11643	14245	15989	10637	37495	38246	38097	40276
TCAGGATGTTGTTAAAGTCG	377	13555	22570	11312	10411	16471	3166	11265	3339	3208	5485	14451	16166	14522	10935	18527	11292	16543	14998	8367	34203	35331	34476	36784
TCATCTTGGAGCATTACGCC	490	17330	23575	4079	26181	14799	8067	9954	3328	1518	2617	15970	23171	23650	22005	28425	19725	28201	19399	10424	46299	47024	47424	50070
TCATTCATCTGTGTGTACCG	385	9547	7622	6147	4244	10819	17792	4410	6052	7733	6564	20274	20380	13748	12773	19112	17638	15477	13213	6822	36534	37385	36904	39195
TCCATCCGGCACATCCCCCA	200	8938	7338	3005	308	10	6182	17698	984	1	2628	5188	20971	7508	3362	2530	10021	10783	4343	4793	19538	20407	19940	21002
TCCCACTCATCATCCAAGGG	296	5840	19354	10021	15953	3406	12244	4027	2514	2472	4780	12406	17041	25737	13725	16927	13299	17650	9050	10489	29294	29644	29473	30861
TCGACAGCAGCATGTACCCG	531	16197	13518	12232	21596	14145	4306	14394	2629	5403	11898	11351	20408	15568	14438	19452	15412	18141	23922	15140	38334	39298	37746	40469
TCGCCATCGTAGACCGACGC	328	10897	1403	1434	9274	2736	5094	3299	1318	11109	3041	12913	12018	15529	11052	12136	12672	20356	8818	6953	26426	27517	27087	27813
TCGGACAAATGCAAGTGCAA	588	17566	31760	13017	13897	28014	10165	12923	1270	10178	23314	20036	24825	27931	18287	26399	18307	25974	19518	13448	48280	48499	48971	50922
TCTGGATGACAATGTAGAGT	406	25891	18805	2780	16992	19921	19179	9431	4318	2426	11438	12209	11867	14289	14152	18616	13098	19996	17600	11809	40874	41759	41959	43291
TCTGGCTTCAAACCACACAT	497	5438	26724	11280	13988	9803	10949	8556	1418	176	4914	25128	23446	16585	17568	26771	21377	28100	22393	6333	50265	50787	50974	53651
TCTTCCGCCCGAACAGACCG	330	2932	3633	4528	14196	7562	4	9334	4547	2393	6367	12377	12039	13149	9982	10745	9413	7572	15156	5053	26267	26973	26395	28537
TCTTTCCCCAGAATGTCGAG	405	8905	22879	10483	8459	7153	12019	13	9596	9073	9743	16465	17076	10656	15209	19352	12498	15230	14425	8143	30299	30643	29867	31231
TGAACATCAAGTCAGCAACG	312	15518	19782	7608	7162	6131	2276	2508	9	3002	6690	14339	14222	14190	10713	9346	14241	18124	18651	6413	35560	36203	35507	37897
TGAAGGTCAGTACAAACGCA	307	12499	14724	8326	14585	11905	754	16329	2393	11958	6418	13680	10890	20002	19426	15756	13417	11328	20118	13188	33369	34188	32568	35280
TGAATGTCACAGATCCATCA	557	21127	18832	8919	9020	28671	7396	27140	7038	13273	14680	32628	33574	23370	28815	38508	28220	30084	19238	13050	54839	56682	55370	61195
TGACTTAGTCGCAACTACCG	283	6561	15492	7439	1851	14	6	6268	4007	6535	6319	16123	10725	11241	12450	20512	14544	14726	11304	7971	31070	30773	30844	32071
TGAGAACCCTGGAGCACAGA	203	10681	6831	7773	3945	4328	3941	2943	8618	3112	3352	9738	12224	13223	8498	13480	6968	10470	5556	7953	22151	21933	21499	23899
TGAGACCCAGGCATACTACA	229	2151	28036	11299	13333	7654	4402	5804	2547	4841	2970	14609	15793	13908	14338	18665	12232	15683	9773	9604	31462	31948	31919	34124
TGAGCTATGACGGACAGACG	270	7563	10860	7	22176	10178	11840	1509	366	5	4750	17868	18143	13718	12962	16255	10473	10206	11949	8345	30931	31641	30969	32168
TGAGTACCCGAGTCGACGCT	317	12596	15317	2533	3506	2726	14477	10671	8033	5731	5671	15893	13564	19041	10246	16082	17560	17970	11246	7025	30586	30974	30779	32319
TGATATCTACCTGCTCAACC	485	23131	21134	13180	16550	8468	5881	11540	5845	27283	16231	30616	25737	22003	25889	28708	18749	25337	19464	14565	53826	56069	55533	57673
TGATCATCACTAAGCAAGGA	430	13548	34255	4120	7120	6186	8856	22095	5548	13957	5527	22186	29068	21909	15273	20291	22679	48831	8571	19045	42927	44946	43598	45781
TGCAAAACCTCTCAGAACAG	519	18213	38012	6853	3792	5077	21554	16353	12583	19417	91574	19551	19457	15861	19136	18058	16297	35117	13026	27113	40684	41467	41200	43160
TGCAAACCAGTCAGTACCGG	375	10897	35975	4723	16552	10446	6	15477	12402	13562	7106	18192	19711	23871	22936	17737	9873	19300	19855	15922	39231	39819	39242	41697
TGCAGATGAGTCCACCGGTG	321	17914	26140	12076	5615	5279	5542	2190	8097	4356	894	18729	47493	13487	4033	4450	11309	28169	5936	4056	28795	29692	29695	30772
TGCAGTCAACGTGACTTCCA	269	10812	8528	5185	4128	3980	8886	10420	9	8744	8714	7291	13746	11490	12742	11974	7737	11552	10048	4785	32956	33188	32927	34358
TGCCTTAGGATCGACGGAAG	389	22793	6326	16295	7852	18615	4884	10817	9148	3912	4705	19622	17792	14748	21127	17931	13992	20903	11680	9987	33081	33828	32986	34624
TGCTCCTGTGCGGAACAGGT	274	6473	11009	2151	13421	4	1291	5780	4527	4709	2867	10055	15897	17619	11020	8715	11489	13402	12984	3571	23461	23619	23973	24677
TGCTTCCATTGCTCCCGGTG	353	17102	8522	4918	20394	1313	3457	9733	1693	6984	13192	6148	14895	11152	10623	12201	11385	15447	15166	6514	25694	25837	25897	27406
TGGAAGCACGCTGCTAAGCA	349	19382	10354	11	3998	8158	7676	4413	4540	11217	11094	14520	21127	17794	22323	19348	14442	10553	19317	10200	36315	37302	36319	38014
TGGAGAGGCTGCCTCGCTGT	336	25022	19487	5979	15631	1506	7823	13474	661	7875	3298	19073	17458	12367	21956	19492	14010	18989	12459	7754	32051	32728	31377	33874
TGGAGCACGGAGACCTGTCA	350	6401	14506	19350	15520	7134	3613	6635	7	5794	10699	16684	21794	12025	20589	9118	11174	19690	14212	8548	34609	34474	34297	35207
TGGATTCTGCACCAAGCCAC	340	12424	2883	8000	9285	1673	5549	4211	4040	4	13	16948	15859	19047	10702	19394	16960	15955	15356	10316	33759	33960	33957	35034
TGGCCCGGTAGCCATAGCTT	256	6726	19008	9605	917	4258	8	5477	8	14710	5546	11944	9929	9128	10739	15195	8292	16111	9326	4381	23184	24398	24039	24362
TGTCACATGGATATAACCTA	396	21340	19492	12548	11722	15093	4089	11266	16	13425	12213	22271	21406	21736	16226	19422	20206	17543	20011	10634	46355	46517	46674	49013
TGTCATCTCTGTAAAAACTG	366	16396	27237	18106	10	17527	11432	3730	6214	3595	15733	18712	26486	20090	20299	24523	13434	24213	23365	13688	41601	41613	41608	42608
TGTCCCCACAGATCTTGCAA	369	17303	10149	10	6830	2646	13471	9937	13	3822	5345	15959	13917	12588	14551	22191	12248	16671	21797	9683	33904	33975	34334	36585
TGTCTACAACTGGACTGCAG	305	9375	23130	12199	4458	4861	6090	4085	1870	7285	13778	13593	17375	16989	17910	24521	17103	16755	12311	12828	33300	33861	33032	34989
TGTGATGTTAGATAAACAGA	429	22687	17809	5879	13	11	12848	24991	17682	20748	36368	22703	26179	20789	21833	27762	22540	35614	14282	29198	42442	42468	41995	44214
TGTGCCAAAGACCCACTCAT	443	20028	14410	15276	17160	14221	5675	10371	1894	6872	11244	14827	17490	25107	17887	21666	19879	24121	23028	16136	43054	42978	42930	45011
TGTGCTCACCAAGGTACCCG	280	2839	11493	11420	3509	3870	4911	1511	5247	2	2016	9134	15610	14982	11194	22512	11374	15624	11557	6297	29903	30054	29973	32186
TGTGTTCAAGAACGGCCGCG	179	10339	28656	1379	7	7	5017	7269	3219	1108	15	6362	10692	13562	5233	4787	10251	22709	5260	9029	23574	24279	23581	24554
TGTTGTTGTTAAGCGGCAAG	316	13360	9139	9	8085	10	4824	5389	4645	2857	709	12061	12819	11154	15434	16310	13181	10634	9304	8863	30131	30705	30306	31511
TTAATGACGAGCTCGTGGAG	513	7159	14442	14926	7170	16	13199	7991	4655	28659	59400	15270	16859	23661	21749	24870	25672	40961	15789	18625	40324	42176	41267	44246
TTAATTCCAACCAAATCCCA	638	22760	16753	30136	11181	33498	9621	19085	6875	32220	18751	27792	30289	33916	39646	36929	21904	22611	29960	9347	63690	64436	63935	66929
TTATACAGATGATATTTCGA	511	26629	30977	1729	30684	22755	13232	22864	6053	17745	19353	29845	22568	20210	30740	38426	20783	21487	24055	12469	50939	51217	49533	52490
TTATTCAGAGTGACGGCCTG	596	17107	34137	3391	16107	6578	6297	14842	16179	17059	10413	17964	24843	22768	19809	25427	23014	26786	25713	14064	44532	45901	45373	47685
TTATTCTTGTCCAGGCAAGG	446	16395	24536	6605	26534	10741	7352	20482	3980	2890	6895	20154	21047	19162	21568	23842	17874	23740	16537	7264	43050	42844	42713	45356
TTCCGGAAAGCACAGCCAGG	359	6917	7294	10329	10592	9533	7842	12717	12	5692	4775	15469	11962	11487	13858	21743	12155	19214	13016	7070	32751	33084	32901	34690
TTCCTACGGCCTGAGCCGAG	272	12748	13210	1683	12727	10409	5748	4807	3395	10018	5273	14327	15679	13972	12091	10953	10937	17387	19361	7668	26553	26902	26706	28397
TTCTAATGGCTCACACCCAG	227	2913	16	5879	5868	7523	2	10118	10944	1661	8102	15628	8530	18413	8515	13570	10658	9329	9403	9589	25071	25635	24527	26323
TTCTATAGAGCATCTATCAG	420	10111	18764	2707	12491	10976	6811	4889	12581	14388	13	21480	18269	10292	22857	21561	17439	23259	27085	19021	41495	42656	41749	44167
TTCTGTTTAGGCATCACCTG	453	8701	15731	8714	7637	7098	12835	6528	14579	7496	9017	12676	17522	25612	13850	25943	21606	19351	19607	11602	41203	42232	41704	44174
TTCTTGCAGATTCTCAAACA	439	10380	13289	6736	7788	13940	17696	13318	8368	15606	2682	21246	25406	19823	13897	26038	16020	19041	18660	10546	38755	40202	39563	40646
TTGATTCTGATGTCCCACGG	306	12987	8468	7647	5236	12	2433	13339	3968	5084	5399	14432	18352	13069	16465	12320	17703	32911	3444	8369	32071	32572	32182	33888
TTGATTCTTTCGTAGTTTGG	498	2729	27231	7502	13746	15214	11124	6564	18530	8251	13463	27223	19545	23100	26511	35384	27106	35959	22196	17353	51137	53991	53322	55703
TTGCAGGAGCTTTGCCCCAG	286	13095	7030	5352	2638	7360	1166	9892	13	2608	9638	6741	13540	13075	8426	20135	5926	11568	12235	4632	27462	27594	28082	29979
TTGCTCCTCTACCCACAACG	291	12668	3154	4018	4125	2591	2196	4740	8	4182	13	19562	15015	13384	12244	18334	13185	9853	17476	6952	28490	28776	28703	30268
TTGGAACTAATGCCGTACGG	411	11963	26058	10803	16303	11897	3945	11207	10	8609	8562	21292	20552	17116	19484	23918	18174	19430	23867	10946	44095	43964	44274	46002
TTGTCTGTGTGGAACAACGG	310	5725	14268	4003	4679	5434	6041	9	753	1756	10923	8435	16057	17772	12020	16106	12479	16214	9192	6301	27550	27629	27744	28295
TTGTGGGTCTGCCCCCACAA	483	25092	15504	4253	6400	9915	4857	9198	2556	13610	17827	20134	23970	19171	14863	15324	15729	18665	18077	7442	37425	37599	37424	39723
TTTCAAAGAGCGTGTTTCGG	348	19803	17000	3557	11217	932	15058	10184	10329	3395	14931	13318	16168	21390	18727	21026	14466	20037	14207	9984	35254	35132	34703	37119
TTTCTGTATAAAAGCCCACG	399	11371	27514	2682	19070	5363	6604	14177	7797	12806	18293	15346	18930	14572	20801	20050	14469	20565	16460	10562	42900	43762	43529	45422
TTTGTAAGCACCTACATCCA	490	16542	12534	3862	21602	6069	1720	11736	1863	13975	7518	14820	13494	12841	22186	17386	24149	24807	15984	8271	56627	56946	56186	60058
TTTGTCGGGAAGAAATCTCG	270	15	7334	6477	14553	10993	1912	2900	3559	6475	7213	10842	10820	13394	8224	11317	9991	14383	5597	4558	27791	28946	28579	30356

## Sheet: Ex vivo screening
Construct_IDs	others	Ex_Th1_Vex_pos	Ex_Th1_Ifng_neg	Ex_Th1_Ifng_low	Ex_Th1_Ifng_IM	Ex_Th1_Ifng_High	Ex_Th2_Vex_pos	Ex_Th2_IL13_neg	Ex_Th2_IL13_low	Ex_Th2_IL13_IM	Ex_Th2_IL13_High	pDNA_1	pDNA_2	pDNA_3	pDNA_4
AAACGATTTACGCGCGCTAT	888	48367	64986	38188	34089	39595	46988	56311	39992	42325	41848	57262	54390	59094	58082
AAAGAAATACTTTACCATTG	508	19	37	25	26	21	21	361	24	859	15	80322	78240	83532	82227
AAATCCAATGCATGTAGCTG	751	6707	38322	20995	3512	3053	18224	16091	15257	7375	11625	71175	67425	72445	71622
AAATCTGTGGGCTTGTGCAG	362	20	1825	1178	1129	1070	1440	2012	1257	1094	445	46662	43253	47789	46639
AACAAGTACACCAAGAGCCG	354	1967	1620	5518	2350	1233	743	1109	1178	784	2527	48908	46197	51069	48821
AACAAGTTCGAAGACCCCAG	1193	71405	101007	91208	64245	59056	86607	86971	78069	110479	105314	48644	46487	50427	50291
AACACCCACATACCGGAGAT	604	16348	13120	22142	22509	18421	19266	23358	21289	18558	14484	51890	49712	54591	53940
AACAGCCTAGCAGTCAAACC	467	343	5807	1193	1221	23	2522	2320	1739	491	1572	66108	61499	67896	66364
AACCCTCGACTTACATGGTG	359	8328	3130	3662	14755	20415	5114	6806	3653	6158	4931	37564	34942	39030	38172
AACCGCTTCGCGACGTAATA	348	4155	2523	5353	3594	8281	7049	3878	3464	3092	4880	40624	37665	41003	41588
AACTTACATGACACCTGGCT	525	422	53	388	1389	2659	1132	951	459	1029	528	66931	63997	67729	67673
AAGAGGAGCGAATACCGATA	616	26152	26120	29928	30689	25087	23831	31953	30430	32214	33163	49608	47031	51255	50215
AAGATGAACTGCGACGTGTG	307	14	31	306	13	507	9	13	16	22	9	45589	42649	46762	45678
AAGATTGGAGCACTTGCTGC	477	7310	15318	9941	5658	6502	14022	9362	7970	11663	11688	48571	47784	50944	50992
AAGCTGCTGGTGGATACGGA	276	10	594	463	14	8	7	5	17	24	9	34302	32753	34717	35201
AAGGATCCAAGGAAGCGACC	364	15	34	10	23	18	12	483	97	22	694	53334	49269	54100	53836
AAGGGTGAATCGAATTGCCA	327	15	26	11	332	729	11	7	328	776	440	41081	37842	41883	41629
AATACTTACTCTGGTTGGCA	411	15	34	10	16	15	12	11	27	29	16	57429	54216	58678	57864
AATCAATGTGAAACAAATTG	496	4682	2275	1192	1878	3834	979	3510	2569	718	4934	71835	68706	73588	73039
AATGCTGGAGAAATCAACTG	1737	108015	102525	120193	125963	108560	123125	96953	101423	130332	92490	60446	55333	62734	62375
AATGTATATAATCAGAACCA	1564	76303	107537	93002	79365	74642	98953	126769	97736	88710	75129	77247	72805	79343	77344
ACAAACTATGTCAAGTCAGA	1572	118695	59523	58988	117163	174269	92546	125059	107415	105648	74208	63660	61606	66045	65234
ACAAAGCTGAACCAGCCACG	8192	526856	677694	660812	641453	516535	674829	569089	568638	782450	689676	44839	41972	46514	44847
ACAATAACCCCTTTCACGGT	506	19	910	18	23	18	19	574	1049	1892	1226	62580	58586	63718	62793
ACAATGCCCGAATTGGAGGT	284	8	31	10	1354	16	177	800	796	1281	918	37096	34417	36536	37045
ACACAGGCTGGTCTGCCAGT	234	15	26	11	11	11	11	14	19	20	11	33986	32110	35645	34148
ACACAGTGGCCGGATCCGTG	920	59990	49660	51224	51894	51121	56589	48221	49518	64807	50616	38015	35496	39021	38767
ACACCACATTTATGTCAAGG	387	21	38	1072	437	611	626	1202	1344	1942	2005	49368	46193	50143	49181
ACAGCACAAAGGCATACTCA	578	2464	1372	2920	21	573	1387	1114	324	603	533	68125	63419	69861	67820
ACATCAACATGTCTTCGATG	578	6104	6463	2934	3371	2331	1787	3269	4273	3201	3672	67434	64073	68663	67336
ACATCTCTGCGAAGTCACGA	467	14	30	12	18	17	17	19	28	31	9	56874	52796	57428	56622
ACCAGCCGAGTCCTCCGACA	266	14	23	707	16	13	11	15	17	479	571	34415	32439	35334	33784
ACCAGGCTGACAGTTATCAC	630	23077	12264	15285	41201	39497	23059	21800	28430	29142	27660	48588	47293	50024	49546
ACCGGCGTTGTAAAAAGGGG	270	10	20	11	7	1856	10	8	17	17	7	34472	32825	35936	35080
ACCTCATGAGATAGAAAACG	461	6013	5844	1474	4747	7640	5706	3584	4484	5623	1979	52398	50177	54841	53080
ACCTGATACGTCGTCGCGTA	372	891	1803	2229	17	1884	2695	1574	218	616	80	43222	39450	43788	41943
ACGCCAGAGATGAACACTGT	312	16	32	10	13	808	15	11	16	29	10	41252	38574	41685	41364
ACGCCCCGCTTACCTAATGT	388	11	42	21	22	10	20	14	939	25	19	45176	42733	46777	44799
ACGTGACGCTGATCGTGGAG	286	11	23	6	11	13	10	7	18	17	11	29400	29456	31670	30617
ACTCTGCAGATGTTACAGTT	429	2126	2446	1082	2307	1277	2766	898	1516	3677	2218	51232	47108	51666	51310
ACTGAGAACACGAACACCAG	380	10	2503	861	14	18	674	554	420	357	762	51324	47925	51105	51031
ACTGCACGAACTTCTGCTGT	506	2371	5128	4823	1172	18	5350	11820	6195	2037	310	53338	49565	55297	54233
ACTGGGGGCTCACAACATCA	242	8	24	8	7	12	12	10	27	18	8	37138	35237	38216	36834
ACTGTAAATCTCTGCACGGT	516	334	60	17	28	26	19	19	31	467	19	61597	57935	62796	62823
ACTGTACAGTCTCACACCAA	776	18703	6212	7763	18173	12487	17180	15962	10065	13079	17130	57401	53080	57399	56730
ACTGTATCAGCTCATTGAAG	10287	555256	283420	288628	935293	1033031	641800	541772	516401	774945	633855	61662	58505	62932	61756
ACTGTCAGAGTGACTCCCGC	284	921	135	670	3730	3664	4409	1404	1349	872	1453	30701	29352	31888	31338
ACTGTGCAGTCTCAAACCAA	2076	146787	114547	121593	170006	182357	162594	130144	116981	198687	156512	40320	38964	42680	40758
ACTGTGGCCTCACTGAAGTG	263	14	25	8	14	15	13	8	12	14	9	34473	31417	34871	33649
AGAAACAGCAGGAAGTGGGA	227	5	26	11	9	5	5	8	19	13	11	32153	29590	33645	33896
AGAAAGCATCTGAACCGACC	431	1711	4923	1926	1839	1767	17	1947	1255	414	15	58190	55808	60512	59631
AGAAATACGTACATGTATGG	536	2826	3105	5504	8172	10095	8003	5039	8363	4614	7100	64692	60191	65219	64108
AGAACCTTCTAACTCCCTCA	576	3785	3714	5763	3917	4508	5412	6486	6733	5638	5163	74991	69940	75784	74113
AGAAGCACGAGTGTGAACTT	1066	48473	34708	35448	77172	95246	72364	85531	75285	68848	54816	38486	37691	40967	40545
AGAAGTCGAAGCGAGCGATC	353	2945	799	6028	793	3453	1528	2641	1986	4943	4498	44192	41484	45436	44596
AGAGAGCACAACCAATTACG	337	3995	4940	4969	3484	3113	3415	4198	4855	4854	4466	53709	50182	55215	55209
AGAGGCATATGGTACCTCTG	6211	482780	315096	392197	656347	606381	604470	486949	507446	682458	553472	46439	44684	47564	45940
AGAGGGAGGCTTCCTATCGT	447	13099	11324	14340	7568	13017	19264	10713	11800	13915	13582	46006	43301	46937	46234
AGCAAGAACATAACTCAGCG	2732	200375	223084	223905	223882	199974	217222	224154	169449	209328	188523	64276	62240	66512	65065
AGCACTCTGCATGCTTTGCT	633	8499	4989	8769	3382	5279	9153	10153	7958	18158	8964	66941	63615	68428	68084
AGCATAAAGCACCCGGAGAG	205	349	24	356	14	11	274	200	14	14	5	28706	27028	29519	29512
AGCCGAGGCGGGTCTCACGG	230	1522	2043	1431	2748	3911	4751	3273	3521	2643	6087	27085	24528	27152	26983
AGCGCGCATGTGCAACACAG	309	555	685	709	1459	3181	846	1237	387	2024	4157	36427	34287	37834	36491
AGCTTACCTGAAACTCCGGT	288	10	25	6	5	10	11	8	22	16	4	34297	32909	35920	34865
AGGAGATGCCGTAGGCGTTG	209	5	21	1	6	6	12	8	17	22	14	33198	30784	32977	32417
AGGGGCCTGGATCGTCACTG	494	5642	2003	6464	18803	15620	16911	6327	5456	13237	16617	43620	41845	43879	44361
AGGTATCCTCCGACCCACCA	317	10	34	6	19	11	10	9	25	18	24	42253	40126	43559	42235
AGTACATATTGATGTAGATG	386	973	885	3593	1036	961	2255	218	628	2212	1226	54705	51640	55575	54340
AGTACCTATCAATTGTCAGG	391	11	27	11	17	9	14	1405	1656	29	21	52253	49591	53157	52860
AGTACTCCTCCCTTGCCCAG	981	32534	142158	54322	14783	8604	51604	104810	68613	13081	8096	51388	48131	52633	51469
AGTATTTCCAAAAACTGGGT	330	1115	772	563	904	711	1227	16	576	21	896	48842	46599	50845	50553
AGTCCTACGCGCCGTAACGT	438	1685	1831	1958	1254	2056	2018	1242	681	898	1481	49403	47499	50815	49390
AGTGGTTTCAGCAATTATCG	258	10	96	281	14	10	5	7	373	14	11	35496	33483	37057	36511
AGTTGTCAGTCGTTCGATCA	417	1281	3678	3388	18	15	916	1726	1464	286	544	53126	49318	53927	52958
AGTTTACCGAATTGTCCCCG	490	424	46	346	28	16	578	1638	33	1297	1302	63215	59262	64936	62910
ATAACGTGAACAAATACATG	8715	412076	696101	678785	310037	126072	699493	1190192	1126944	295708	163787	74897	70571	75949	74825
ATAATGTGAATTTGCCCCAG	471	1089	544	1019	21	577	4464	1964	445	1029	2290	57979	54686	59090	59597
ATACCCGGGACAAAGACGGG	185	12	19	6	7	3	5	4	14	20	4	27157	26917	28717	27617
ATACGCGATGTTACGCCGAT	409	8	32	15	17	488	17	16	29	30	692	53619	50056	55328	54292
ATAGGTCACCTACGACCCGT	264	542	24	548	1057	6	1321	1022	592	4471	454	38384	36270	39894	39702
ATCAAGGCGATCTTTCCCAA	382	1258	1795	2164	184	1398	1713	365	1993	6014	3124	46405	43856	47849	47172
ATCCGTCCGTATAATTGGCG	303	852	2964	1214	2163	500	509	606	787	398	300	40441	38079	41762	40720
ATCTGATGTTCATTCGTCAG	4792	367382	271651	254484	491528	506558	382692	355815	313279	484294	403550	48018	44670	49606	48869
ATCTGTCTAACATTACGACC	765	33484	19985	21254	37019	45343	30642	20535	28148	35924	24570	63053	60774	64891	63966
ATGCTCACGATGACCGTAAG	286	10	23	13	9	3	15	7	13	19	13	38421	36202	39284	37608
ATGGCTCTATTGATCCGTTG	606	15880	16786	20150	8909	10353	20881	15265	14637	10347	12319	57874	54595	59636	58442
ATGTACCGTCACACTTCGGG	350	1124	954	94	1719	14	1632	2327	2784	2499	2403	47066	44637	48840	47624
ATGTCGCGAACCGTGCGTAA	270	12	24	9	20	14	11	4	16	19	14	33194	31557	35104	33778
ATGTCGGCGCAGACCGCGAG	183	7	26	4	10	7	10	7	13	17	13	24246	23379	25775	25177
ATGTTAATGGTCCCAATTTG	428	18	769	661	277	301	7	1149	2064	551	18	56941	54107	58264	56722
ATTATGAAGCCGGAGCCCAT	697	17418	9852	10266	32365	34930	28451	19072	17759	19946	21010	53202	51563	55302	54270
ATTATTGAGGAGCGGCACGG	653	44689	36282	28019	47267	45001	36864	42675	45728	48069	33239	28995	27201	29912	29340
ATTGGTAAGGCGGTGACAGA	521	31480	14819	25107	28280	19422	22957	24716	25635	30269	28904	37702	36599	39647	38594
CAAACCACCACTGGATCTCG	368	10	31	9	13	9	24	17	29	18	14	45011	44122	47349	46014
CAAATGGGACTCCATAGCAC	270	13	231	6	11	8	9	5	26	115	1146	38902	36585	40740	40808
CAACGTTACGCGTCCGGTAA	303	1229	1000	1514	3478	3869	1802	4555	913	605	1750	36140	35161	37474	37160
CAACTACACTCGGCTGACCT	418	2856	3553	1890	1184	2165	2734	5755	1721	2188	2352	55580	53205	56807	56585
CAACTGGAAGATCATCCGAT	311	9	32	11	11	14	9	9	20	16	11	50387	47693	52815	51627
CAAGATGTGAGCTCACATTG	284	6	20	220	7	8	542	10	13	21	774	45814	42577	47041	45659
CAAGGAAATGAAGTCTCACT	781	31847	36159	20620	39032	26473	36153	41139	39834	32765	38458	63218	60932	64289	63873
CAAGGAAATGCTCCTCGCGG	384	31840	259	4405	67259	153035	17683	3889	7187	27109	20103	24969	23704	26145	25601
CAAGTCACGCAGTTATCCAG	1113	73434	38077	42913	101558	123804	81229	95622	76800	81004	51793	41595	39515	42066	42355
CAAGTGTACAAGTCCAGGCG	220	7	18	1	8	3	13	5	11	11	8	32901	30972	33750	33049
CAATCAGAAGACTTCATGAG	8177	411577	772055	702873	292609	117407	745395	1111557	1093135	288846	131915	49797	46546	51449	49181
CACACTTCTCACATCCGGCA	380	451	2165	1414	740	11	1865	2316	670	3817	2240	49747	46249	50167	50025
CACTGCGGCCCACGAATCGA	1197	78889	233825	179565	15003	10721	107667	98238	82582	110762	82370	27262	25568	28047	27426
CACTTACTTCCAAAAACCCA	516	301	62	22	669	19	21	798	35	43	18	69019	65206	71120	70011
CAGAAGCAAAGTGTGACAGA	267	393	1397	799	1490	1553	2720	2064	788	1910	744	40767	39781	37431	38548
CAGAGATGACAACATGTTCC	379	17	390	537	16	8	147	10	20	26	528	57853	56053	59130	60345
CAGCATACCTGAGTCACCGC	256	2	27	10	13	1	9	9	17	14	6	35111	33639	36649	35851
CAGCCAATGAACCTGACCCA	542	883	2558	1689	3059	1617	2111	2016	2535	3248	3836	60978	57420	63075	61515
CAGCGTACGAATACCGCGGG	217	475	23	395	9	6	11	8	11	391	2	30270	27813	30594	30137
CAGCTTCTGGATCTTACAAG	291	10	36	12	627	11	15	605	17	21	7	42072	40984	44746	43393
CAGGACTCATCTATAGAAAG	258	581	22	9	472	4514	553	2473	15	508	421	38047	35995	39249	38448
CAGGAGGCTTGGTTAGCTGA	305	1301	27	380	15	3263	5	471	16	20	868	36474	34868	37337	37731
CAGGCAGGGTCTGCCGCCAG	168	7	14	682	12	5	2	516	12	14	822	24724	22966	24979	24403
CAGGTGTTGAGCGATGACGG	304	1903	2592	3112	10	2317	1458	3489	1952	2981	1834	43945	40906	44159	44198
CAGTCATAGATTTAGACCAC	591	5884	3678	7206	4575	4864	6557	12277	9472	8277	4455	63801	60739	65437	64516
CATATCGATACGATACGGAG	1040	76344	87519	77081	89649	79305	78182	85247	84899	82113	74758	43630	40916	44724	44450
CATCAGCCAACTTACCAATG	361	11	33	8	20	17	14	14	824	450	10	56217	53566	57809	56687
CATCTCGAAGCGCGCCCCCG	181	9	17	507	8	522	461	328	1211	605	661	21734	21002	23096	22334
CATTATCTACATCACTGACA	4782	335751	262061	236404	479447	483730	371095	350515	302256	459167	421754	77992	75863	80071	78844
CATTCCAAGTGCGTCCGATG	247	13	37	6	14	11	13	8	22	14	7	32332	30327	33267	32081
CATTGTAGGACTATACCGTA	338	6	31	16	21	15	11	13	10	22	8	49514	46548	50410	50896
CCAACGAAGAACTTCCTGGT	333	17	40	14	13	10	13	18	23	31	10	49283	47204	51854	50348
CCACAGCAAACACCATCCTG	434	4116	4538	5843	5774	5864	5483	5972	3874	3556	3604	55617	52291	57250	55979
CCACAGCGTGCACTACCAGA	198	9	14	10	12	8	12	7	8	16	9	29212	28152	29890	30194
CCACAGTCATGATGTACGGG	385	16239	7303	12048	15586	13078	16523	23567	11922	19179	10527	29918	28397	29969	29775
CCACCTTACTCGGCCACCCA	314	18	22	14	8	10	6	21	14	26	15	38715	35346	39741	38657
CCACGAGACACTGTACCAGA	229	7	22	9	11	4	10	7	11	15	9	34541	32515	34790	35241
CCACGGGACCGAAGAGACAA	205	10	16	8	5	8	6	7	13	20	6	28447	25950	28433	28480
CCAGAAGTATTCACTGCATG	340	327	25	12	292	16	15	9	17	39	20	45333	43310	47233	45777
CCAGCATATAATCATCCAGG	402	10	32	637	18	13	349	1115	549	774	15	55233	52514	56250	54933
CCAGTGGTACCTCAAGCATG	266	9	39	12	15	13	11	4	23	16	11	37430	36771	38726	38272
CCCAGACACCTCCAACCCCG	320	492	2806	3204	890	5	2397	740	202	3378	8	36891	34759	39120	37346
CCCCGACAATGCCCCGACAA	228	15	27	9	11	6	7	5	562	18	4	28742	27101	29485	28944
CCCCGACTCTCAGCTTACCG	246	9	23	6	11	6	7	4	14	15	5	30139	28615	30925	30763
CCCCTATCAACACCAACTGT	500	20	34	649	27	18	20	16	30	37	18	61434	58966	62891	62140
CCCGAAGAAAAGGCGTCGGT	189	445	3325	1730	563	10	1041	327	876	3406	1519	26359	24675	27503	26330
CCCGTGAAGAAGCAGAAGCC	1238	95298	72142	85955	107152	92154	91476	77608	67236	82303	75832	38359	36481	40058	38416
CCGAACGGCCGTCGTACGTC	175	6	842	6	206	1139	5	855	15	1478	451	25647	24045	27059	25341
CCGATGGCTACACCAATCCG	227	2119	4566	4990	921	3325	2872	3965	2670	4962	3184	25728	24116	26566	26110
CCGGCCTTGGAAGCATGTAG	337	614	20	288	12	532	1437	226	1164	18	748	36054	35131	37722	36737
CCTCCAAAAGTCCTCGAACT	331	2438	5258	4985	6983	7108	3791	6445	3604	4916	4234	35070	33918	36390	35366
CCTCCACAGACAGTGGTACG	4266	322310	239938	238211	400722	372168	381059	234483	274387	407545	415418	26857	25585	27358	26935
CCTCCCTGTTTAATCGACTT	526	5411	7294	5987	4859	1363	3441	4689	7790	3556	2328	52184	49553	53693	52524
CCTCTACCTCAGCTGCAATG	382	119	29	9	24	9	907	12	28	313	14	47486	44797	48650	47325
CCTCTACTGCGATTACAGTG	486	4823	3363	4426	6661	9632	12104	6757	7317	8163	8672	49453	46021	50414	50770
CCTGGAGTACAACTTCAACA	410	5202	1653	3944	9627	4627	4601	5538	4988	6776	3082	47372	44843	49359	47915
CCTGTGAAACGTAAGCATCA	264	14	36	5	11	12	1638	343	15	329	1168	34836	33077	35996	35322
CCTGTGAGCTAACTCTTGTG	446	4316	4741	2728	1182	14	386	4042	2008	1212	3250	55213	52287	57676	55754
CCTTAGGTTCATTGGACATG	320	8	822	513	878	12	11	14	17	18	395	43971	42655	46863	45991
CCTTGCCCGGAGCCACAATG	273	5	17	8	18	14	13	3	14	14	11	30987	28350	31859	31322
CCTTTAAGGAAGTAGACCCG	330	12	26	11	15	12	17	5	22	15	11	33935	32339	35761	34117
CGAAAATGGTCGCCAAGCAG	188	7	18	4	6	7	7	7	13	6	5	31768	31357	33844	32623
CGACAAAGACCACTTGACAA	913	67133	119699	75380	58341	52686	64825	81672	67196	62499	53679	51732	49346	52775	52768
CGACCTCAAGCCAGCAAAGT	291	5	23	10	15	10	17	6	17	20	11	38477	37236	39607	39884
CGCAAAAGGTCACATTGTCA	343	4628	6325	4463	3239	4184	5723	7011	5355	4777	5597	49635	46997	51547	49821
CGCGGCAAGAAATCTGCGGG	170	811	16	1958	767	584	530	1284	342	3223	257	21992	20816	23081	22134
CGCTTACCGACGGTTCGCGA	331	987	4893	5457	1890	1483	4495	4614	4251	1892	2586	35700	34562	36695	35649
CGGCTACATCAACGGCGACG	359	663	32	777	24	16	928	9	24	20	2170	47889	45225	49205	47928
CGGTGCACAAACCACCTCTG	268	14	27	10	17	7	13	15	15	19	8	37339	34765	38200	36999
CGTATGATGAAGTTAAAGCT	406	1488	488	51	1292	329	3997	926	2089	3039	3023	57939	55941	59675	57785
CTACAGACCAGCCTATGACC	340	981	8771	2938	2370	1284	2319	4187	2287	2072	2391	46339	43034	47416	46551
CTACGGCGACTTCGCGCCTG	263	1937	2424	1822	331	733	965	651	575	620	387	35307	33536	35912	34743
CTAGAATTATATCGCCTACG	349	3079	4846	3791	4003	1982	2623	5268	6565	1130	851	59092	56649	60600	60244
CTATCAGGTGACGTTACAAG	253	12	21	4	19	4	10	10	21	21	7	35922	33928	36635	35923
CTATTTGATGAACTGTCTGG	652	23385	25076	23732	18971	20725	23723	18115	20107	25553	24526	51563	48840	51888	51366
CTCAAACATTCAATCTACCG	429	470	27	18	20	15	13	20	19	24	15	65298	61889	67896	67141
CTCATCTACTCGGGAAAGAG	220	363	923	608	781	2787	1309	1084	244	2439	1066	33092	31701	33281	32694
CTCCACCACTGTGCGAACCA	393	28453	8770	17289	24098	25163	23061	28180	20970	23161	14587	31809	30790	32885	32588
CTCCACTGAACTGTCCACCG	233	6	21	12	10	6	12	4	10	18	10	36199	33997	37427	37119
CTCGCCTACTAGATTCGTAG	334	2321	1007	2100	2588	11	1881	777	25	1176	2574	44020	40705	44150	44094
CTCTGCGCCCGTGTTAAACG	186	4	15	9	10	5	6	2	13	8	11	28033	26878	28697	28467
CTCTTACCTGCCCGACAACT	236	9	24	8	12	7	8	5	14	11	9	33845	31832	34253	34496
CTGAAGATAGTGCTCAGCCA	270	22	28	18	16	11	22	12	26	27	12	41462	39588	43018	41884
CTGACAGAAGCCGATCCGTG	276	4	1464	3171	672	2895	3081	1993	1151	884	442	33811	32319	35152	34974
CTGCAGGCTGGATAACACGT	216	459	2447	3117	5	452	205	3194	1799	2635	1752	29339	27359	30194	30179
CTGCCTATGAGCACTTCACA	1993	109702	176417	133035	96827	103495	158774	159089	141939	157882	130858	41501	40288	43447	42814
CTGCTAACATGCATCCGTCA	2176	126425	73045	91699	195397	181312	149472	146617	108360	175322	127312	58666	55130	60017	58539
CTGCTCCGGAAGAGCACTGC	236	10	20	8	8	5	2	7	21	9	9	30457	28083	31023	30087
CTGCTCGAATATCTTCAGGC	377	10	32	7	16	9	12	12	20	23	10	50551	47310	50854	50318
CTGGAAGTGGTGCAACCTGT	275	3560	3845	2173	1634	257	4092	43	615	2071	1512	39294	37569	40073	39469
CTGGATAAGGATCCCTTCCA	381	5369	7917	5627	4617	3775	7975	7669	8432	4510	3255	43236	40962	44474	44061
CTGTTATGACATCACAAATG	831	17231	16817	23334	19910	15568	29151	30295	27492	26537	25272	67506	63970	69800	67671
CTGTTTCTCCACAGATCGCG	236	11	19	4	18	18	9	6	11	17	4	30532	28730	31091	30067
CTTAGTTTCAGACCTAACTG	335	10	30	222	372	8	13	7	12	347	625	44946	45056	49144	48314
CTTCAGCTTGTACAACCCAT	283	13	16	10	511	9	12	9	16	22	10	47836	45756	49222	48705
CTTCATACGATGAAGGTCAG	253	10	15	5	13	9	6	9	15	24	7	39705	37608	41822	40213
CTTGGAAAAACAGAGACAAG	408	2341	2118	1361	1668	3896	830	1758	1153	1876	2226	52064	49293	53431	52654
CTTTCACAGAGCATTTGTCA	367	598	37	516	18	492	507	643	18	28	15	48757	46290	50626	48972
CTTTCAGAGGAGATAATCGG	371	14	499	533	374	15	358	681	26	447	497	41099	38941	43045	42191
GAAAACTCACATGTAAGGGA	269	2306	3847	4650	1501	18	1708	6136	5104	4060	6190	44421	41923	45026	44749
GAAACGACCGATTACGCGCG	160	438	434	769	1759	376	1127	401	1113	1060	1241	23126	21558	23753	22921
GAAACGACGCGCGCCAATAT	236	10	19	9	7	5	7	3	13	17	9	39053	36453	40420	39592
GAAATAATAGTCAGCCCTGA	656	30066	11932	20165	43992	50888	37954	30635	26031	43951	31886	55269	52859	57662	55962
GAACGTACATTTCTCAAGTC	8109	694919	856634	853138	686946	466959	718542	524296	492760	849955	687881	63770	59176	65747	64078
GAACTCAAGTGGCATAGATG	291	2	31	10	7	18	13	9	22	26	13	38541	35080	39537	37843
GAAGCGCTGATGGTCCCGCA	275	2862	94	1230	5410	3368	764	617	300	928	14	36026	34106	36734	36382
GAATCGATGGCACCCAATTG	329	8	32	14	18	14	7	636	995	132	2771	42171	39020	42952	42593
GAATGTACCGCGTATCGCGA	261	1332	1231	2765	139	7	2201	3531	1592	5525	2284	35173	33283	37051	35416
GACCGGCAGCAGCCGGCGAG	491	36726	41444	38510	41719	44653	42559	45845	40910	30706	41146	16692	15320	17535	16858
GACCGTGCACTACAAGCGAG	1590	125724	153302	104808	156672	159610	147934	147565	139272	131110	130531	23619	22350	24006	24078
GACTCGTCAATCGACGCGCG	248	4536	2846	2500	2924	959	1017	3579	1577	3016	3865	32165	30101	33055	31964
GACTTGGTTGCAGAGTGTCA	514	31986	25650	29780	27963	23579	28699	23109	22727	27052	17340	40233	36994	42411	41133
GAGAGGTTTCCGAAGACTAA	1103	61374	162777	100977	50646	29600	83256	137248	86004	63743	37358	33077	31232	33706	33402
GAGCCAATGTCTCTTGCATG	402	1221	1399	558	17	448	1471	2089	1719	1042	237	48866	45855	49278	48162
GAGCTATCCAGATCACCTGG	1681	121025	198458	132039	100606	80363	134221	130753	130766	121574	126006	35671	32879	36148	35326
GAGCTCGGCGTACAGCTCCG	153	422	11	9	6	4	685	4	1158	15	432	23628	23080	25429	23697
GAGGCAGAAGTTTACCAACA	3477	266354	227722	262742	289329	310630	358151	268761	275406	418485	361638	43719	42377	46177	44910
GAGGGACTGATACCTTTCGG	369	7003	12225	10650	7328	8738	7559	10844	7234	3165	2448	45743	42101	46112	45986
GAGTAACACAGACTCCATCA	617	19696	20757	22540	18123	9015	20507	8287	11623	21337	18318	62814	58658	63220	63787
GAGTACCACAATGATCACCG	247	7	28	9	16	10	6	9	11	19	16	40059	37939	40848	40420
GAGTACCCGAGTCGACGCTC	234	3	17	7	15	6	15	11	21	20	8	33918	31708	33707	34051
GAGTCTACCCTTACCGCCAC	382	1513	2015	3715	16	1089	1501	441	2387	538	1181	56617	52303	57420	55568
GAGTTAGACTGGCAACGATC	316	10	38	16	10	8	590	13	20	15	10	44869	42608	45466	44457
GATACCCTGATCACAGTAGG	224	3070	4715	5417	2543	2018	5467	6004	6198	4382	6402	32129	29450	32899	32967
GATCACCACTCAGTGCCGTG	241	244	948	722	12	6	7	682	211	13	10	42373	41450	43734	43256
GATCGAAAGTAAGGCCATGT	280	14	27	8	10	11	10	7	25	21	14	45123	43001	47679	45518
GATCGTGCCTTTCTCCGACA	321	1324	32	2249	4355	5019	3143	4317	729	2549	2408	49169	45780	51105	49565
GATGATGAGGAAGATCGCTG	240	7	27	4	10	12	7	10	14	293	11	44222	41530	44996	44586
GATGGATGGACACCTCAACA	283	8	31	7	13	7	458	3	25	24	7	44946	41906	45807	45097
GATGGCGTACGCTACACCAA	325	5703	364	485	20008	17550	6997	3877	4107	10624	12442	38814	36961	40073	39931
GATGTGGGATCATCGATCTC	510	20675	16666	15928	32574	43766	17814	21784	18565	28826	22385	51424	48419	51768	50838
GATTCCGCTATAAATGCGAG	281	12	29	13	10	10	8	314	14	15	10	42117	40169	43024	41372
GATTCGATCGGTCGTATACG	270	638	19	5	3639	6108	1353	591	15	15	2200	38682	36542	38510	38675
GATTGAGAAGCAGTACGACG	382	3069	6739	5132	3807	1178	2237	2746	1829	6922	4346	47145	43851	47974	46583
GATTGAGACTCAAGACTGGT	281	1502	5044	3143	20	9	3623	3876	346	3536	4290	42467	40408	44131	42945
GCAACTGAACCGCTTCACGG	740	32957	130465	43640	10141	4105	25543	92983	55033	6925	7383	34514	31900	35734	34457
GCAATAGGTCGATAGCCCCC	353	15	34	13	13	15	7	10	24	26	9	46008	44487	47537	46920
GCAGAATAGTTATAGTCCAG	1051	70161	57911	49934	95410	113965	82695	69867	58535	96214	104831	52298	48880	53001	52211
GCAGACTGAGTATAAATACG	284	14	24	7	14	9	5	14	20	25	11	37708	36753	40235	39270
GCAGAGTACAGACAAACACC	396	2645	1707	320	1695	1579	15	113	1093	1984	10	61474	57047	63409	63842
GCAGCATGGCCGAATCCTCG	304	1363	4853	5028	277	249	7022	5854	2557	3338	2159	33955	31337	34336	32746
GCAGCCTGAGGCGATATGTG	438	13211	13289	11229	13072	11729	13662	15179	14088	10795	11007	33682	31152	35041	33359
GCATGCCAACGCACCCTCAG	229	8	20	6	12	6	10	8	17	12	3	28931	27298	29719	28846
GCCAAACACAATATCCCCTG	451	1911	2090	2524	1108	942	1160	2441	1459	560	586	65531	62506	68682	66486
GCCATACGCCGGAACCTCAG	185	12	21	5	8	10	9	711	15	191	2	28171	26999	29516	29051
GCCATGACAGTTGAGACCAG	383	11865	17043	15505	10716	4925	13915	12354	13630	14680	12638	36879	35721	38871	37328
GCCCACGATAACCCCTGCAG	219	264	16	5	12	3	6	397	8	10	10	25856	24212	27136	26169
GCCGGAGGGTAAACGGACAG	228	6	17	7	9	7	4	8	7	10	5	29342	28203	30332	29421
GCCTTTGAACCATCTCATGG	449	19	948	12	1976	433	13	836	993	23	17	54860	52296	56232	55547
GCTCAACGTCAACCTCAACT	371	6582	5940	6110	10278	4919	6201	6950	8354	6510	6218	47494	44756	48623	47454
GCTCACCAATAATCACGCAT	396	21	43	8	19	19	10	12	29	25	11	64437	61498	65172	64778
GCTGGTACTTGTAATCGGGG	354	2520	3334	3314	1102	2008	2258	2845	4430	4355	5717	43372	41465	43603	43215
GCTGTCCATGGAGTAGCGCG	159	5	17	10	7	8	8	426	391	1444	3	26212	24292	26357	26214
GCTGTGTGGAGATGTTAGCC	442	13	55	11	20	17	16	15	19	29	14	55900	52538	56374	55644
GCTGTTGCTCAGGCTGTCGT	1342	54838	142452	98270	44549	22398	77109	141794	88475	59023	27257	42590	38873	42359	41605
GCTTCACAGAAGCTTTGTGA	314	15	29	12	19	10	12	10	17	24	18	40638	38288	41533	40568
GCTTCTCAAGACGGCACTGG	277	11	29	12	13	6	13	8	16	15	13	34531	33199	35688	35046
GCTTGGGTAAAACACCACCA	323	7	22	11	15	505	11	8	18	20	12	45450	43805	46442	46673
GGAACACTCTATGCCGGTGT	288	5334	3043	8071	7896	2251	5471	4887	3366	6538	5925	35859	33842	37775	36323
GGAAGCCAATGGGCCTCACA	552	29343	10464	11453	80658	145331	27107	13219	10607	25283	25932	37846	36418	38206	39525
GGAAGCTCAGTATCCGCTGA	191	5	21	1	5	7	3	5	9	9	6	28483	26121	29039	29451
GGACAGCGAAGTTGAAAAAA	256	3	26	10	6	8	7	6	16	16	6	34480	32730	36321	36132
GGACGTGCTGGCCGACCACG	186	272	18	6	9	532	9	914	10	13	5	27922	26379	29829	28595
GGACGTGTATCAGGAGCCCA	325	11	3678	1133	15	1019	1597	932	349	15	2	46430	43886	47967	47985
GGACTGTGGATATCGCCGTG	241	5	23	4	8	10	11	11	9	17	7	31523	29887	32838	32387
GGAGCGTCTGATTGGCGATG	200	9	20	6	15	10	14	10	22	20	8	32059	30272	33605	32094
GGAGCTGAAAACTAAACTGG	261	12	32	12	11	14	9	12	13	17	11	43174	41105	44487	43693
GGAGGAGAACCCACACTGTG	206	6	14	9	9	6	8	8	14	24	9	33495	32001	34879	34272
GGAGTATCCCTGCTGATGCC	1934	136134	172891	141745	156405	115948	163843	183044	139611	172274	139923	54208	50644	54306	53236
GGAGTCCAGCTTGATAGCGT	246	9	17	4	12	5	636	12	11	16	9	44958	42203	46299	45127
GGAGTGCTTGGACAACCGGG	151	31	305	7	1242	1296	375	208	656	4	1432	26971	25809	28261	27323
GGATAGGATAAACCACCCGA	251	10	31	6	14	10	4	8	13	159	10	38957	36928	40507	39690
GGATGACATGCCTGTCACGT	394	4604	6709	6467	3973	4249	9239	10202	6809	8107	5895	45763	43109	47084	46133
GGCACTCGGAACACACGCGG	203	6	15	9	4	9	7	11	18	14	3	31178	29620	31914	31107
GGCAGAGTGATACCAGCTGG	1960	175844	195929	187511	173383	194090	149656	197244	121807	164680	144834	39115	36796	39012	39247
GGCCACTATCCAGAAATCAG	789	41064	128768	44678	12964	4130	32975	82314	60243	8936	5152	39235	35480	39527	39007
GGCCCAGCGGTGGCAACGAG	176	4	18	7	11	6	2	4	9	16	6	22848	21298	24059	23655
GGCCGACAGAGTGATCTTGG	316	11	35	8	16	7	13	7	25	20	12	42928	40960	44433	43459
GGCTGCATGCTGACGGTAGG	347	4859	3418	2637	10309	4635	8839	7230	5165	6809	6722	35530	34154	37275	36711
GGGAACAAATAAGACACTCA	364	11	30	9	21	14	9	9	31	39	11	58909	56190	61081	61155
GGGAAGAAGATGTTCTGCGG	2325	228809	137011	116442	297084	336569	211774	193707	178781	275283	201306	32638	30459	32171	32253
GGGACTCCCGAGCGGCGCAA	178	5	16	4	6	6	6	7	8	17	5	24445	22831	25351	25026
GGGCGTAATACGCTCGCGTC	193	9	21	4	8	10	5	10	15	19	9	33423	31542	34486	34030
GGGGCGTTTCGTACCGGCGT	361	3586	858	4027	12138	11440	6460	2566	3059	6553	5146	39553	36971	41236	39436
GGGGCTCACCAGTAGGACAG	293	3037	5278	5709	2695	2583	1886	3992	6240	4108	2999	36323	34365	37286	36244
GGGTACTGGAAGAGCGAGCA	8097	591402	713261	675783	624682	536094	686774	614187	596317	786760	647293	33129	30373	32385	33465
GGTACGACGCCCGTATGGCG	179	4	14	3	7	4	4	1	13	17	5	24613	23225	26401	25563
GGTACGCGAACCGTACGTTA	273	436	16	9	7	7	10	8	18	22	10	39390	37328	40789	40562
GGTCCTAGGGAATGCCGATA	347	2219	6220	8714	10072	7860	3446	4675	6701	7576	14595	37283	34714	38282	37427
GGTCTCCAGCGCCGGCCTCG	191	369	15	8	2	1	1510	96	410	948	579	25471	23555	26254	25668
GGTGTCGGTGCCTGACCATG	249	5	28	9	5	8	9	8	16	16	11	38809	36899	39800	39127
GGTGTCGTACGACCGATGTA	331	11548	11756	11716	7000	8970	12627	9129	13428	15749	10662	32600	30628	33975	33046
GGTTGAGTCACGATAACTGT	1445	130270	99494	111898	141114	120452	123238	107106	102651	132609	101415	45190	42544	47712	46415
GGTTTCTACTCACCACCGTG	1731	134571	114855	135226	148735	134057	127408	134478	114751	125510	108346	35478	33063	36226	35035
GTAAAAATCATTGTTGACTT	460	13	27	22	22	18	450	12	23	36	18	79329	74835	81642	81131
GTACCCGCATCTGCACAACG	195	8	18	12	9	5	9	3	22	12	8	30250	28808	30599	30412
GTAGCTCAACTCAAAAGCCA	308	16	21	10	13	12	13	7	26	17	15	50154	46399	51191	50052
GTAGTGCTTATAGGGGAGCA	1986	114998	252338	186487	71848	77179	126697	120575	86031	125830	107832	54986	51806	55951	55539
GTAGTTTACCACGTACCACT	343	535	36	8	12	10	298	7	19	18	11	48436	45573	49595	48484
GTATAATAAATGTCACTTTG	692	448	605	585	936	464	580	19	42	37	17	93628	88411	95186	95904
GTATTCATTGGAATAGCAGT	3399	247773	179711	173949	316217	321013	277462	312056	311342	269593	199198	52930	51003	55673	53973
GTCATCTGGGATCCACTACG	329	7	1741	1064	2363	1295	701	1451	661	1011	2133	42644	40485	44225	43684
GTCTACCCTAGCAAAGACCC	243	401	647	574	10	3	1002	8	13	16	5	38747	35959	40055	38884
GTGACATGGAACATCCGGAA	281	12	32	8	13	10	5	18	14	26	13	41923	39715	42125	41202
GTGATTAGGCTGACGCCCAG	1593	106809	99970	83525	148899	139958	131213	134934	116613	118202	93690	44282	42313	45652	44837
GTGCTTCTGAGGGAGTGGAT	384	14	38	20	23	20	6	13	27	36	14	59895	56401	61046	60272
GTGGAACTTTGACTTCGTCA	402	13	47	13	509	9	743	774	22	26	18	60273	56787	61820	60723
GTGGCTACAGGACGACAACT	351	16	38	12	14	9	15	7	28	25	7	43214	40679	43840	43859
GTGGGCACGAGGCAGCGCGA	167	6	14	4	7	5	4	6	8	11	7	26089	23828	25827	25424
GTGGTCAGGCCGCTTCAAGA	205	10	14	9	10	7	5	3	10	15	10	29965	28595	30727	30574
GTGGTGCAAGCTTACATCGG	277	8	491	5	16	10	2	631	13	520	11	41431	39769	42653	41890
GTGTAGACTTCACCGATGAG	338	17	2107	310	1197	11	1478	1195	476	20	935	39816	37434	39284	40114
GTGTCTGTATGACCCACCCG	513	2176	19544	10842	6104	934	13283	16650	18011	13417	11210	45933	43721	47213	46721
GTTCAAGATCTCTCCATCAG	322	8	23	11	8	9	10	7	20	17	12	48907	45166	48838	47387
GTTCGGGCGGAAGACAGGCC	208	10	13	9	10	12	8	530	276	19	7	38358	36211	39511	38508
GTTCGGTATAACGAAAGGTG	223	2267	4964	2660	5464	8	718	2548	3671	2102	3339	34720	32980	35876	34909
GTTGCCATCTGGCTTCTTAG	535	7922	7983	6160	6629	6682	7366	9197	5797	7980	11601	54118	49921	53321	54692
GTTGCTCAAAGGGCCATCCC	368	12375	4879	5896	8020	5598	7167	10679	1511	9789	11410	43750	40878	44074	43542
GTTTCTGGCTGTTACTGCCA	1398	66286	71236	79143	72644	37089	66917	78618	65624	80380	51772	57254	53567	60006	58275
TACATACATGTCTTTGGACT	511	2525	5942	6635	2975	1353	2846	2616	635	3180	4214	73159	70167	75440	72809
TACATTATAAGCTGTCACAG	462	25	48	10	16	15	17	12	28	35	13	67751	64252	68988	67290
TACCGCTCCAGTCGTTCATG	291	825	612	13	365	11	14	6	496	1153	1145	40779	37328	41399	39887
TAGACGTGAACACTGACCGG	404	11821	14200	11615	16380	12112	15384	13189	12555	15481	8117	33106	32133	35229	34392
TAGTCAACGATGAATTGGCG	325	360	36	11	19	12	9	13	31	20	14	47679	45369	49609	48769
TAGTCGTGGCTATTGTTGGA	382	1779	1679	753	543	660	2186	2402	365	3113	2334	57326	53851	58635	57277
TAGTTCAAGTAAGAAAGACG	435	1755	28	812	2883	980	1303	721	1349	1813	1767	57241	54132	58239	57338
TATCCACTAGGTATCATAAG	377	14	34	9	15	11	16	796	20	21	11	49055	45941	50792	49980
TATCTGGAGGAACTGGCAAA	1779	105786	515816	305173	4043	3392	112902	162455	110726	136745	107193	34909	32630	38133	35204
TATGCGGCTGCAACGAGACA	1811	151883	146828	137959	163236	186196	130812	148995	134571	144669	142240	43327	40998	44018	43011
TATGGAAAAGCCATTTCCCA	447	1372	4154	1650	2343	2638	2892	1890	1791	925	867	58667	54682	60091	59693
TCACCAAGGATCCACCTCAC	1356	85524	86339	75102	95327	104025	86597	91611	81181	94624	98956	47673	45863	49551	48157
TCACCGATCACAAATTCATG	690	13114	22245	23729	20397	21535	20377	24960	21278	12208	6226	70771	67479	71945	71257
TCACTAGCAAGCCATACAGG	404	2383	4303	331	1860	1159	371	1363	657	3514	2220	49535	46375	50468	49432
TCAGGATGTTGTTAAAGTCG	361	10	29	15	14	4	7	6	619	634	251	44618	42670	46120	45188
TCATCTTGGAGCATTACGCC	443	18	43	13	25	19	11	17	621	21	11	58762	55654	61051	59442
TCATTCATCTGTGTGTACCG	333	11	33	14	23	207	12	13	25	23	13	47702	44953	49683	48101
TCCATCCGGCACATCCCCCA	194	5	18	7	11	5	2	3	12	13	18	25659	24131	25788	25472
TCCCACTCATCATCCAAGGG	240	9	20	9	13	5	782	10	365	16	7	36773	34928	37909	37103
TCGACAGCAGCATGTACCCG	412	890	304	1126	17	474	2945	1007	829	2129	512	49995	46854	51175	50618
TCGCCATCGTAGACCGACGC	306	13	32	11	9	9	5	8	21	19	13	34077	32602	35103	33874
TCGGACAAATGCAAGTGCAA	506	2224	3003	3490	2519	2953	3039	3090	2847	3387	4831	63305	60890	65726	64068
TCTGGATGACAATGTAGAGT	392	10	25	9	16	9	7	11	21	21	13	52657	50180	55668	53387
TCTGGCTTCAAACCACACAT	881	35897	36224	37971	45701	39040	35796	50781	33783	40746	35837	65600	61937	66837	65150
TCTTCCGCCCGAACAGACCG	252	10	31	14	11	10	14	6	19	13	12	32896	31605	34530	33341
TCTTTCCCCAGAATGTCGAG	312	11	35	9	10	7	14	5	70	12	13	36053	35190	37808	37828
TGAACATCAAGTCAGCAACG	327	12	813	14	34	6	12	6	34	20	13	46302	43333	47501	45774
TGAAGGTCAGTACAAACGCA	253	4	26	5	16	12	13	5	16	17	8	41966	38824	43119	42455
TGAATGTCACAGATCCATCA	533	3229	7020	943	7716	9086	9337	9393	8709	3511	6949	72222	69389	73545	72718
TGACTTAGTCGCAACTACCG	290	3975	3897	6639	7242	8722	6723	3792	2262	3421	3178	39423	37380	41331	40003
TGAGAACCCTGGAGCACAGA	336	14861	20672	22045	19153	11673	24484	27911	26823	30238	28801	28053	26612	28889	28352
TGAGACCCAGGCATACTACA	742	40544	41697	34566	79831	89500	60906	51178	45207	60274	60421	40120	37503	41196	41347
TGAGCTATGACGGACAGACG	242	1056	474	1172	1674	5	737	11	1083	2670	1145	39672	37652	40903	39228
TGAGTACCCGAGTCGACGCT	281	799	1433	2913	1704	366	770	519	1593	1065	1870	39213	36893	40475	39156
TGATATCTACCTGCTCAACC	472	17	793	199	719	1049	14	420	360	389	571	70187	66920	71715	70131
TGATCATCACTAAGCAAGGA	354	623	2994	1919	16	15	2269	2664	2689	1448	679	54635	53071	56520	54905
TGCAAAACCTCTCAGAACAG	1248	63478	323825	208470	9043	13426	77392	78055	61255	89183	62478	52948	49292	55244	53319
TGCAAACCAGTCAGTACCGG	363	3475	3587	1632	994	1725	6906	4607	5812	4585	1964	50185	48165	52872	51437
TGCAGATGAGTCCACCGGTG	267	9	26	11	7	7	11	9	17	14	9	37191	35682	37732	38271
TGCAGTCAACGTGACTTCCA	259	9	881	19	12	8	878	11	10	22	11	41329	40063	43789	42070
TGCCTTAGGATCGACGGAAG	351	17	241	20	13	578	8	9	15	426	19	43609	40974	44745	43724
TGCTCCTGTGCGGAACAGGT	228	14	1275	815	7	5	9	255	14	1012	6	29875	28066	30947	30069
TGCTTCCATTGCTCCCGGTG	286	788	27	492	871	5	847	1827	741	2207	1946	33698	31665	34472	33836
TGGAAGCACGCTGCTAAGCA	352	11	1805	320	14	9	11	6	20	1391	332	46982	43906	47753	46966
TGGAGAGGCTGCCTCGCTGT	310	9	37	6	13	12	8	9	11	21	9	41067	38983	42429	41007
TGGAGCACGGAGACCTGTCA	292	12	26	7	12	14	11	10	26	28	21	44617	41907	45070	45380
TGGATTCTGCACCAAGCCAC	320	8	24	7	9	14	16	13	21	25	15	43950	40598	44128	43693
TGGCCCGGTAGCCATAGCTT	288	595	983	7	12	4	851	1732	449	349	554	29709	28366	30898	30511
TGTCACATGGATATAACCTA	431	3469	3330	4249	2641	3252	4862	3654	8626	7841	4454	57649	55756	60539	59952
TGTCATCTCTGTAAAAACTG	348	15	29	7	11	7	10	9	20	17	12	53322	50507	53986	53752
TGTCCCCACAGATCTTGCAA	5427	447954	288715	298309	551181	520724	469639	326801	343651	526059	566711	42302	40058	42964	42124
TGTCTACAACTGGACTGCAG	309	2804	3524	4448	3950	3506	2541	2997	5741	1640	1645	41895	39948	43141	43824
TGTGATGTTAGATAAACAGA	348	1690	9171	11459	12	676	2930	2767	2114	2964	4126	53583	51034	55981	55120
TGTGCCAAAGACCCACTCAT	351	476	43	2077	18	17	1151	496	22	28	239	54427	52390	56407	55077
TGTGCTCACCAAGGTACCCG	294	15	21	6	11	8	10	11	25	23	9	39140	36764	39195	38461
TGTGTTCAAGAACGGCCGCG	193	4	15	3	8	2	11	4	14	13	4	29553	27929	29839	29636
TGTTGTTGTTAAGCGGCAAG	346	12	545	13	283	8	7	10	18	1305	13	39294	37060	40028	38732
TTAATGACGAGCTCGTGGAG	640	25741	103377	74689	1720	1173	18469	12396	18208	32772	29241	53194	51501	54949	53303
TTAATTCCAACCAAATCCCA	598	1337	1585	1114	50	882	1844	517	1840	2524	2454	82230	77516	83137	81890
TTATACAGATGATATTTCGA	449	365	1861	647	140	781	454	18	778	1856	892	64314	61299	66376	64889
TTATTCAGAGTGACGGCCTG	493	8837	4023	4120	5498	3638	5145	5453	4074	5226	3642	57760	54662	59122	58283
TTATTCTTGTCCAGGCAAGG	363	19	40	18	18	16	16	14	32	23	19	54015	51431	56579	55846
TTCCGGAAAGCACAGCCAGG	337	10	29	8	20	11	12	13	20	20	12	41653	40413	42875	42788
TTCCTACGGCCTGAGCCGAG	219	9	15	8	12	10	8	5	16	12	8	34016	32135	34918	33967
TTCTAATGGCTCACACCCAG	204	4	21	7	7	12	4	7	20	9	8	30686	29919	32429	31360
TTCTATAGAGCATCTATCAG	2948	402422	510890	562130	356742	281749	96022	189043	197569	5767	2826	53858	51200	54739	54478
TTCTGTTTAGGCATCACCTG	385	538	30	11	17	244	18	12	25	29	10	54524	50661	55287	53875
TTCTTGCAGATTCTCAAACA	2404	147259	116094	104321	219530	231966	177784	187627	142305	189991	177479	51083	47926	52563	51438
TTGATTCTGATGTCCCACGG	520	11344	39423	31491	39	782	31525	21468	22600	41605	43528	42536	40186	42389	41070
TTGATTCTTTCGTAGTTTGG	626	11652	53207	30984	3255	3973	19458	26992	21346	22767	17022	68810	65576	71819	67475
TTGCAGGAGCTTTGCCCCAG	222	9	28	10	10	9	4	10	15	14	10	35711	33688	37057	35766
TTGCTCCTCTACCCACAACG	308	1666	1198	2848	737	7	545	914	1344	16	1067	36949	34834	38390	37326
TTGGAACTAATGCCGTACGG	365	13	33	20	13	11	12	10	26	22	13	56179	53823	56821	57027
TTGTCTGTGTGGAACAACGG	263	408	589	12	10	9	7	1530	17	23	11	34500	33590	36190	35817
TTGTGGGTCTGCCCCCACAA	452	19	36	239	17	10	14	13	21	30	10	48225	44634	49756	48237
TTTCAAAGAGCGTGTTTCGG	376	4735	2302	5543	6063	9425	7525	4397	5826	8028	10266	44110	42495	46260	44344
TTTCTGTATAAAAGCCCACG	442	5732	2294	3889	4729	4093	5295	4632	5335	9679	6074	53647	51804	55078	54967
TTTGTAAGCACCTACATCCA	559	3731	1179	3860	11181	1421	6534	4788	4911	5293	2944	73957	69526	74848	73523
TTTGTCGGGAAGAAATCTCG	289	470	218	530	1127	10	3356	2281	4112	1294	9	36902	33797	36853	36518

## Sheet: In vivo screening
Construct_IDs	others	Na1ve_CD4_1	Invivo_total_CD44_1	Na1ve_CD4_2	Invivo_total_CD44_2	Invivo_Tfh_neg	Invivo_Tfh_low	Invivo_Tfh_IM	Invivo_Tfh_high	Invivo_Th1_low	Invivo_Th1_IM	Invivo_Th1_high	pDNA_1	pDNA_2	pDNA_3	pDNA_4
AAACGATTTACGCGCGCTAT	1711	50832	99501	53810	128588	91453	97291	140952	141479	57877	112705	92342	51208	45964	58165	58998
AAAGAAATACTTTACCATTG	453	18	33	20	26	22	24	18	9	24	41	8	70066	65357	83268	82870
AAATCCAATGCATGTAGCTG	701	18107	3660	24206	9844	9380	6014	7943	5366	12563	4046	1086	63852	58334	72793	73235
AAATCTGTGGGCTTGTGCAG	418	2020	5449	4994	7623	4785	4785	4436	5449	1600	9955	5743	41199	37903	47272	46473
AACAAGTACACCAAGAGCCG	353	469	3849	2686	4007	6148	3551	3052	1076	1110	3000	1998	42200	37993	48354	47641
AACAAGTTCGAAGACCCCAG	5417	106264	393130	105062	471020	341679	400430	475117	557500	162927	347036	325351	41242	37292	47185	48365
AACACCCACATACCGGAGAT	523	17476	6203	20096	7622	7869	6448	7087	8097	11238	5009	1474	47182	42109	54058	53260
AACAGCCTAGCAGTCAAACC	604	3283	9334	2406	14658	11258	9409	14905	23844	4597	6686	5284	56682	51303	65467	65020
AACCCTCGACTTACATGGTG	465	7349	11494	8022	12088	12535	13320	14237	17601	6211	14017	14365	32850	29869	37825	38166
AACCGCTTCGCGACGTAATA	609	5158	19657	7413	23901	28858	20694	17091	27222	11910	24322	18402	35787	31316	40625	40802
AACTTACATGACACCTGGCT	554	553	3440	1638	3119	1570	1666	5374	2605	26	3492	1837	60264	54092	68350	68700
AAGAGGAGCGAATACCGATA	838	38972	40447	32601	49079	54261	58833	39526	36885	18687	47605	37877	43402	38766	49272	50203
AAGATGAACTGCGACGTGTG	346	523	1331	8	1434	647	1864	570	16	18	372	4	39195	36139	46813	45438
AAGATTGGAGCACTTGCTGC	509	13823	6969	10938	13494	11372	6619	15652	19823	5357	11488	9556	43840	39827	50212	50145
AAGCTGCTGGTGGATACGGA	284	791	745	656	13	506	20	9	1227	9	469	7	30792	27641	34551	35428
AAGGATCCAAGGAAGCGACC	395	11	30	12	25	11	26	20	280	23	280	13	46602	41838	52172	52911
AAGGGTGAATCGAATTGCCA	371	14	885	2065	1138	9	905	2376	2695	2470	5131	2967	35772	32187	41663	41103
AATACTTACTCTGGTTGGCA	404	20	1362	197	846	19	1637	2652	3074	22	1750	1793	50876	46230	57313	56991
AATCAATGTGAAACAAATTG	586	3108	3505	4390	4488	5930	5472	7063	9776	3630	5295	6510	63376	57070	73144	73059
AATGCTGGAGAAATCAACTG	2945	168918	150400	150914	189327	136275	158953	205084	252650	74488	138002	131270	53161	48085	61135	60992
AATGTATATAATCAGAACCA	2419	102657	124212	122802	163548	128188	123605	196077	193947	84086	114002	88988	66118	60160	76923	75310
ACAAACTATGTCAAGTCAGA	752	100324	6542	97928	13440	13728	12707	7540	7148	33773	20592	13231	58932	52936	67072	67238
ACAAAGCTGAACCAGCCACG	6961	569462	388988	573178	463693	503260	462214	453396	476979	340158	377635	326441	40258	35848	44769	45774
ACAATAACCCCTTTCACGGT	509	1144	690	597	1187	565	624	867	16	34	2633	1246	55159	50507	64210	64476
ACAATGCCCGAATTGGAGGT	253	1024	25	8	21	12	17	19	675	14	26	10	32603	30113	37697	37798
ACACAGGCTGGTCTGCCAGT	250	12	14	8	22	9	14	5	5	8	16	5	29755	27186	34916	34320
ACACAGTGGCCGGATCCGTG	1524	56979	78207	54159	115359	77902	67784	108292	124507	37908	98879	61404	32901	29758	38944	38315
ACACCACATTTATGTCAAGG	674	2293	22505	5082	19826	17322	20574	32114	39017	9622	9106	6676	44445	40794	50711	49699
ACAGCACAAAGGCATACTCA	524	416	720	14	435	1120	1515	280	24	3224	1084	990	60789	55010	69751	69398
ACATCAACATGTCTTCGATG	1068	4525	37999	7628	38481	20814	25923	56902	50449	6868	27492	25528	60689	54960	69415	68990
ACATCTCTGCGAAGTCACGA	445	24	26	16	24	20	34	19	13	21	31	23	50030	45404	57437	57329
ACCAGCCGAGTCCTCCGACA	251	15	29	13	18	13	17	10	18	14	17	11	29490	26486	34229	33864
ACCAGGCTGACAGTTATCAC	812	52800	23509	54501	33595	31988	35180	37598	30695	19789	25613	29197	43095	39529	50150	49057
ACCGGCGTTGTAAAAAGGGG	292	1235	21	748	2044	446	1141	495	9	1582	31	2273	30780	27331	35306	34149
ACCTCATGAGATAGAAAACG	642	5847	9706	5237	20101	8440	15896	13318	17879	760	14590	10220	47776	43102	53414	54055
ACCTGATACGTCGTCGCGTA	412	5969	4382	251	1146	3275	2939	3273	2776	22	1653	16	37818	33420	42798	41733
ACGCCAGAGATGAACACTGT	352	16	33	705	24	15	431	14	12	22	23	13	36341	33250	42132	41979
ACGCCCCGCTTACCTAATGT	388	13	1989	16	17	14	514	13	699	22	30	414	40070	35933	46553	45741
ACGTGACGCTGATCGTGGAG	336	13	35	8	15	10	14	10	11	15	20	10	25974	23907	30907	32369
ACTCTGCAGATGTTACAGTT	476	3799	1953	3589	3404	2830	2864	4683	4484	1843	495	963	46128	40937	51816	51937
ACTGAGAACACGAACACCAG	376	3097	296	1077	357	287	538	1972	2965	18	25	20	45085	40818	51482	51822
ACTGCACGAACTTCTGCTGT	464	5079	864	4128	3778	1374	2844	1941	470	610	399	1138	47043	43137	54222	53933
ACTGGGGGCTCACAACATCA	256	15	19	11	13	11	17	12	7	17	32	14	31230	28898	37011	36787
ACTGTAAATCTCTGCACGGT	543	21	57	602	44	20	34	34	20	18	37	17	54113	48547	63865	63147
ACTGTACAGTCTCACACCAA	1142	21378	22773	23504	27678	25091	29810	38067	41798	19203	30362	20961	50421	45859	57584	57932
ACTGTATCAGCTCATTGAAG	11690	918328	524388	950157	581827	596220	613311	567692	514430	315413	516180	433387	55772	49201	63047	62766
ACTGTCAGAGTGACTCCCGC	379	3639	4140	3925	7392	4322	7173	14520	7219	2017	8392	4236	27821	25029	32045	31338
ACTGTGCAGTCTCAAACCAA	744	147542	7612	153136	9613	11365	9184	6572	6368	7033	9033	6160	35546	32850	41869	41251
ACTGTGGCCTCACTGAAGTG	270	15	29	8	14	13	13	12	11	21	18	9	30367	26857	35719	34622
AGAAACAGCAGGAAGTGGGA	222	10	23	1	915	12	9	925	738	9	13	6	27568	25527	32582	32835
AGAAAGCATCTGAACCGACC	391	1474	1064	5914	456	827	888	466	2773	750	20	382	50414	46069	58589	58887
AGAAATACGTACATGTATGG	465	1162	384	5242	1747	546	23	23	1011	767	139	853	55914	50775	63633	63919
AGAACCTTCTAACTCCCTCA	593	4898	5058	6599	5633	5919	15354	10360	10601	6961	3227	2694	66308	59578	76870	75353
AGAAGCACGAGTGTGAACTT	915	104758	40744	92223	36333	51138	35334	47724	45046	38039	60189	45906	34763	31155	38806	39202
AGAAGTCGAAGCGAGCGATC	578	8726	19251	3430	24921	14582	23939	30978	24943	10294	19490	25246	39274	35141	43537	45634
AGAGAGCACAACCAATTACG	464	5179	12705	5478	15698	8192	7063	12310	14836	11025	13052	11702	46486	42357	53279	54000
AGAGGCATATGGTACCTCTG	4380	520079	258666	542754	353650	375793	329311	310018	240599	173287	318550	318177	41189	36769	47153	47168
AGAGGGAGGCTTCCTATCGT	930	22392	58161	24325	65796	43287	42993	79470	92296	15941	45468	41266	40564	36546	46687	46016
AGCAAGAACATAACTCAGCG	5834	250468	346899	287170	419331	334644	394028	465703	527666	178619	331216	280631	55257	51416	64215	63866
AGCACTCTGCATGCTTTGCT	711	8394	14003	10813	14653	19061	13061	14722	12867	12976	10932	16562	59716	55007	67043	68592
AGCATAAAGCACCCGGAGAG	251	727	1894	8	327	576	786	881	10	11	10	433	24935	22939	28878	29186
AGCCGAGGCGGGTCTCACGG	247	2794	2373	4104	3938	4655	4007	4702	3357	2121	5372	8705	23148	20542	27307	26928
AGCGCGCATGTGCAACACAG	447	4738	11349	4875	16230	11604	14966	12930	11210	9045	19770	15947	31952	29265	37091	37415
AGCTTACCTGAAACTCCGGT	301	17	23	15	23	8	20	11	599	12	557	4	30681	27091	35110	35076
AGGAGATGCCGTAGGCGTTG	240	12	539	11	13	7	350	10	13	13	10	240	29056	25958	32590	32666
AGGGGCCTGGATCGTCACTG	1044	30141	56647	33940	59013	38636	46585	72288	79998	21835	37635	31556	38938	35141	43166	44109
AGGTATCCTCCGACCCACCA	323	14	28	16	22	14	16	16	15	13	26	10	37611	33956	42032	42910
AGTACATATTGATGTAGATG	493	25	3674	2373	7947	7249	6898	5374	9342	23	4355	2997	48489	44828	56007	56149
AGTACCTATCAATTGTCAGG	400	15	626	10	771	8	12	17	1987	14	840	25	45989	41863	52972	52967
AGTACTCCTCCCTTGCCCAG	518	53558	3183	46925	4787	6133	4401	3236	1897	15763	4004	2422	45035	41013	51973	51463
AGTATTTCCAAAAACTGGGT	335	7	15	460	18	792	19	16	901	658	1461	12	43547	40056	49911	49180
AGTCCTACGCGCCGTAACGT	468	3530	5009	3346	3646	4734	5136	2628	2473	1898	4724	5104	43550	40268	50777	50051
AGTGGTTTCAGCAATTATCG	240	460	17	8	13	9	11	9	15	12	15	9	31784	28572	36135	35984
AGTTGTCAGTCGTTCGATCA	398	1222	2858	1846	371	136	764	1033	1043	1499	17	1032	46801	41665	53059	52644
AGTTTACCGAATTGTCCCCG	489	21	945	532	38	12	1314	1255	985	15	28	23	54965	50519	63630	62637
ATAACGTGAACAAATACATG	3386	393723	202267	408659	235197	263718	205119	198600	168488	197997	123810	47868	68617	62437	78799	77518
ATAATGTGAATTTGCCCCAG	523	3235	5492	2677	9945	8620	9100	8793	13645	3893	3869	7467	52000	47749	58999	59566
ATACCCGGGACAAAGACGGG	200	10	16	13	12	16	9	3	5	7	13	8	24422	22331	27194	28046
ATACGCGATGTTACGCCGAT	534	559	6777	712	10946	7837	7817	15638	17937	2517	9314	8954	47412	42945	54372	54046
ATAGGTCACCTACGACCCGT	277	1672	24	12	672	12	19	11	100	21	26	5	34760	30706	39534	38516
ATCAAGGCGATCTTTCCCAA	401	1904	5228	4001	1716	4089	5642	3414	1739	1363	1873	1467	39456	36820	47097	47326
ATCCGTCCGTATAATTGGCG	317	5039	1964	2300	3128	3226	2245	1150	2098	657	2301	1581	34881	32210	39751	40272
ATCTGATGTTCATTCGTCAG	9209	417398	548260	469953	669240	572883	625101	692571	626588	301883	539247	493591	42736	38032	48805	48066
ATCTGTCTAACATTACGACC	968	57355	25804	59097	34156	47429	43061	38190	33247	10749	34415	25532	55722	50597	63873	64259
ATGCTCACGATGACCGTAAG	318	8	29	13	18	6	11	7	9	16	15	9	34129	30851	39382	38683
ATGGCTCTATTGATCCGTTG	1040	17576	31475	20876	53855	34410	42858	44100	62020	35981	44841	37327	52035	47014	59244	58953
ATGTACCGTCACACTTCGGG	455	2702	3486	2276	2220	1842	1549	2329	6118	452	2585	3726	42517	37750	48233	48450
ATGTCGCGAACCGTGCGTAA	269	12	28	15	28	7	15	10	9	12	18	10	28782	27771	34833	33996
ATGTCGGCGCAGACCGCGAG	225	8	18	8	5	11	11	11	5	13	14	5	21700	20276	26229	25540
ATGTTAATGGTCCCAATTTG	541	22	5053	463	596	3411	7133	1839	4339	2382	1511	2258	51201	47239	58099	58958
ATTATGAAGCCGGAGCCCAT	1210	45037	52685	40103	54370	45842	65047	54711	47514	45064	64522	50174	47276	42973	54225	54198
ATTATTGAGGAGCGGCACGG	633	59853	22783	67380	36675	28906	26841	28949	34905	10806	26820	24235	25609	23031	29379	29448
ATTGGTAAGGCGGTGACAGA	702	28984	31198	23086	42105	39499	49669	34527	39008	24391	26545	25573	32742	30423	38188	38139
CAAACCACCACTGGATCTCG	314	13	18	15	24	7	18	9	13	14	19	11	40298	36804	47291	46627
CAAATGGGACTCCATAGCAC	215	13	1760	6	943	753	1249	4916	531	26	228	5	34466	31065	39783	39381
CAACGTTACGCGTCCGGTAA	288	2650	2615	760	1888	2512	4472	7641	9986	2554	5380	6456	33071	29489	38125	37913
CAACTACACTCGGCTGACCT	431	7023	7228	3866	6586	6614	4879	5942	8199	2810	6551	7419	48759	44847	56293	55127
CAACTGGAAGATCATCCGAT	352	14	29	17	26	15	8	9	12	16	29	16	44562	40658	51516	52082
CAAGATGTGAGCTCACATTG	303	484	362	12	1443	188	11	177	1605	6	13	1412	39452	35188	45455	45592
CAAGGAAATGAAGTCTCACT	836	34664	52216	45195	45548	55967	40907	47077	36960	23952	36666	33651	55607	51989	64384	65428
CAAGGAAATGCTCCTCGCGG	308	65236	10897	63261	9560	16434	9050	4660	2014	8053	14251	11828	21771	19917	25618	25823
CAAGTCACGCAGTTATCCAG	521	103191	9782	108242	11928	14082	12215	5774	10946	31637	14031	14063	37122	33871	42653	42593
CAAGTGTACAAGTCCAGGCG	211	12	13	8	14	11	9	12	10	17	13	8	28328	25822	33369	32987
CAATCAGAAGACTTCATGAG	3022	342323	173623	379659	220920	228719	215350	198795	178358	202745	131312	53014	44599	41446	51773	50005
CACACTTCTCACATCCGGCA	341	1728	1227	1643	1948	397	311	1491	1389	20	199	50	42315	38828	49257	49349
CACTGCGGCCCACGAATCGA	558	99767	20281	98091	28381	30407	20834	22312	19731	8113	7193	6714	24372	22186	28728	28076
CACTTACTTCCAAAAACCCA	564	782	38	29	24	25	33	26	33	25	45	20	62178	55916	69051	69655
CAGAAGCAAAGTGTGACAGA	242	1502	1376	1835	2349	3757	2364	3000	1787	3800	803	1832	35011	31916	34781	36801
CAGAGATGACAACATGTTCC	375	557	29	689	21	299	676	15	11	15	538	10	51098	47487	58815	58508
CAGCATACCTGAGTCACCGC	245	9	21	249	10	16	10	9	11	16	16	7	30590	28488	35752	35545
CAGCCAATGAACCTGACCCA	527	3230	1595	3831	1516	2177	1939	1881	4464	1459	3326	2398	52705	48539	61363	61372
CAGCGTACGAATACCGCGGG	196	5	12	8	517	8	14	14	7	10	22	12	26198	23586	30754	29946
CAGCTTCTGGATCTTACAAG	292	14	20	785	21	17	23	16	9	17	15	9	36884	34191	43238	42151
CAGGACTCATCTATAGAAAG	306	2706	5459	1764	5412	1839	7418	8519	5521	2675	3337	5509	33325	30325	38401	38579
CAGGAGGCTTGGTTAGCTGA	249	18	1085	1696	2381	2224	416	1220	1651	11	1220	2039	31864	28918	36580	36730
CAGGCAGGGTCTGCCGCCAG	162	6	14	1585	6	10	9	8	4	9	7	2	22205	19943	26094	25061
CAGGTGTTGAGCGATGACGG	348	2597	3500	2775	4240	1969	6178	6326	10168	21	5035	3737	38351	34321	44594	44174
CAGTCATAGATTTAGACCAC	809	11208	15240	12638	15136	16274	15274	23147	26101	14117	20672	24255	57646	52129	65692	64993
CATATCGATACGATACGGAG	2252	106376	158790	103125	205483	161901	173778	226509	197207	66184	144147	127141	38478	35107	43617	43240
CATCAGCCAACTTACCAATG	380	15	31	11	14	12	25	14	14	20	19	9	48732	44446	56072	56088
CATCTCGAAGCGCGCCCCCG	181	1463	3313	780	3242	908	4149	1685	2075	547	2228	4819	18993	16641	21462	21150
CATTATCTACATCACTGACA	8687	459591	484811	424241	625810	544987	627155	680499	602020	283918	509069	455624	68413	63037	79223	77609
CATTCCAAGTGCGTCCGATG	219	17	16	14	11	9	25	12	7	15	15	10	28505	25989	32633	32591
CATTGTAGGACTATACCGTA	355	16	26	12	17	18	19	16	12	855	18	9	43202	40178	50179	50077
CCAACGAAGAACTTCCTGGT	321	15	26	6	18	16	24	14	11	17	20	13	44949	40777	51943	50440
CCACAGCAAACACCATCCTG	423	6882	5262	3382	4427	2797	6373	6255	3282	11	4857	2984	47337	43935	54916	55270
CCACAGCGTGCACTACCAGA	201	732	15	9	11	6	13	7	14	10	15	3	26682	24337	30309	30474
CCACAGTCATGATGTACGGG	277	17611	2141	17260	4644	7535	4205	5893	4134	1934	4197	1167	26187	23304	30140	29431
CCACCTTACTCGGCCACCCA	333	11	22	5	14	11	12	16	15	18	17	10	33769	30631	39190	38694
CCACGAGACACTGTACCAGA	245	12	23	14	12	5	15	11	6	12	15	4	30136	27218	35139	34321
CCACGGGACCGAAGAGACAA	206	11	19	12	15	9	17	7	7	11	20	7	25178	22215	27984	28624
CCAGAAGTATTCACTGCATG	317	26	31	12	17	48	25	32	48	19	32	12	39999	36767	46552	45676
CCAGCATATAATCATCCAGG	438	21	22	16	527	1153	15	666	16	1371	28	308	48779	44653	56570	55683
CCAGTGGTACCTCAAGCATG	249	11	23	10	15	10	19	11	14	13	13	5	33946	30079	37798	37274
CCCAGACACCTCCAACCCCG	300	357	732	2953	10	1730	21	3178	2633	2876	16	11	32180	29073	36683	36554
CCCCGACAATGCCCCGACAA	207	11	22	299	707	13	19	14	16	8	19	186	25442	21947	28746	28550
CCCCGACTCTCAGCTTACCG	202	13	36	14	12	9	13	8	4	13	11	5	26144	24044	30519	30088
CCCCTATCAACACCAACTGT	491	306	32	17	32	18	31	20	15	18	30	11	54748	50346	62579	62342
CCCGAAGAAAAGGCGTCGGT	219	988	1345	492	3891	610	1698	2278	2416	1498	3004	1038	22732	20594	26835	26511
CCCGTGAAGAAGCAGAAGCC	895	137166	31483	151073	28856	38787	42245	28307	36442	20112	22969	28409	32885	30763	38792	39655
CCGAACGGCCGTCGTACGTC	166	278	928	512	1168	842	1058	1373	1014	1233	770	368	22449	20046	25742	25340
CCGATGGCTACACCAATCCG	351	7825	15669	6954	14848	15720	14299	18648	11926	1861	12295	7557	22622	20692	26544	26345
CCGGCCTTGGAAGCATGTAG	386	671	3603	2741	3526	4397	5437	1685	4659	4450	2923	2233	32449	29498	36888	36918
CCTCCAAAAGTCCTCGAACT	336	6021	4467	7710	6195	6733	4160	3620	3511	2336	3883	4979	30998	29104	35978	36876
CCTCCACAGACAGTGGTACG	2967	370293	130486	344885	177557	154072	180739	156477	156363	90945	164136	153599	23519	22203	28404	26917
CCTCCCTGTTTAATCGACTT	656	6935	16038	5742	18449	17376	17756	21747	20162	5725	17170	16669	45590	41835	53945	53926
CCTCTACCTCAGCTGCAATG	376	518	544	14	17	24	12	14	21	15	30	20	41623	37513	47642	47552
CCTCTACTGCGATTACAGTG	949	15154	39108	12060	42154	36976	46290	40746	40523	18289	47892	33985	44257	39867	50764	50327
CCTGGAGTACAACTTCAACA	550	17724	7631	9194	15470	10434	13589	9723	17728	1949	11538	8185	41109	37955	48403	48452
CCTGTGAAACGTAAGCATCA	282	14	187	566	12	1088	15	10	404	13	1020	71	30862	27970	35324	35154
CCTGTGAGCTAACTCTTGTG	450	3552	1980	586	6689	5974	2838	2663	2764	27	2982	385	49316	43736	55735	55994
CCTTAGGTTCATTGGACATG	331	16	26	14	18	17	692	484	1313	574	154	15	40270	35661	45935	44588
CCTTGCCCGGAGCCACAATG	259	16	19	5	23	7	13	12	6	10	14	8	26977	24719	30883	31411
CCTTTAAGGAAGTAGACCCG	341	13	22	12	11	5	20	16	12	17	21	15	30962	27637	35105	34427
CGAAAATGGTCGCCAAGCAG	164	5	12	5	9	3	10	9	2	7	13	3	26987	24498	30649	30177
CGACAAAGACCACTTGACAA	2672	76985	208724	66125	265639	260521	249102	276793	228127	99174	210659	199024	44462	40436	51083	51006
CGACCTCAAGCCAGCAAAGT	292	12	24	18	17	15	12	15	16	15	15	5	34024	30965	39923	39240
CGCAAAAGGTCACATTGTCA	377	5157	4112	5772	8090	11447	8694	7324	9482	3848	7184	9287	42678	38288	48622	49024
CGCGGCAAGAAATCTGCGGG	183	4484	2818	2015	4530	3694	5487	3866	3943	2326	4335	2087	19143	17360	22353	22299
CGCTTACCGACGGTTCGCGA	596	5865	31364	5698	31745	19258	31922	41071	38614	2298	17941	19516	31829	29507	36683	36416
CGGCTACATCAACGGCGACG	323	9	25	239	24	449	1387	14	16	23	591	265	40817	37348	47346	48135
CGGTGCACAAACCACCTCTG	268	10	20	12	23	10	12	14	11	9	22	10	32582	29987	37751	37999
CGTATGATGAAGTTAAAGCT	420	4038	5032	5213	8609	5739	4463	5974	7818	1230	5548	2955	49504	46859	59259	57187
CTACAGACCAGCCTATGACC	338	5652	4497	1418	4826	3147	3114	5096	6562	2658	5247	5915	40894	36151	45644	45794
CTACGGCGACTTCGCGCCTG	252	781	1040	1208	1814	869	1130	8	2	2709	1498	2659	30147	27724	35335	35414
CTAGAATTATATCGCCTACG	393	6504	8641	4145	4231	5369	3215	5742	6504	4873	6999	4609	51718	46822	58979	59413
CTATCAGGTGACGTTACAAG	283	2134	24	1891	23	8	13	7	1762	12	18	1112	31774	29192	37083	36311
CTATTTGATGAACTGTCTGG	875	30729	30473	30278	32869	37075	33336	34634	32446	16685	27720	27539	46746	42492	52516	53516
CTCAAACATTCAATCTACCG	384	14	28	541	17	19	28	14	16	17	32	13	56671	52507	65956	65887
CTCATCTACTCGGGAAAGAG	223	5210	12	2435	14	7	278	9	682	2242	341	479	28931	26778	33800	32651
CTCCACCACTGTGCGAACCA	311	28533	7693	29956	3525	7612	8170	5715	7366	5947	6367	5109	28228	25309	31495	31767
CTCCACTGAACTGTCCACCG	251	14	26	12	7	7	14	11	12	7	16	9	30875	28630	35744	35963
CTCGCCTACTAGATTCGTAG	334	2340	4631	2197	2294	3447	3150	2427	2929	1257	1613	1348	38576	34761	44328	45137
CTCTGCGCCCGTGTTAAACG	186	11	21	6	10	11	11	7	4	9	12	5	25164	22685	29109	29603
CTCTTACCTGCCCGACAACT	263	8	17	374	11	7	10	10	5	6	16	8	29840	27819	35134	33841
CTGAAGATAGTGCTCAGCCA	274	36	67	24	101	44	66	78	71	30	56	23	35787	33303	41494	41506
CTGACAGAAGCCGATCCGTG	282	2210	2999	3111	5187	4679	3720	1895	3891	10	3009	4069	28275	26068	33725	33220
CTGCAGGCTGGATAACACGT	186	2074	17	452	9	7	8	6	7	16	15	4	25466	22841	29988	29914
CTGCCTATGAGCACTTCACA	6589	154530	386487	163843	424892	327973	431800	502973	544578	223293	353380	359478	37538	32980	43178	41541
CTGCTAACATGCATCCGTCA	2115	178726	82668	169897	121764	142600	133426	95568	94114	58138	96521	102884	52098	47422	59572	58854
CTGCTCCGGAAGAGCACTGC	226	6	14	10	17	6	11	7	14	9	16	6	26580	23554	30263	30867
CTGCTCGAATATCTTCAGGC	379	508	879	1290	14	772	15	273	11	21	24	11	44353	39872	50111	48960
CTGGAAGTGGTGCAACCTGT	494	4693	18439	2186	23479	18264	19084	33748	37554	7510	17025	18837	33898	30757	39433	39303
CTGGATAAGGATCCCTTCCA	1042	17804	63061	21128	66967	35033	66042	93862	86521	19101	60091	51375	38132	35011	43260	43480
CTGTTATGACATCACAAATG	687	23648	6821	30405	12592	18532	7718	8958	7809	3656	4438	5629	61286	55098	68739	69709
CTGTTTCTCCACAGATCGCG	274	2	20	6	8	7	10	14	10	11	23	7	26930	24869	30803	30889
CTTAGTTTCAGACCTAACTG	326	795	1611	483	3110	482	2875	1622	11	1227	2023	4316	39711	37396	48420	48137
CTTCAGCTTGTACAACCCAT	296	13	15	5	15	11	17	17	8	10	26	9	41943	37760	48051	47775
CTTCATACGATGAAGGTCAG	273	12	27	8	16	12	8	8	16	10	23	9	35031	32461	40674	40939
CTTGGAAAAACAGAGACAAG	377	2011	5098	6781	4181	6387	4853	5801	2514	4077	2242	820	45046	40894	51992	51401
CTTTCACAGAGCATTTGTCA	387	623	28	12	25	14	537	865	16	19	23	18	43333	40031	50068	50157
CTTTCAGAGGAGATAATCGG	359	14	25	15	26	12	18	8	16	16	333	642	37674	33214	42361	42182
GAAAACTCACATGTAAGGGA	386	5279	16047	7856	17910	15236	19091	22873	20832	12107	17167	14033	37518	34793	43511	43652
GAAACGACCGATTACGCGCG	169	2704	581	1276	1859	360	1748	446	2217	10	666	601	20520	18067	23394	22652
GAAACGACGCGCGCCAATAT	255	7	20	15	9	12	18	7	6	12	21	6	33550	30304	38912	39560
GAAATAATAGTCAGCCCTGA	655	51000	36092	30347	31576	37754	35494	30655	38306	9743	22816	24736	47800	43015	55078	56267
GAACGTACATTTCTCAAGTC	2410	361040	112572	420620	149060	122114	140224	174202	180539	83846	123688	83786	58089	51142	66780	66824
GAACTCAAGTGGCATAGATG	266	14	21	16	11	15	14	13	9	17	13	8	32716	30208	37863	37925
GAAGCGCTGATGGTCCCGCA	312	1340	2564	3050	4932	1121	6895	5915	6995	1438	5966	4703	31162	27674	35665	36159
GAATCGATGGCACCCAATTG	294	1038	1166	104	13	708	731	8	1705	18	2412	689	38988	35233	43718	42920
GAATGTACCGCGTATCGCGA	225	1324	3757	1079	1753	2533	3596	5870	2916	1110	2917	2248	31087	28119	35470	35929
GACCGGCAGCAGCCGGCGAG	551	43206	42299	44453	46966	62160	49160	50725	41055	28992	49782	52811	14865	13295	17232	17625
GACCGTGCACTACAAGCGAG	2109	357804	126152	352796	159846	180954	150850	140930	132525	72533	115463	86980	20491	19216	23642	23056
GACTCGTCAATCGACGCGCG	344	3497	12829	1029	7881	7958	5893	6193	6334	7898	8390	8785	28012	25792	32931	32666
GACTTGGTTGCAGAGTGTCA	919	32524	42768	27796	61558	33335	40616	56330	63987	14452	33686	43401	35132	31813	40914	41243
GAGAGGTTTCCGAAGACTAA	2826	80287	181829	89541	247407	171787	204143	297435	383277	82921	139673	115887	28724	26083	33964	33134
GAGCCAATGTCTCTTGCATG	439	2789	6602	2555	5005	3161	4236	6831	6675	582	1962	1357	42383	37864	48054	48901
GAGCTATCCAGATCACCTGG	4516	119835	289605	144260	319774	225321	268017	375442	437891	189485	276367	217638	30371	27849	35434	34797
GAGCTCGGCGTACAGCTCCG	169	1866	684	89	1491	455	1343	1127	1464	12	783	319	20926	18950	24600	24627
GAGGCAGAAGTTTACCAACA	1623	381376	58738	357234	71189	79060	70898	53631	48639	81544	89035	74716	37805	35661	44750	44891
GAGGGACTGATACCTTTCGG	405	6237	8479	6599	9602	11564	8729	13937	21155	6002	9957	8555	38919	35335	45266	44817
GAGTAACACAGACTCCATCA	452	9105	1780	10653	2545	2436	2876	3513	1645	25	3090	1956	54386	50099	63086	62508
GAGTACCACAATGATCACCG	229	9	19	14	15	5	11	10	7	11	18	7	35273	32160	40158	40182
GAGTACCCGAGTCGACGCTC	229	702	19	852	10	14	22	8	12	18	15	5	29724	26350	33533	34045
GAGTCTACCCTTACCGCCAC	440	837	6864	14	4164	6329	4606	5931	5293	4481	3230	6177	48795	43868	56602	55347
GAGTTAGACTGGCAACGATC	329	19	22	11	27	12	459	15	18	17	3507	3043	39505	35691	43771	45049
GATACCCTGATCACAGTAGG	308	6264	3650	8601	12254	11515	9751	10289	12951	8265	9068	14223	28147	24736	31634	31973
GATCACCACTCAGTGCCGTG	254	12	941	17	14	1108	436	360	426	14	1055	350	36147	33426	42212	42075
GATCGAAAGTAAGGCCATGT	287	10	15	429	16	10	12	10	12	14	19	3	39557	35812	45529	45499
GATCGTGCCTTTCTCCGACA	369	5139	10102	2305	3561	4316	4907	7871	5562	3168	7920	6674	42349	38801	49542	48933
GATGATGAGGAAGATCGCTG	233	14	22	15	11	11	151	13	5	11	24	5	36980	33498	42390	42750
GATGGATGGACACCTCAACA	253	15	24	9	18	6	358	8	4	19	14	185	38033	34607	43876	43969
GATGGCGTACGCTACACCAA	455	41888	17563	24994	13026	18205	16211	23328	30275	13363	17743	12578	33635	30801	38768	38469
GATGTGGGATCATCGATCTC	584	47403	19374	43398	19646	37038	25518	22270	15473	16776	20512	21367	42372	39595	48858	47954
GATTCCGCTATAAATGCGAG	315	13	672	16	13	1369	1574	531	15	10	29	264	36848	33203	42861	42437
GATTCGATCGGTCGTATACG	334	3509	3866	3058	3719	1044	2297	3453	8404	4261	14113	7497	33759	31111	38301	38159
GATTGAGAAGCAGTACGACG	449	3383	9905	6043	12142	11008	15010	11757	12516	7498	8531	4219	40001	37129	45295	44636
GATTGAGACTCAAGACTGGT	298	5611	860	6850	1826	5664	2662	2003	1897	20	21	416	37514	33554	43183	43233
GCAACTGAACCGCTTCACGG	358	47075	2128	48596	3932	6847	3435	4094	3573	8015	1752	853	30615	27982	34669	35177
GCAATAGGTCGATAGCCCCC	329	12	32	11	17	14	18	15	18	15	19	5	40275	37605	46121	46248
GCAGAATAGTTATAGTCCAG	1444	173221	77795	186862	103975	123681	95480	94402	89455	50516	76455	46715	44757	40310	50919	51468
GCAGACTGAGTATAAATACG	226	16	16	1	6	13	12	12	8	11	15	8	32627	30181	38325	38821
GCAGAGTACAGACAAACACC	376	1513	1488	2342	1312	21	12	2202	20	1557	684	13	53220	48089	61344	62009
GCAGCATGGCCGAATCCTCG	483	4443	17538	4603	22179	14328	17550	28255	23142	5369	13893	16719	29455	26306	34026	34383
GCAGCCTGAGGCGATATGTG	494	15627	16144	15534	20046	20726	16648	18200	24396	11404	14545	11790	30026	26944	34738	33453
GCATGCCAACGCACCCTCAG	225	7	18	5	12	3	6	9	7	11	15	12	25397	22798	29475	29398
GCCAAACACAATATCCCCTG	463	1247	614	17	668	732	24	235	19	24	123	1129	57249	52794	67119	66437
GCCATACGCCGGAACCTCAG	222	17	1750	139	1083	658	1497	3672	2149	3685	2812	1239	24932	23047	29522	29219
GCCATGACAGTTGAGACCAG	1100	14414	62024	20199	77210	69566	75546	84932	76878	36505	78730	65145	32606	30252	38123	37484
GCCCACGATAACCCCTGCAG	196	9	22	480	14	8	11	10	10	6	10	3	22525	20169	25376	25932
GCCGGAGGGTAAACGGACAG	199	8	19	311	9	4	9	6	10	12	16	6	26376	23850	30290	30575
GCCTTTGAACCATCTCATGG	492	20	294	938	933	21	30	1040	17	25	616	773	49074	45518	56177	56821
GCTCAACGTCAACCTCAACT	729	9892	30009	5831	42205	38989	44153	35063	39954	18324	41616	40488	41564	36499	47668	46684
GCTCACCAATAATCACGCAT	388	14	30	16	24	14	28	603	16	17	29	19	55609	51418	63941	63785
GCTGGTACTTGTAATCGGGG	346	5943	962	3526	1616	2674	2297	1302	1244	17	3101	630	37769	34478	43097	42493
GCTGTCCATGGAGTAGCGCG	190	5	12	648	15	7	9	8	5	3	16	4	22368	19756	26300	25474
GCTGTGTGGAGATGTTAGCC	471	23	42	15	30	11	25	26	11	25	32	10	47198	43054	54276	55226
GCTGTTGCTCAGGCTGTCGT	3367	79553	170857	80154	233698	162042	182303	295282	338950	83633	132091	103480	36328	32731	41572	40914
GCTTCACAGAAGCTTTGTGA	298	11	28	12	14	17	23	15	11	23	18	6	35953	32876	41374	42099
GCTTCTCAAGACGGCACTGG	263	828	25	8	14	15	16	12	13	10	23	4	31049	27643	35070	35420
GCTTGGGTAAAACACCACCA	347	25	22	880	18	14	18	11	17	21	25	7	41030	36725	46324	46524
GGAACACTCTATGCCGGTGT	514	8039	24432	6461	33570	17627	25244	39025	48517	14141	22828	13218	31456	29203	37218	35933
GGAAGCCAATGGGCCTCACA	497	69008	11832	76306	18030	25594	18170	13980	18360	20715	25197	14174	33322	29835	37929	39030
GGAAGCTCAGTATCCGCTGA	156	4	21	5	12	2	7	5	3	10	12	5	24544	21832	28297	28183
GGACAGCGAAGTTGAAAAAA	207	6	16	7	17	6	11	6	8	9	19	4	29833	26476	34709	35463
GGACGTGCTGGCCGACCACG	184	5	6	1367	133	88	1412	721	5	3	479	3	24688	21667	28576	28981
GGACGTGTATCAGGAGCCCA	353	2350	6839	43	7522	5384	7999	6728	8176	8	6542	6651	41469	37424	48127	48114
GGACTGTGGATATCGCCGTG	210	13	119	9	900	8	477	10	4	8	385	7	26559	24398	31389	31425
GGAGCGTCTGATTGGCGATG	209	9	14	6	8	4	7	10	6	12	9	4	26979	25023	31262	32564
GGAGCTGAAAACTAAACTGG	305	6	17	6	19	7	18	9	10	11	13	11	36931	33813	42903	43009
GGAGGAGAACCCACACTGTG	185	6	15	4	10	10	10	8	5	13	15	10	29052	26604	33537	33903
GGAGTATCCCTGCTGATGCC	3992	159782	282630	163090	359344	248475	311592	365717	385439	172491	259655	252183	45660	41123	53021	53577
GGAGTCCAGCTTGATAGCGT	259	717	13	251	14	715	8	399	16	15	15	400	39195	34973	43835	44841
GGAGTGCTTGGACAACCGGG	180	5	1049	3466	1691	772	2528	1199	1098	10	1888	761	23111	20687	26922	26150
GGATAGGATAAACCACCCGA	239	653	401	10	13	12	13	8	11	11	23	5	34276	30449	38348	39351
GGATGACATGCCTGTCACGT	446	5036	10234	7456	16863	14543	22584	14433	6564	8196	18444	14532	40123	36921	46383	46376
GGCACTCGGAACACACGCGG	217	10	10	14	9	11	13	6	11	11	14	10	26986	24113	30773	30601
GGCAGAGTGATACCAGCTGG	3010	167474	211239	149345	226231	186952	208407	248823	303378	120768	231586	184897	33146	29911	37368	38412
GGCCACTATCCAGAAATCAG	381	42545	5020	41013	6631	3705	5322	5330	3868	3960	2612	4543	33817	29541	38054	39040
GGCCCAGCGGTGGCAACGAG	170	11	21	4	9	7	14	2	1	10	12	6	19926	17669	22723	23513
GGCCGACAGAGTGATCTTGG	273	16	16	12	14	12	13	11	16	9	26	9	37251	33928	42394	42397
GGCTGCATGCTGACGGTAGG	274	7561	1159	3506	942	1636	818	1087	757	17	1280	894	31222	28336	36727	36852
GGGAACAAATAAGACACTCA	361	13	35	8	25	9	20	14	19	21	20	11	51959	47782	59916	60388
GGGAAGAAGATGTTCTGCGG	2618	299687	187666	294366	257047	263986	225160	224011	207704	90722	194665	153319	27358	24734	30505	31771
GGGACTCCCGAGCGGCGCAA	172	3	12	16	14	3	8	5	7	9	11	4	20559	18008	23715	24494
GGGCGTAATACGCTCGCGTC	209	7	16	9	10	15	10	9	8	7	17	9	29672	27054	34390	34051
GGGGCGTTTCGTACCGGCGT	367	6325	5065	9411	5571	6064	8990	10061	13820	7056	8567	11301	34389	31602	41388	40312
GGGGCTCACCAGTAGGACAG	465	3520	17697	6151	15230	10411	13242	21777	20669	9986	16734	14630	32034	28280	34872	35489
GGGTACTGGAAGAGCGAGCA	6743	478878	389383	486449	469464	477950	479105	480430	486250	321038	411820	332168	28333	25886	31634	33454
GGTACGACGCCCGTATGGCG	157	4	11	7	7	7	8	4	6	5	15	7	22339	19838	25908	25564
GGTACGCGAACCGTACGTTA	251	14	755	12	17	7	478	566	502	1204	231	894	34781	31057	39850	40572
GGTCCTAGGGAATGCCGATA	771	10312	40195	11709	44735	43900	58315	46556	46037	11444	44802	44076	32859	29013	38631	37417
GGTCTCCAGCGCCGGCCTCG	188	650	433	1096	834	8	718	320	1055	4	9	6	21649	19094	24909	25008
GGTGTCGGTGCCTGACCATG	201	11	19	8	13	3	11	12	4	23	21	9	32955	30726	39467	38018
GGTGTCGTACGACCGATGTA	299	17613	5944	11478	7391	11345	5588	4378	7107	6275	6464	8451	27550	25752	32223	32067
GGTTGAGTCACGATAACTGT	2279	140570	127327	149955	182725	126581	138432	174410	228510	62460	139724	126885	39206	36424	46203	45891
GGTTTCTACTCACCACCGTG	2320	132590	126696	139860	152645	194507	140766	133167	173925	116956	120576	102150	30477	27696	35223	35127
GTAAAAATCATTGTTGACTT	465	20	32	15	24	11	28	15	14	20	38	12	69753	63383	79555	80071
GTACCCGCATCTGCACAACG	241	12	21	5	10	11	13	8	11	12	15	5	26687	23955	30391	30353
GTAGCTCAACTCAAAAGCCA	333	16	24	9	13	13	19	14	901	16	25	6	42639	39186	49647	49560
GTAGTGCTTATAGGGGAGCA	1453	79537	80722	86579	94784	82326	87742	100103	57971	44970	81374	71727	46262	41758	53262	52996
GTAGTTTACCACGTACCACT	337	874	23	433	17	11	12	20	13	19	20	11	42281	39515	49546	49830
GTATAATAAATGTCACTTTG	620	990	46	27	29	20	625	16	29	22	524	19	82965	75070	94210	94524
GTATTCATTGGAATAGCAGT	2108	397952	106152	375321	122013	173093	127552	99356	102863	53882	101345	90325	47514	44486	56270	56056
GTCATCTGGGATCCACTACG	295	1152	19	1193	405	12	9	9	12	15	18	12	37797	34956	44339	43238
GTCTACCCTAGCAAAGACCC	257	624	12	363	16	361	13	4	9	12	13	5	33472	30964	38853	39183
GTGACATGGAACATCCGGAA	292	12	25	14	15	14	17	9	13	16	22	10	36057	33231	40790	41892
GTGATTAGGCTGACGCCCAG	1382	141677	58948	141984	81412	110172	92426	74649	63036	34772	50357	43040	38659	35336	45277	46117
GTGCTTCTGAGGGAGTGGAT	432	19	40	12	23	13	22	13	16	17	25	20	51520	46783	58490	58681
GTGGAACTTTGACTTCGTCA	396	485	40	19	34	16	22	31	18	17	406	11	53124	47667	60055	60421
GTGGCTACAGGACGACAACT	355	11	26	7	24	19	24	15	11	10	23	9	37635	33691	42816	43029
GTGGGCACGAGGCAGCGCGA	181	11	11	6	11	3	10	5	3	15	7	10	22574	19873	25256	24947
GTGGTCAGGCCGCTTCAAGA	181	10	10	4	7	11	13	10	3	12	10	4	27120	24163	30766	30287
GTGGTGCAAGCTTACATCGG	264	14	768	11	17	626	394	467	665	12	489	5	36176	33861	40981	41712
GTGTAGACTTCACCGATGAG	381	1118	5349	2293	5557	3238	5076	9361	6880	23	2230	1273	35519	31892	39684	39935
GTGTCTGTATGACCCACCCG	824	12906	38835	15280	47679	27554	42800	59026	54577	7869	34709	28077	40624	37024	46895	45744
GTTCAAGATCTCTCCATCAG	293	10	23	14	14	10	8	9	7	11	26	9	40917	37720	46906	46750
GTTCGGGCGGAAGACAGGCC	215	6	19	8	12	8	9	7	9	12	12	6	32887	30352	37862	37285
GTTCGGTATAACGAAAGGTG	298	2752	5302	3197	4974	3029	4332	4168	3987	15	5146	3927	30703	27014	35043	35214
GTTGCCATCTGGCTTCTTAG	646	9143	16721	7702	17436	21119	18857	21062	21087	9623	18789	18125	46344	42616	52660	53608
GTTGCTCAAAGGGCCATCCC	407	6058	7950	9424	7206	4795	9466	11352	8338	3159	7584	6693	37675	34253	42826	42877
GTTTCTGGCTGTTACTGCCA	3508	103533	153462	111343	216716	199667	190794	237021	303132	144390	144595	37753	52083	46431	59028	58678
TACATACATGTCTTTGGACT	642	4498	10274	3236	14290	7546	5712	14699	9365	3933	13752	7232	66134	60274	75462	74259
TACATTATAAGCTGTCACAG	454	16	32	25	31	14	22	20	17	31	28	14	59587	54928	67487	68242
TACCGCTCCAGTCGTTCATG	287	1487	1614	741	2837	12	1010	3072	2342	15	450	6	36190	32392	41130	40641
TAGACGTGAACACTGACCGG	294	10725	4752	15203	1636	6560	4593	3971	664	1693	1965	2291	29165	27772	33283	34013
TAGTCAACGATGAATTGGCG	376	16	27	13	23	9	13	14	12	18	31	12	43001	38967	49149	49246
TAGTCGTGGCTATTGTTGGA	518	2735	7875	2100	9609	2330	6064	2565	5956	4616	5843	6768	52130	47977	59317	59177
TAGTTCAAGTAAGAAAGACG	487	6723	1660	8128	1228	672	1931	1644	2082	3023	531	848	49743	46950	58834	57278
TATCCACTAGGTATCATAAG	385	16	31	693	23	18	20	16	12	19	27	10	43313	39852	50064	49881
TATCTGGAGGAACTGGCAAA	3676	154805	161849	154354	232606	182416	193928	231212	204769	1470869	6610	3335	29915	27048	37052	34763
TATGCGGCTGCAACGAGACA	3442	138337	198084	115375	235861	223429	254531	271998	264097	166956	275786	270677	38483	34778	43541	43394
TATGGAAAAGCCATTTCCCA	410	2027	392	670	786	2079	2346	1735	300	2753	1677	1397	50799	46800	57963	58403
TCACCAAGGATCCACCTCAC	812	84913	22623	91168	29038	40779	33667	27462	16988	13165	33436	27308	43817	38934	49723	49949
TCACCGATCACAAATTCATG	902	30778	19450	40415	29547	27434	35349	38944	38668	15064	16927	19648	63956	58321	72792	72425
TCACTAGCAAGCCATACAGG	540	2811	8573	770	12059	4941	9622	16170	18673	3447	6995	9261	44145	40119	49340	50451
TCAGGATGTTGTTAAAGTCG	295	10	18	17	15	12	14	9	7	20	14	6	39820	36271	45061	46042
TCATCTTGGAGCATTACGCC	440	851	42	16	20	7	28	96	14	19	35	15	53088	49125	62051	60781
TCATTCATCTGTGTGTACCG	336	12	27	19	23	10	21	14	13	21	20	7	42640	38931	50047	48835
TCCATCCGGCACATCCCCCA	192	6	18	5	13	5	7	5	6	7	14	6	22085	20424	25760	25671
TCCCACTCATCATCCAAGGG	256	196	21	11	11	5	11	304	10	14	1078	11	33246	30315	37912	37745
TCGACAGCAGCATGTACCCG	516	433	9104	486	7527	5399	5640	7761	11274	3235	2767	4860	44678	40545	50381	50499
TCGCCATCGTAGACCGACGC	304	9	20	12	13	9	14	15	11	21	16	8	30409	27510	34699	35017
TCGGACAAATGCAAGTGCAA	542	6172	4040	4606	9150	9361	6126	3056	7122	21	2746	1378	56052	51472	64892	64872
TCTGGATGACAATGTAGAGT	382	12	23	15	14	14	29	14	11	14	27	13	46723	42536	53598	52886
TCTGGCTTCAAACCACACAT	1462	46263	75974	49634	95582	95056	104827	104759	87192	29473	74245	55839	56859	51374	65607	65190
TCTTCCGCCCGAACAGACCG	279	11	22	13	12	12	15	13	3	10	17	11	29452	27075	34439	33372
TCTTTCCCCAGAATGTCGAG	292	16	24	8	16	8	27	6	15	1626	18	743	31410	29603	37699	37743
TGAACATCAAGTCAGCAACG	300	156	21	317	393	9	443	14	209	1661	17	513	40913	36935	47577	46732
TGAAGGTCAGTACAAACGCA	256	14	16	604	16	7	9	12	10	8	18	2	37014	32976	43017	42786
TGAATGTCACAGATCCATCA	504	9842	1941	15025	3376	6731	5520	1671	1379	4306	3239	4956	63402	59099	72916	73003
TGACTTAGTCGCAACTACCG	291	5097	6144	6644	6055	3171	5582	7027	1686	2324	987	4436	34433	31545	40751	40234
TGAGAACCCTGGAGCACAGA	242	21685	6627	25537	6604	5839	5250	9131	6288	3142	4572	4119	24047	21228	28662	28751
TGAGACCCAGGCATACTACA	800	84441	45969	86104	62372	84594	61775	41746	40973	43260	45667	35781	34991	30787	39447	39781
TGAGCTATGACGGACAGACG	257	473	772	2621	14	513	12	1842	1005	1283	485	1897	34606	31924	40761	39182
TGAGTACCCGAGTCGACGCT	278	1664	1821	527	3375	3281	2443	7931	371	11	1219	1431	33808	30212	40253	39317
TGATATCTACCTGCTCAACC	431	18	1294	10	19	22	28	261	19	1665	34	552	60365	55486	69708	70703
TGATCATCACTAAGCAAGGA	379	2475	36	1132	362	1062	16	736	15	21	24	16	50155	46525	58000	56205
TGCAAAACCTCTCAGAACAG	391	26801	33	30156	27	16	21	17	44	1796	25	8	46836	41450	53581	52743
TGCAAACCAGTCAGTACCGG	438	6288	6983	8501	8016	6469	6960	7639	16714	4746	11013	7946	43723	39827	51065	50178
TGCAGATGAGTCCACCGGTG	257	7	14	9	18	9	17	13	11	16	8	11	31821	29600	38358	37598
TGCAGTCAACGTGACTTCCA	303	402	5708	1442	4291	4418	1045	3795	3366	2417	4398	3084	36635	34073	42783	42111
TGCCTTAGGATCGACGGAAG	353	12	161	10	19	13	24	434	1371	25	15	9	37777	34466	43553	44395
TGCTCCTGTGCGGAACAGGT	220	642	24	10	12	10	9	11	10	14	10	3	27188	24700	31121	32146
TGCTTCCATTGCTCCCGGTG	398	2354	5334	571	10115	8519	7394	10162	9968	5266	4959	4998	29032	26628	34605	33433
TGGAAGCACGCTGCTAAGCA	298	10	23	13	15	18	15	610	16	10	17	8	40484	37445	46261	47502
TGGAGAGGCTGCCTCGCTGT	287	4	19	12	22	3	10	9	13	12	18	9	36521	31777	40792	40808
TGGAGCACGGAGACCTGTCA	313	431	18	9	18	6	13	11	17	10	16	11	38652	35550	45624	45583
TGGATTCTGCACCAAGCCAC	306	10	31	16	18	17	24	9	14	19	20	13	38094	35124	43054	44339
TGGCCCGGTAGCCATAGCTT	218	656	11	12	11	12	14	14	7	16	17	831	26699	24651	30578	30471
TGTCACATGGATATAACCTA	428	8494	4701	6619	6786	8911	7300	6504	5177	2582	5499	5514	51977	47336	59949	59796
TGTCATCTCTGTAAAAACTG	330	15	27	14	27	12	17	9	12	11	28	9	46751	42898	53780	53705
TGTCCCCACAGATCTTGCAA	3331	465567	186766	421599	203752	172003	197881	201946	162148	78764	203067	195784	37769	34133	42393	42685
TGTCTACAACTGGACTGCAG	372	3434	17646	1413	13322	6626	10767	10597	14667	3553	10621	11412	37484	33482	43107	42947
TGTGATGTTAGATAAACAGA	312	454	29	141	20	12	464	11	459	19	473	7	47313	42571	54568	54016
TGTGCCAAAGACCCACTCAT	406	2020	511	742	2426	1794	820	298	1926	1575	1603	1175	47287	43979	54995	54382
TGTGCTCACCAAGGTACCCG	259	9	17	8	5	6	14	9	9	10	15	13	33921	30355	38577	38964
TGTGTTCAAGAACGGCCGCG	194	6	7	8	8	4	6	3	1	14	12	7	25679	23445	28140	29364
TGTTGTTGTTAAGCGGCAAG	309	16	22	17	20	10	15	19	8	11	20	11	34630	31007	38819	39534
TTAATGACGAGCTCGTGGAG	362	6240	29	14518	25	21	15	17	23	28	33	15	47235	42997	53157	53156
TTAATTCCAACCAAATCCCA	586	1568	1501	25	3108	1913	3277	15	1854	2853	2250	751	73057	67711	83835	84803
TTATACAGATGATATTTCGA	448	24	32	1291	16	11	647	838	21	21	23	15	58452	52740	65859	66311
TTATTCAGAGTGACGGCCTG	466	5660	1274	3633	1752	3253	16	607	22	29	711	2107	51322	46267	60533	59955
TTATTCTTGTCCAGGCAAGG	386	10	27	14	239	11	15	11	3	21	262	10	48979	44241	56614	56882
TTCCGGAAAGCACAGCCAGG	314	13	35	13	17	8	13	12	12	14	19	8	37300	33840	42528	42923
TTCCTACGGCCTGAGCCGAG	229	8	22	9	10	6	19	7	6	16	19	7	30606	27604	35028	35118
TTCTAATGGCTCACACCCAG	225	11	19	8	14	10	11	11	7	8	14	10	27782	25251	32994	31876
TTCTATAGAGCATCTATCAG	1144	508582	1930	514385	4434	14306	5057	1415	1971	18683	4444	1192	48241	44513	55697	55241
TTCTGTTTAGGCATCACCTG	365	21	28	18	15	11	15	14	10	22	19	10	47385	43511	55881	54889
TTCTTGCAGATTCTCAAACA	1041	179439	26578	184658	32027	47004	21316	25871	25061	25563	30164	22784	46608	42713	52793	52165
TTGATTCTGATGTCCCACGG	848	21517	33110	19853	47967	26501	37329	57892	64494	13474	48169	46003	37554	34199	42251	41891
TTGATTCTTTCGTAGTTTGG	546	20033	10590	26628	8055	16186	8321	10529	8293	18737	5324	2048	59805	55186	69046	67063
TTGCAGGAGCTTTGCCCCAG	246	10	26	11	17	6	10	11	5	7	23	10	31518	28185	36360	35922
TTGCTCCTCTACCCACAACG	348	1344	4615	2224	6749	4378	10020	8787	3658	5478	10031	4699	32141	29663	37866	36735
TTGGAACTAATGCCGTACGG	417	18	27	12	19	25	305	15	16	17	21	677	49877	46239	57836	57116
TTGTCTGTGTGGAACAACGG	278	693	20	671	16	414	1048	13	10	16	25	10	31462	28443	36304	35812
TTGTGGGTCTGCCCCCACAA	431	1387	33	18	18	27	24	14	12	20	28	11	43341	38790	49810	50087
TTTCAAAGAGCGTGTTTCGG	549	23631	19974	17684	35916	23034	25597	34494	25962	8208	20150	18526	37320	34381	45851	44445
TTTCTGTATAAAAGCCCACG	544	6915	13481	7516	14313	20077	15435	19729	18969	11941	13486	9970	47101	43315	55171	54925
TTTGTAAGCACCTACATCCA	619	6390	3444	4486	1484	4694	4298	4618	2985	3524	6149	7193	64919	58768	74373	74251
TTTGTCGGGAAGAAATCTCG	290	1487	1816	2027	1729	1226	1305	415	391	319	2175	2760	31932	28304	36865	36284
