# Supplementary material for: CRISPR screens reveal neuropeptide signaling orchestrates T helper cell differentiation
Source: Research Square preprint supplement (doi:10.21203/rs.3.rs-1953978/v1), 2022-08-16
Supplement: Supplementary file 8 [file ce61aca61541fb20047ca9a1.xlsx]

## Sheet: markers_all
p_val	avg_log2FC	pct.1	pct.2	p_val_adj	cluster	gene	annotation
2.24745e-125	0.413911	1	0.999	6.2924e-121	0	mt-Co1	Early active
4.8518e-125	0.982001	0.851	0.569	1.35841e-120	0	Itgb1	Early active
2.02852e-115	0.351442	1	1	5.67944e-111	0	mt-Co2	Early active
2.1371e-102	0.643694	0.946	0.737	5.98346e-98	0	Tcf7	Early active
1.51315e-97	0.314701	1	1	4.23652e-93	0	mt-Atp6	Early active
4.4408e-97	0.38626	1	0.993	1.24333e-92	0	Arhgdib	Early active
9.92332e-93	0.562668	0.976	0.748	2.77833e-88	0	Klf2	Early active
2.69405e-92	0.716849	0.939	0.648	7.54279e-88	0	S100a6	Early active
1.55566e-90	0.500715	0.971	0.827	4.35553e-86	0	Lsp1	Early active
1.48596e-82	0.442305	0.996	0.961	4.16038e-78	0	Ms4a4b	Early active
8.40089e-80	0.319118	1	0.998	2.35208e-75	0	mt-Atp8	Early active
6.28337e-78	0.327018	1	1	1.75922e-73	0	Actb	Early active
1.14945e-77	0.355462	0.998	0.993	3.21823e-73	0	mt-Co3	Early active
3.96981e-77	0.630276	0.805	0.537	1.11147e-72	0	Itga4	Early active
1.29033e-72	0.535954	0.935	0.786	3.61265e-68	0	Atp1b3	Early active
2.13728e-68	0.429901	0.973	0.876	5.98396e-64	0	Gmfg	Early active
3.4011e-68	0.471131	0.977	0.881	9.52241e-64	0	Crip1	Early active
2.91699e-65	0.321255	0.999	0.996	8.16698e-61	0	mt-Nd4l	Early active
5.33935e-65	0.567251	0.773	0.54	1.49491e-60	0	Slamf6	Early active
2.08527e-63	0.393019	0.989	0.958	5.83834e-59	0	Cnn2	Early active
3.15691e-63	0.327973	0.996	0.98	8.83871e-59	0	Myl12b	Early active
7.21659e-63	-0.727386	0.14	0.366	2.0205e-58	0	Ccnd2	Early active
4.98355e-62	0.638217	0.599	0.368	1.39529e-57	0	Cd9	Early active
8.55335e-62	0.635437	0.596	0.332	2.39477e-57	0	Id3	Early active
2.62713e-61	0.56661	0.54	0.289	7.35545e-57	0	Cdc25b	Early active
1.63649e-59	-1.2968	0.087	0.285	4.58185e-55	0	Cxcr6	Early active
2.90369e-58	0.490328	0.756	0.488	8.12975e-54	0	Cxcr3	Early active
4.61468e-57	0.48292	0.892	0.732	1.29202e-52	0	Gm8369	Early active
9.28917e-57	0.29408	0.989	0.918	2.60078e-52	0	S100a10	Early active
2.03207e-56	0.511224	0.729	0.48	5.68939e-52	0	S1pr1	Early active
2.60789e-56	-0.829764	0.012	0.169	7.30156e-52	0	Ccr2	Early active
2.79163e-55	0.561444	0.636	0.38	7.81599e-51	0	S100a4	Early active
3.38662e-52	-0.518403	0.972	0.981	9.48185e-48	0	Ptma	Early active
8.32576e-52	0.396683	0.897	0.73	2.33105e-47	0	Itgb7	Early active
1.16632e-50	0.340092	0.995	0.947	3.26547e-46	0	Arpc1b	Early active
4.38458e-48	-1.02993	0.022	0.167	1.22759e-43	0	Ly6c1	Early active
6.63149e-48	0.515115	0.53	0.309	1.85668e-43	0	Pdlim1	Early active
1.77477e-47	-1.42196	0.019	0.16	4.96901e-43	0	Igfbp4	Early active
3.21491e-47	0.707584	0.582	0.372	9.00112e-43	0	Anxa2	Early active
9.95894e-47	0.298306	0.999	0.997	2.7883e-42	0	Actg1	Early active
1.58117e-46	0.319992	0.97	0.907	4.42697e-42	0	Ldha	Early active
2.14654e-46	0.349369	0.971	0.919	6.00987e-42	0	mt-Nd4	Early active
6.8592e-45	0.467712	0.908	0.755	1.92044e-40	0	Tagln2	Early active
8.56564e-45	0.485629	0.377	0.186	2.39821e-40	0	Adk	Early active
4.01819e-44	0.474768	0.683	0.478	1.12501e-39	0	Acp5	Early active
3.68075e-43	0.396111	0.976	0.809	1.03054e-38	0	S100a11	Early active
1.16355e-42	0.368427	0.924	0.809	3.25772e-38	0	Arpc5	Early active
4.35002e-42	0.440283	0.522	0.305	1.21792e-37	0	Actn1	Early active
1.89537e-41	0.383327	0.902	0.745	5.30665e-37	0	Prr13	Early active
3.34484e-40	0.313358	0.983	0.919	9.3649e-36	0	Ms4a6b	Early active
3.52533e-40	0.363383	0.83	0.678	9.87022e-36	0	Ostf1	Early active
5.01847e-40	-0.267532	1	1	1.40507e-35	0	Rpl39	Early active
6.60479e-40	-0.311543	1	1	1.84921e-35	0	Rps24	Early active
1.46289e-39	0.417189	0.593	0.387	4.0958e-35	0	Ehd3	Early active
1.46655e-39	0.326496	0.89	0.743	4.10606e-35	0	S100a13	Early active
3.52971e-39	0.426558	0.58	0.368	9.88249e-35	0	Rasa3	Early active
1.17228e-38	-0.288329	0.997	0.994	3.28214e-34	0	Rpl10	Early active
1.26171e-38	-0.261718	1	1	3.53254e-34	0	Rps5	Early active
1.28003e-38	0.462614	0.648	0.446	3.58384e-34	0	Flna	Early active
1.29297e-38	0.283619	0.98	0.928	3.62005e-34	0	Cdc42	Early active
6.47789e-38	0.401259	0.625	0.409	1.81368e-33	0	Nsg2	Early active
2.07736e-37	0.411241	0.611	0.403	5.8162e-33	0	Asap1	Early active
3.80208e-37	-0.277292	1	1	1.06451e-32	0	Rps4x	Early active
1.17467e-35	-0.65084	0.069	0.208	3.28883e-31	0	Rgs1	Early active
2.375e-35	0.40879	0.319	0.157	6.64954e-31	0	Tob1	Early active
2.54191e-35	0.387484	0.673	0.471	7.11683e-31	0	Stk38	Early active
2.13785e-34	0.431611	0.772	0.64	5.98554e-30	0	Tpr	Early active
3.29346e-34	0.314854	0.923	0.821	9.22104e-30	0	Fkbp1a	Early active
3.75544e-34	-0.461251	0.031	0.146	1.05145e-29	0	Ramp1	Early active
9.08361e-34	0.381409	0.317	0.159	2.54323e-29	0	Aff3	Early active
3.55091e-33	0.422593	0.525	0.341	9.94183e-29	0	Smap2	Early active
5.88171e-33	0.306658	0.955	0.885	1.64676e-28	0	Ets1	Early active
7.62814e-33	0.398406	0.496	0.304	2.13573e-28	0	Sidt1	Early active
2.12957e-32	0.377371	0.466	0.282	5.96237e-28	0	Ptpra	Early active
4.54934e-32	0.347033	0.432	0.247	1.27373e-27	0	Il18r1	Early active
1.88838e-31	0.389469	0.439	0.268	5.2871e-27	0	Myo1f	Early active
2.22791e-31	0.373795	0.584	0.385	6.23771e-27	0	Fam101b	Early active
1.84499e-30	0.369367	0.712	0.519	5.16561e-26	0	Fam65b	Early active
2.51729e-30	-0.591983	0.074	0.2	7.0479e-26	0	Sell	Early active
3.57936e-30	0.274036	0.974	0.947	1.00215e-25	0	mt-Nd1	Early active
1.52161e-29	0.324978	0.867	0.748	4.2602e-25	0	Rinl	Early active
1.90213e-29	-0.450613	0.926	0.932	5.32559e-25	0	Ltb	Early active
4.04021e-29	0.348914	0.345	0.194	1.13118e-24	0	Gstt2	Early active
4.213e-29	-0.343197	0.944	0.957	1.17956e-24	0	Npm1	Early active
5.30308e-29	-0.880249	0.311	0.446	1.48476e-24	0	Il7r	Early active
6.64753e-29	0.321619	0.744	0.572	1.86118e-24	0	Cnp	Early active
1.36904e-28	-0.699999	0.271	0.402	3.83304e-24	0	Ifngr1	Early active
1.63442e-28	0.393146	0.497	0.337	4.57606e-24	0	Cnot6l	Early active
2.49752e-28	0.368531	0.741	0.613	6.99255e-24	0	Ppdpf	Early active
3.72584e-28	0.401533	0.537	0.375	1.04316e-23	0	Rpa1	Early active
4.32489e-28	0.369942	0.625	0.456	1.21088e-23	0	Xrn2	Early active
6.01517e-28	0.333013	0.732	0.58	1.68413e-23	0	Tnfaip8l2	Early active
6.53748e-28	0.330878	0.811	0.643	1.83036e-23	0	Dgka	Early active
1.14726e-27	0.398688	0.639	0.477	3.21209e-23	0	Dock2	Early active
1.50607e-27	-0.328797	0.988	0.991	4.21669e-23	0	Rpl36a	Early active
1.63453e-27	-0.509926	0.47	0.587	4.57637e-23	0	Ccnd3	Early active
1.87374e-27	0.347309	0.248	0.122	5.24609e-23	0	Agpat5	Early active
2.26824e-27	0.345447	0.476	0.311	6.35063e-23	0	Cyb5r4	Early active
6.29893e-27	-0.267765	1	0.999	1.76357e-22	0	Rps29	Early active
7.63434e-27	0.372611	0.384	0.232	2.13746e-22	0	Arl5c	Early active
1.55977e-26	0.347543	0.715	0.563	4.36706e-22	0	Emb	Early active
2.40914e-26	0.358101	0.724	0.578	6.74512e-22	0	Tspan32	Early active
5.12676e-26	0.302447	0.883	0.768	1.43539e-21	0	mt-Nd5	Early active
5.2864e-26	0.31133	0.911	0.837	1.48009e-21	0	Anp32a	Early active
8.3474e-26	-0.295186	0.992	0.986	2.3371e-21	0	Ly6e	Early active
8.74607e-26	0.303022	0.789	0.629	2.44873e-21	0	Smap1	Early active
1.2639e-25	-1.01774	0.345	0.458	3.53866e-21	0	Izumo1r	Early active
2.02407e-25	0.25152	0.948	0.889	5.66699e-21	0	Hmha1	Early active
2.1373e-25	0.323263	0.66	0.499	5.98401e-21	0	Srpk1	Early active
4.10596e-25	0.334409	0.442	0.287	1.14959e-20	0	Acot7	Early active
4.59761e-25	0.303242	0.859	0.754	1.28724e-20	0	Cotl1	Early active
4.75473e-25	0.281083	0.614	0.435	1.33123e-20	0	S1pr4	Early active
5.15978e-25	0.344393	0.568	0.401	1.44463e-20	0	Spn	Early active
8.23969e-25	0.334305	0.266	0.143	2.30695e-20	0	Dus2	Early active
2.56158e-24	0.299148	0.187	0.082	7.1719e-20	0	F2rl1	Early active
3.87903e-24	0.316146	0.405	0.25	1.08605e-19	0	Rora	Early active
4.65225e-24	-0.957922	0.326	0.425	1.30254e-19	0	Id2	Early active
1.49941e-23	-0.31217	0.849	0.888	4.19805e-19	0	Eef1d	Early active
1.66987e-23	0.26625	0.228	0.112	4.67531e-19	0	Emc9	Early active
3.90723e-23	-0.414037	0.033	0.12	1.09395e-18	0	Bhlhe40	Early active
5.87924e-23	0.327821	0.645	0.488	1.64607e-18	0	BC021614	Early active
9.21743e-23	0.328875	0.509	0.354	2.5807e-18	0	Bcl2	Early active
1.45494e-22	-0.645536	0.157	0.275	4.07355e-18	0	Ikzf2	Early active
2.16192e-22	0.296064	0.713	0.562	6.05294e-18	0	Crlf3	Early active
2.24642e-22	0.284191	0.797	0.667	6.28954e-18	0	Saraf	Early active
9.66815e-22	0.278549	0.838	0.702	2.70689e-17	0	Cd28	Early active
9.77412e-22	0.29606	0.704	0.566	2.73656e-17	0	Cd4	Early active
1.24964e-21	0.300071	0.489	0.331	3.49875e-17	0	Cdkn2d	Early active
2.08926e-21	0.299021	0.748	0.623	5.84951e-17	0	Rer1	Early active
2.31053e-21	0.306663	0.598	0.445	6.46902e-17	0	Stat4	Early active
2.31808e-21	-0.560735	0.26	0.374	6.49017e-17	0	Glrx	Early active
3.50219e-21	0.373213	0.605	0.478	9.80543e-17	0	Glud1	Early active
5.64734e-21	-0.273571	0.999	1	1.58114e-16	0	Rps19	Early active
7.51048e-21	-0.340875	0.633	0.703	2.10278e-16	0	Hnrnpa1	Early active
1.35496e-20	0.253489	0.944	0.885	3.79361e-16	0	Hint1	Early active
1.59432e-20	-0.554737	0.388	0.483	4.46377e-16	0	Il2rb	Early active
2.17101e-20	0.272971	0.246	0.134	6.07839e-16	0	Arhgap26	Early active
2.89796e-20	0.32548	0.723	0.603	8.11372e-16	0	Ablim1	Early active
3.3952e-20	0.253027	0.28	0.161	9.50589e-16	0	P2rx7	Early active
3.51303e-20	0.313338	0.556	0.404	9.83579e-16	0	Ap3s1	Early active
4.55196e-20	0.291016	0.635	0.491	1.27446e-15	0	Sh3kbp1	Early active
5.15692e-20	0.296524	0.452	0.309	1.44383e-15	0	Gars	Early active
1.13976e-19	0.272202	0.527	0.354	3.19109e-15	0	Ccr7	Early active
1.29748e-19	0.256058	0.837	0.732	3.63269e-15	0	Bin2	Early active
1.56571e-19	0.290539	0.739	0.598	4.38367e-15	0	1810058I24Rik	Early active
2.2698e-19	0.263206	0.51	0.355	6.35499e-15	0	Ahnak	Early active
4.71887e-19	0.288881	0.696	0.572	1.32119e-14	0	Rnf167	Early active
7.128e-19	0.292927	0.466	0.321	1.9957e-14	0	Gpr183	Early active
8.58958e-19	0.293854	0.504	0.361	2.40491e-14	0	Grk6	Early active
2.12765e-18	0.284687	0.365	0.243	5.95699e-14	0	Dck	Early active
2.13832e-18	-0.51837	0.031	0.104	5.98686e-14	0	Tnfrsf9	Early active
2.787e-18	0.332684	0.553	0.421	7.80303e-14	0	Klf3	Early active
3.26479e-18	0.308198	0.54	0.394	9.14076e-14	0	Gm26740	Early active
3.30419e-18	0.268387	0.814	0.705	9.25107e-14	0	Ube2d2a	Early active
6.91724e-18	0.327508	0.486	0.355	1.93669e-13	0	Tuba1a	Early active
8.05731e-18	0.263945	0.251	0.147	2.25589e-13	0	Ccdc28b	Early active
1.50333e-17	0.268799	0.316	0.198	4.20902e-13	0	Lipa	Early active
3.23895e-17	0.322792	0.588	0.465	9.06841e-13	0	Tspan13	Early active
3.46518e-17	-0.46865	0.181	0.28	9.70182e-13	0	Socs1	Early active
3.75798e-17	0.273715	0.128	0.056	1.05216e-12	0	Zbtb32	Early active
4.73543e-17	0.28216	0.45	0.318	1.32582e-12	0	Esyt2	Early active
5.8269e-17	0.258111	0.731	0.598	1.63142e-12	0	Arpc5l	Early active
8.35958e-17	0.285863	0.489	0.357	2.34051e-12	0	Ubl3	Early active
1.47537e-16	0.257735	0.457	0.327	4.13074e-12	0	Psen2	Early active
1.57686e-16	0.292822	0.428	0.306	4.41489e-12	0	Rsu1	Early active
3.38711e-16	0.274643	0.435	0.312	9.48324e-12	0	Arhgap1	Early active
5.63887e-16	0.270034	0.248	0.152	1.57877e-11	0	Wdr12	Early active
6.99186e-16	0.25688	0.854	0.767	1.95758e-11	0	Myh9	Early active
1.14644e-15	0.267133	0.492	0.364	3.20981e-11	0	Hsd11b1	Early active
1.30931e-15	-0.346006	0.087	0.171	3.66582e-11	0	Rgcc	Early active
2.13998e-15	0.257757	0.505	0.374	5.99151e-11	0	Add3	Early active
3.1877e-15	0.260215	0.467	0.34	8.92493e-11	0	Prex1	Early active
3.34163e-15	0.253484	0.534	0.41	9.35589e-11	0	Sema4d	Early active
7.15352e-15	0.25655	0.31	0.2	2.00284e-10	0	Thada	Early active
7.96665e-15	0.272438	0.686	0.572	2.2305e-10	0	Zfp36	Early active
2.77841e-14	0.262817	0.66	0.55	7.77898e-10	0	mt-Nd3	Early active
5.45112e-14	-0.317948	0.177	0.272	1.52621e-09	0	Ptms	Early active
5.95673e-14	0.26661	0.549	0.437	1.66777e-09	0	Gtf2i	Early active
1.00985e-13	0.260566	0.522	0.398	2.82737e-09	0	Vsir	Early active
1.85e-13	-0.305799	0.1	0.179	5.17963e-09	0	Ephx1	Early active
2.22956e-13	-0.339233	0.151	0.24	6.24232e-09	0	Dusp1	Early active
2.35004e-13	-0.428269	0.355	0.429	6.57963e-09	0	Arl4c	Early active
6.75883e-13	0.250547	0.423	0.315	1.89234e-08	0	Themis	Early active
7.84554e-13	-0.682437	0.109	0.183	2.19659e-08	0	Lgals3	Early active
9.38182e-13	-0.319816	0.706	0.739	2.62672e-08	0	Tubb5	Early active
2.01766e-12	-0.256291	0.071	0.14	5.64905e-08	0	Slamf7	Early active
2.50202e-12	-0.440677	0.354	0.43	7.00517e-08	0	Tnfrsf18	Early active
3.94119e-12	-0.378501	0.365	0.445	1.10345e-07	0	Tuba1b	Early active
5.87905e-12	-0.454221	0.059	0.123	1.64602e-07	0	Dapl1	Early active
8.98531e-12	0.259462	0.562	0.459	2.51571e-07	0	Stk4	Early active
1.6124e-11	-0.287243	0.115	0.188	4.51439e-07	0	Relb	Early active
2.12633e-11	-0.295066	0.097	0.167	5.95331e-07	0	Bcl3	Early active
2.69359e-11	-0.268963	0.423	0.495	7.54151e-07	0	Anapc11	Early active
2.96943e-11	-0.2875	0.308	0.387	8.31382e-07	0	4930523C07Rik	Early active
6.02609e-11	-0.264832	0.075	0.139	1.68718e-06	0	Bmyc	Early active
8.49065e-11	-0.279377	0.071	0.133	2.37721e-06	0	Asb2	Early active
2.00543e-10	-0.280487	0.103	0.167	5.6148e-06	0	Cd226	Early active
2.38636e-10	-0.468181	0.256	0.331	6.68134e-06	0	Isg15	Early active
8.75937e-10	-0.262001	0.133	0.2	2.45245e-05	0	2010111I01Rik	Early active
8.89414e-10	-0.267128	0.249	0.323	2.49018e-05	0	Impdh2	Early active
1.05611e-09	-0.728842	0.199	0.264	2.9569e-05	0	Tnfrsf4	Early active
1.32641e-09	-0.397037	0.31	0.369	3.71368e-05	0	Tsc22d3	Early active
1.40419e-09	-0.330245	0.057	0.11	3.93144e-05	0	Anxa1	Early active
1.44975e-09	-0.410194	0.543	0.587	4.05901e-05	0	Stat1	Early active
1.76541e-09	-0.405272	0.443	0.503	4.94279e-05	0	Hmgn2	Early active
4.83595e-09	-0.255002	0.144	0.209	0.000135397	0	Gbp4	Early active
1.00618e-08	-0.307503	0.057	0.107	0.000281709	0	Fabp5	Early active
1.48035e-08	-2.21723	0.285	0.331	0.000414468	0	Ccl5	Early active
1.69351e-08	-0.355555	0.373	0.431	0.000474148	0	Smc4	Early active
1.96358e-08	-0.339552	0.186	0.252	0.000549763	0	Ctla4	Early active
2.06131e-08	-0.261606	0.458	0.524	0.000577124	0	Prkch	Early active
2.36335e-08	-0.269634	0.531	0.577	0.000661691	0	Itk	Early active
2.80664e-08	-0.342582	0.324	0.385	0.000785804	0	Dusp2	Early active
1.4672e-07	-0.534358	0.064	0.109	0.00410786	0	Stmn1	Early active
2.61811e-07	-0.253367	0.418	0.458	0.00733019	0	Hmgn1	Early active
2.71996e-07	-0.293255	0.082	0.13	0.00761534	0	Marcksl1	Early active
3.06335e-07	-0.327584	0.263	0.315	0.00857677	0	Maf	Early active
2.12752e-06	-0.363774	0.153	0.206	0.0595664	0	Ctla2a	Early active
7.03752e-06	-0.271268	0.233	0.287	0.197037	0	Igtp	Early active
8.16232e-06	-0.273943	0.521	0.54	0.228529	0	Txnip	Early active
2.07515e-05	-0.401495	0.168	0.21	0.581001	0	Capg	Early active
3.72712e-05	-0.32278	0.248	0.291	1	0	Ctsw	Early active
0.000295679	-0.251966	0.592	0.596	1	0	Zfp36l1	Early active
0.000379186	-0.292698	0.181	0.216	1	0	Gbp2	Early active
0.00271449	-0.46468	0.305	0.318	1	0	Pdcd1	Early active
0.00615426	-0.484283	0.513	0.394	1	0	Nkg7	Early active
3.38515e-221	1.72506	0.756	0.222	9.47775e-217	1	Pdcd1	Tfh
5.02069e-207	-1.86006	0.453	0.907	1.40569e-202	1	Klf2	Tfh
6.10601e-204	1.25512	0.567	0.106	1.70956e-199	1	Tox2	Tfh
2.71025e-181	1.2047	0.625	0.154	7.58817e-177	1	Cxcr5	Tfh
9.91388e-161	0.658775	0.24	0.009	2.77569e-156	1	Il21	Tfh
3.16079e-157	-1.53807	0.401	0.817	8.84959e-153	1	Emp3	Tfh
6.30738e-156	-1.36822	0.603	0.878	1.76594e-151	1	Selplg	Tfh
6.30102e-151	1.46488	0.81	0.336	1.76416e-146	1	Izumo1r	Tfh
2.10852e-133	1.08551	0.75	0.321	5.90344e-129	1	Mrps6	Tfh
1.72765e-132	1.23008	0.758	0.353	4.83708e-128	1	Tigit	Tfh
2.16651e-132	1.23042	0.875	0.533	6.0658e-128	1	Rgs10	Tfh
3.09535e-130	-1.47186	0.596	0.853	8.66636e-126	1	Tagln2	Tfh
6.60628e-126	1.03143	0.671	0.25	1.84963e-121	1	Tox	Tfh
1.23749e-125	-1.55165	0.853	0.928	3.46472e-121	1	Crip1	Tfh
7.72682e-125	1.25107	0.882	0.562	2.16336e-120	1	Icos	Tfh
4.14836e-116	0.657772	0.252	0.027	1.16146e-111	1	Cebpa	Tfh
5.17049e-115	0.78064	0.397	0.082	1.44763e-110	1	Tnfsf11	Tfh
7.95383e-113	0.939238	0.805	0.385	2.22691e-108	1	2310001H17Rik	Tfh
3.41753e-100	1.85059	0.206	0.02	9.56839e-96	1	Sostdc1	Tfh
2.36442e-99	0.940266	0.333	0.068	6.61989e-95	1	Marcksl1	Tfh
9.50226e-99	0.808473	0.535	0.171	2.66044e-94	1	Ikzf2	Tfh
5.35556e-97	1.02564	0.802	0.448	1.49945e-92	1	Hif1a	Tfh
3.61931e-95	0.92296	0.756	0.376	1.01334e-90	1	Dennd2d	Tfh
1.27984e-94	-1.00115	0.625	0.823	3.58329e-90	1	Itgb7	Tfh
3.51655e-94	0.901302	0.799	0.449	9.84565e-90	1	Smco4	Tfh
4.62492e-90	1.00187	0.873	0.631	1.29488e-85	1	Sh2d1a	Tfh
8.14112e-88	0.745024	0.183	0.018	2.27935e-83	1	Padi4	Tfh
4.84674e-86	0.677254	0.227	0.033	1.35699e-81	1	H2-Q2	Tfh
2.93281e-85	0.537946	0.254	0.042	8.21129e-81	1	Ptrh1	Tfh
6.75746e-85	-1.1547	0.139	0.522	1.89195e-80	1	Rasgrp2	Tfh
2.27046e-84	0.417952	0.179	0.017	6.35684e-80	1	Plekho1	Tfh
1.097e-83	0.698104	0.39	0.109	3.07139e-79	1	Endod1	Tfh
2.76335e-82	-1.09682	0.336	0.646	7.73684e-78	1	Anxa6	Tfh
6.23752e-82	0.421278	0.129	0.005	1.74638e-77	1	Ascl2	Tfh
6.88932e-82	-1.75871	0.089	0.462	1.92887e-77	1	Il7r	Tfh
9.03984e-81	-1.20607	0.102	0.465	2.53098e-76	1	Arl4c	Tfh
2.19387e-80	0.48976	0.173	0.017	6.14241e-76	1	Sccpdh	Tfh
3.35522e-80	0.402794	1	1	9.39394e-76	1	Rpsa	Tfh
4.78858e-78	-1.08602	0.235	0.581	1.34071e-73	1	Adgre5	Tfh
1.09174e-77	-0.938851	0.831	0.888	3.05665e-73	1	Lsp1	Tfh
8.49054e-77	0.609027	0.984	0.893	2.37718e-72	1	Gapdh	Tfh
6.63561e-75	0.798416	0.752	0.427	1.85784e-70	1	Tnfaip8	Tfh
2.33357e-74	0.822312	0.425	0.142	6.53352e-70	1	Nfkb1	Tfh
2.59673e-73	-0.833947	0.541	0.787	7.27034e-69	1	Cytip	Tfh
3.68992e-73	0.498682	0.191	0.027	1.0331e-68	1	Angptl2	Tfh
1.56752e-71	0.803931	0.908	0.753	4.38874e-67	1	Gdi2	Tfh
3.77499e-71	0.737022	0.892	0.651	1.05692e-66	1	Ctsb	Tfh
5.82995e-70	0.584743	0.367	0.107	1.63227e-65	1	Ephx1	Tfh
1.43468e-69	0.897775	0.619	0.305	4.01681e-65	1	Tnfsf8	Tfh
1.67214e-69	0.354131	0.141	0.012	4.68167e-65	1	Fam43a	Tfh
9.76433e-66	-1.05322	0.434	0.656	2.73382e-61	1	Dnajc15	Tfh
1.84929e-65	0.790533	0.546	0.245	5.17764e-61	1	Maf	Tfh
7.89355e-65	0.551549	0.386	0.124	2.21004e-60	1	Rnf19a	Tfh
2.87666e-64	0.675279	0.335	0.101	8.05407e-60	1	Stx11	Tfh
1.63501e-63	-0.797043	0.785	0.85	4.57769e-59	1	Atp1b3	Tfh
2.99716e-63	0.707732	0.618	0.302	8.39145e-59	1	Trim8	Tfh
1.331e-62	-1.15526	0.1	0.408	3.72653e-58	1	Ifngr1	Tfh
8.54198e-62	-0.755154	0.647	0.805	2.39158e-57	1	Cd47	Tfh
1.1325e-61	0.693516	0.732	0.428	3.17076e-57	1	Fyn	Tfh
2.4065e-61	0.519475	0.274	0.069	6.73772e-57	1	Gm14718	Tfh
4.13566e-60	0.637115	0.477	0.192	1.1579e-55	1	Tnfrsf4	Tfh
9.99808e-60	0.392955	0.131	0.013	2.79926e-55	1	Rgs16	Tfh
3.23564e-59	0.825059	0.692	0.395	9.05915e-55	1	Nfatc1	Tfh
1.62109e-58	0.477904	0.254	0.062	4.53872e-54	1	Egln3	Tfh
4.04472e-58	0.727627	0.554	0.257	1.13244e-53	1	Ptpn11	Tfh
8.77749e-58	0.549807	0.287	0.081	2.45752e-53	1	Gadd45b	Tfh
2.82748e-57	0.466144	0.988	0.923	7.91638e-53	1	Ptprcap	Tfh
2.96584e-57	-0.858635	0.335	0.617	8.30374e-53	1	S1pr1	Tfh
7.39073e-57	0.365736	0.177	0.03	2.06926e-52	1	Coro2b	Tfh
6.48821e-56	-0.578808	0.959	0.976	1.81657e-51	1	Ms4a4b	Tfh
1.55632e-55	0.807884	0.683	0.373	4.35739e-51	1	Id3	Tfh
1.77699e-55	0.761054	0.425	0.168	4.97521e-51	1	Ppp1r14b	Tfh
6.58502e-55	0.746309	0.327	0.109	1.84367e-50	1	Oxsr1	Tfh
1.16552e-52	0.576194	0.919	0.745	3.26323e-48	1	Rap1a	Tfh
1.35681e-52	0.619743	0.826	0.577	3.7988e-48	1	Zap70	Tfh
2.25676e-51	-0.961791	0.548	0.697	6.31848e-47	1	Epsti1	Tfh
3.97331e-51	-0.825728	0.3	0.54	1.11245e-46	1	S1pr4	Tfh
8.37807e-51	0.491847	0.376	0.139	2.34569e-46	1	Litaf	Tfh
3.80295e-50	-1.68588	0.227	0.479	1.06475e-45	1	Nkg7	Tfh
5.99467e-50	-0.670875	0.769	0.85	1.67839e-45	1	Npc2	Tfh
1.0875e-49	0.519799	0.96	0.886	3.0448e-45	1	Ptprc	Tfh
3.27015e-49	-0.767823	0.34	0.584	9.15576e-45	1	Stk38	Tfh
3.36826e-49	0.655008	0.428	0.182	9.43046e-45	1	Tbc1d4	Tfh
2.38432e-48	-0.983686	0.133	0.393	6.67563e-44	1	Tsc22d3	Tfh
3.03856e-48	-0.877882	0.463	0.667	8.50736e-44	1	Itga4	Tfh
1.62385e-47	0.620602	0.337	0.124	4.54644e-43	1	Matk	Tfh
1.90711e-46	0.544299	0.615	0.331	5.33953e-42	1	Timm17b	Tfh
4.05832e-46	0.717297	0.79	0.554	1.13625e-41	1	Zfp36l1	Tfh
7.55994e-46	0.279652	0.117	0.015	2.11663e-41	1	Bcl6	Tfh
1.39035e-45	0.531316	0.932	0.836	3.89271e-41	1	Pkm	Tfh
1.99979e-45	0.446129	0.976	0.867	5.59902e-41	1	Hmgb1	Tfh
1.15223e-44	0.695802	0.567	0.305	3.22601e-40	1	Rnaset2a	Tfh
5.34916e-44	-0.49855	0.927	0.945	1.49766e-39	1	Ms4a6b	Tfh
1.38143e-43	0.510727	0.964	0.848	3.86774e-39	1	S100a11	Tfh
1.62175e-43	0.347463	0.226	0.064	4.54058e-39	1	Ptpn13	Tfh
2.57705e-43	0.40466	0.254	0.078	7.21521e-39	1	Smox	Tfh
2.6647e-43	-1.0654	0.219	0.456	7.46063e-39	1	Ccr7	Tfh
2.7953e-43	0.580107	0.7	0.431	7.82629e-39	1	Asap1	Tfh
4.91247e-43	-1.1791	0.457	0.644	1.37539e-38	1	Vim	Tfh
1.2982e-42	0.496065	0.324	0.122	3.6347e-38	1	Eea1	Tfh
4.1977e-42	0.406572	0.984	0.939	1.17527e-37	1	Atp5g3	Tfh
6.09291e-42	-0.792928	0.171	0.414	1.70589e-37	1	Sidt1	Tfh
6.37484e-42	0.605989	0.754	0.5	1.78483e-37	1	BC021614	Tfh
1.86472e-41	0.381787	0.218	0.062	5.22084e-37	1	Cela1	Tfh
5.82927e-41	0.593097	0.607	0.346	1.63208e-36	1	Prkca	Tfh
6.07107e-41	0.471086	0.993	0.987	1.69978e-36	1	Hsp90ab1	Tfh
8.29216e-41	-0.776	0.367	0.567	2.32164e-36	1	Txnip	Tfh
1.07457e-40	-0.8164	0.292	0.504	3.00857e-36	1	Klf3	Tfh
1.24524e-40	0.392814	0.236	0.073	3.48643e-36	1	Lpp	Tfh
5.78582e-40	-0.687134	0.405	0.599	1.61991e-35	1	Tpst2	Tfh
7.85696e-40	-0.79618	0.201	0.432	2.19979e-35	1	Klf6	Tfh
7.86194e-40	0.583123	0.714	0.464	2.20119e-35	1	Hspa5	Tfh
1.37331e-39	0.317831	0.157	0.035	3.845e-35	1	Cd160	Tfh
2.34922e-39	0.440946	0.402	0.175	6.57735e-35	1	Tank	Tfh
3.98534e-38	-0.656065	0.418	0.622	1.11581e-33	1	Fam65b	Tfh
5.27565e-38	0.516871	0.924	0.823	1.47708e-33	1	Cdk2ap2	Tfh
7.20261e-38	0.685331	0.651	0.415	2.01659e-33	1	Ubac2	Tfh
2.49993e-37	-0.763817	0.126	0.352	6.9993e-33	1	Il18r1	Tfh
3.36896e-37	-0.705462	0.963	0.939	9.43242e-33	1	S100a10	Tfh
1.12845e-36	0.427534	0.927	0.776	3.15942e-32	1	Mrpl52	Tfh
2.32888e-36	0.56992	0.668	0.435	6.5204e-32	1	Hpcal1	Tfh
3.93254e-36	0.738641	0.975	0.936	1.10103e-31	1	Srgn	Tfh
4.63025e-36	0.52064	0.541	0.295	1.29638e-31	1	Bcl2a1b	Tfh
9.92763e-36	-0.680393	0.153	0.367	2.77954e-31	1	Lfng	Tfh
1.25289e-35	-1.15983	0.214	0.426	3.50784e-31	1	Id2	Tfh
4.82777e-35	-1.61087	0.106	0.313	1.35168e-30	1	Ly6c2	Tfh
5.79403e-35	0.51026	0.359	0.157	1.62221e-30	1	Mmd	Tfh
7.19895e-35	0.264249	1	0.999	2.01556e-30	1	Rpl28	Tfh
1.09187e-34	0.287429	0.135	0.03	3.05701e-30	1	Cd22	Tfh
3.32227e-34	0.413512	0.389	0.179	9.30168e-30	1	Sypl	Tfh
3.83614e-34	0.444423	0.347	0.15	1.07404e-29	1	Timp2	Tfh
3.90834e-34	0.511415	0.854	0.688	1.09426e-29	1	Spcs1	Tfh
4.42075e-34	-0.471199	0.894	0.915	1.23772e-29	1	Cyba	Tfh
5.07241e-34	0.446257	0.467	0.241	1.42017e-29	1	Stx6	Tfh
5.62782e-34	0.539913	0.494	0.265	1.57568e-29	1	Isg15	Tfh
8.3373e-34	0.532639	0.551	0.314	2.33428e-29	1	Odc1	Tfh
1.45958e-33	0.475033	0.442	0.224	4.08654e-29	1	Stk39	Tfh
2.31216e-33	-0.285127	1	1	6.4736e-29	1	Rps5	Tfh
5.85856e-33	0.388466	0.283	0.111	1.64028e-28	1	Cd200	Tfh
6.34076e-33	0.358496	0.239	0.084	1.77529e-28	1	Asb2	Tfh
1.47859e-32	0.389676	0.27	0.104	4.13975e-28	1	Casp4	Tfh
1.68014e-32	0.567327	0.559	0.327	4.70404e-28	1	Ikzf3	Tfh
1.68616e-32	-0.287422	1	0.999	4.72092e-28	1	Rpl29	Tfh
2.15556e-32	0.442581	0.49	0.264	6.03515e-28	1	Lrmp	Tfh
4.59858e-32	-0.666239	0.288	0.476	1.28751e-27	1	Rasa3	Tfh
8.35952e-32	-0.652161	0.066	0.253	2.3405e-27	1	Gna15	Tfh
8.46675e-32	0.373863	0.151	0.04	2.37052e-27	1	Tubb2a	Tfh
1.44888e-31	0.516138	0.707	0.482	4.05657e-27	1	Pgam1	Tfh
2.40253e-31	-0.425615	0.863	0.92	6.72661e-27	1	Gmfg	Tfh
2.59554e-31	-0.609075	0.162	0.364	7.26699e-27	1	Esyt1	Tfh
4.37975e-31	0.434235	0.904	0.761	1.22624e-26	1	Uqcr10	Tfh
7.54325e-31	0.2564	0.177	0.053	2.11196e-26	1	Phactr2	Tfh
9.21022e-31	0.520872	0.665	0.433	2.57868e-26	1	Ddit4	Tfh
9.84735e-31	0.438856	0.529	0.302	2.75706e-26	1	Tmem256	Tfh
1.0138e-30	-0.859856	0.05	0.231	2.83843e-26	1	Plac8	Tfh
1.17382e-30	0.429306	0.928	0.787	3.28645e-26	1	Tcf7	Tfh
1.37013e-30	0.447669	0.988	0.954	3.8361e-26	1	Ifi27l2a	Tfh
1.49647e-30	0.327971	0.26	0.101	4.18981e-26	1	Tspan5	Tfh
1.94716e-30	0.465261	0.485	0.263	5.45167e-26	1	Rnaset2b	Tfh
5.86308e-30	0.679646	0.66	0.445	1.64155e-25	1	Batf	Tfh
8.18694e-30	0.399049	0.554	0.317	2.29218e-25	1	Plgrkt	Tfh
1.66016e-29	0.420749	0.332	0.154	4.64811e-25	1	Ccdc28b	Tfh
4.18724e-29	0.433419	0.717	0.489	1.17234e-24	1	Hsbp1	Tfh
5.15237e-29	0.395058	0.303	0.133	1.44256e-24	1	Relb	Tfh
7.4936e-29	0.407658	0.494	0.274	2.09806e-24	1	St13	Tfh
8.84534e-29	-0.54147	0.778	0.799	2.47652e-24	1	S100a13	Tfh
1.26483e-28	0.457448	0.826	0.63	3.54127e-24	1	Il16	Tfh
1.49349e-28	0.43962	0.442	0.236	4.18147e-24	1	Lax1	Tfh
4.02151e-28	-0.479637	0.833	0.888	1.12594e-23	1	Thy1	Tfh
4.1537e-28	0.411831	0.428	0.226	1.16295e-23	1	Bcl2a1d	Tfh
5.7523e-28	0.485059	0.105	0.023	1.61053e-23	1	Egr2	Tfh
6.15658e-28	0.447016	0.807	0.585	1.72372e-23	1	Slamf6	Tfh
7.05055e-28	0.424142	0.44	0.236	1.97401e-23	1	Nab1	Tfh
8.15176e-28	0.450568	0.629	0.406	2.28233e-23	1	Hmgn1	Tfh
1.63147e-27	0.26727	0.189	0.064	4.56778e-23	1	Scd2	Tfh
2.11641e-27	0.38549	0.287	0.125	5.92553e-23	1	Pacsin1	Tfh
2.17359e-27	-3.19996	0.17	0.345	6.08561e-23	1	Ccl5	Tfh
2.86154e-27	-0.453036	0.807	0.864	8.01174e-23	1	Rap1b	Tfh
2.99101e-27	-0.649034	0.274	0.449	8.37422e-23	1	Satb1	Tfh
6.52516e-27	-0.593721	0.296	0.459	1.82692e-22	1	Rnf166	Tfh
7.13364e-27	-0.680736	0.052	0.215	1.99728e-22	1	Cd7	Tfh
1.42043e-26	0.267945	0.182	0.062	3.97691e-22	1	Slc26a11	Tfh
1.63648e-26	0.369533	0.967	0.876	4.58183e-22	1	Ndfip1	Tfh
1.75114e-26	0.48366	0.489	0.287	4.90284e-22	1	Tpi1	Tfh
1.78739e-26	0.311108	0.232	0.092	5.00433e-22	1	Decr1	Tfh
2.30064e-26	0.445914	0.797	0.596	6.44133e-22	1	Cd82	Tfh
3.26397e-26	0.335914	0.923	0.803	9.13847e-22	1	Fis1	Tfh
4.07613e-26	-0.647456	0.179	0.352	1.14123e-21	1	Glipr2	Tfh
4.86674e-26	0.306049	0.988	0.973	1.36259e-21	1	Ucp2	Tfh
5.6429e-26	-0.705628	0.031	0.181	1.5799e-21	1	Sell	Tfh
5.75191e-26	0.449442	0.4	0.213	1.61042e-21	1	Socs1	Tfh
7.26425e-26	0.352372	0.385	0.196	2.03384e-21	1	Ctla4	Tfh
1.39514e-25	0.4245	0.792	0.615	3.90612e-21	1	2022-09-07	Tfh
3.23489e-25	-0.539588	0.559	0.671	9.05705e-21	1	Rabac1	Tfh
3.42596e-25	0.276107	0.146	0.045	9.59199e-21	1	Myb	Tfh
3.49991e-25	0.304976	0.177	0.062	9.79906e-21	1	Mt3	Tfh
5.01918e-25	-0.500501	0.554	0.65	1.40527e-20	1	Cnp	Tfh
6.3802e-25	-0.49864	0.696	0.74	1.78633e-20	1	Ostf1	Tfh
8.26711e-25	0.420729	0.628	0.416	2.31462e-20	1	Dap	Tfh
9.48947e-25	0.401926	0.687	0.448	2.65686e-20	1	Inpp4b	Tfh
9.54959e-25	0.384634	0.396	0.206	2.67369e-20	1	Ptms	Tfh
1.03465e-24	-0.317161	0.976	0.979	2.89682e-20	1	Fxyd5	Tfh
1.05098e-24	0.298217	0.211	0.082	2.94253e-20	1	Nt5e	Tfh
1.05445e-24	0.265278	0.157	0.051	2.95224e-20	1	S1pr2	Tfh
1.239e-24	-0.449362	0.624	0.71	3.46895e-20	1	Apbb1ip	Tfh
1.48904e-24	0.386229	0.486	0.279	4.169e-20	1	Rab37	Tfh
1.94056e-24	0.408852	0.264	0.116	5.43319e-20	1	Rgcc	Tfh
2.25368e-24	-0.314091	1	0.999	6.30987e-20	1	Rps19	Tfh
3.27662e-24	0.421738	0.615	0.397	9.17389e-20	1	Rab11a	Tfh
4.28709e-24	0.347913	0.446	0.246	1.2003e-19	1	Tor2a	Tfh
4.30138e-24	0.301305	0.384	0.197	1.2043e-19	1	Isg20	Tfh
4.73767e-24	0.374421	0.622	0.407	1.32645e-19	1	Pgk1	Tfh
4.81724e-24	0.331495	0.373	0.189	1.34873e-19	1	Rgs3	Tfh
5.57055e-24	0.297175	0.274	0.123	1.55964e-19	1	Psat1	Tfh
9.33646e-24	-0.788545	0.058	0.213	2.61402e-19	1	Ctla2a	Tfh
1.14556e-23	0.414789	0.673	0.447	3.20734e-19	1	Nsg2	Tfh
1.28349e-23	0.345404	0.944	0.886	3.59352e-19	1	Ybx1	Tfh
1.33006e-23	0.381024	0.315	0.155	3.72391e-19	1	Slc29a1	Tfh
1.71636e-23	0.250764	0.993	0.977	4.80548e-19	1	Cox8a	Tfh
2.06898e-23	0.250987	0.182	0.067	5.79272e-19	1	Pptc7	Tfh
2.31501e-23	0.309486	0.166	0.058	6.48155e-19	1	Lag3	Tfh
2.89618e-23	0.289893	0.332	0.164	8.10872e-19	1	Bcl7c	Tfh
4.3427e-23	0.410258	0.699	0.484	1.21587e-18	1	Sh2d2a	Tfh
8.90503e-23	0.356357	0.846	0.657	2.49323e-18	1	Cd27	Tfh
1.01435e-22	0.345883	0.831	0.642	2.83997e-18	1	Mrps21	Tfh
1.10227e-22	-0.539102	0.458	0.564	3.08613e-18	1	Stk24	Tfh
1.48626e-22	0.413705	0.721	0.51	4.16122e-18	1	Cox14	Tfh
1.8174e-22	-0.577464	0.267	0.413	5.08836e-18	1	Pdlim1	Tfh
1.94509e-22	0.453687	0.53	0.337	5.44586e-18	1	Gna13	Tfh
2.36829e-22	0.369561	0.485	0.287	6.63075e-18	1	Map4k1	Tfh
4.14058e-22	0.467898	0.214	0.092	1.15928e-17	1	Tnf	Tfh
5.19014e-22	0.279872	0.963	0.904	1.45314e-17	1	Cox6b1	Tfh
7.59794e-22	0.257217	0.977	0.929	2.12727e-17	1	Cox6c	Tfh
9.94164e-22	0.289944	0.938	0.848	2.78346e-17	1	Dad1	Tfh
1.13037e-21	0.290096	0.259	0.118	3.1648e-17	1	Grn	Tfh
1.18359e-21	-0.578766	0.552	0.627	3.3138e-17	1	Lef1	Tfh
1.46096e-21	0.347013	0.93	0.853	4.09041e-17	1	Aldoa	Tfh
1.73698e-21	-0.567809	0.151	0.298	4.86319e-17	1	Gramd3	Tfh
1.84431e-21	0.257515	0.992	0.962	5.1637e-17	1	Lck	Tfh
2.43026e-21	-0.669594	0.145	0.303	6.80425e-17	1	Ctsw	Tfh
3.86127e-21	-0.903119	0.016	0.136	1.08108e-16	1	Ly6c1	Tfh
5.20208e-21	0.353619	0.788	0.59	1.45648e-16	1	Lrp10	Tfh
7.46992e-21	-0.538288	0.153	0.3	2.09143e-16	1	Txk	Tfh
7.90662e-21	0.257603	0.189	0.076	2.21369e-16	1	Eif4enif1	Tfh
8.14408e-21	-0.68137	0.016	0.133	2.28018e-16	1	Ccr2	Tfh
9.66943e-21	0.31992	0.562	0.354	2.70725e-16	1	Cst7	Tfh
1.06742e-20	-0.397733	0.024	0.147	2.98857e-16	1	Smad7	Tfh
1.08667e-20	0.312433	0.372	0.201	3.04247e-16	1	Abcb9	Tfh
1.46289e-20	0.318191	0.36	0.192	4.0958e-16	1	Rasa1	Tfh
2.15196e-20	0.3143	0.327	0.171	6.02507e-16	1	Tnfrsf13b	Tfh
2.35134e-20	0.395852	0.873	0.767	6.58327e-16	1	Atp5g1	Tfh
2.49056e-20	0.320843	0.879	0.724	6.97307e-16	1	Pomp	Tfh
2.51655e-20	0.329304	0.603	0.39	7.04584e-16	1	Itgal	Tfh
2.54656e-20	0.344202	0.603	0.395	7.12986e-16	1	Snx2	Tfh
2.58587e-20	0.381962	0.507	0.319	7.23992e-16	1	Gng2	Tfh
2.86944e-20	0.566701	0.558	0.372	8.03385e-16	1	Rilpl2	Tfh
3.19014e-20	-0.53446	0.013	0.126	8.93174e-16	1	Klrd1	Tfh
3.92004e-20	-0.440897	0.041	0.17	1.09753e-15	1	Rara	Tfh
9.54191e-20	-0.39723	0.652	0.725	2.67154e-15	1	Saraf	Tfh
1.46953e-19	-0.51002	0.827	0.838	4.1144e-15	1	H2afz	Tfh
7.70306e-19	0.255835	0.959	0.886	2.1567e-14	1	Ubl5	Tfh
7.97722e-19	-0.438373	0.633	0.695	2.23346e-14	1	Fam107b	Tfh
8.50296e-19	-0.471647	0.101	0.238	2.38066e-14	1	Tob1	Tfh
1.00738e-18	0.33052	0.598	0.403	2.82047e-14	1	Ndufs6	Tfh
1.12038e-18	0.306028	0.912	0.79	3.13683e-14	1	Slc25a5	Tfh
1.13307e-18	0.398796	0.491	0.316	3.17236e-14	1	Fam162a	Tfh
1.1825e-18	0.335773	0.582	0.381	3.31076e-14	1	Tesc	Tfh
1.24906e-18	-0.471745	0.145	0.283	3.49712e-14	1	Runx3	Tfh
1.27825e-18	0.31576	0.42	0.244	3.57883e-14	1	Spata13	Tfh
1.28092e-18	0.509892	0.895	0.81	3.58632e-14	1	Mif	Tfh
1.28448e-18	-0.497787	0.416	0.539	3.59628e-14	1	Flna	Tfh
1.81214e-18	0.27596	0.934	0.856	5.07363e-14	1	Prdx1	Tfh
2.13688e-18	0.325447	0.539	0.347	5.98284e-14	1	Lpxn	Tfh
2.24269e-18	0.258854	0.934	0.856	6.27909e-14	1	Gabarap	Tfh
2.86967e-18	-0.492765	0.222	0.356	8.03451e-14	1	Tmem71	Tfh
2.87679e-18	0.327614	0.416	0.245	8.05444e-14	1	Raf1	Tfh
4.11634e-18	0.333722	0.679	0.487	1.15249e-13	1	Ptp4a2	Tfh
4.36292e-18	-1.195	0.021	0.128	1.22153e-13	1	Igfbp4	Tfh
4.38405e-18	0.368004	0.72	0.526	1.22745e-13	1	Ddx24	Tfh
4.55968e-18	0.286195	0.465	0.277	1.27662e-13	1	Desi2	Tfh
4.68499e-18	0.304192	0.854	0.676	1.3117e-13	1	Smdt1	Tfh
4.72799e-18	0.279722	0.92	0.801	1.32374e-13	1	Ppp1cc	Tfh
5.56544e-18	0.312598	0.325	0.179	1.55821e-13	1	P2rx7	Tfh
1.28012e-17	0.344281	0.637	0.451	3.58409e-13	1	Lbh	Tfh
1.81916e-17	0.347594	0.718	0.547	5.09328e-13	1	Dbi	Tfh
1.96683e-17	0.268159	0.339	0.186	5.50673e-13	1	Pip4k2a	Tfh
2.19324e-17	0.274144	0.408	0.235	6.14063e-13	1	Arf3	Tfh
3.3042e-17	-0.538282	0.24	0.377	9.25109e-13	1	Dtx1	Tfh
4.39423e-17	-0.449775	0.153	0.289	1.2303e-12	1	Cd96	Tfh
4.69986e-17	-0.416046	0.096	0.222	1.31587e-12	1	Cmah	Tfh
4.83056e-17	0.297878	0.584	0.388	1.35246e-12	1	Max	Tfh
5.36392e-17	-0.394734	0.031	0.137	1.50179e-12	1	Trat1	Tfh
5.69292e-17	0.271146	0.825	0.669	1.5939e-12	1	Ndufb9	Tfh
5.69788e-17	-0.5188	0.377	0.477	1.59529e-12	1	Spn	Tfh
5.91818e-17	0.279133	0.36	0.204	1.65697e-12	1	Tspan3	Tfh
6.4806e-17	0.260747	0.432	0.256	1.81444e-12	1	Farsb	Tfh
6.98018e-17	0.261653	0.256	0.13	1.95431e-12	1	Jarid2	Tfh
7.21804e-17	-0.396651	0.077	0.198	2.02091e-12	1	A430078G23Rik	Tfh
8.44725e-17	0.357942	0.584	0.41	2.36506e-12	1	Nek7	Tfh
9.42414e-17	0.266317	0.442	0.261	2.63857e-12	1	Ube2f	Tfh
1.09619e-16	0.267649	0.287	0.153	3.06912e-12	1	Mbd3	Tfh
1.10444e-16	-0.606182	0.428	0.509	3.09221e-12	1	Zyx	Tfh
1.19601e-16	0.313423	0.365	0.213	3.3486e-12	1	Mxd4	Tfh
1.3485e-16	-0.442804	0.263	0.389	3.77552e-12	1	Fam105a	Tfh
1.39901e-16	-0.36881	0.571	0.647	3.91695e-12	1	Tnfaip8l2	Tfh
1.44174e-16	0.395524	0.866	0.733	4.03658e-12	1	Ran	Tfh
1.67645e-16	0.289109	0.489	0.306	4.69373e-12	1	Maz	Tfh
1.87656e-16	0.278101	0.829	0.672	5.25398e-12	1	Calm3	Tfh
2.02294e-16	-0.300755	0.898	0.913	5.66382e-12	1	Hmha1	Tfh
2.59072e-16	-0.431449	0.319	0.442	7.25349e-12	1	Add3	Tfh
2.77053e-16	-0.389791	0.554	0.63	7.75692e-12	1	Emb	Tfh
3.01754e-16	-0.399648	0.47	0.576	8.44851e-12	1	Ier2	Tfh
3.02125e-16	0.282877	0.327	0.184	8.45889e-12	1	Ttc39c	Tfh
3.84859e-16	-0.608433	0.309	0.431	1.07753e-11	1	Ahnak	Tfh
3.9198e-16	0.331752	0.643	0.456	1.09747e-11	1	Abhd8	Tfh
4.12958e-16	0.307556	0.523	0.343	1.1562e-11	1	Borcs8	Tfh
4.61494e-16	-0.278214	0.882	0.919	1.29209e-11	1	Btg1	Tfh
4.74247e-16	0.403675	0.214	0.105	1.3278e-11	1	Egr1	Tfh
4.8287e-16	0.292159	0.45	0.281	1.35194e-11	1	Pfkp	Tfh
4.94884e-16	-0.45789	0.295	0.418	1.38558e-11	1	Klf13	Tfh
5.44155e-16	-0.414375	0.053	0.163	1.52353e-11	1	Cd226	Tfh
5.52627e-16	0.264757	0.232	0.117	1.54724e-11	1	Jak2	Tfh
9.69583e-16	0.28176	0.398	0.239	2.71464e-11	1	Smarcb1	Tfh
9.83518e-16	-0.427303	0.544	0.607	2.75365e-11	1	Cd48	Tfh
1.11789e-15	0.330363	0.679	0.506	3.12988e-11	1	Gimap5	Tfh
1.21884e-15	-0.436931	0.315	0.432	3.41252e-11	1	Tecpr1	Tfh
1.28582e-15	-0.379572	0.633	0.717	3.60003e-11	1	Dgka	Tfh
1.4275e-15	0.305655	0.3	0.168	3.99672e-11	1	Malt1	Tfh
1.51186e-15	0.263774	0.385	0.229	4.23291e-11	1	Ptk2b	Tfh
1.58707e-15	0.289081	0.554	0.37	4.44349e-11	1	Slc25a39	Tfh
1.737e-15	-0.396521	0.068	0.18	4.86325e-11	1	Sgk1	Tfh
1.85892e-15	0.301321	0.803	0.625	5.20461e-11	1	Pebp1	Tfh
2.05831e-15	-0.30009	0.862	0.877	5.76285e-11	1	Eef1d	Tfh
2.44751e-15	0.280714	0.393	0.234	6.85255e-11	1	Slc9a9	Tfh
2.6803e-15	-0.41819	0.473	0.567	7.5043e-11	1	Acp5	Tfh
2.84551e-15	0.290309	0.564	0.383	7.96686e-11	1	Eif1ax	Tfh
2.87922e-15	-0.392321	0.053	0.159	8.06124e-11	1	Il18rap	Tfh
3.20768e-15	-0.439011	0.563	0.627	8.98088e-11	1	Crlf3	Tfh
3.23597e-15	0.251211	0.96	0.907	9.06007e-11	1	Ndufa4	Tfh
3.63238e-15	0.302336	0.602	0.414	1.01699e-10	1	Snrpd1	Tfh
4.08569e-15	-0.378972	0.587	0.647	1.14391e-10	1	Rab8a	Tfh
4.17974e-15	-0.482969	0.205	0.326	1.17024e-10	1	Rora	Tfh
5.35958e-15	-0.495497	0.296	0.411	1.50057e-10	1	Pim1	Tfh
5.36282e-15	-0.332796	0.041	0.145	1.50148e-10	1	Scml4	Tfh
5.57114e-15	-0.466388	0.264	0.378	1.55981e-10	1	4930523C07Rik	Tfh
5.96741e-15	0.299048	0.668	0.486	1.67076e-10	1	Minos1	Tfh
6.2956e-15	0.303518	0.649	0.479	1.76264e-10	1	Psma4	Tfh
6.7274e-15	0.280623	0.793	0.645	1.88354e-10	1	Gltp	Tfh
7.32994e-15	0.266958	0.827	0.687	2.05224e-10	1	Anp32b	Tfh
7.33258e-15	0.289303	0.556	0.374	2.05298e-10	1	Cstb	Tfh
7.51007e-15	0.253961	0.348	0.205	2.10267e-10	1	Map2k3	Tfh
8.3311e-15	0.268157	0.404	0.244	2.33254e-10	1	Txndc15	Tfh
9.67478e-15	-0.458815	0.471	0.547	2.70874e-10	1	Dock2	Tfh
9.67691e-15	-0.394255	0.137	0.257	2.70934e-10	1	Fam69a	Tfh
1.02671e-14	-0.453768	0.469	0.531	2.87458e-10	1	Rnf138	Tfh
1.05187e-14	0.462681	0.175	0.084	2.94504e-10	1	Nfkbid	Tfh
1.11051e-14	0.288315	0.664	0.484	3.1092e-10	1	Ap2m1	Tfh
1.37429e-14	0.274572	0.546	0.365	3.84774e-10	1	Mrpl36	Tfh
1.65519e-14	-0.411514	0.275	0.404	4.6342e-10	1	Actn1	Tfh
2.46435e-14	0.30006	0.713	0.542	6.89969e-10	1	Stat1	Tfh
3.05223e-14	0.271199	0.416	0.26	8.54564e-10	1	Dck	Tfh
3.17527e-14	-0.404322	0.274	0.392	8.89011e-10	1	Stk10	Tfh
3.44105e-14	0.286944	0.665	0.467	9.63425e-10	1	Prkch	Tfh
3.90523e-14	-0.43106	0.341	0.445	1.09339e-09	1	Nfatc3	Tfh
4.42248e-14	0.279829	0.906	0.819	1.23821e-09	1	Rps17	Tfh
4.48985e-14	0.298979	0.687	0.512	1.25707e-09	1	Ube2n	Tfh
4.95671e-14	0.264912	0.503	0.332	1.38778e-09	1	Crlf2	Tfh
5.45616e-14	-0.592733	0.025	0.115	1.52762e-09	1	Dapl1	Tfh
6.28875e-14	0.284445	0.543	0.367	1.76072e-09	1	Commd3	Tfh
6.58474e-14	0.280525	0.535	0.372	1.8436e-09	1	Ptpn22	Tfh
7.18826e-14	0.269704	0.718	0.547	2.01257e-09	1	Csnk1a1	Tfh
7.84816e-14	0.262051	0.89	0.771	2.19733e-09	1	Cotl1	Tfh
7.91397e-14	-0.407823	0.452	0.529	2.21575e-09	1	Xrn2	Tfh
8.6644e-14	-0.390718	0.576	0.641	2.42586e-09	1	Samhd1	Tfh
9.48611e-14	0.255531	0.402	0.253	2.65592e-09	1	Sesn3	Tfh
9.81659e-14	0.250083	0.737	0.559	2.74845e-09	1	Ostc	Tfh
1.05659e-13	-0.432613	0.228	0.337	2.95824e-09	1	Add1	Tfh
1.18903e-13	0.291736	0.975	0.942	3.32904e-09	1	AW112010	Tfh
1.33361e-13	0.279117	0.703	0.542	3.73383e-09	1	Romo1	Tfh
1.35699e-13	-0.335199	0.052	0.151	3.7993e-09	1	Dusp5	Tfh
1.52998e-13	0.266831	0.668	0.487	4.28363e-09	1	Ghitm	Tfh
1.61139e-13	-0.945246	0.126	0.233	4.51158e-09	1	Cxcr6	Tfh
1.66368e-13	0.313048	0.7	0.525	4.65798e-09	1	Ptpn1	Tfh
1.66413e-13	0.256405	0.827	0.677	4.65923e-09	1	Prkar1a	Tfh
2.1075e-13	0.269602	0.392	0.248	5.90057e-09	1	Hacd3	Tfh
2.17368e-13	-0.410269	0.413	0.502	6.08587e-09	1	Tgfbr2	Tfh
2.93822e-13	0.267397	0.442	0.29	8.22643e-09	1	Bzw2	Tfh
3.11849e-13	0.283028	0.729	0.571	8.73115e-09	1	Vcp	Tfh
3.46624e-13	0.281364	0.26	0.145	9.70477e-09	1	Nfkbiz	Tfh
4.06669e-13	-0.286966	0.027	0.111	1.13859e-08	1	Pik3r5	Tfh
4.5999e-13	-0.483526	0.328	0.426	1.28788e-08	1	Bcl2	Tfh
6.05253e-13	-0.293213	0.802	0.818	1.69459e-08	1	Eno1	Tfh
6.42992e-13	0.288759	0.401	0.256	1.80025e-08	1	Ddx21	Tfh
8.09968e-13	-0.365794	0.171	0.284	2.26775e-08	1	Tmem154	Tfh
8.62776e-13	-0.342629	0.41	0.509	2.4156e-08	1	Ifi203	Tfh
9.08075e-13	-0.357953	0.21	0.322	2.54243e-08	1	Ctdsp1	Tfh
9.61217e-13	-0.263655	0.878	0.904	2.69121e-08	1	Ppp1r18	Tfh
9.66489e-13	-0.414589	0.329	0.422	2.70598e-08	1	Smap2	Tfh
1.04734e-12	-0.259131	0.965	0.952	2.93235e-08	1	Calm1	Tfh
1.05931e-12	-0.316321	0.054	0.149	2.96585e-08	1	Iqgap2	Tfh
1.26199e-12	-0.446063	0.17	0.275	3.53332e-08	1	Hopx	Tfh
1.27251e-12	0.25852	0.564	0.399	3.56277e-08	1	Trp53	Tfh
1.99279e-12	-0.286086	0.028	0.11	5.57943e-08	1	Emp1	Tfh
2.04808e-12	-0.776915	0.077	0.173	5.73422e-08	1	Lgals3	Tfh
2.58355e-12	-0.38254	0.024	0.102	7.23342e-08	1	Klrc1	Tfh
2.76698e-12	0.260238	0.903	0.789	7.747e-08	1	mt-Nd5	Tfh
2.96548e-12	0.272748	0.88	0.772	8.30276e-08	1	Nop10	Tfh
3.34974e-12	0.258809	0.995	0.995	9.37859e-08	1	Cd52	Tfh
3.43122e-12	-0.388824	0.155	0.258	9.60674e-08	1	Trib2	Tfh
3.67368e-12	-0.384334	0.255	0.356	1.02856e-07	1	Kcnab2	Tfh
4.27406e-12	-0.303175	0.035	0.116	1.19665e-07	1	Tdrp	Tfh
4.58953e-12	0.25864	0.661	0.482	1.28498e-07	1	Mrpl54	Tfh
5.41486e-12	-0.326462	0.069	0.162	1.51605e-07	1	Ppp3ca	Tfh
6.60197e-12	0.278082	0.627	0.47	1.84842e-07	1	Txndc17	Tfh
6.91856e-12	-0.327015	0.781	0.78	1.93706e-07	1	Krtcap2	Tfh
7.01847e-12	-0.352534	0.159	0.263	1.96503e-07	1	Il17ra	Tfh
7.05338e-12	-0.340818	0.507	0.567	1.97481e-07	1	Srpk1	Tfh
9.93521e-12	-0.419177	0.266	0.365	2.78166e-07	1	Atp2b1	Tfh
1.19868e-11	-0.31092	0.061	0.15	3.35606e-07	1	Slc17a9	Tfh
1.34588e-11	-0.404556	0.248	0.344	3.7682e-07	1	Klhl6	Tfh
1.66456e-11	0.253253	0.607	0.436	4.66044e-07	1	Camk2d	Tfh
1.71948e-11	-0.343214	0.084	0.179	4.81421e-07	1	Socs3	Tfh
1.76063e-11	0.250152	0.653	0.481	4.92942e-07	1	Itm2c	Tfh
2.00844e-11	0.291094	0.681	0.535	5.62323e-07	1	Scamp3	Tfh
2.08557e-11	-0.41342	0.51	0.553	5.83918e-07	1	Ccnd3	Tfh
2.82372e-11	-0.313791	0.096	0.192	7.90585e-07	1	Sgms1	Tfh
2.83063e-11	-0.424639	0.335	0.415	7.9252e-07	1	Tuba1a	Tfh
2.94559e-11	0.259174	0.648	0.493	8.24706e-07	1	Ndufc1	Tfh
2.98135e-11	0.25459	0.695	0.53	8.34719e-07	1	Ndufv2	Tfh
3.58313e-11	-0.339607	0.3	0.397	1.0032e-06	1	Fli1	Tfh
3.81697e-11	0.295143	0.673	0.527	1.06867e-06	1	Hsp90aa1	Tfh
4.8615e-11	0.26751	0.71	0.579	1.36112e-06	1	Psma6	Tfh
4.9196e-11	0.258677	0.58	0.427	1.37739e-06	1	Metap2	Tfh
6.93251e-11	0.305839	0.676	0.536	1.94096e-06	1	Cd40lg	Tfh
7.40522e-11	-0.297627	0.712	0.728	2.07331e-06	1	Cdc42se1	Tfh
1.15764e-10	-0.311853	0.656	0.684	3.24116e-06	1	Mrpl33	Tfh
1.58471e-10	-0.308595	0.066	0.148	4.43688e-06	1	Galnt10	Tfh
1.72373e-10	-0.296889	0.058	0.14	4.82609e-06	1	Cpm	Tfh
2.03159e-10	0.294508	0.122	0.058	5.68806e-06	1	Irf8	Tfh
2.62819e-10	-0.302031	0.097	0.186	7.3584e-06	1	Pag1	Tfh
2.94306e-10	-0.326829	0.064	0.145	8.23997e-06	1	Sesn1	Tfh
3.53554e-10	-0.289288	0.77	0.762	9.89879e-06	1	Arl6ip5	Tfh
3.82375e-10	-0.397976	0.033	0.104	1.07057e-05	1	Anxa1	Tfh
4.33235e-10	-0.333687	0.195	0.29	1.21297e-05	1	Pydc3	Tfh
4.50915e-10	-0.509433	0.752	0.742	1.26247e-05	1	Hmgb2	Tfh
5.12236e-10	-0.362979	0.202	0.291	1.43416e-05	1	Tnfrsf25	Tfh
5.19122e-10	-0.312027	0.127	0.216	1.45344e-05	1	B4galt1	Tfh
7.24387e-10	-0.297604	0.073	0.153	2.02814e-05	1	Aim1	Tfh
7.27021e-10	-0.354119	0.321	0.401	2.03551e-05	1	Cdkn2d	Tfh
7.45121e-10	0.251988	0.242	0.147	2.08619e-05	1	Arid5b	Tfh
8.14454e-10	-0.298175	0.876	0.871	2.28031e-05	1	Sub1	Tfh
8.99729e-10	-0.378165	0.287	0.38	2.51906e-05	1	Pde4b	Tfh
9.6304e-10	-0.334585	0.384	0.45	2.69632e-05	1	Pttg1	Tfh
1.24054e-09	-0.358334	0.28	0.371	3.47327e-05	1	Ass1	Tfh
1.44688e-09	-0.311908	0.481	0.532	4.05098e-05	1	Rbms1	Tfh
1.45204e-09	-0.335591	0.177	0.267	4.06541e-05	1	Mina	Tfh
1.88261e-09	-0.358288	0.189	0.274	5.27092e-05	1	Capn2	Tfh
2.43635e-09	-0.328362	0.173	0.261	6.8213e-05	1	Gpcpd1	Tfh
3.76828e-09	-0.360136	0.707	0.694	0.000105504	1	Pycard	Tfh
4.01218e-09	-0.354402	0.357	0.419	0.000112333	1	Foxo1	Tfh
4.68993e-09	-0.284785	0.048	0.118	0.000131309	1	Apobec2	Tfh
4.71297e-09	-0.251962	0.604	0.657	0.000131954	1	Snrpd3	Tfh
5.64061e-09	-0.251118	0.676	0.714	0.000157926	1	Zfp36l2	Tfh
5.84639e-09	-0.340631	0.26	0.338	0.000163687	1	Myo1g	Tfh
7.52374e-09	0.341366	0.453	0.327	0.00021065	1	Orai1	Tfh
7.56091e-09	-0.302732	0.278	0.362	0.00021169	1	Ptpra	Tfh
1.40326e-08	-0.313711	0.15	0.234	0.000392885	1	St3gal6	Tfh
2.95884e-08	-0.274073	0.131	0.213	0.000828415	1	Lrrc8c	Tfh
3.55075e-08	-0.362393	0.311	0.371	0.00099414	1	Sit1	Tfh
3.74915e-08	-0.665235	0.805	0.779	0.00104969	1	Lgals1	Tfh
3.78522e-08	-0.308178	0.193	0.269	0.00105979	1	Pik3r1	Tfh
3.92738e-08	-0.331625	0.397	0.453	0.00109959	1	Ppp1r12a	Tfh
4.1459e-08	-0.261589	0.572	0.616	0.00116077	1	Slfn1	Tfh
4.35921e-08	-0.333164	0.206	0.281	0.00122049	1	Fam78a	Tfh
5.4227e-08	0.920192	0.203	0.136	0.00151825	1	5830405F06Rik	Tfh
8.51871e-08	-0.296524	0.409	0.46	0.00238507	1	Cuta	Tfh
9.5088e-08	-0.305239	0.134	0.21	0.00266227	1	Plec	Tfh
1.17425e-07	-0.311201	0.367	0.418	0.00328768	1	Dock10	Tfh
1.18526e-07	-0.287014	0.166	0.239	0.0033185	1	Tmod3	Tfh
1.21717e-07	-0.329733	0.299	0.361	0.00340783	1	Gm2a	Tfh
1.60497e-07	-0.320157	0.242	0.311	0.0044936	1	Sh3bp1	Tfh
3.68172e-07	-0.291282	0.227	0.299	0.0103081	1	Sike1	Tfh
4.8772e-07	-0.343098	0.316	0.377	0.0136552	1	Bst2	Tfh
6.04632e-07	-0.290855	0.205	0.271	0.0169285	1	Card19	Tfh
7.12928e-07	-0.279393	0.231	0.303	0.0199605	1	Flt3l	Tfh
9.04443e-07	-0.314306	0.599	0.605	0.0253226	1	Ctsd	Tfh
9.78379e-07	-0.277271	0.533	0.562	0.0273927	1	Rapgef6	Tfh
1.09651e-06	-0.306986	0.327	0.389	0.0307001	1	Cdc25b	Tfh
1.3337e-06	-0.251858	0.533	0.554	0.0373409	1	Tes	Tfh
1.35544e-06	-0.303787	0.515	0.525	0.0379497	1	Glud1	Tfh
2.20081e-06	-0.297145	0.301	0.352	0.0616184	1	Prkd2	Tfh
2.27602e-06	-0.250297	0.113	0.175	0.063724	1	Chd7	Tfh
2.3789e-06	-0.263611	0.643	0.647	0.0666043	1	Ablim1	Tfh
2.46833e-06	-0.295515	0.228	0.295	0.0691084	1	Klk8	Tfh
4.15295e-06	-0.266145	0.353	0.406	0.116274	1	Whsc1l1	Tfh
4.29631e-06	-0.279734	0.352	0.393	0.120288	1	Zc3hav1	Tfh
4.38149e-06	-0.300172	0.171	0.233	0.122673	1	Gata3	Tfh
4.79878e-06	-0.254299	0.248	0.311	0.134356	1	Gpr132	Tfh
5.09569e-06	-0.25066	0.377	0.426	0.142669	1	Traf3ip3	Tfh
6.06324e-06	-0.264271	0.406	0.454	0.169759	1	Gm26740	Tfh
6.21303e-06	0.359396	0.918	0.887	0.173952	1	Eif5a	Tfh
6.54528e-06	-0.271044	0.517	0.532	0.183255	1	Arhgap15	Tfh
7.14014e-06	-0.263793	0.384	0.42	0.19991	1	Sugt1	Tfh
1.4197e-05	-0.279718	0.546	0.575	0.397487	1	Gimap7	Tfh
1.62622e-05	-0.265246	0.452	0.473	0.455308	1	Anapc11	Tfh
2.41996e-05	-0.260245	0.239	0.289	0.677539	1	Ifrd1	Tfh
2.4412e-05	-0.267679	0.194	0.246	0.683488	1	Usp48	Tfh
3.68055e-05	-0.267053	0.367	0.396	1	1	Cmtm7	Tfh
4.73257e-05	-0.258645	0.247	0.296	1	1	Hexb	Tfh
5.48982e-05	-0.266991	0.292	0.336	1	1	Myo1f	Tfh
6.98333e-05	-0.255063	0.502	0.514	1	1	Rexo2	Tfh
6.99693e-05	0.288789	0.691	0.602	1	1	Ncl	Tfh
7.51238e-05	-0.257646	0.279	0.318	1	1	4930453N24Rik	Tfh
8.41031e-05	-0.259057	0.222	0.271	1	1	Irf7	Tfh
0.000110646	-0.283251	0.313	0.348	1	1	Acot7	Tfh
0.000119135	-0.388405	0.154	0.203	1	1	Capg	Tfh
0.00015704	-0.254266	0.308	0.346	1	1	Cyth4	Tfh
0.000192396	-0.255338	0.348	0.366	1	1	Pik3cd	Tfh
0.000586437	-0.278362	0.171	0.217	1	1	Jun	Tfh
0.00434388	-0.260262	0.296	0.312	1	1	2810474O19Rik	Tfh
0.00518186	-0.387165	0.722	0.658	1	1	Itgb1	Tfh
0	2.46836	0.965	0.348	0	2	Nkg7	Th1
0	1.8024	0.567	0.037	0	2	Ccr2	Th1
2.27805e-302	1.94305	0.759	0.124	6.37808e-298	2	Cxcr6	Th1
6.83388e-242	1.90817	0.886	0.307	1.91335e-237	2	Id2	Th1
3.90233e-240	4.14191	0.791	0.235	1.09258e-235	2	Ccl5	Th1
2.55915e-179	1.86064	0.52	0.095	7.16511e-175	2	Lgals3	Th1
1.6164e-174	-0.870245	0.997	1	4.52558e-170	2	Rps20	Th1
2.67135e-169	1.16054	0.998	0.934	7.47925e-165	2	S100a10	Th1
5.52449e-166	-0.770758	1	1	1.54675e-161	2	Rplp1	Th1
7.19003e-165	1.61532	0.986	0.75	2.01307e-160	2	Lgals1	Th1
1.769e-164	2.16953	0.68	0.211	4.95284e-160	2	Ly6c2	Th1
2.65503e-162	1.15586	0.986	0.805	7.43354e-158	2	Selplg	Th1
1.59642e-160	1.31394	0.292	0.019	4.46965e-156	2	Gzmb	Th1
9.99515e-160	-0.80994	0.997	1	2.79844e-155	2	Rps29	Th1
3.47352e-155	1.6347	0.55	0.126	9.72517e-151	2	Ctla2a	Th1
9.54523e-155	1.28127	0.943	0.626	2.67247e-150	2	Epsti1	Th1
7.93282e-143	1.02139	0.989	0.859	2.22103e-138	2	Lsp1	Th1
4.8554e-142	1.20917	1	0.901	1.35942e-137	2	Crip1	Th1
2.62215e-135	1.19936	0.349	0.049	7.34148e-131	2	Anxa1	Th1
4.624e-131	0.549169	1	0.999	1.29463e-126	2	Tmsb4x	Th1
1.60078e-130	1.14214	0.902	0.571	4.48187e-126	2	Dnajc15	Th1
2.16302e-127	-0.689336	0.992	1	6.05602e-123	2	Rps28	Th1
2.14867e-124	1.25632	0.823	0.441	6.01585e-120	2	Zyx	Th1
2.36795e-121	0.924026	0.978	0.854	6.6298e-117	2	Sub1	Th1
1.18638e-117	1.1848	0.631	0.217	3.32162e-113	2	Ctsw	Th1
1.78322e-116	-0.586603	1	1	4.99266e-112	2	Rps24	Th1
1.39872e-108	-0.632406	0.997	0.999	3.91614e-104	2	Rps26	Th1
1.86487e-107	0.87791	0.954	0.769	5.22127e-103	2	S100a13	Th1
1.85673e-106	-0.778429	0.962	0.993	5.19847e-102	2	Rpl12	Th1
5.50568e-106	-0.486564	1	1	1.54148e-101	2	Rps3a1	Th1
7.79396e-105	1.12045	0.975	0.714	2.18215e-100	2	S100a6	Th1
4.49036e-103	-0.527686	1	1	1.25721e-98	2	Rps8	Th1
5.86053e-103	0.916761	0.945	0.785	1.64083e-98	2	Abracl	Th1
1.5042e-102	-0.476369	1	1	4.21146e-98	2	Rps15a	Th1
6.58655e-101	-0.479897	1	1	1.8441e-96	2	Rpl23	Th1
1.6985e-98	1.03676	0.515	0.172	4.75545e-94	2	Gna15	Th1
2.81339e-97	-0.437073	1	1	7.87693e-93	2	Rps27a	Th1
3.1901e-96	-0.470158	1	1	8.93165e-92	2	Rpl13	Th1
8.82185e-95	1.07709	0.685	0.3	2.46994e-90	2	Ifngr1	Th1
9.41464e-95	0.958765	0.862	0.548	2.63591e-90	2	Anxa6	Th1
1.22082e-94	-0.568061	1	1	3.41806e-90	2	Rps27	Th1
2.09446e-94	0.778902	0.99	0.926	5.86406e-90	2	Hcst	Th1
3.92477e-93	-0.745355	0.976	0.992	1.09886e-88	2	Rpl36a	Th1
1.1254e-92	0.759331	0.965	0.903	3.15091e-88	2	Cyba	Th1
1.49147e-90	0.818069	0.298	0.054	4.17582e-86	2	Bhlhe40	Th1
1.71368e-90	0.972878	0.805	0.415	4.79797e-86	2	S100a4	Th1
3.38169e-90	-0.444582	1	1	9.46805e-86	2	Rpsa	Th1
2.70008e-89	-1.26494	0.108	0.549	7.5597e-85	2	Nsg2	Th1
1.04363e-88	-0.605546	1	0.999	2.92195e-84	2	Rps19	Th1
1.8292e-88	0.910238	0.55	0.208	5.12139e-84	2	Hopx	Th1
3.05097e-88	0.640408	0.998	0.969	8.5421e-84	2	Ms4a4b	Th1
4.1558e-88	1.04928	0.721	0.358	1.16354e-83	2	Ahnak	Th1
1.01241e-85	-1.30205	0.228	0.652	2.83455e-81	2	Rgs10	Th1
1.01345e-85	-0.443991	1	1	2.83746e-81	2	Rps16	Th1
6.24463e-85	0.813566	0.924	0.7	1.74837e-80	2	Ostf1	Th1
1.20468e-84	-0.486545	0.998	1	3.37287e-80	2	Rpl35a	Th1
1.94457e-84	-0.619265	0.981	0.998	5.44441e-80	2	Rpl10	Th1
2.89759e-84	0.768056	0.959	0.836	8.11266e-80	2	Rap1b	Th1
3.06073e-84	0.80152	0.941	0.75	8.56944e-80	2	Cd47	Th1
4.36055e-84	1.09644	0.474	0.154	1.22087e-79	2	Plac8	Th1
3.37062e-83	-0.603588	0.99	0.997	9.43708e-79	2	Rps12	Th1
9.62241e-83	-1.05499	0.601	0.847	2.69408e-78	2	Tcf7	Th1
2.30838e-82	0.908527	0.803	0.475	6.46301e-78	2	Adgre5	Th1
3.42687e-82	0.416197	0.13	0.006	9.59456e-78	2	Tmem163	Th1
2.84706e-81	-0.516723	1	1	7.9712e-77	2	Rps2	Th1
8.77215e-81	0.962292	0.605	0.275	2.45603e-76	2	Glipr2	Th1
1.93474e-78	-0.465342	1	1	5.41689e-74	2	Rpl39	Th1
2.71025e-78	0.560461	1	0.983	7.58816e-74	2	Myl6	Th1
7.89446e-77	-1.5923	0.086	0.483	2.21029e-72	2	Id3	Th1
6.42688e-76	-0.395151	1	1	1.7994e-71	2	Rpl21	Th1
1.43308e-75	0.413016	0.135	0.008	4.01235e-71	2	1500009L16Rik	Th1
1.90935e-75	-0.371582	1	1	5.3458e-71	2	Rps10	Th1
2.07689e-75	-1.86304	0.086	0.473	5.81489e-71	2	Izumo1r	Th1
1.31936e-74	-0.406681	1	1	3.69396e-70	2	Rpl27a	Th1
2.43375e-74	0.802822	0.945	0.787	6.81401e-70	2	Tagln2	Th1
2.95583e-74	0.81557	0.897	0.714	8.27575e-70	2	Gabarapl2	Th1
3.28442e-73	-0.458218	1	1	9.19573e-69	2	Rpl8	Th1
1.35645e-72	0.890859	0.824	0.568	3.79779e-68	2	Ctsd	Th1
4.86971e-72	-0.979372	0.292	0.687	1.36342e-67	2	Tspan32	Th1
5.1737e-72	-0.459323	1	1	1.44853e-67	2	Rps7	Th1
3.52105e-71	-0.34859	1	1	9.85825e-67	2	Eef1a1	Th1
4.23111e-71	-0.477507	0.998	1	1.18463e-66	2	Rpl35	Th1
2.86618e-70	-0.440654	1	1	8.02473e-66	2	Rps21	Th1
9.18218e-68	0.669826	0.365	0.107	2.57083e-63	2	Cd226	Th1
1.90829e-67	-1.17555	0.133	0.51	5.34284e-63	2	Fam101b	Th1
5.09358e-67	-0.427769	0.994	1	1.4261e-62	2	Rpl15	Th1
3.13754e-66	0.708276	0.992	0.94	8.78447e-62	2	AW112010	Th1
5.09122e-66	-0.402857	0.997	1	1.42544e-61	2	Rplp2	Th1
7.40622e-66	0.700246	0.935	0.714	2.07359e-61	2	Emp3	Th1
1.27742e-65	0.85993	0.582	0.268	3.57651e-61	2	Il18r1	Th1
1.80515e-65	-0.411025	1	1	5.05406e-61	2	Rps9	Th1
1.20073e-64	-1.29902	0.101	0.468	3.36181e-60	2	Ccr7	Th1
2.14599e-63	0.812957	0.518	0.232	6.00834e-59	2	Gramd3	Th1
2.65554e-63	0.777941	0.792	0.563	7.43497e-59	2	Cd48	Th1
3.00673e-63	-0.462582	0.997	0.998	8.41823e-59	2	Rps18	Th1
4.00112e-62	0.611719	0.247	0.055	1.12023e-57	2	Plek	Th1
4.34172e-62	0.760621	0.799	0.527	1.21559e-57	2	Tpst2	Th1
6.67188e-62	0.770837	0.344	0.107	1.86799e-57	2	Il18rap	Th1
3.9085e-61	-0.402597	0.998	1	1.0943e-56	2	Rps23	Th1
6.54735e-61	0.3143	0.1	0.005	1.83313e-56	2	AA467197	Th1
1.25332e-60	-0.405615	1	1	3.50904e-56	2	Rps4x	Th1
1.91759e-60	-0.372957	1	1	5.36887e-56	2	Rpl37a	Th1
5.70222e-60	-0.511023	0.967	0.993	1.59651e-55	2	Limd2	Th1
2.05325e-59	0.772118	0.45	0.181	5.7487e-55	2	St3gal6	Th1
3.50794e-59	-0.42237	0.997	0.999	9.82154e-55	2	Rpl10a	Th1
6.69483e-59	0.380224	1	0.997	1.87442e-54	2	Rac2	Th1
1.82343e-58	-0.430392	1	0.999	5.10523e-54	2	Rpl28	Th1
3.29663e-58	0.672988	0.298	0.085	9.2299e-54	2	Slamf7	Th1
4.01502e-58	0.505031	0.913	0.716	1.12413e-53	2	Hmgb2	Th1
1.36505e-55	0.355109	0.116	0.01	3.82187e-51	2	Ccr5	Th1
2.56478e-55	0.740019	0.249	0.062	7.18088e-51	2	Klrc1	Th1
8.5097e-55	0.396774	1	0.998	2.38255e-50	2	H2-D1	Th1
8.78912e-55	-0.340335	0.998	1	2.46078e-50	2	Rpl37	Th1
4.26141e-53	0.702587	0.384	0.145	1.19311e-48	2	Tbx21	Th1
8.30974e-53	0.534047	0.987	0.934	2.32656e-48	2	Ms4a6b	Th1
2.09373e-52	0.338333	0.1	0.007	5.86202e-48	2	F2rl2	Th1
2.92642e-51	0.735838	0.712	0.463	8.19338e-47	2	S1pr4	Th1
1.66746e-50	0.612682	0.892	0.742	4.66855e-46	2	Arl6ip5	Th1
1.69097e-50	0.472235	0.986	0.94	4.73438e-46	2	Cdc42	Th1
2.4425e-49	0.370462	1	0.997	6.83852e-45	2	Cfl1	Th1
3.48791e-49	0.757291	0.732	0.514	9.76544e-45	2	Ccnd3	Th1
5.4403e-49	0.588204	0.223	0.056	1.52318e-44	2	Ctla2b	Th1
5.64422e-49	0.684683	0.672	0.412	1.58027e-44	2	Il2rb	Th1
1.57613e-48	-0.894962	0.174	0.485	4.41285e-44	2	Dennd2d	Th1
2.20432e-47	0.354352	0.998	0.995	6.17166e-43	2	Arhgdib	Th1
2.28768e-47	-0.360025	1	1	6.40505e-43	2	Rps5	Th1
3.0253e-47	0.596271	0.311	0.104	8.47023e-43	2	Dusp5	Th1
5.13451e-47	0.649739	0.875	0.765	1.43756e-42	2	Krtcap2	Th1
6.92782e-47	-0.322421	1	1	1.93965e-42	2	Rpl9	Th1
3.14417e-46	0.705524	0.821	0.675	8.80306e-42	2	Pycard	Th1
5.27956e-46	0.909807	0.78	0.584	1.47817e-41	2	Vim	Th1
1.04162e-45	-0.394708	0.994	0.998	2.91634e-41	2	Rpl7	Th1
3.90005e-45	-0.398503	0.995	0.997	1.09194e-40	2	Rpl26	Th1
7.06593e-45	0.756337	0.261	0.081	1.97832e-40	2	Klrd1	Th1
1.1069e-44	0.666838	0.642	0.396	3.0991e-40	2	Rnf166	Th1
1.33898e-44	-0.265407	1	1	3.74889e-40	2	Rpl19	Th1
1.42714e-43	-0.34076	0.994	1	3.9957e-39	2	Rpl22	Th1
3.81673e-43	0.371106	1	0.994	1.06861e-38	2	Cd52	Th1
7.41962e-43	-0.797901	0.197	0.485	2.07735e-38	2	Hmgn1	Th1
7.46396e-43	0.542638	0.906	0.77	2.08976e-38	2	Itgb7	Th1
8.89524e-43	0.456429	0.935	0.819	2.49049e-38	2	H2afz	Th1
1.1612e-42	0.612704	0.827	0.658	3.25112e-38	2	Itgb2	Th1
4.10365e-42	0.669142	0.75	0.525	1.14894e-37	2	Pglyrp1	Th1
1.17053e-40	0.658968	0.696	0.491	3.27725e-36	2	Rnf138	Th1
1.20161e-40	-0.305679	1	1	3.36427e-36	2	Rpl36	Th1
1.54511e-40	-0.294693	1	1	4.32601e-36	2	Rpl6	Th1
1.63172e-40	0.387789	0.997	0.976	4.56848e-36	2	Laptm5	Th1
3.44053e-40	-0.278314	1	1	9.63279e-36	2	Rpl18a	Th1
4.009e-40	-0.406674	0.976	0.993	1.12244e-35	2	Eef1b2	Th1
2.42491e-39	0.428065	0.975	0.93	6.78925e-35	2	Atp5l	Th1
7.56157e-39	0.451695	0.983	0.95	2.11709e-34	2	Calm1	Th1
1.29412e-38	0.381256	0.998	0.976	3.62327e-34	2	Fxyd5	Th1
1.74192e-38	-0.757099	0.249	0.529	4.87702e-34	2	Inpp4b	Th1
2.87648e-38	0.297613	0.106	0.015	8.05357e-34	2	Pik3ap1	Th1
4.53295e-38	0.653214	0.525	0.298	1.26913e-33	2	Lfng	Th1
7.40679e-38	0.60716	0.819	0.601	2.07375e-33	2	Itga4	Th1
2.61507e-37	0.728805	0.525	0.302	7.32168e-33	2	Glrx	Th1
2.63991e-37	0.647477	0.712	0.518	7.39122e-33	2	Stk24	Th1
4.25776e-37	-0.75141	0.035	0.268	1.19209e-32	2	Cxcr5	Th1
7.46577e-37	-0.331143	0.998	0.998	2.09027e-32	2	Rpl17	Th1
1.03182e-36	0.458181	0.976	0.85	2.88888e-32	2	S100a11	Th1
2.3156e-36	-0.328538	0.998	0.999	6.48321e-32	2	Rpl3	Th1
6.30746e-36	-0.683415	0.269	0.549	1.76596e-31	2	Tspan13	Th1
1.37549e-35	0.386741	1	0.998	3.85108e-31	2	Actg1	Th1
3.61024e-35	0.311298	1	1	1.0108e-30	2	Actb	Th1
1.95115e-34	0.536797	0.304	0.121	5.46282e-30	2	Rara	Th1
1.95867e-34	0.403016	0.978	0.922	5.48388e-30	2	Ppp1ca	Th1
3.74193e-34	0.473684	0.926	0.832	1.04766e-29	2	H2-Q7	Th1
6.23114e-34	0.295346	1	0.999	1.74459e-29	2	Rpl29	Th1
9.06445e-34	0.470041	0.301	0.121	2.53786e-29	2	Ppp3ca	Th1
1.7509e-33	-0.252088	1	1	4.90217e-29	2	Rps3	Th1
1.87968e-33	0.440936	0.208	0.065	5.26273e-29	2	Sema4a	Th1
6.84801e-33	-0.675538	0.103	0.337	1.91731e-28	2	Il6ra	Th1
7.81434e-33	0.624499	0.485	0.275	2.18786e-28	2	Rora	Th1
3.01928e-32	-0.676698	0.266	0.512	8.45339e-28	2	Asap1	Th1
3.03372e-32	0.571848	0.198	0.06	8.49381e-28	2	Gzmk	Th1
3.48409e-32	-0.711745	0.174	0.416	9.75475e-28	2	Actn1	Th1
4.43913e-32	0.584159	0.517	0.31	1.24287e-27	2	Cyth4	Th1
5.24563e-32	0.426506	0.914	0.824	1.46867e-27	2	Cox5a	Th1
9.74812e-32	-0.667331	0.204	0.451	2.72928e-27	2	Tesc	Th1
9.87267e-32	0.380907	0.971	0.928	2.76415e-27	2	Myl12a	Th1
1.25977e-31	0.359319	0.143	0.034	3.5271e-27	2	Errfi1	Th1
1.3206e-31	0.341973	0.99	0.971	3.69741e-27	2	Arpc2	Th1
1.59608e-31	0.454099	0.926	0.837	4.4687e-27	2	Arpc5	Th1
1.60908e-31	-0.259893	1	1	4.5051e-27	2	Rpl32	Th1
2.20598e-31	0.470871	0.252	0.095	6.17632e-27	2	Slamf1	Th1
2.30711e-31	0.442303	0.916	0.782	6.45945e-27	2	Prr13	Th1
4.42958e-31	0.471557	0.22	0.078	1.24019e-26	2	Ddx28	Th1
9.13366e-31	-0.763482	0.162	0.392	2.55724e-26	2	Tnfsf8	Th1
1.50002e-30	0.344168	0.146	0.037	4.19977e-26	2	Hip1	Th1
1.95211e-30	-0.678008	0.452	0.652	5.46551e-26	2	Slamf6	Th1
2.48573e-30	-0.510154	0.667	0.824	6.95955e-26	2	Mrpl52	Th1
2.95483e-30	0.549006	0.304	0.134	8.27294e-26	2	Podnl1	Th1
2.15704e-29	-0.654536	0.024	0.212	6.03928e-25	2	Tox2	Th1
3.36295e-29	0.508103	0.775	0.614	9.41558e-25	2	Rab8a	Th1
6.03254e-29	0.417184	0.242	0.093	1.68899e-24	2	St3gal4	Th1
7.33637e-29	0.509555	0.597	0.37	2.05404e-24	2	Arl4c	Th1
1.19299e-28	0.365553	0.967	0.901	3.34012e-24	2	Gmfg	Th1
1.37527e-28	0.409619	0.97	0.897	3.85048e-24	2	Tspo	Th1
2.63829e-28	0.497493	0.647	0.425	7.38669e-24	2	Rasgrp2	Th1
7.22831e-28	0.573431	0.712	0.546	2.02378e-23	2	Gimap7	Th1
1.23149e-27	-0.649113	0.136	0.353	3.44791e-23	2	Tox	Th1
1.60048e-27	-0.656494	0.26	0.49	4.48104e-23	2	2310001H17Rik	Th1
2.54093e-27	0.544761	0.502	0.315	7.1141e-23	2	Acot7	Th1
2.79972e-27	-0.646006	0.162	0.392	7.83865e-23	2	Fos	Th1
3.59314e-27	0.358023	0.975	0.934	1.00601e-22	2	Actr3	Th1
3.62299e-27	0.344835	0.964	0.921	1.01437e-22	2	2022-09-01	Th1
4.34592e-27	0.447449	0.808	0.706	1.21677e-22	2	H2afy	Th1
4.79983e-27	0.487016	0.301	0.137	1.34386e-22	2	Sgk1	Th1
5.35698e-27	0.36713	0.959	0.89	1.49985e-22	2	Ppp1r18	Th1
7.13617e-27	-0.393448	0.99	0.988	1.99798e-22	2	Ftl1	Th1
1.67927e-26	0.529794	0.656	0.498	4.70162e-22	2	Ctsa	Th1
1.72519e-26	0.271928	0.101	0.021	4.83019e-22	2	Ncald	Th1
2.1186e-26	0.45312	0.319	0.152	5.93165e-22	2	2010111I01Rik	Th1
3.097e-26	0.346261	0.168	0.053	8.67099e-22	2	Sytl1	Th1
3.69502e-26	-0.743154	0.014	0.178	1.03453e-21	2	Sell	Th1
3.90047e-26	0.48411	0.762	0.608	1.09205e-21	2	Samhd1	Th1
4.55816e-26	0.529066	0.334	0.173	1.27619e-21	2	Nptn	Th1
5.97167e-26	0.270598	0.108	0.024	1.67195e-21	2	Snai3	Th1
7.10293e-26	0.496712	0.784	0.647	1.98868e-21	2	Reep5	Th1
7.81429e-26	0.526591	0.594	0.418	2.18784e-21	2	Ppp1r12a	Th1
9.76038e-26	0.459094	0.22	0.087	2.73271e-21	2	Runx2	Th1
2.68097e-25	-0.522343	0.014	0.174	7.50618e-21	2	Ephx1	Th1
4.06246e-25	0.396013	0.895	0.805	1.13741e-20	2	Prelid1	Th1
5.57363e-25	0.352833	0.965	0.891	1.5605e-20	2	Arpc3	Th1
5.82113e-25	-0.365601	0.878	0.952	1.6298e-20	2	mt-Nd2	Th1
6.39001e-25	0.523262	0.361	0.199	1.78908e-20	2	Txndc5	Th1
7.05436e-25	0.508389	0.363	0.199	1.97508e-20	2	Crot	Th1
8.03186e-25	-0.343937	0.962	0.986	2.24876e-20	2	Rps6	Th1
9.46365e-25	0.257046	1	0.995	2.64963e-20	2	Coro1a	Th1
1.58153e-24	0.363542	0.957	0.91	4.42797e-20	2	Il2rg	Th1
2.47981e-24	-0.552691	0.688	0.824	6.94296e-20	2	Gpx1	Th1
5.26642e-24	0.326283	0.139	0.041	1.47449e-19	2	Lair1	Th1
5.94943e-24	-0.494312	0.019	0.175	1.66572e-19	2	Pacsin1	Th1
6.64636e-24	0.44808	0.761	0.629	1.86085e-19	2	1810058I24Rik	Th1
7.3517e-24	0.304863	0.117	0.03	2.05833e-19	2	Tm6sf1	Th1
1.39098e-23	-0.47785	0.01	0.157	3.89448e-19	2	Tnfsf11	Th1
2.31555e-23	0.324117	0.979	0.922	6.48308e-19	2	Tceb2	Th1
2.41133e-23	0.47085	0.609	0.433	6.75123e-19	2	Efhd2	Th1
2.60153e-23	0.435544	0.799	0.659	7.28376e-19	2	Mrpl33	Th1
3.25253e-23	-0.523056	0.025	0.183	9.10644e-19	2	Matk	Th1
3.5621e-23	0.30251	0.968	0.938	9.97317e-19	2	Atp5h	Th1
4.96511e-23	0.338786	0.177	0.064	1.39013e-18	2	2022-09-11	Th1
5.20262e-23	0.462705	0.482	0.303	1.45663e-18	2	Myo1f	Th1
5.68903e-23	0.438896	0.734	0.558	1.59281e-18	2	Cxcr3	Th1
7.71532e-23	0.497244	0.434	0.264	2.16013e-18	2	Dok2	Th1
8.50284e-23	0.422276	0.368	0.198	2.38062e-18	2	Cdc42ep3	Th1
2.37376e-22	0.372681	0.916	0.865	6.64604e-18	2	Arl6ip1	Th1
2.72123e-22	0.38158	0.192	0.073	7.6189e-18	2	Ifitm10	Th1
3.76526e-22	0.398403	0.8	0.668	1.0542e-17	2	Csnk2b	Th1
5.3911e-22	-0.597216	0.436	0.621	1.5094e-17	2	Zfp36l1	Th1
9.58784e-22	0.499188	0.762	0.645	2.6844e-17	2	Aprt	Th1
1.23731e-21	0.283382	0.158	0.055	3.46421e-17	2	Agpat4	Th1
1.90078e-21	0.393363	0.864	0.75	5.3218e-17	2	Supt4a	Th1
2.34444e-21	0.467088	0.344	0.19	6.56396e-17	2	Rpa2	Th1
2.68915e-21	0.389668	0.222	0.095	7.52909e-17	2	Prkx	Th1
2.9868e-21	0.403793	0.78	0.67	8.36245e-17	2	Ndufb7	Th1
4.00591e-21	-0.516228	0.092	0.264	1.12157e-16	2	Thada	Th1
4.70713e-21	0.320066	0.968	0.945	1.3179e-16	2	Clic1	Th1
5.25976e-21	0.485072	0.425	0.264	1.47263e-16	2	Sike1	Th1
6.11478e-21	-0.442793	0.055	0.217	1.71202e-16	2	St6gal1	Th1
6.90238e-21	-0.500124	0.105	0.279	1.93253e-16	2	Adk	Th1
1.46848e-20	0.627731	0.314	0.166	4.11144e-16	2	Cd7	Th1
3.60642e-20	0.251172	0.1	0.026	1.00972e-15	2	Hid1	Th1
5.43069e-20	-0.509791	0.325	0.509	1.52048e-15	2	Tnfaip8	Th1
5.66885e-20	0.404841	0.818	0.713	1.58716e-15	2	Tbc1d10c	Th1
7.56073e-20	0.265235	0.113	0.033	2.11685e-15	2	Sytl2	Th1
7.57008e-20	0.3141	0.962	0.915	2.11947e-15	2	Capzb	Th1
1.15609e-19	0.395072	0.784	0.681	3.23682e-15	2	Apbb1ip	Th1
1.21572e-19	0.283552	0.998	0.971	3.40378e-15	2	Ucp2	Th1
1.37261e-19	0.324621	0.143	0.05	3.84303e-15	2	Arl4d	Th1
1.76215e-19	0.374967	0.835	0.642	4.93368e-15	2	Itgb1	Th1
1.89989e-19	0.374469	0.244	0.115	5.31932e-15	2	Galnt10	Th1
3.31965e-19	-0.436714	0.078	0.239	9.29436e-15	2	Aff3	Th1
3.55972e-19	-0.430259	0.349	0.549	9.96649e-15	2	Evl	Th1
3.9955e-19	-0.426259	0.141	0.323	1.11866e-14	2	Pigp	Th1
4.10794e-19	0.418856	0.39	0.238	1.15014e-14	2	Runx3	Th1
4.40307e-19	0.377703	0.296	0.156	1.23277e-14	2	D16Ertd472e	Th1
7.58305e-19	0.368876	0.848	0.756	2.1231e-14	2	Bin2	Th1
8.6182e-19	0.458688	0.588	0.439	2.41292e-14	2	Spn	Th1
8.72661e-19	-0.394565	0.027	0.16	2.44328e-14	2	Cd200	Th1
1.14976e-18	-0.6055	0.326	0.498	3.2191e-14	2	Ddit4	Th1
1.84588e-18	0.421194	0.577	0.438	5.16809e-14	2	Ap3s1	Th1
1.94419e-18	0.306442	0.987	0.971	5.44334e-14	2	Hspa8	Th1
2.1196e-18	0.462256	0.276	0.15	5.93446e-14	2	Serpinb6b	Th1
2.27098e-18	-0.440128	0.006	0.122	6.35829e-14	2	Ramp1	Th1
2.88978e-18	0.348087	0.875	0.809	8.09082e-14	2	Psmb3	Th1
2.98271e-18	-0.440045	0.868	0.94	8.35098e-14	2	Ltb	Th1
4.19157e-18	0.4609	0.55	0.406	1.17356e-13	2	Nfatc3	Th1
4.54326e-18	0.31806	0.941	0.81	1.27202e-13	2	Klf2	Th1
4.57318e-18	0.364347	0.856	0.765	1.2804e-13	2	Ndufv3	Th1
5.73178e-18	0.272322	0.99	0.972	1.60478e-13	2	Psmb8	Th1
6.68709e-18	0.269037	0.975	0.949	1.87225e-13	2	Ywhaz	Th1
7.65629e-18	0.309637	0.918	0.828	2.14361e-13	2	Arpc4	Th1
1.05966e-17	0.347338	0.786	0.691	2.96683e-13	2	Atox1	Th1
1.31265e-17	0.42605	0.39	0.244	3.67516e-13	2	Tmem154	Th1
1.60168e-17	0.256158	0.119	0.039	4.48437e-13	2	Acsbg1	Th1
1.75995e-17	0.359131	0.919	0.872	4.9275e-13	2	Thy1	Th1
2.09254e-17	-0.350999	0.008	0.12	5.85868e-13	2	Gm14718	Th1
2.15146e-17	-0.872436	0.016	0.132	6.02366e-13	2	Ly6c1	Th1
2.46665e-17	0.362489	0.227	0.11	6.90612e-13	2	Il10ra	Th1
2.662e-17	0.370245	0.981	0.94	7.45307e-13	2	Ly6a	Th1
2.97235e-17	0.414937	0.384	0.239	8.32198e-13	2	Capn2	Th1
2.97664e-17	0.366787	0.637	0.503	8.334e-13	2	1110008P14Rik	Th1
3.17683e-17	0.338471	0.254	0.131	8.89449e-13	2	Sntb2	Th1
7.17739e-17	-0.359464	0.021	0.138	2.00953e-12	2	Il6st	Th1
7.56455e-17	-0.33473	0.937	0.955	2.11792e-12	2	Npm1	Th1
9.06871e-17	-0.419428	0.544	0.692	2.53906e-12	2	Gltp	Th1
1.19596e-16	0.420565	0.458	0.308	3.34845e-12	2	Esyt1	Th1
1.69912e-16	-0.418276	0.355	0.525	4.75719e-12	2	Ctss	Th1
1.7218e-16	0.341109	0.875	0.778	4.82069e-12	2	Rsrp1	Th1
2.18695e-16	-0.438762	0.098	0.245	6.12303e-12	2	Tbc1d4	Th1
3.52568e-16	0.394536	0.353	0.218	9.8712e-12	2	Usp48	Th1
3.93449e-16	0.323101	0.884	0.804	1.10158e-11	2	Eno1	Th1
4.9935e-16	0.310765	0.884	0.797	1.39808e-11	2	Gnb2	Th1
6.87429e-16	0.384507	0.369	0.235	1.92466e-11	2	Nsmaf	Th1
7.34895e-16	0.251187	0.114	0.039	2.05756e-11	2	Atp2b4	Th1
7.83021e-16	0.377979	0.685	0.561	2.1923e-11	2	Fmnl1	Th1
9.5149e-16	-0.338456	0.055	0.188	2.66398e-11	2	Rnf19a	Th1
1.06573e-15	-0.428946	0.244	0.412	2.98384e-11	2	Pdlim1	Th1
1.22568e-15	0.385004	0.268	0.151	3.43166e-11	2	Ube2g2	Th1
1.25698e-15	-0.406365	0.231	0.4	3.5193e-11	2	Rps26-ps1	Th1
1.40236e-15	-0.252808	0.989	0.995	3.92631e-11	2	mt-Cytb	Th1
1.54885e-15	-0.313435	0.933	0.962	4.33646e-11	2	Rpl22l1	Th1
1.80663e-15	0.352718	0.219	0.11	5.05819e-11	2	BC094916	Th1
1.85849e-15	-0.384506	0.086	0.223	5.20339e-11	2	P2rx7	Th1
1.9287e-15	0.291218	0.182	0.082	5.39996e-11	2	Pik3r5	Th1
2.32072e-15	0.354487	0.745	0.651	6.49755e-11	2	Txn1	Th1
2.36422e-15	0.317121	0.902	0.856	6.61933e-11	2	Ppib	Th1
3.53354e-15	-0.392968	0.146	0.301	9.89319e-11	2	Sesn3	Th1
3.61677e-15	0.310312	0.155	0.066	1.01262e-10	2	Lztfl1	Th1
3.77625e-15	-1.18041	0.021	0.125	1.05728e-10	2	Igfbp4	Th1
4.32304e-15	-0.400106	0.739	0.836	1.21036e-10	2	Junb	Th1
4.86659e-15	0.415321	0.417	0.295	1.36255e-10	2	Idh3a	Th1
5.15397e-15	0.415406	0.496	0.352	1.44301e-10	2	Sidt1	Th1
5.50858e-15	0.435602	0.51	0.378	1.54229e-10	2	Tpm4	Th1
5.63203e-15	-0.74002	0.014	0.114	1.57685e-10	2	Dapl1	Th1
6.44767e-15	-0.483622	0.266	0.416	1.80522e-10	2	Mrps6	Th1
6.80489e-15	-0.501011	0.276	0.432	1.90523e-10	2	Bcl2	Th1
7.20775e-15	-0.263185	0.954	0.957	2.01803e-10	2	mt-Nd1	Th1
7.99075e-15	0.347902	0.764	0.671	2.23725e-10	2	Fam107b	Th1
8.7933e-15	0.361836	0.209	0.106	2.46195e-10	2	Ifng	Th1
1.07654e-14	0.250206	0.964	0.937	3.0141e-10	2	Sumo2	Th1
1.26487e-14	-0.47193	0.493	0.634	3.54138e-10	2	Lef1	Th1
1.3181e-14	0.39268	0.303	0.184	3.69041e-10	2	Fam204a	Th1
1.34164e-14	0.306211	0.222	0.115	3.75633e-10	2	Smpd1	Th1
1.9336e-14	0.319906	0.255	0.14	5.41368e-10	2	Flot1	Th1
2.07676e-14	0.458596	0.571	0.463	5.81452e-10	2	Atp1a1	Th1
2.34955e-14	0.362607	0.358	0.237	6.57826e-10	2	Unc119	Th1
2.8366e-14	0.281031	0.951	0.907	7.94191e-10	2	Ube2d3	Th1
2.84341e-14	0.309939	0.799	0.723	7.96098e-10	2	Cox6a1	Th1
3.53483e-14	0.337211	0.564	0.432	9.8968e-10	2	Cuta	Th1
3.94074e-14	0.380083	0.431	0.304	1.10333e-09	2	Tcf3	Th1
4.40677e-14	-0.494416	0.288	0.438	1.23381e-09	2	Tuba1b	Th1
4.48929e-14	0.366401	0.331	0.204	1.25691e-09	2	Gata3	Th1
4.94655e-14	0.282737	0.9	0.837	1.38493e-09	2	Psmb1	Th1
5.07951e-14	-0.386399	0.171	0.324	1.42216e-09	2	Znrf1	Th1
5.31464e-14	0.273355	0.13	0.053	1.48799e-09	2	Ptpn4	Th1
5.41163e-14	0.36873	0.493	0.362	1.51515e-09	2	Degs1	Th1
6.8292e-14	-0.340759	0.304	0.471	1.91204e-09	2	Mrpl23	Th1
7.4353e-14	0.321626	0.184	0.09	2.08174e-09	2	B3gat3	Th1
8.21976e-14	0.408905	0.433	0.307	2.30137e-09	2	Myo1g	Th1
8.33158e-14	-0.443744	0.487	0.633	2.33268e-09	2	Zfp36	Th1
8.96562e-14	0.325964	0.23	0.124	2.51019e-09	2	Aim1	Th1
9.47509e-14	0.324783	0.797	0.713	2.65283e-09	2	Cdc42se1	Th1
1.00242e-13	-0.330205	0.472	0.639	2.80656e-09	2	Lamp1	Th1
1.21132e-13	0.399781	0.578	0.459	3.39146e-09	2	Tram1	Th1
1.23726e-13	0.315043	0.242	0.135	3.46407e-09	2	Cry1	Th1
1.31165e-13	0.273954	0.916	0.857	3.67236e-09	2	Gimap4	Th1
1.38722e-13	-0.302663	0.025	0.125	3.88393e-09	2	A630023P12Rik	Th1
1.39286e-13	-0.365809	0.493	0.646	3.89972e-09	2	Gm9493	Th1
1.57831e-13	-0.276824	0.868	0.921	4.41894e-09	2	Rpl5	Th1
2.88142e-13	0.344866	0.616	0.499	8.0674e-09	2	Xrn2	Th1
2.91223e-13	0.368285	0.555	0.442	8.15365e-09	2	Ech1	Th1
2.97296e-13	-0.326935	0.113	0.251	8.32369e-09	2	Tspan3	Th1
3.53749e-13	0.336524	0.789	0.693	9.90426e-09	2	Dynll1	Th1
3.61653e-13	0.387228	0.59	0.476	1.01256e-08	2	Ifi203	Th1
3.74816e-13	-0.418101	0.312	0.453	1.04941e-08	2	Rpa1	Th1
4.2916e-13	0.310378	0.309	0.189	1.20156e-08	2	Mical1	Th1
5.04031e-13	0.2586	0.926	0.887	1.41119e-08	2	Cox5b	Th1
5.3297e-13	-0.375442	0.385	0.539	1.49221e-08	2	Rhoh	Th1
5.68582e-13	0.371019	0.536	0.417	1.59192e-08	2	Sla	Th1
6.80475e-13	-0.437859	0.409	0.526	1.90519e-08	2	Smco4	Th1
6.95914e-13	0.295004	0.811	0.734	1.94842e-08	2	Tmed2	Th1
7.22762e-13	0.332496	0.306	0.192	2.02359e-08	2	Ttc39c	Th1
7.7111e-13	-0.395962	0.139	0.274	2.15895e-08	2	1110034G24Rik	Th1
9.37403e-13	0.306598	0.712	0.605	2.62454e-08	2	Sec11c	Th1
9.44265e-13	-0.350791	0.116	0.245	2.64375e-08	2	Ssh2	Th1
1.00288e-12	-0.389695	0.106	0.23	2.80786e-08	2	Ppp1r14b	Th1
1.02036e-12	-0.329619	0.648	0.767	2.85681e-08	2	Srrm2	Th1
1.2247e-12	0.334351	0.376	0.247	3.42892e-08	2	Cd96	Th1
1.28927e-12	0.356265	0.68	0.581	3.6097e-08	2	Ccdc12	Th1
1.43019e-12	-0.402377	0.223	0.371	4.00426e-08	2	Rnaset2a	Th1
1.55576e-12	-0.331699	0.033	0.13	4.35581e-08	2	Bmyc	Th1
1.90792e-12	0.323583	0.719	0.626	5.34181e-08	2	Tmem234	Th1
2.05551e-12	-0.251137	0.937	0.938	5.75503e-08	2	mt-Nd4	Th1
2.17752e-12	0.323335	0.704	0.6	6.09663e-08	2	Uqcrfs1	Th1
2.37799e-12	0.340808	0.517	0.392	6.65789e-08	2	Hsd11b1	Th1
2.89499e-12	0.357244	0.458	0.329	8.1054e-08	2	Atp2b1	Th1
3.02775e-12	0.343724	0.182	0.093	8.47709e-08	2	Apobec2	Th1
3.43774e-12	0.309619	0.496	0.374	9.62499e-08	2	Cmtm7	Th1
3.77047e-12	0.31133	0.219	0.121	1.05566e-07	2	St6galnac3	Th1
3.95246e-12	0.26504	0.144	0.067	1.10661e-07	2	Il12rb1	Th1
4.81844e-12	0.312286	0.241	0.142	1.34907e-07	2	AU020206	Th1
5.32251e-12	-0.333591	0.97	0.979	1.4902e-07	2	Ptma	Th1
6.29309e-12	-0.347204	0.114	0.238	1.76194e-07	2	Mgst2	Th1
6.31877e-12	0.344166	0.571	0.468	1.76913e-07	2	Cmpk1	Th1
6.65519e-12	0.315007	0.315	0.205	1.86332e-07	2	Ctsc	Th1
6.69848e-12	0.365151	0.458	0.336	1.87544e-07	2	Dtx1	Th1
6.73989e-12	0.262374	0.138	0.063	1.88703e-07	2	Gpr68	Th1
7.28433e-12	0.313243	0.712	0.62	2.03947e-07	2	Cnp	Th1
7.77653e-12	0.275202	0.168	0.084	2.17727e-07	2	Emp1	Th1
8.12757e-12	0.275704	0.147	0.07	2.27556e-07	2	Rhoc	Th1
1.08535e-11	0.346349	0.281	0.177	3.03876e-07	2	Rcbtb2	Th1
1.15502e-11	0.301508	0.761	0.678	3.23383e-07	2	Vasp	Th1
1.2299e-11	0.340173	0.655	0.573	3.44348e-07	2	Grap	Th1
1.232e-11	-0.343898	0.135	0.258	3.44934e-07	2	Trib2	Th1
1.37007e-11	0.306054	0.216	0.121	3.83592e-07	2	Lpar6	Th1
1.37541e-11	0.35402	0.252	0.155	3.85087e-07	2	Rnf13	Th1
1.38256e-11	0.291419	0.631	0.517	3.8709e-07	2	Txnip	Th1
1.43607e-11	0.333619	0.357	0.243	4.02071e-07	2	Card19	Th1
1.50199e-11	0.315912	0.753	0.669	4.20527e-07	2	Sh3bgrl3	Th1
1.51252e-11	0.301194	0.19	0.104	4.23476e-07	2	Lxn	Th1
1.69805e-11	0.256339	0.911	0.87	4.7542e-07	2	Tmbim6	Th1
1.8796e-11	-0.409803	0.271	0.413	5.2625e-07	2	Cd69	Th1
1.92176e-11	-0.323444	0.456	0.606	5.38055e-07	2	Rps27rt	Th1
1.9553e-11	0.308844	0.507	0.389	5.47445e-07	2	Pstpip1	Th1
2.32631e-11	0.343433	0.366	0.255	6.5132e-07	2	Lax1	Th1
2.33843e-11	0.278811	0.219	0.124	6.54713e-07	2	Ggh	Th1
2.41492e-11	0.351493	0.52	0.413	6.76128e-07	2	Sms	Th1
2.75457e-11	0.337617	0.621	0.523	7.71225e-07	2	Higd1a	Th1
2.88925e-11	-0.268817	0.055	0.156	8.08933e-07	2	Apex1	Th1
3.00367e-11	0.304454	0.165	0.084	8.40969e-07	2	Serpinb9	Th1
3.14848e-11	-0.442262	0.139	0.262	8.81512e-07	2	Socs1	Th1
4.22512e-11	0.299597	0.743	0.647	1.18295e-06	2	Tprgl	Th1
5.09041e-11	0.265355	0.664	0.584	1.42521e-06	2	Tmem14c	Th1
5.46068e-11	-0.278461	0.03	0.116	1.52888e-06	2	Nt5e	Th1
5.4793e-11	-0.292035	0.097	0.209	1.53409e-06	2	Mpp1	Th1
5.67237e-11	0.316252	0.65	0.553	1.58815e-06	2	Lgals9	Th1
5.89044e-11	0.305402	0.566	0.468	1.6492e-06	2	Rab1b	Th1
7.22062e-11	-0.312309	0.334	0.477	2.02163e-06	2	Fam134b	Th1
8.39183e-11	0.31582	0.439	0.333	2.34954e-06	2	Mapre2	Th1
9.25307e-11	0.28061	0.493	0.375	2.59067e-06	2	Klf6	Th1
9.73912e-11	-0.256439	0.686	0.808	2.72676e-06	2	Nop10	Th1
1.01642e-10	-0.520035	0.046	0.137	2.84579e-06	2	Egr1	Th1
1.31042e-10	0.325527	0.58	0.493	3.66892e-06	2	Srp19	Th1
1.34681e-10	0.303687	0.326	0.224	3.77078e-06	2	Dcaf12	Th1
1.68335e-10	-0.405429	0.254	0.382	4.71304e-06	2	Pde4b	Th1
1.82394e-10	0.3093	0.558	0.459	5.10667e-06	2	Dnajb6	Th1
1.92539e-10	-0.337548	0.368	0.502	5.3907e-06	2	Lbh	Th1
2.17429e-10	0.253632	0.819	0.743	6.08759e-06	2	Capza1	Th1
2.39722e-10	-0.38106	0.447	0.56	6.71173e-06	2	BC021614	Th1
2.71881e-10	0.291484	0.531	0.427	7.61213e-06	2	Lamtor5	Th1
3.03561e-10	0.315657	0.39	0.284	8.4991e-06	2	Bscl2	Th1
3.18734e-10	-0.357427	0.274	0.415	8.9239e-06	2	Foxp1	Th1
3.37082e-10	-0.258289	0.049	0.139	9.43761e-06	2	Chchd10	Th1
3.75647e-10	0.299618	0.342	0.237	1.05174e-05	2	Mina	Th1
4.51929e-10	0.27295	0.179	0.099	1.26531e-05	2	Golm1	Th1
4.72286e-10	0.314812	0.539	0.428	1.32231e-05	2	Rasa3	Th1
4.81131e-10	-0.313547	0.563	0.681	1.34707e-05	2	Il16	Th1
4.86678e-10	-0.262975	0.033	0.114	1.3626e-05	2	Tdrp	Th1
4.98248e-10	0.259077	0.211	0.124	1.39499e-05	2	Camk2g	Th1
5.08417e-10	-0.312746	0.48	0.605	1.42347e-05	2	Eif4b	Th1
5.44933e-10	0.275144	0.705	0.651	1.5257e-05	2	1810037I17Rik	Th1
5.53091e-10	-0.298937	0.209	0.335	1.54855e-05	2	Btf3l4	Th1
6.40139e-10	0.300739	0.628	0.52	1.79226e-05	2	Gimap5	Th1
6.76443e-10	0.294029	0.222	0.137	1.8939e-05	2	Pqlc3	Th1
8.42815e-10	-0.304444	0.208	0.334	2.35971e-05	2	Bzw2	Th1
9.21186e-10	0.352555	0.353	0.256	2.57914e-05	2	Lgals3bp	Th1
9.40627e-10	0.327761	0.471	0.371	2.63357e-05	2	Prex1	Th1
9.64705e-10	-0.534522	0.141	0.248	2.70098e-05	2	Ikzf2	Th1
1.28514e-09	0.289655	0.197	0.116	3.59812e-05	2	Ak3	Th1
1.48171e-09	-0.360834	0.464	0.589	4.1485e-05	2	Stat1	Th1
1.52393e-09	-0.36753	0.12	0.223	4.26671e-05	2	Dusp1	Th1
1.58224e-09	0.271325	0.78	0.695	4.42995e-05	2	Cap1	Th1
1.63537e-09	0.287132	0.382	0.276	4.57872e-05	2	Flt3l	Th1
1.79069e-09	-0.332492	0.043	0.125	5.01357e-05	2	Marcksl1	Th1
1.86378e-09	-0.259552	0.16	0.277	5.2182e-05	2	Atic	Th1
2.41374e-09	-0.298044	0.628	0.721	6.75799e-05	2	Hspe1	Th1
2.5568e-09	-0.295491	0.138	0.245	7.15853e-05	2	Abcb9	Th1
2.83984e-09	0.294646	0.55	0.456	7.95098e-05	2	Anapc11	Th1
2.92282e-09	0.292403	0.361	0.263	8.18331e-05	2	Dnajc1	Th1
2.9951e-09	0.294538	0.166	0.093	8.38567e-05	2	Thtpa	Th1
3.27413e-09	0.306026	0.588	0.509	9.1669e-05	2	Ap2s1	Th1
3.61652e-09	0.35121	0.436	0.349	0.000101255	2	Phf11b	Th1
3.67687e-09	-0.285428	0.098	0.198	0.000102945	2	Timp2	Th1
3.73609e-09	0.285852	0.58	0.482	0.000104603	2	Hsp90b1	Th1
3.84741e-09	0.300452	0.618	0.543	0.00010772	2	Cwc15	Th1
4.18235e-09	0.264013	0.274	0.177	0.000117097	2	Gbp7	Th1
4.38721e-09	-0.257396	0.097	0.196	0.000122833	2	Fas	Th1
4.47211e-09	-0.321011	0.645	0.741	0.00012521	2	Tubb5	Th1
5.05567e-09	0.276043	0.173	0.099	0.000141549	2	Gm44160	Th1
5.30991e-09	-0.293813	0.406	0.534	0.000148667	2	Cirbp	Th1
6.05069e-09	0.276681	0.436	0.337	0.000169407	2	Gng2	Th1
6.05169e-09	0.279124	0.384	0.283	0.000169435	2	Mtpn	Th1
6.54744e-09	0.31794	0.418	0.326	0.000183315	2	Kcnab2	Th1
6.89797e-09	-0.266894	0.181	0.297	0.000193129	2	Bri3bp	Th1
7.01252e-09	-0.278163	0.101	0.198	0.000196336	2	Ccdc28b	Th1
8.50009e-09	0.276564	0.468	0.371	0.000237985	2	Cript	Th1
8.63218e-09	0.270542	0.404	0.306	0.000241684	2	Ebp	Th1
1.12823e-08	0.281897	0.204	0.128	0.000315881	2	Orc3	Th1
1.23508e-08	-0.332626	0.456	0.574	0.000345797	2	Rapgef6	Th1
1.29522e-08	-0.301023	0.52	0.634	0.000362636	2	Ncl	Th1
1.38108e-08	-0.270859	0.601	0.701	0.000386675	2	Tpr	Th1
1.59377e-08	-0.262384	0.046	0.122	0.000446223	2	Ssbp2	Th1
1.80744e-08	0.270096	0.593	0.512	0.000506046	2	Rbms1	Th1
1.94941e-08	-0.2507	0.054	0.133	0.000545797	2	Nab2	Th1
2.2405e-08	-0.268496	0.599	0.708	0.000627296	2	Eif4a1	Th1
2.3545e-08	0.308962	0.374	0.29	0.000659214	2	Sirt2	Th1
2.43434e-08	-0.271801	0.184	0.292	0.000681568	2	Gm10073	Th1
2.43882e-08	-0.310062	0.208	0.311	0.000682821	2	Impdh2	Th1
3.05295e-08	0.273092	0.317	0.229	0.000854764	2	Pcmt1	Th1
3.15047e-08	0.250704	0.219	0.139	0.000882067	2	Fam188a	Th1
3.47513e-08	0.264408	0.319	0.232	0.000972967	2	Rab19	Th1
3.60512e-08	0.268345	0.537	0.451	0.00100936	2	Glmp	Th1
3.60612e-08	-0.308547	0.125	0.223	0.00100964	2	Jun	Th1
4.09119e-08	0.258281	0.309	0.219	0.00114545	2	Sdcbp2	Th1
4.1588e-08	0.257591	0.601	0.525	0.00116438	2	Rwdd1	Th1
4.64856e-08	-0.314098	0.409	0.523	0.0013015	2	Hspa5	Th1
4.65532e-08	-0.295243	0.071	0.153	0.0013034	2	Rgcc	Th1
4.91796e-08	0.281989	0.353	0.263	0.00137693	2	Tnfrsf25	Th1
4.96706e-08	-0.26525	0.414	0.534	0.00139068	2	Hspa4	Th1
4.99967e-08	0.266548	0.444	0.357	0.00139981	2	Med30	Th1
5.13061e-08	0.262534	0.509	0.416	0.00143647	2	Psma5	Th1
5.35597e-08	0.275716	0.369	0.281	0.00149957	2	Bak1	Th1
5.99094e-08	0.268748	0.261	0.179	0.00167734	2	Gnpda1	Th1
6.04216e-08	-0.2549	0.865	0.921	0.00169168	2	Btg1	Th1
6.16323e-08	0.255647	0.317	0.227	0.00172558	2	Gm19585	Th1
6.41871e-08	-0.306892	0.406	0.516	0.00179711	2	Prkch	Th1
6.61032e-08	-0.283171	0.498	0.61	0.00185076	2	Rbm38	Th1
6.9462e-08	0.257029	0.512	0.433	0.0019448	2	Mrpl20	Th1
7.32891e-08	-0.259799	0.152	0.255	0.00205195	2	Ipcef1	Th1
8.85064e-08	-0.340618	0.279	0.397	0.002478	2	Gm26917	Th1
9.11686e-08	-0.275928	0.374	0.498	0.00255254	2	Nap1l4	Th1
1.10782e-07	0.297475	0.474	0.398	0.00310166	2	Sft2d1	Th1
1.43201e-07	0.26579	0.292	0.21	0.00400934	2	Arrdc1	Th1
1.62514e-07	0.274356	0.49	0.412	0.00455006	2	Cox17	Th1
1.70446e-07	-0.250876	0.292	0.409	0.00477215	2	Rbbp7	Th1
1.75636e-07	-0.260089	0.54	0.64	0.00491746	2	Peli1	Th1
2.10806e-07	0.253122	0.418	0.336	0.00590215	2	Dph3	Th1
2.79182e-07	-0.36334	0.526	0.65	0.00781654	2	Nfkbia	Th1
3.0796e-07	0.328658	0.331	0.251	0.00862226	2	Irf7	Th1
3.74809e-07	0.257734	0.338	0.257	0.0104939	2	Mknk2	Th1
4.98496e-07	-0.264183	0.312	0.417	0.0139569	2	Fbl	Th1
5.41266e-07	-0.258684	0.149	0.239	0.0151544	2	Irf2bpl	Th1
5.64095e-07	0.262794	0.494	0.415	0.0157935	2	Itgal	Th1
5.68183e-07	-0.521953	0.236	0.327	0.015908	2	Pdcd1	Th1
6.03307e-07	-0.368435	0.436	0.521	0.0168914	2	Hif1a	Th1
6.78576e-07	-0.25964	0.204	0.3	0.0189988	2	Arl5c	Th1
7.18972e-07	-0.274955	0.317	0.424	0.0201298	2	Foxo1	Th1
7.20776e-07	-0.25273	0.453	0.56	0.0201803	2	Pdcd4	Th1
1.02765e-06	0.259703	0.756	0.708	0.0287722	2	Sp100	Th1
1.1144e-06	-0.256964	0.3	0.402	0.0312009	2	Cdkn2d	Th1
1.24061e-06	0.25286	0.403	0.324	0.0347345	2	Snapc5	Th1
1.29432e-06	-0.250178	0.082	0.157	0.0362385	2	Oxsr1	Th1
1.76934e-06	0.260669	0.333	0.261	0.0495381	2	Mpnd	Th1
4.82249e-06	0.251744	0.355	0.285	0.13502	2	Mrpl9	Th1
5.64447e-06	0.288024	0.406	0.339	0.158034	2	Aph1a	Th1
5.67821e-06	0.251012	0.374	0.301	0.158979	2	4930453N24Rik	Th1
6.78526e-06	-0.277191	0.127	0.203	0.189974	2	Mmd	Th1
1.0238e-05	-0.341184	0.344	0.422	0.286643	2	Smc4	Th1
1.21827e-05	-0.268483	0.128	0.201	0.341092	2	Nfkb1	Th1
1.72199e-05	-0.288241	0.376	0.468	0.482123	2	Ubac2	Th1
1.74373e-05	-0.555879	0.99	0.994	0.488209	2	Gm42418	Th1
8.52878e-05	-0.298548	0.594	0.668	1	2	AY036118	Th1
8.7662e-05	-0.277758	0.414	0.493	1	2	Hmgn2	Th1
0.000133512	-0.733709	0.101	0.156	1	2	5830405F06Rik	Th1
0.000238771	-0.425527	0.184	0.251	1	2	Tnfrsf4	Th1
0.000367189	-0.405381	0.605	0.619	1	2	Icos	Th1
0.000608318	0.303434	0.406	0.36	1	2	Bst2	Th1
0.00066592	0.277857	0.223	0.175	1	2	Rtp4	Th1
0.000719962	-0.254012	0.334	0.405	1	2	Tubb4b	Th1
0.00613639	-0.416641	0.363	0.404	1	2	Il7r	Th1
0	3.2403	0.749	0.026	0	3	Igfbp4	Naive
0	2.50524	0.688	0.04	0	3	Ly6c1	Naive
0	1.76256	0.721	0.081	0	3	Sell	Naive
1.32054e-272	1.28818	0.403	0.014	3.69724e-268	3	Pdlim4	Naive
5.83481e-248	1.86072	0.517	0.045	1.63363e-243	3	Dapl1	Naive
1.1321e-244	0.893064	1	1	3.16966e-240	3	Rps24	Naive
4.24487e-229	0.949413	1	0.999	1.18848e-224	3	Rps20	Naive
2.62181e-226	0.918231	1	0.999	7.34054e-222	3	Rps29	Naive
1.63365e-219	0.963885	1	0.999	4.57389e-215	3	Rps19	Naive
2.25194e-219	0.817762	1	1	6.30497e-215	3	Rps4x	Naive
6.48524e-215	0.783361	1	1	1.81574e-210	3	Rpl35a	Naive
6.20765e-213	-2.57536	0.389	0.931	1.73802e-208	3	S100a11	Naive
3.18809e-211	-4.45946	0.031	0.846	8.926e-207	3	S100a6	Naive
7.48202e-207	0.768062	1	1	2.09482e-202	3	Rpl8	Naive
7.6518e-200	0.706987	1	1	2.14235e-195	3	Rpl13	Naive
2.67225e-198	0.773043	1	1	7.48178e-194	3	Rps7	Naive
8.85032e-193	0.781773	1	1	2.47791e-188	3	Rplp1	Naive
3.59908e-192	0.711189	1	1	1.00767e-187	3	Rps5	Naive
6.43904e-190	-2.04872	0.731	0.976	1.8028e-185	3	AW112010	Naive
2.10138e-188	-2.03829	0.703	0.975	5.88344e-184	3	S100a10	Naive
3.39031e-188	0.654276	1	1	9.49218e-184	3	Rpl9	Naive
7.97864e-185	0.632396	1	1	2.23386e-180	3	Rps15a	Naive
1.48686e-183	0.691264	1	1	4.16292e-179	3	Rps9	Naive
2.17217e-183	0.740539	1	1	6.08164e-179	3	Rps27	Naive
2.69152e-183	0.633711	1	1	7.53573e-179	3	Rpl23	Naive
7.72969e-182	0.564373	1	1	2.16416e-177	3	Rpl19	Naive
3.84767e-181	0.632188	1	1	1.07727e-176	3	Rps3a1	Naive
5.58534e-177	0.761976	1	1	1.56378e-172	3	Rpl35	Naive
7.16798e-176	0.689494	1	1	2.00689e-171	3	Rpl39	Naive
8.71314e-176	0.654588	1	1	2.4395e-171	3	Rps8	Naive
1.19569e-171	0.746522	1	0.998	3.34769e-167	3	Rps28	Naive
4.98216e-169	0.558989	1	1	1.3949e-164	3	Eef1a1	Naive
1.3391e-166	0.694333	1	0.999	3.7492e-162	3	Rpl3	Naive
3.19104e-163	0.593678	1	1	8.93427e-159	3	Rps16	Naive
1.10244e-162	0.59924	1	1	3.0866e-158	3	Rpl27a	Naive
3.09028e-162	0.920928	1	0.988	8.65218e-158	3	Rpl36a	Naive
7.75111e-161	0.571288	1	1	2.17015e-156	3	Rps3	Naive
9.15107e-161	0.618725	1	1	2.56212e-156	3	Rpl36	Naive
1.8648e-160	0.569551	1	1	5.22106e-156	3	Rpl21	Naive
9.25121e-158	0.537028	1	1	2.59015e-153	3	Rps27a	Naive
3.22212e-157	0.710524	1	0.998	9.0213e-153	3	Rps18	Naive
9.41472e-156	0.558591	1	1	2.63593e-151	3	Rpl30	Naive
3.42718e-155	0.54229	1	1	9.59541e-151	3	Rps13	Naive
3.75117e-153	-0.907597	1	1	1.05025e-148	3	Actb	Naive
9.47725e-153	0.589294	1	1	2.65344e-148	3	Rpl37a	Naive
1.58146e-152	0.595249	1	1	4.42777e-148	3	Tpt1	Naive
1.4252e-150	-0.890378	0.996	0.998	3.99028e-146	3	Rac2	Naive
1.05017e-149	0.6159	1	1	2.94027e-145	3	Rps23	Naive
1.95424e-149	-2.69581	0.1	0.744	5.47148e-145	3	Itgb1	Naive
8.89537e-149	0.576492	1	1	2.49052e-144	3	Rpl37	Naive
8.13712e-147	0.62809	1	1	2.27823e-142	3	Rps21	Naive
6.8468e-146	0.582904	1	1	1.91697e-141	3	Rpl32	Naive
4.13151e-145	0.530072	1	1	1.15674e-140	3	Rpl18a	Naive
1.73985e-144	1.41957	0.843	0.36	4.87123e-140	3	Ccr7	Naive
6.6674e-144	0.51886	1	1	1.86674e-139	3	Rps10	Naive
7.68631e-139	-1.58852	0.33	0.862	2.15201e-134	3	Prr13	Naive
1.33226e-136	0.711675	1	0.995	3.73006e-132	3	Rpl10	Naive
1.02435e-135	0.660959	1	0.999	2.86798e-131	3	Rps26	Naive
1.20322e-134	0.882668	0.306	0.029	3.36877e-130	3	Atp1b1	Naive
7.05988e-130	-1.84563	0.028	0.656	1.97662e-125	3	Cxcr3	Naive
1.65489e-128	-0.757652	1	1	4.63337e-124	3	Pfn1	Naive
1.20435e-126	-2.33186	0.379	0.837	3.37193e-122	3	Lgals1	Naive
3.81856e-126	1.28303	0.896	0.577	1.06912e-121	3	Lef1	Naive
6.63367e-126	-1.36354	0.762	0.966	1.8573e-121	3	Srgn	Naive
2.81638e-125	0.655301	1	0.997	7.8853e-121	3	Rpl7	Naive
3.64913e-125	0.599006	1	0.999	1.02168e-120	3	Rpl10a	Naive
7.58874e-125	-0.983138	0.945	0.99	2.1247e-120	3	Myl6	Naive
1.63798e-124	-1.5228	0.582	0.917	4.58602e-120	3	Lsp1	Naive
1.23724e-119	0.726743	1	0.987	3.46401e-115	3	Rpl12	Naive
6.47037e-119	-0.997773	0.992	0.999	1.81157e-114	3	Actg1	Naive
4.73172e-118	0.524165	1	1	1.32479e-113	3	Rpl6	Naive
3.11595e-114	0.619883	1	0.996	8.72404e-110	3	Rpl26	Naive
8.30657e-114	-0.691365	1	0.999	2.32567e-109	3	mt-Co1	Naive
8.85218e-114	0.602847	0.194	0.01	2.47843e-109	3	Nacc2	Naive
2.46443e-113	0.449687	1	1	6.8999e-109	3	Rpl11	Naive
1.8368e-111	-1.15532	0.684	0.938	5.14267e-107	3	Gapdh	Naive
1.1783e-110	-1.90235	0.128	0.681	3.29901e-106	3	Icos	Naive
3.06117e-109	-0.926543	0.87	0.976	8.57066e-105	3	Arpc1b	Naive
1.59222e-106	-0.586876	0.998	0.999	4.45789e-102	3	Tmsb4x	Naive
1.46974e-105	0.39455	1	1	4.11499e-101	3	Fau	Naive
2.7883e-99	0.506251	1	1	7.80668e-95	3	Rpl38	Naive
9.3463e-99	-1.92238	0.004	0.532	2.61678e-94	3	S100a4	Naive
6.63144e-98	-0.826716	0.904	0.989	1.85667e-93	3	Laptm5	Naive
3.60548e-95	0.912106	0.955	0.821	1.00946e-90	3	Npc2	Naive
1.71723e-94	-0.684746	0.998	0.995	4.80789e-90	3	Arhgdib	Naive
2.02581e-94	-1.31748	0.872	0.971	5.67186e-90	3	Ifi27l2a	Naive
1.00909e-93	-0.670019	0.972	0.995	2.82525e-89	3	Oaz1	Naive
1.08584e-92	0.497244	1	0.999	3.04013e-88	3	Rpl15	Naive
2.7947e-92	0.417841	1	1	7.82461e-88	3	Rplp0	Naive
7.61268e-90	0.487674	1	1	2.1314e-85	3	Rps2	Naive
6.62201e-89	-0.819099	0.925	0.982	1.85403e-84	3	Ucp2	Naive
1.44699e-88	1.19332	0.676	0.305	4.05129e-84	3	Tsc22d3	Naive
2.9397e-86	-0.684632	0.988	0.999	8.23058e-82	3	Cfl1	Naive
4.64497e-86	-1.14811	0.485	0.836	1.3005e-81	3	S100a13	Naive
7.88117e-84	-0.676116	0.98	0.994	2.20657e-79	3	Itm2b	Naive
9.88244e-84	0.58836	1	0.989	2.76688e-79	3	Eef1b2	Naive
1.83457e-83	-0.830753	0.857	0.958	5.13644e-79	3	Cdc42	Naive
2.75606e-83	-2.6494	0.022	0.49	7.71642e-79	3	Nkg7	Naive
7.80765e-82	-1.62853	0.01	0.476	2.18599e-77	3	Tigit	Naive
1.67151e-80	0.429833	1	0.999	4.6799e-76	3	Rplp2	Naive
4.76973e-80	-1.77501	0.037	0.5	1.33543e-75	3	Anxa2	Naive
7.64705e-80	0.545504	0.998	0.994	2.14102e-75	3	Rpl14	Naive
3.2381e-79	-1.1167	0.303	0.736	9.06603e-75	3	Smap1	Naive
4.60135e-79	0.564521	0.196	0.021	1.28829e-74	3	Pik3ip1	Naive
3.49508e-77	-1.27503	0.145	0.611	9.78554e-73	3	Pglyrp1	Naive
3.48096e-76	-1.3043	0.418	0.787	9.74598e-72	3	Hmgb2	Naive
4.33848e-76	1.11231	0.745	0.353	1.21469e-71	3	Il7r	Naive
6.06569e-76	-0.793204	0.8	0.947	1.69827e-71	3	Ppp1ca	Naive
7.67788e-76	0.489192	0.998	0.998	2.14965e-71	3	Rpl17	Naive
1.90765e-74	0.578452	0.998	0.98	5.34105e-70	3	Rps6	Naive
2.71175e-74	-0.829948	0.741	0.923	7.59235e-70	3	Arpc3	Naive
9.03626e-74	0.511218	0.163	0.014	2.52997e-69	3	St8sia6	Naive
1.37879e-72	0.644487	0.99	0.948	3.86033e-68	3	Npm1	Naive
4.4636e-72	-0.470612	1	1	1.24972e-67	3	mt-Co2	Naive
7.30378e-72	-0.857538	0.688	0.918	2.04491e-67	3	Ndfip1	Naive
2.55337e-71	-0.845416	0.762	0.935	7.14893e-67	3	Lcp1	Naive
1.93485e-70	-0.663491	0.923	0.981	5.41719e-66	3	Arpc2	Naive
1.9654e-70	-1.45021	0.033	0.459	5.50272e-66	3	Ahnak	Naive
3.34104e-70	-0.741695	0.837	0.963	9.35426e-66	3	Clic1	Naive
4.46568e-70	-1.12202	0.352	0.737	1.2503e-65	3	Ctsb	Naive
7.47493e-69	0.903956	0.725	0.379	2.09283e-64	3	Satb1	Naive
9.08037e-69	-0.743566	0.786	0.94	2.54232e-64	3	Capzb	Naive
2.49108e-68	-0.850413	0.625	0.869	6.97451e-64	3	Arpc4	Naive
5.7285e-68	-0.893956	0.631	0.879	1.60387e-63	3	Arpc5	Naive
9.44113e-68	-1.35445	0.289	0.677	2.64333e-63	3	Itga4	Naive
7.22522e-67	-1.31508	0.077	0.498	2.02292e-62	3	Il2rb	Naive
8.94273e-66	0.32816	1	1	2.50379e-61	3	Rpl34	Naive
2.86723e-65	0.631809	0.253	0.049	8.02768e-61	3	Bach2	Naive
3.31662e-65	0.464408	0.157	0.016	9.28587e-61	3	Ifngr2	Naive
3.6788e-65	0.757032	0.318	0.077	1.02999e-60	3	Ramp1	Naive
5.35754e-65	0.331664	0.1	0.004	1.5e-60	3	Acvrl1	Naive
7.40811e-64	-1.16735	0.336	0.716	2.07412e-59	3	Sh2d1a	Naive
7.60624e-64	-0.559742	0.988	0.996	2.1296e-59	3	mt-Co3	Naive
8.43244e-64	-1.11855	0.143	0.557	2.36092e-59	3	Smco4	Naive
2.44765e-63	-0.721365	0.743	0.919	6.85292e-59	3	Ubl5	Naive
2.61811e-63	-0.699617	0.839	0.946	7.33019e-59	3	Myl12a	Naive
3.21529e-61	-0.681409	0.904	0.978	9.00218e-57	3	Cnn2	Naive
8.55055e-61	-0.510834	0.986	0.995	2.39398e-56	3	Serf2	Naive
1.27745e-59	0.293852	1	1	3.57659e-55	3	Rpsa	Naive
2.8149e-59	-0.592462	0.933	0.98	7.88116e-55	3	Psmb8	Naive
1.31822e-58	-0.854592	0.54	0.823	3.69076e-54	3	Rinl	Naive
2.27586e-57	0.381838	1	0.999	6.37196e-53	3	Rps14	Naive
3.88524e-57	-0.509769	0.988	0.998	1.08779e-52	3	H3f3b	Naive
6.09498e-56	-1.14537	0.073	0.447	1.70647e-51	3	Rilpl2	Naive
1.43909e-55	-0.73516	0.694	0.896	4.02917e-51	3	Arl6ip1	Naive
2.47989e-55	-0.804037	0.87	0.956	6.9432e-51	3	Ly6a	Naive
6.47089e-55	-0.736132	0.735	0.92	1.81172e-50	3	Ptprc	Naive
1.4217e-54	0.365599	1	0.999	3.98047e-50	3	Rpl22	Naive
3.24926e-54	-0.997952	0.028	0.383	9.09727e-50	3	Acot7	Naive
9.19818e-54	-0.725072	0.67	0.882	2.57531e-49	3	Fkbp1a	Naive
1.0486e-53	-0.998692	0.02	0.369	2.93586e-49	3	Myo1f	Naive
1.15592e-53	-0.54037	0.941	0.985	3.23634e-49	3	Cox8a	Naive
1.90737e-53	-1.11933	0.391	0.708	5.34027e-49	3	Epsti1	Naive
2.11929e-53	-0.626445	0.864	0.958	5.93359e-49	3	Atp5g3	Naive
1.27434e-52	-1.06463	0.134	0.499	3.56788e-48	3	2310001H17Rik	Naive
1.29964e-52	0.444774	0.145	0.018	3.63874e-48	3	RP23-402A4.1	Naive
1.48589e-52	0.342918	1	1	4.1602e-48	3	Rps11	Naive
2.27994e-52	-0.739987	0.642	0.841	6.38338e-48	3	Prelid1	Naive
2.88915e-52	-0.907473	0.312	0.672	8.08904e-48	3	Cd82	Naive
3.0177e-52	-0.691943	0.851	0.939	8.44897e-48	3	Ldha	Naive
3.35761e-52	0.264731	1	1	9.40064e-48	3	Rpl41	Naive
2.086e-51	-0.690196	0.662	0.888	5.84039e-47	3	Ppib	Naive
4.44237e-51	-0.689276	0.774	0.912	1.24377e-46	3	Ybx1	Naive
1.7483e-50	-1.22463	0.018	0.352	4.89489e-46	3	Pdcd1	Naive
8.19294e-50	-0.678341	0.741	0.899	2.29386e-45	3	Gnas	Naive
1.76185e-49	-0.511063	0.967	0.988	4.93283e-45	3	Myl12b	Naive
7.82941e-49	-0.723742	0.595	0.838	2.19208e-44	3	Gnb2	Naive
8.8532e-49	-4.4172	0.029	0.352	2.47872e-44	3	Ccl5	Naive
1.20124e-48	-1.12241	0.171	0.522	3.36323e-44	3	Batf	Naive
1.61657e-48	-0.622344	0.837	0.947	4.52608e-44	3	Ptprcap	Naive
2.89598e-48	0.795397	0.654	0.37	8.10816e-44	3	Arl4c	Naive
8.86492e-48	-0.793694	0.42	0.735	2.482e-43	3	Calm3	Naive
2.20339e-47	-0.630061	0.971	0.974	6.16904e-43	3	Ms4a4b	Naive
4.1579e-47	-0.505723	0.947	0.988	1.16413e-42	3	Cd3e	Naive
4.18118e-47	-0.780486	0.578	0.819	1.17065e-42	3	Cotl1	Naive
4.60251e-47	0.634991	0.297	0.089	1.28861e-42	3	Il4ra	Naive
9.30042e-47	0.437149	0.161	0.026	2.60393e-42	3	Treml2	Naive
1.79741e-46	-0.557408	0.833	0.943	5.03238e-42	3	Tceb2	Naive
2.10544e-46	-0.98342	0.02	0.333	5.8948e-42	3	Maf	Naive
2.65343e-46	-1.00474	0.09	0.428	7.42907e-42	3	Cst7	Naive
3.05904e-46	-0.744506	0.47	0.81	8.56469e-42	3	Xist	Naive
5.04276e-46	-0.863165	0.361	0.688	1.41187e-41	3	Smpdl3a	Naive
7.76257e-46	-0.837792	0.081	0.419	2.17336e-41	3	Lpxn	Naive
1.65539e-45	-0.455283	0.965	0.989	4.63476e-41	3	Atp5e	Naive
3.95101e-45	-0.418246	0.998	0.999	1.1062e-40	3	Ubb	Naive
4.90555e-45	-0.757008	0.503	0.786	1.37346e-40	3	Calm2	Naive
1.24453e-44	-0.437558	0.994	0.999	3.48443e-40	3	H2-D1	Naive
1.38416e-44	-0.488709	0.937	0.982	3.87537e-40	3	Rbm3	Naive
1.5096e-44	-0.676071	0.766	0.901	4.22658e-40	3	Hmgb1	Naive
2.19546e-44	-0.82415	0.403	0.699	6.14684e-40	3	Txn1	Naive
5.80452e-44	-0.614628	0.804	0.921	1.62515e-39	3	Tspo	Naive
1.03199e-43	-0.919284	0.658	0.859	2.88936e-39	3	H2afz	Naive
1.99731e-43	-0.617973	0.699	0.873	5.59208e-39	3	Polr1d	Naive
5.39617e-43	-0.897543	0.035	0.341	1.51082e-38	3	Rora	Naive
6.39673e-43	-0.95344	0.212	0.548	1.79096e-38	3	Hif1a	Naive
8.05767e-43	-0.749118	0.332	0.672	2.25599e-38	3	Capns1	Naive
8.26791e-43	0.358039	0.998	0.999	2.31485e-38	3	Rpl28	Naive
1.00849e-42	-0.730024	0.55	0.805	2.82357e-38	3	Rap1a	Naive
1.22003e-42	-0.513593	0.917	0.974	3.41585e-38	3	Lck	Naive
1.60699e-42	-0.762159	0.33	0.662	4.49926e-38	3	Lrp10	Naive
2.51347e-42	-0.852952	0.163	0.499	7.03721e-38	3	Ehd3	Naive
4.55822e-42	-0.783547	0.069	0.385	1.27621e-37	3	Mapre2	Naive
7.2907e-42	-0.578156	0.784	0.907	2.04125e-37	3	Cox5b	Naive
1.29155e-41	-0.808809	0.075	0.387	3.6161e-37	3	Gng2	Naive
1.42041e-41	0.26414	1	1	3.97686e-37	3	Rpl18	Naive
2.26698e-41	-0.636372	0.737	0.887	6.34708e-37	3	Prdx1	Naive
8.22103e-41	-0.773405	0.012	0.293	2.30172e-36	3	Bcl2a1d	Naive
8.55678e-41	-0.530809	0.802	0.929	2.39573e-36	3	Cox6b1	Naive
1.28375e-40	0.511842	0.967	0.907	3.59424e-36	3	Rpl5	Naive
2.27723e-40	-0.823998	0.434	0.73	6.37577e-36	3	Cd5	Naive
2.94571e-40	-0.618098	0.607	0.846	8.24741e-36	3	Psmb3	Naive
1.70858e-39	-0.784102	0.171	0.496	4.78369e-35	3	Efhd2	Naive
1.78918e-39	-0.669055	0.519	0.781	5.00934e-35	3	Pomp	Naive
1.95646e-39	-0.876928	0.104	0.414	5.47769e-35	3	Cdc25b	Naive
3.64577e-39	-0.761037	0.407	0.695	1.02074e-34	3	Aprt	Naive
4.68059e-39	-0.324356	1	1	1.31047e-34	3	mt-Atp6	Naive
7.75236e-39	-0.902772	0.057	0.346	2.17051e-34	3	Il18r1	Naive
7.80964e-39	0.455733	0.972	0.944	2.18654e-34	3	Uba52	Naive
1.32009e-38	-0.70464	0.418	0.709	3.69599e-34	3	Vamp8	Naive
1.85368e-38	0.511954	0.916	0.869	5.18994e-34	3	Eef1d	Naive
2.42522e-38	-1.39423	0.136	0.423	6.79014e-34	3	Id2	Naive
3.36324e-38	-0.839519	0.297	0.606	9.4164e-34	3	Gimap7	Naive
5.9961e-38	-0.785823	0.159	0.476	1.67879e-33	3	Nek7	Naive
6.58624e-38	-0.665068	0.758	0.887	1.84402e-33	3	Sub1	Naive
6.61035e-38	-0.770406	0.216	0.537	1.85077e-33	3	Stat4	Naive
8.11425e-38	-0.484923	0.866	0.946	2.27183e-33	3	Cox6c	Naive
2.99733e-37	-0.725693	0.43	0.715	8.39193e-33	3	Itgb2	Naive
4.56565e-37	-0.678211	0.507	0.782	1.27829e-32	3	Cd28	Naive
6.53879e-37	0.671643	0.597	0.354	1.83073e-32	3	Actn1	Naive
9.26344e-37	-0.530841	0.859	0.936	2.59358e-32	3	2022-09-01	Naive
1.27107e-36	0.627135	0.774	0.604	3.55873e-32	3	Gm9493	Naive
1.46603e-36	-0.595322	0.739	0.882	4.10458e-32	3	Gimap4	Naive
1.56167e-36	-0.68199	0.637	0.83	4.37236e-32	3	Abracl	Naive
1.65496e-36	-0.7244	0.226	0.546	4.63356e-32	3	Lamtor4	Naive
1.9669e-36	-0.543967	0.745	0.89	5.50692e-32	3	Atp5j	Naive
3.01291e-36	-0.796973	0.314	0.599	8.43554e-32	3	Tpst2	Naive
3.50897e-36	-0.795349	0.175	0.481	9.82441e-32	3	Nfatc1	Naive
4.59753e-36	-0.739105	0.246	0.556	1.28722e-31	3	Ctsa	Naive
6.12218e-36	-0.71457	0.358	0.655	1.71409e-31	3	Sec11c	Naive
6.589e-36	0.376083	0.996	0.996	1.84479e-31	3	Rps12	Naive
7.12965e-36	-0.774781	0.026	0.287	1.99616e-31	3	Hopx	Naive
1.07769e-35	-0.827582	0.379	0.655	3.01732e-31	3	Slamf6	Naive
1.90454e-35	-0.777725	0.098	0.386	5.33234e-31	3	Pou2f2	Naive
4.38452e-35	-0.741196	0.084	0.37	1.22758e-30	3	Bcl2a1b	Naive
5.92437e-35	-0.766863	0.006	0.249	1.6587e-30	3	Gna15	Naive
6.82914e-35	-0.710118	0.045	0.313	1.91202e-30	3	Cd44	Naive
1.87611e-34	-0.554725	0.678	0.855	5.25272e-30	3	Tma7	Naive
2.14648e-34	-0.988699	0.016	0.261	6.00973e-30	3	Ikzf2	Naive
2.24916e-34	-0.66645	0.361	0.653	6.29719e-30	3	Coro1b	Naive
3.18905e-34	-0.773931	0.222	0.517	8.92869e-30	3	Tnfaip8	Naive
4.60578e-34	-0.360188	0.996	0.996	1.28953e-29	3	Coro1a	Naive
8.20947e-34	-0.583445	0.715	0.871	2.29849e-29	3	Pkm	Naive
1.43193e-33	-0.495361	0.996	0.995	4.00911e-29	3	Cd52	Naive
3.25778e-33	-0.679746	0.075	0.343	9.12112e-29	3	Sh3bgrl	Naive
3.35177e-33	-0.526339	0.676	0.868	9.3843e-29	3	Psmb1	Naive
3.42224e-33	-0.650893	0.444	0.722	9.58158e-29	3	Vasp	Naive
5.51656e-33	-0.507568	0.731	0.885	1.54453e-28	3	Ndufa13	Naive
6.57221e-33	-0.666262	0.43	0.699	1.84009e-28	3	2022-09-09	Naive
6.79202e-33	-0.69417	0.548	0.756	1.90163e-28	3	Ostf1	Naive
7.31616e-33	-0.504129	0.89	0.963	2.04838e-28	3	Calm1	Naive
9.27612e-33	-0.726007	0.22	0.514	2.59713e-28	3	Fyn	Naive
1.36974e-32	-0.776357	0.024	0.262	3.835e-28	3	Cxcr5	Naive
1.82694e-32	-0.777779	0.149	0.426	5.11507e-28	3	Mrps6	Naive
2.08454e-32	-0.509895	0.77	0.902	5.83629e-28	3	Shfm1	Naive
2.9104e-32	-0.851499	0.244	0.528	8.14853e-28	3	Zyx	Naive
3.92356e-32	-0.370054	0.986	0.99	1.09852e-27	3	Cd3d	Naive
5.30616e-32	-0.641483	0.633	0.798	1.48562e-27	3	Gdi2	Naive
5.95164e-32	-0.656136	0.02	0.257	1.66634e-27	3	Casp1	Naive
1.76393e-31	-0.543163	0.756	0.88	4.93866e-27	3	Aldoa	Naive
3.13092e-31	-0.693314	0.204	0.491	8.76594e-27	3	Ap3s1	Naive
3.651e-31	-0.999683	0.864	0.922	1.02221e-26	3	Crip1	Naive
4.21002e-31	-0.505786	0.8	0.92	1.17872e-26	3	Hint1	Naive
4.31481e-31	-0.470993	0.976	0.99	1.20806e-26	3	Ftl1	Naive
4.88109e-31	0.730805	0.387	0.186	1.36661e-26	3	Jun	Naive
5.80064e-31	-0.51881	0.727	0.884	1.62406e-26	3	Gnai2	Naive
6.67028e-31	-1.0696	0.031	0.268	1.86754e-26	3	Tnfrsf4	Naive
6.75387e-31	-0.31903	1	1	1.89095e-26	3	H2-K1	Naive
7.59532e-31	-0.713534	0.206	0.484	2.12654e-26	3	Atpif1	Naive
8.25185e-31	-0.489994	0.813	0.929	2.31035e-26	3	Ndufa4	Naive
8.63986e-31	-0.361512	0.998	0.997	2.41899e-26	3	mt-Nd4l	Naive
2.32705e-30	-0.620345	0.012	0.234	6.51528e-26	3	Ttc39c	Naive
2.38963e-30	-0.476374	0.868	0.947	6.69048e-26	3	mt-Nd4	Naive
3.16821e-30	-1.33851	0.02	0.24	8.87037e-26	3	Cxcr6	Naive
5.14641e-30	-0.675287	0.458	0.7	1.44089e-25	3	Prdx2	Naive
8.69912e-30	-0.484017	0.862	0.95	2.43558e-25	3	Actr3	Naive
1.42651e-29	-0.723179	0.361	0.611	3.99393e-25	3	Pkp3	Naive
1.73904e-29	-0.758264	0.326	0.587	4.86895e-25	3	Cited2	Naive
1.85855e-29	-0.544591	0.564	0.779	5.20356e-25	3	Capza1	Naive
2.22663e-29	0.527203	0.238	0.085	6.23413e-25	3	Tdrp	Naive
3.40885e-29	-1.80799	0.075	0.305	9.54411e-25	3	Ly6c2	Naive
3.4211e-29	-0.695933	0.21	0.484	9.5784e-25	3	Dap	Naive
3.62162e-29	0.533854	0.862	0.73	1.01398e-24	3	Cytip	Naive
3.6761e-29	0.34042	0.106	0.018	1.02924e-24	3	Slc16a5	Naive
8.01113e-29	-0.483787	0.79	0.921	2.24296e-24	3	Psme2	Naive
8.15745e-29	-0.689928	0.24	0.508	2.28392e-24	3	Asap1	Naive
9.25281e-29	-0.476404	0.721	0.881	2.5906e-24	3	Edf1	Naive
9.46802e-29	-0.508346	0.662	0.845	2.65086e-24	3	Fis1	Naive
9.56376e-29	-0.598153	0.049	0.281	2.67766e-24	3	Unc119	Naive
1.03513e-28	-0.485826	0.747	0.893	2.89816e-24	3	Tmbim6	Naive
1.37083e-28	-0.413976	0.831	0.921	3.83806e-24	3	Atp5d	Naive
1.72291e-28	-0.750608	0.13	0.384	4.82381e-24	3	Odc1	Naive
1.91521e-28	-0.836446	0.114	0.362	5.36221e-24	3	Glrx	Naive
4.3098e-28	-0.599865	0.191	0.462	1.20666e-23	3	Ifnar2	Naive
4.32212e-28	0.467511	0.845	0.712	1.21011e-23	3	Tubb5	Naive
5.1164e-28	-0.806197	0.432	0.643	1.43249e-23	3	Dnajc15	Naive
5.22434e-28	-0.42261	0.892	0.96	1.46271e-23	3	Ywhaz	Naive
1.09346e-27	-0.572484	0.472	0.701	3.06148e-23	3	Mrps21	Naive
1.10011e-27	-0.616725	0.004	0.202	3.08009e-23	3	Tbx21	Naive
1.32533e-27	-0.697439	0.008	0.208	3.71067e-23	3	Tox2	Naive
1.55086e-27	-0.429795	0.825	0.925	4.3421e-23	3	Atp5j2	Naive
1.57184e-27	-0.913706	0.018	0.224	4.40083e-23	3	Plac8	Naive
1.62165e-27	-0.532319	0.58	0.797	4.54029e-23	3	Rhog	Naive
1.96307e-27	-0.482006	0.849	0.919	5.49621e-23	3	Gmfg	Naive
2.49701e-27	0.645229	0.566	0.372	6.99113e-23	3	Foxp1	Naive
3.17877e-27	-0.614095	0.46	0.714	8.89991e-23	3	Fam107b	Naive
3.39985e-27	-0.609919	0.403	0.654	9.5189e-23	3	Pla2g16	Naive
3.49257e-27	-0.47686	0.725	0.879	9.7785e-23	3	Rac1	Naive
3.88545e-27	-0.602417	0.507	0.733	1.08785e-22	3	Dynll1	Naive
3.99104e-27	-0.57164	0.02	0.228	1.11741e-22	3	P2rx7	Naive
6.74017e-27	-0.532331	0.894	0.94	1.88711e-22	3	Hcst	Naive
7.00831e-27	-0.851799	0.2	0.455	1.96219e-22	3	Id3	Naive
7.49487e-27	0.431612	0.108	0.021	2.09841e-22	3	Gm14085	Naive
1.01319e-26	-0.573	0.273	0.555	2.83673e-22	3	1110008P14Rik	Naive
1.50236e-26	-0.560902	0.515	0.732	4.20631e-22	3	Cap1	Naive
1.54394e-26	-0.6879	0.222	0.48	4.32273e-22	3	Cd9	Naive
2.05566e-26	-0.587528	0.063	0.287	5.75544e-22	3	Stk39	Naive
2.57771e-26	-0.466178	0.745	0.886	7.21706e-22	3	Gabarap	Naive
3.07683e-26	-0.698779	0.039	0.253	8.61452e-22	3	Ctla4	Naive
3.72973e-26	-0.550929	0.316	0.596	1.04425e-21	3	Ube2l3	Naive
3.90627e-26	-0.540202	0.511	0.73	1.09368e-21	3	Atox1	Naive
4.33674e-26	-0.608745	0.071	0.297	1.2142e-21	3	Lax1	Naive
4.6166e-26	0.654186	0.672	0.515	1.29256e-21	3	Txnip	Naive
5.49119e-26	-0.568074	0.426	0.66	1.53742e-21	3	Psmd8	Naive
6.3347e-26	-0.571442	0.371	0.628	1.77359e-21	3	Lypla2	Naive
7.47333e-26	-0.555957	0.42	0.674	2.09238e-21	3	Arpc5l	Naive
7.6426e-26	0.485261	0.725	0.566	2.13978e-21	3	Rps27rt	Naive
9.97033e-26	-0.636699	0.222	0.473	2.79149e-21	3	Ppp1r12a	Naive
1.03359e-25	-0.606007	0.202	0.464	2.89385e-21	3	Sla	Naive
1.14606e-25	-0.539881	0.057	0.28	3.20874e-21	3	Nsmaf	Naive
1.87764e-25	-0.496742	0.595	0.787	5.25702e-21	3	Atp6v1f	Naive
1.89222e-25	-0.762612	0.699	0.824	5.29783e-21	3	Tagln2	Naive
2.08887e-25	0.447821	0.257	0.101	5.84841e-21	3	Trat1	Naive
2.10928e-25	0.597322	0.305	0.143	5.90555e-21	3	Pdk1	Naive
2.36651e-25	-0.489001	0.552	0.762	6.62574e-21	3	Ppp4c	Naive
2.4174e-25	-0.682835	0.395	0.632	6.76823e-21	3	Ctsd	Naive
2.76325e-25	0.523841	0.609	0.422	7.73656e-21	3	Hmgn1	Naive
2.8216e-25	-0.615262	0.305	0.549	7.89991e-21	3	Pgam1	Naive
2.86542e-25	-0.526126	0.597	0.792	8.02259e-21	3	Wdr1	Naive
3.1647e-25	0.485853	0.265	0.109	8.86051e-21	3	Scml4	Naive
3.17658e-25	-0.563846	0.057	0.273	8.89378e-21	3	Gstt2	Naive
3.45257e-25	-0.588738	0.387	0.646	9.6665e-21	3	Apobec3	Naive
3.61872e-25	-0.490981	0.623	0.824	1.01317e-20	3	Arf1	Naive
3.67039e-25	-0.610983	0.424	0.645	1.02764e-20	3	Zap70	Naive
4.25646e-25	-0.590285	0.432	0.676	1.19172e-20	3	1810058I24Rik	Naive
5.19791e-25	-0.355613	0.941	0.975	1.45531e-20	3	H3f3a	Naive
5.50302e-25	0.571146	0.334	0.167	1.54074e-20	3	Vps37b	Naive
5.72238e-25	-0.473584	0.719	0.853	1.60215e-20	3	Cox5a	Naive
6.39438e-25	-0.517892	0.597	0.792	1.7903e-20	3	Bin2	Naive
6.67605e-25	-0.56335	0.69	0.843	1.86916e-20	3	Mif	Naive
1.09543e-24	-0.591767	0.305	0.548	3.06698e-20	3	Ptp4a2	Naive
1.12735e-24	-0.515786	0.44	0.69	3.15635e-20	3	Ndufa1	Naive
1.50848e-24	-0.57353	0.377	0.624	4.22343e-20	3	Rps27l	Naive
1.52478e-24	0.388946	0.159	0.047	4.26908e-20	3	Rras2	Naive
1.57948e-24	-0.621803	0.509	0.72	4.42224e-20	3	Pycard	Naive
1.64552e-24	-0.594544	0.21	0.468	4.60713e-20	3	Mif4gd	Naive
1.68631e-24	0.268928	0.99	0.976	4.72132e-20	3	Ptma	Naive
1.71462e-24	-0.627159	0.214	0.459	4.80058e-20	3	Snx2	Naive
1.8304e-24	-0.424978	0.764	0.89	5.12476e-20	3	Tmem50a	Naive
2.05032e-24	0.513062	0.774	0.636	5.74049e-20	3	Rabac1	Naive
2.2654e-24	-0.602975	0.218	0.469	6.34266e-20	3	Traf1	Naive
2.31049e-24	-0.687454	0.122	0.348	6.46891e-20	3	Tox	Naive
2.50979e-24	-0.548455	0.342	0.597	7.02692e-20	3	Dynlrb1	Naive
3.82075e-24	-0.546993	0.098	0.329	1.06973e-19	3	Lrmp	Naive
4.08235e-24	-0.5397	0.049	0.256	1.14298e-19	3	Sdcbp2	Naive
4.21291e-24	0.537213	0.462	0.263	1.17953e-19	3	Ccnd2	Naive
4.90817e-24	-0.61208	0.045	0.247	1.37419e-19	3	Tbc1d4	Naive
6.31521e-24	-0.587654	0.092	0.314	1.76813e-19	3	Dok2	Naive
6.6055e-24	-0.578577	0.204	0.452	1.84941e-19	3	Cox17	Naive
6.81901e-24	-0.567177	0.183	0.428	1.90919e-19	3	Ptpn22	Naive
7.91668e-24	-0.535568	0.371	0.624	2.21651e-19	3	Tmem14c	Naive
8.00515e-24	-0.478606	0.607	0.8	2.24128e-19	3	Ndufv3	Naive
1.06323e-23	-0.578677	0.012	0.19	2.97684e-19	3	Nrp1	Naive
1.0681e-23	-0.471616	0.625	0.807	2.99048e-19	3	Uqcr10	Naive
1.1563e-23	-0.507154	0.491	0.711	3.23742e-19	3	Ndufb7	Naive
1.19013e-23	-0.552887	0.022	0.206	3.33212e-19	3	Adam19	Naive
1.23293e-23	-0.278949	0.998	0.999	3.45195e-19	3	mt-Atp8	Naive
1.57721e-23	-0.363105	0.933	0.964	4.41588e-19	3	Gng5	Naive
1.75717e-23	-0.508904	0.037	0.233	4.91973e-19	3	Ccdc50	Naive
1.77817e-23	-0.569254	0.301	0.55	4.97852e-19	3	Sh2d2a	Naive
1.84558e-23	-0.458181	0.562	0.766	5.16727e-19	3	Uqcrb	Naive
1.86893e-23	-0.5845	0.259	0.503	5.23263e-19	3	Hpcal1	Naive
2.61071e-23	-0.628432	0.334	0.571	7.30947e-19	3	BC021614	Naive
2.87791e-23	-0.620505	0.143	0.374	8.05756e-19	3	Atp2b1	Naive
3.63023e-23	0.414133	0.238	0.094	1.01639e-18	3	Ssbp2	Naive
3.71789e-23	0.483766	0.255	0.109	1.04094e-18	3	Smad7	Naive
4.63575e-23	-0.528709	0.379	0.624	1.29792e-18	3	Ccdc12	Naive
6.06804e-23	-0.706117	0.157	0.385	1.69893e-18	3	Tnfsf8	Naive
6.07179e-23	-0.552848	0.206	0.455	1.69998e-18	3	Itgal	Naive
6.45739e-23	-0.554584	0.35	0.587	1.80794e-18	3	Scamp3	Naive
7.32868e-23	-0.53599	0.301	0.549	2.05188e-18	3	Ap2s1	Naive
1.06054e-22	-0.505591	0.409	0.64	2.9693e-18	3	Ywhae	Naive
1.08471e-22	-0.560132	0.149	0.383	3.03696e-18	3	Trim8	Naive
1.16529e-22	-0.977054	0.008	0.176	3.26259e-18	3	Lgals3	Naive
1.39274e-22	-0.474739	0.45	0.696	3.89939e-18	3	Rer1	Naive
1.50121e-22	-0.662155	0.417	0.616	4.20309e-18	3	Anxa6	Naive
1.87943e-22	-0.527748	0.114	0.335	5.26204e-18	3	Pfkp	Naive
2.04986e-22	-0.423838	0.819	0.91	5.7392e-18	3	Ppp1r18	Naive
2.06626e-22	-0.537347	0.301	0.548	5.78511e-18	3	Nap1l1	Naive
2.18765e-22	0.313831	0.122	0.031	6.125e-18	3	Als2cl	Naive
2.24205e-22	-0.535026	0.208	0.45	6.27728e-18	3	Rnh1	Naive
2.39177e-22	-0.904018	0.029	0.207	6.69648e-18	3	Ctla2a	Naive
3.10705e-22	-0.634844	0.029	0.211	8.69912e-18	3	H1f0	Naive
3.26981e-22	-0.51901	0	0.16	9.1548e-18	3	Il18rap	Naive
3.62978e-22	0.53455	0.699	0.543	1.01627e-17	3	Itk	Naive
5.10105e-22	0.393666	0.961	0.926	1.42819e-17	3	Ltb	Naive
6.04187e-22	0.418903	0.951	0.908	1.6916e-17	3	Btg1	Naive
6.51358e-22	0.381523	0.173	0.059	1.82367e-17	3	Cd55	Naive
6.64094e-22	-0.428615	0.709	0.845	1.85933e-17	3	Sri	Naive
7.86493e-22	-0.493153	0.397	0.631	2.20202e-17	3	Psmb2	Naive
9.068e-22	-0.355791	0.857	0.952	2.53886e-17	3	Sumo2	Naive
1.24837e-21	-0.53499	0.194	0.426	3.49519e-17	3	Adprh	Naive
1.7044e-21	0.56757	0.34	0.185	4.77197e-17	3	Klhdc2	Naive
2.04256e-21	-0.550559	0.191	0.427	5.71876e-17	3	Ptpn7	Naive
2.60929e-21	-0.49996	0.36	0.605	7.30548e-17	3	Dbi	Naive
3.6698e-21	-0.453763	0.589	0.78	1.02747e-16	3	Psma3	Naive
4.08925e-21	-0.485698	0.071	0.267	1.14491e-16	3	Rab19	Naive
6.04629e-21	-0.468346	0.014	0.176	1.69284e-16	3	Endod1	Naive
6.11277e-21	-0.474543	0.053	0.242	1.71145e-16	3	Rgs3	Naive
6.33848e-21	-0.389302	0.729	0.879	1.77465e-16	3	Ndufa3	Naive
6.76481e-21	0.296801	0.996	0.983	1.89401e-16	3	Gnb2l1	Naive
7.24225e-21	-0.501756	0.287	0.524	2.02768e-16	3	Txndc17	Naive
7.49553e-21	-0.469588	0.029	0.2	2.0986e-16	3	Fut8	Naive
7.81313e-21	-0.506434	0.363	0.608	2.18752e-16	3	Bloc1s1	Naive
7.89964e-21	-0.503171	0.585	0.76	2.21174e-16	3	Gabarapl2	Naive
8.39493e-21	-0.465279	0.028	0.199	2.35041e-16	3	Litaf	Naive
8.54863e-21	0.553603	0.418	0.256	2.39344e-16	3	Txk	Naive
9.74218e-21	-0.471718	0.676	0.826	2.72761e-16	3	mt-Nd5	Naive
9.79988e-21	0.30009	0.122	0.033	2.74377e-16	3	Igsf23	Naive
1.01721e-20	0.281649	1	0.981	2.84797e-16	3	Rpl4	Naive
1.19609e-20	-0.469909	0.026	0.193	3.3488e-16	3	Arhgap26	Naive
1.68231e-20	-0.482839	0.381	0.62	4.71014e-16	3	1110008F13Rik	Naive
1.7018e-20	-0.356982	0.868	0.937	4.76469e-16	3	Arf5	Naive
1.93949e-20	-0.522313	0.104	0.31	5.4302e-16	3	Dck	Naive
2.20515e-20	-0.51774	0.065	0.253	6.17399e-16	3	Tspan3	Naive
2.26022e-20	-0.302676	0.988	0.992	6.32816e-16	3	Cd3g	Naive
2.38871e-20	-0.491956	0.271	0.51	6.68792e-16	3	Rab1b	Naive
3.27862e-20	-0.529238	0.395	0.622	9.17949e-16	3	Cd48	Naive
3.93377e-20	-0.448193	0.733	0.86	1.10138e-15	3	H2-Q7	Naive
4.12866e-20	-0.382075	0.772	0.876	1.15594e-15	3	Dad1	Naive
4.34492e-20	-0.453824	0.845	0.92	1.21649e-15	3	Cyba	Naive
4.54939e-20	-0.539314	0.189	0.411	1.27374e-15	3	Prex1	Naive
4.79642e-20	-0.466393	0.528	0.73	1.3429e-15	3	Smdt1	Naive
4.89318e-20	-0.543395	0.314	0.536	1.36999e-15	3	Itm2c	Naive
4.97236e-20	0.480734	0.263	0.124	1.39216e-15	3	Sh3bp5	Naive
6.96831e-20	-0.455591	0.381	0.627	1.95099e-15	3	Tmem167	Naive
7.89843e-20	-0.468876	0.552	0.75	2.2114e-15	3	Arf6	Naive
8.15024e-20	-0.492328	0.228	0.461	2.28191e-15	3	Rab11a	Naive
9.26448e-20	0.5051	0.503	0.34	2.59387e-15	3	4930523C07Rik	Naive
1.1353e-19	-0.469921	0.018	0.175	3.17862e-15	3	Eea1	Naive
1.18435e-19	-0.514807	0.147	0.362	3.31595e-15	3	Maz	Naive
1.21691e-19	-0.45858	0.468	0.696	3.40711e-15	3	Map1lc3b	Naive
1.31507e-19	-0.491625	0.267	0.503	3.68193e-15	3	Hcls1	Naive
1.47079e-19	-0.509521	0.204	0.43	4.11791e-15	3	Ubl3	Naive
1.75814e-19	-0.529856	0.138	0.346	4.92243e-15	3	Tpi1	Naive
2.11437e-19	0.50389	0.536	0.378	5.91982e-15	3	Klf13	Naive
2.77169e-19	-0.399713	0.002	0.143	7.76018e-15	3	Plscr1	Naive
2.79503e-19	-0.401122	0.719	0.844	7.82553e-15	3	Usmg5	Naive
3.33673e-19	-0.443372	0.177	0.403	9.34217e-15	3	Dctn2	Naive
3.59567e-19	-0.432838	0.472	0.689	1.00672e-14	3	Uqcr11	Naive
3.8604e-19	-0.531678	0.23	0.456	1.08083e-14	3	Rabgap1l	Naive
4.57719e-19	-0.44683	0.515	0.719	1.28152e-14	3	Ndufb9	Naive
4.74537e-19	-0.489015	0.261	0.49	1.32861e-14	3	Glmp	Naive
5.35972e-19	-0.491132	0.399	0.616	1.50062e-14	3	Lcp2	Naive
5.93826e-19	-0.465825	0.069	0.25	1.66259e-14	3	Rab8b	Naive
6.72708e-19	-0.488803	0.31	0.534	1.88345e-14	3	Psma4	Naive
6.90319e-19	-0.462526	0.395	0.615	1.93276e-14	3	Ostc	Naive
7.50381e-19	-0.425211	0.564	0.766	2.10092e-14	3	Ost4	Naive
7.85206e-19	-0.455243	0.012	0.158	2.19842e-14	3	Stx11	Naive
7.97004e-19	-0.463246	0.413	0.642	2.23145e-14	3	Cd4	Naive
8.88212e-19	-0.552119	0.322	0.543	2.48682e-14	3	Flna	Naive
1.07629e-18	-0.482145	0.189	0.408	3.0134e-14	3	Slc1a5	Naive
1.25009e-18	-0.472586	0.024	0.176	3.50001e-14	3	Podnl1	Naive
1.28001e-18	-0.485052	0.067	0.242	3.58377e-14	3	Lpcat4	Naive
1.2805e-18	-0.436396	0.656	0.806	3.58513e-14	3	Gm8369	Naive
1.32101e-18	-0.438829	0.593	0.762	3.69855e-14	3	Cox7b	Naive
1.51136e-18	-0.784535	0.12	0.296	4.23151e-14	3	Ctsw	Naive
1.67e-18	-0.428566	0.008	0.149	4.67566e-14	3	Casp4	Naive
1.74627e-18	-0.479337	0.672	0.805	4.8892e-14	3	Itgb7	Naive
1.78601e-18	-0.4588	0.041	0.203	5.00048e-14	3	Ccdc28b	Naive
1.7962e-18	-0.491736	0.415	0.626	5.02901e-14	3	Psma6	Naive
1.95316e-18	-0.458577	0.181	0.399	5.46845e-14	3	Borcs8	Naive
2.1731e-18	-0.459298	0.354	0.583	6.08425e-14	3	Bax	Naive
2.26033e-18	0.445088	0.234	0.108	6.32847e-14	3	Rab3ip	Naive
2.65256e-18	-0.52433	0.179	0.391	7.42665e-14	3	Ikzf3	Naive
2.75699e-18	-0.44706	0.031	0.185	7.71903e-14	3	Serpinb6b	Naive
2.89984e-18	-0.43299	0.418	0.651	8.11898e-14	3	Brk1	Naive
3.01435e-18	-0.444648	0.002	0.136	8.43958e-14	3	Ifng	Naive
3.0526e-18	-0.430619	0.637	0.796	8.54667e-14	3	Arhgdia	Naive
3.53227e-18	-0.49909	0.32	0.547	9.88965e-14	3	Rnf138	Naive
4.95282e-18	-0.462334	0.094	0.283	1.38669e-13	3	Slc9a9	Naive
5.78683e-18	-0.467121	0.098	0.281	1.6202e-13	3	Capn2	Naive
6.06423e-18	-0.480771	0.189	0.397	1.69786e-13	3	Psen2	Naive
6.85702e-18	-0.371721	0.711	0.836	1.91983e-13	3	Ppp1cc	Naive
6.87799e-18	-0.392928	0.652	0.797	1.9257e-13	3	Ube2i	Naive
8.01987e-18	-0.473841	0.238	0.454	2.2454e-13	3	Eif4e2	Naive
8.5073e-18	-0.437515	0.283	0.515	2.38187e-13	3	Psma1	Naive
1.00908e-17	-0.400807	0.041	0.202	2.82521e-13	3	Ezh2	Naive
1.02578e-17	-0.422726	0.057	0.224	2.87197e-13	3	Baz1a	Naive
1.27834e-17	-0.451948	0.106	0.292	3.57909e-13	3	Nab1	Naive
1.28362e-17	-0.549911	0.212	0.414	3.59389e-13	3	Prkca	Naive
1.29753e-17	-0.354562	0.811	0.9	3.63283e-13	3	Sec61b	Naive
1.36299e-17	-0.45393	0.147	0.344	3.81609e-13	3	Map4k1	Naive
1.42004e-17	-0.451389	0.485	0.681	3.97583e-13	3	1810037I17Rik	Naive
1.49957e-17	-0.438462	0.354	0.58	4.1985e-13	3	Tln1	Naive
1.7496e-17	-0.435744	0.132	0.328	4.89853e-13	3	Syngr2	Naive
1.95681e-17	0.408762	0.733	0.612	5.47868e-13	3	Peli1	Naive
1.96468e-17	-0.472137	0.108	0.295	5.50071e-13	3	Mcm6	Naive
1.97369e-17	-0.409591	0.43	0.643	5.52595e-13	3	Esd	Naive
2.36392e-17	-0.410446	0.546	0.727	6.61849e-13	3	Nedd8	Naive
2.92576e-17	-0.447824	0	0.125	8.19155e-13	3	Asb2	Naive
3.21713e-17	-0.416224	0.562	0.75	9.00732e-13	3	Tbc1d10c	Naive
3.27583e-17	-0.441236	0.55	0.723	9.17166e-13	3	Prkar1a	Naive
3.30212e-17	-0.442349	0.568	0.736	9.24528e-13	3	Spcs1	Naive
3.46842e-17	-0.402781	0.527	0.72	9.71089e-13	3	Akr1b3	Naive
3.85876e-17	-0.323103	0.986	0.988	1.08037e-12	3	Hsp90ab1	Naive
4.46458e-17	-0.460511	0.106	0.292	1.24999e-12	3	Lgals3bp	Naive
5.21414e-17	-0.395082	0	0.124	1.45985e-12	3	Gm44160	Naive
5.47317e-17	-0.525423	0.269	0.485	1.53238e-12	3	Spn	Naive
5.61249e-17	-0.359747	0.733	0.852	1.57139e-12	3	Chchd2	Naive
5.69532e-17	-0.430708	0.073	0.242	1.59457e-12	3	Crot	Naive
5.84705e-17	-0.419732	0.09	0.268	1.63706e-12	3	Htatip2	Naive
6.41301e-17	-0.4184	0.126	0.316	1.79551e-12	3	Bak1	Naive
6.54968e-17	-0.41365	0.016	0.152	1.83378e-12	3	Tnfsf11	Naive
6.61983e-17	-0.434318	0.418	0.63	1.85342e-12	3	Sash3	Naive
6.66041e-17	-0.459786	0.354	0.566	1.86478e-12	3	Ube2n	Naive
7.08909e-17	-0.484903	0.212	0.418	1.9848e-12	3	Cnot6l	Naive
7.61463e-17	-0.35732	0.745	0.854	2.13194e-12	3	Atp5f1	Naive
7.84984e-17	-0.367858	0.012	0.145	2.1978e-12	3	Atxn1	Naive
7.99554e-17	0.374445	0.167	0.066	2.23859e-12	3	Tgfbr3	Naive
8.98466e-17	-0.455385	0.413	0.624	2.51552e-12	3	Ifi27	Naive
9.70317e-17	-0.441758	0.187	0.393	2.71669e-12	3	Cyb5r4	Naive
1.04739e-16	-0.418429	0.344	0.577	2.93248e-12	3	Bag1	Naive
1.04764e-16	0.399881	0.253	0.126	2.93319e-12	3	Rgcc	Naive
1.12749e-16	-0.421119	0.126	0.314	3.15674e-12	3	Ube2f	Naive
1.13252e-16	0.452388	0.534	0.392	3.17084e-12	3	Foxo1	Naive
1.19509e-16	-0.389525	0.035	0.183	3.34602e-12	3	Oas1a	Naive
1.19998e-16	-0.382448	0.597	0.751	3.35971e-12	3	Cox6a1	Naive
1.20426e-16	-0.474547	0.344	0.561	3.37168e-12	3	Gimap5	Naive
1.34669e-16	-0.674134	0.004	0.127	3.77046e-12	3	Ccr2	Naive
1.35017e-16	-0.368838	0.016	0.15	3.7802e-12	3	Hip1r	Naive
1.4066e-16	-0.458257	0.424	0.621	3.93821e-12	3	Vcp	Naive
1.43102e-16	-0.32711	0.933	0.96	4.00657e-12	3	mt-Nd1	Naive
1.51793e-16	-0.373515	0	0.12	4.24991e-12	3	Runx2	Naive
1.63414e-16	-0.465613	0.183	0.382	4.57526e-12	3	Sipa1	Naive
1.65185e-16	-0.46118	0.212	0.411	4.62485e-12	3	Mvb12a	Naive
1.69316e-16	-0.393598	0.585	0.761	4.7405e-12	3	Psma7	Naive
1.84252e-16	0.378563	0.246	0.122	5.1587e-12	3	Ugcg	Naive
1.91262e-16	0.448135	0.434	0.287	5.35495e-12	3	Il6ra	Naive
1.99632e-16	0.421625	0.273	0.143	5.58929e-12	3	Snhg12	Naive
2.3582e-16	-0.432202	0.385	0.598	6.60248e-12	3	Tmem160	Naive
2.35835e-16	-0.266271	0.986	0.995	6.60292e-12	3	Shisa5	Naive
2.51259e-16	-0.413657	0.625	0.781	7.03476e-12	3	Arl6ip5	Naive
2.57961e-16	-0.365315	0.668	0.821	7.22239e-12	3	Atp6v0e	Naive
2.77164e-16	-0.43379	0.444	0.636	7.76004e-12	3	Ndufb8	Naive
2.83008e-16	-0.434293	0.151	0.345	7.92366e-12	3	Mtch1	Naive
2.91478e-16	-0.387944	0.639	0.783	8.16079e-12	3	Erh	Naive
3.41665e-16	-0.425166	0.128	0.312	9.56592e-12	3	3830406C13Rik	Naive
4.22915e-16	0.274312	0.104	0.031	1.18408e-11	3	Gm13546	Naive
4.52945e-16	-0.33869	0.002	0.121	1.26815e-11	3	Zdhhc2	Naive
5.07505e-16	-0.429592	0.157	0.348	1.42091e-11	3	Pon2	Naive
5.24784e-16	-0.388714	0.071	0.233	1.46929e-11	3	Sypl	Naive
5.28745e-16	-0.382448	0.081	0.249	1.48038e-11	3	Map2k3	Naive
5.34622e-16	-0.459417	0.185	0.384	1.49683e-11	3	Crlf2	Naive
5.41595e-16	-0.435417	0.047	0.194	1.51636e-11	3	Slc4a7	Naive
5.45855e-16	-0.403273	0.092	0.264	1.52828e-11	3	Ppil1	Naive
5.68989e-16	-0.395609	0.603	0.755	1.59306e-11	3	Taldo1	Naive
5.73707e-16	-0.431342	0.108	0.281	1.60627e-11	3	Mthfsl	Naive
7.17026e-16	-0.392385	0.047	0.196	2.00753e-11	3	Unc119b	Naive
8.51027e-16	-0.393494	0.729	0.844	2.3827e-11	3	Ypel3	Naive
8.70305e-16	-0.341304	0.972	0.99	2.43668e-11	3	Ly6e	Naive
9.51825e-16	-0.349848	0.004	0.122	2.66492e-11	3	Fam129a	Naive
9.67762e-16	-0.387246	0.081	0.245	2.70954e-11	3	Dctpp1	Naive
9.79601e-16	-0.310327	0.9	0.941	2.74269e-11	3	Atp5l	Naive
1.08488e-15	-0.392661	0.536	0.729	3.03745e-11	3	Ywhah	Naive
1.11096e-15	-0.518065	0.163	0.344	3.11046e-11	3	Glipr2	Naive
1.34011e-15	-0.396014	0.045	0.191	3.75205e-11	3	Syt11	Naive
1.34314e-15	0.425729	0.24	0.123	3.76052e-11	3	Epb41l4aos	Naive
1.37962e-15	-0.439932	0.395	0.603	3.86266e-11	3	Fmnl1	Naive
1.49613e-15	0.327288	0.904	0.871	4.18886e-11	3	Nsa2	Naive
1.55429e-15	0.411298	0.591	0.462	4.35171e-11	3	Gm11808	Naive
1.64199e-15	-0.461468	0.059	0.209	4.59724e-11	3	Mmd	Naive
1.71119e-15	-0.404942	0.224	0.429	4.79098e-11	3	Cstb	Naive
1.74824e-15	0.486455	0.656	0.544	4.89472e-11	3	Rapgef6	Naive
1.83865e-15	-0.407089	0.106	0.278	5.14785e-11	3	Pnp	Naive
1.85692e-15	-0.396749	0.485	0.684	5.199e-11	3	Tprgl	Naive
1.85734e-15	-0.412649	0.004	0.119	5.20019e-11	3	Apobec2	Naive
1.91401e-15	0.299447	0.151	0.059	5.35884e-11	3	Ttyh3	Naive
1.94739e-15	-0.353588	0.845	0.918	5.45229e-11	3	Ets1	Naive
2.02505e-15	-0.481943	0.147	0.329	5.66973e-11	3	Ptpn11	Naive
2.13042e-15	-0.446276	0.181	0.371	5.96475e-11	3	Rsu1	Naive
2.22837e-15	-0.350131	0.033	0.171	6.23899e-11	3	Ms4a6d	Naive
2.24046e-15	-0.373049	0.035	0.173	6.27285e-11	3	Wdfy1	Naive
2.25459e-15	-0.408208	0.022	0.149	6.31241e-11	3	St6galnac3	Naive
2.71771e-15	-0.329648	0.01	0.13	7.60905e-11	3	Lxn	Naive
3.02565e-15	-0.399784	0.456	0.654	8.47123e-11	3	Tsc22d4	Naive
3.33872e-15	-0.374639	0.136	0.321	9.34775e-11	3	Gyg	Naive
3.63177e-15	-0.36596	0.126	0.308	1.01682e-10	3	Ap1s1	Naive
3.64789e-15	-0.393818	0.092	0.256	1.02134e-10	3	Vamp5	Naive
3.779e-15	-0.430704	0.505	0.688	1.05804e-10	3	Reep5	Naive
3.82825e-15	-0.396537	0.059	0.207	1.07183e-10	3	Ttc39b	Naive
3.87304e-15	-0.430996	0.273	0.483	1.08437e-10	3	Ech1	Naive
3.91724e-15	-0.384719	0.532	0.727	1.09675e-10	3	Sap18	Naive
4.13991e-15	-0.443605	0.324	0.529	1.15909e-10	3	Wipf1	Naive
4.37593e-15	-0.39313	0.417	0.628	1.22517e-10	3	Fkbp8	Naive
4.8298e-15	-0.420874	0.328	0.539	1.35225e-10	3	Ap2m1	Naive
5.00582e-15	-0.339416	0.715	0.845	1.40153e-10	3	Gpsm3	Naive
6.03552e-15	-0.412704	0.338	0.541	1.68983e-10	3	Celf2	Naive
6.1961e-15	-0.370398	0.464	0.672	1.73478e-10	3	Tecr	Naive
6.58341e-15	-0.413442	0.128	0.3	1.84322e-10	3	Stx6	Naive
6.88248e-15	-0.385291	0.682	0.807	1.92696e-10	3	Rsrp1	Naive
6.9049e-15	-0.398907	0.139	0.319	1.93323e-10	3	Fnbp1	Naive
7.35354e-15	-0.387957	0.12	0.289	2.05884e-10	3	Tspan31	Naive
7.90899e-15	-0.376799	0.012	0.129	2.21436e-10	3	Slamf7	Naive
7.93905e-15	-0.363514	0.54	0.715	2.22277e-10	3	Sumo1	Naive
8.24961e-15	-0.342716	0.028	0.158	2.30973e-10	3	Casp3	Naive
8.8575e-15	-0.369479	0.511	0.706	2.47992e-10	3	Myeov2	Naive
9.35368e-15	-0.368541	0.079	0.236	2.61884e-10	3	Nucb1	Naive
9.42665e-15	-0.401538	0.138	0.313	2.63927e-10	3	Gng10	Naive
9.82383e-15	-0.382747	0.338	0.542	2.75048e-10	3	Lrrfip1	Naive
1.00603e-14	-0.408166	0.44	0.634	2.81667e-10	3	Tmed9	Naive
1.13448e-14	-0.339638	0.026	0.154	3.17631e-10	3	Lnx2	Naive
1.2608e-14	-0.448033	0.346	0.546	3.52998e-10	3	Glud1	Naive
1.27271e-14	-0.427878	0.222	0.417	3.56332e-10	3	B3gnt2	Naive
1.28046e-14	-0.350224	0.031	0.161	3.58505e-10	3	CAAA01147332.1	Naive
1.30825e-14	-0.406773	0.428	0.625	3.66283e-10	3	Chmp4b	Naive
1.40096e-14	0.342705	0.76	0.667	3.92242e-10	3	Hnrnpa1	Naive
1.40464e-14	0.394336	0.666	0.573	3.93272e-10	3	Mrpl30	Naive
1.52188e-14	-0.360988	0.065	0.215	4.26095e-10	3	Plekhb2	Naive
1.53764e-14	-0.363893	0.033	0.164	4.30509e-10	3	Sntb2	Naive
1.76426e-14	0.305266	0.951	0.902	4.93957e-10	3	Rpl31	Naive
1.78942e-14	-0.425155	0.287	0.488	5.01001e-10	3	Camk2d	Naive
1.88225e-14	-0.380291	0.059	0.203	5.26993e-10	3	Dus2	Naive
1.92124e-14	-0.398366	0.157	0.337	5.37907e-10	3	Tmem126a	Naive
2.05322e-14	-0.400832	0.295	0.494	5.7486e-10	3	Ptpn6	Naive
2.13973e-14	-0.365586	0.609	0.767	5.99083e-10	3	Tmem258	Naive
2.17521e-14	-0.357582	0.705	0.829	6.09015e-10	3	Gpi1	Naive
2.72803e-14	-0.41006	0.218	0.412	7.63795e-10	3	Ssbp4	Naive
2.79067e-14	-0.395885	0.458	0.646	7.81332e-10	3	Ndufa11	Naive
2.91114e-14	-0.467675	0	0.103	8.15062e-10	3	Anxa1	Naive
3.03676e-14	-0.352293	0.593	0.762	8.50233e-10	3	Scand1	Naive
3.15286e-14	-0.28442	0	0.103	8.82739e-10	3	Ptpn13	Naive
3.28925e-14	-0.39263	0.261	0.456	9.20924e-10	3	Ppp2r1a	Naive
3.7236e-14	-0.325105	0.788	0.89	1.04253e-09	3	Sec61g	Naive
4.00447e-14	-0.285601	0	0.102	1.12117e-09	3	Osbpl3	Naive
4.35083e-14	-0.342153	0.69	0.832	1.21815e-09	3	Eno1	Naive
4.57498e-14	-0.417037	0.348	0.545	1.2809e-09	3	Mrpl57	Naive
4.63112e-14	-0.355886	0.607	0.75	1.29662e-09	3	Csk	Naive
5.05969e-14	-0.417817	0.161	0.344	1.41661e-09	3	Slbp	Naive
5.08595e-14	-0.258671	0.992	0.994	1.42396e-09	3	mt-Cytb	Naive
5.59794e-14	-0.372069	0.623	0.777	1.56731e-09	3	Hn1	Naive
5.70034e-14	-0.374052	0.265	0.465	1.59598e-09	3	Lamtor5	Naive
6.98783e-14	-0.297091	0	0.101	1.95645e-09	3	Cela1	Naive
6.98783e-14	-0.427347	0	0.101	1.95645e-09	3	Klrc1	Naive
7.24547e-14	-0.427883	0.348	0.538	2.02859e-09	3	Xrn2	Naive
7.56534e-14	-0.419247	0	0.1	2.11814e-09	3	Bhlhe40	Naive
7.94544e-14	-0.414853	0.342	0.541	2.22457e-09	3	Ghitm	Naive
8.94649e-14	-0.39447	0.263	0.459	2.50484e-09	3	Ndufs6	Naive
9.03455e-14	-0.335757	0.004	0.108	2.52949e-09	3	Emp1	Naive
9.03827e-14	-0.332079	0.039	0.168	2.53053e-09	3	Tmem238	Naive
1.09253e-13	-0.393446	0.236	0.428	3.05886e-09	3	Ak2	Naive
1.12918e-13	-0.368228	0.169	0.348	3.16149e-09	3	Taok3	Naive
1.33585e-13	-0.387157	0.055	0.189	3.74012e-09	3	Lysmd2	Naive
1.36234e-13	-0.390537	0.34	0.535	3.81428e-09	3	Mrpl54	Naive
1.49903e-13	-0.379688	0.126	0.289	4.19697e-09	3	Agpat3	Naive
1.52358e-13	-0.401569	0.369	0.565	4.26572e-09	3	Sh3kbp1	Naive
1.57787e-13	-0.382557	0.285	0.48	4.41773e-09	3	Rab10	Naive
1.60481e-13	-0.853473	0.507	0.626	4.49316e-09	3	Vim	Naive
1.67041e-13	-0.442418	0.016	0.126	4.67683e-09	3	Marcksl1	Naive
1.6764e-13	-0.421662	0.548	0.708	4.6936e-09	3	Cd27	Naive
[truncated: 3,166 more rows]

## Sheet: Sheet1
			Capzb	Rplp2		Il7r			Tcm top50
	Rps24		Cd52	Rps19		S100a4			Cd52	8
	Rps27		Cxcr6	Rpl9		S100a6			BC021614	11
	Rps5		BC021614	Rpl36		Tigit			Polr1d	8
	Rps16		Polr1d	Rps2		Nkg7			Ucp2	8
	Rps19		Ccnd2	Rps16		Tpt1			Prelid1	11
			Rilpl2	Rpl8		Pglyrp1			Actg1	11
	Rps3a1		Bcl2a1d	Rpl10		Atp5g3			Pomp	9
	Rplp1		Ucp2	Rpl36a		Cd52			Arpc3	8
	Rps29		Prelid1	Rps23		Junb			Gnas	11
	Rpl8		Atp5d	Rplp1		Emp3			Myl6	8
			Mrps6	Rps4x		Arl4c			Tpt1	9
			Actg1	Rps24		Batf			Pdcd1	9
	mt-Co1		Pomp	Rpl30		Btg1			Acot7	9
	Rps21		Arpc3	Rpl37a		Icos			Pfn1	8
	Rpl9		Gnas	Rpl13		Pfn1			Serf2	8
	Rps4x		Myl6	Rps5		Sh2d1a			Cd3d	8
	Rpl30		Tpt1	Rps3a1		Ccr4
	Rpl12		Pdcd1	Rps28		Anxa2
	Rpl13		Actb	Rps21		S100a11			Early top50
			Acot7	Rps29		AW112010
	Rpl37a		Pfn1	Rpl12		Cd3d
			Serf2			Sub1
	Rps28		Cd3d			Rabac1
			Psmb9			BC021614
						Ostf1
						Cox8a
	Rpl36					Gapdh
						Thy1
						Pdcd1
						Klf2
						1110034G24Rik
	Rps2					Actg1
						Serf2
	Rps23					Gnas
						Arpc5
						Tox2
						Rac2
	Rplp2					Myl6
	Rpl10					Ucp2
						Hmgb2
						Acot7
						H3f3a
						Ap3s1
						S100a10
						Pomp
						Cd27
						Prelid1
						Arpc3
	mt-Co2					Polr1d
	Rpl36a
	mt-Co3
	Rilpl2
	Atp5d
	Gm19585
	Mrps6
	Capzb
	Ccl5
	Gimap4
	Itgb1
	Ccnd2
	Tsc22d3
	Trat1
	Abracl
	Rps27l
	Litaf
	Ikzf2
	Ubl5
	Ccdc28b
	Tox
	Psmb9
	Lgals3
	Ifi27l2a
	Cxcr5
	Cxcr6
	Bcl2a1d
