# Supplementary material for: CRISPR screens reveal neuropeptide signaling orchestrates T helper cell differentiation
Source: Research Square preprint supplement (doi:10.21203/rs.3.rs-1953978/v1), 2022-08-16
Supplement: Supplementary file 9 [file d1695babfd20b7b8d74182f7.xlsx]

## Sheet: Th1
seqnames

## Sheet: Th2
seqnames
